# Supplementary material for: Organophotocatalytic dearomatization of indoles, pyrroles and benzo(thio)furans via a Giese-type transformation
Source: PubMed Central journal article supplement (PMC9814947; doi:10.1038/s42004-021-00460-y), 2021-02-19
Supplement: 42004_2021_460_MOESM1_ESM.pdf [file 42004_2021_460_MOESM1_ESM.pdf]

*This manuscript has been previously reviewed at another Nature Research journal. This document only contains reviewer comments and rebuttal letters for versions considered at Communications Chemistry.*

## REVIEWERS' COMMENTS:

### Reviewer #1 (Remarks to the Author):

Overall, the authors have done an admirable job of addressing the comments and suggestions by the reviewers. However, it would appear that a lot of valuable information from the additional experiments, primarily those focused on the method's limitations, were added to the SI rather than the manuscript (responses to reviewer 1 in #'s 1, 2, and 4). It is incredibly valuable to the community to know advantages and limitations. Rather than burying this information in a large SI file, this should be included in the manuscript. This can be achieved through either additional text or endnote citations that provide a reference for the reader as to what was examined and what failed. Aside from this relatively minor correction, the current submission appears suitable for publication in Nat. Commun.

---

January 20, 2021

Reviewer 1

---

1. “However, it would appear that a lot of valuable information from the additional experiments, primarily those focused on the method’s limitations, were added to the SI rather than the manuscript (responses to reviewer 1 in #'s 1, 2, and 4). It is incredibly valuable to the community to know advantages and limitations. Rather than burying this information in a large SI file, this should be included in the manuscript. This can be achieved through either additional text or endnote citations that provide a reference for the reader as to what was examined and what failed..”

**Response:** As suggested, we have added discussion and the unsuccessful substrates in the main manuscript to reveal the limitations of this strategy.
