# Supplementary material for: Organophotocatalytic dearomatization of indoles, pyrroles and benzo(thio)furans via a Giese-type transformation
Source: PubMed Central journal article supplement (PMC9814947; doi:10.1038/s42004-021-00460-y), 2021-02-19
Supplement: 42004_2021_460_MOESM3_ESM.pdf [file 42004_2021_460_MOESM3_ESM.pdf]

## **Description of Additional Supplementary Files**

File Name: Supplementary Data 1

Description: Original  $^1\text{H}$  and  $^{13}\text{C}$  NMR Spectra.

File Name: Supplementary Data 2

Description: Chiral HPLC analysis trace.
