# Supplementary material for: Organophotocatalytic dearomatization of indoles, pyrroles and benzo(thio)furans via a Giese-type transformation
Source: PubMed Central journal article supplement (PMC9814947; doi:10.1038/s42004-021-00460-y), 2021-02-19
Supplement: 42004_2021_460_MOESM4_ESM.pdf [file 42004_2021_460_MOESM4_ESM.pdf]

### Supplementary Data 1: $^1\text{H}$ and $^{13}\text{C}$ NMR Spectra

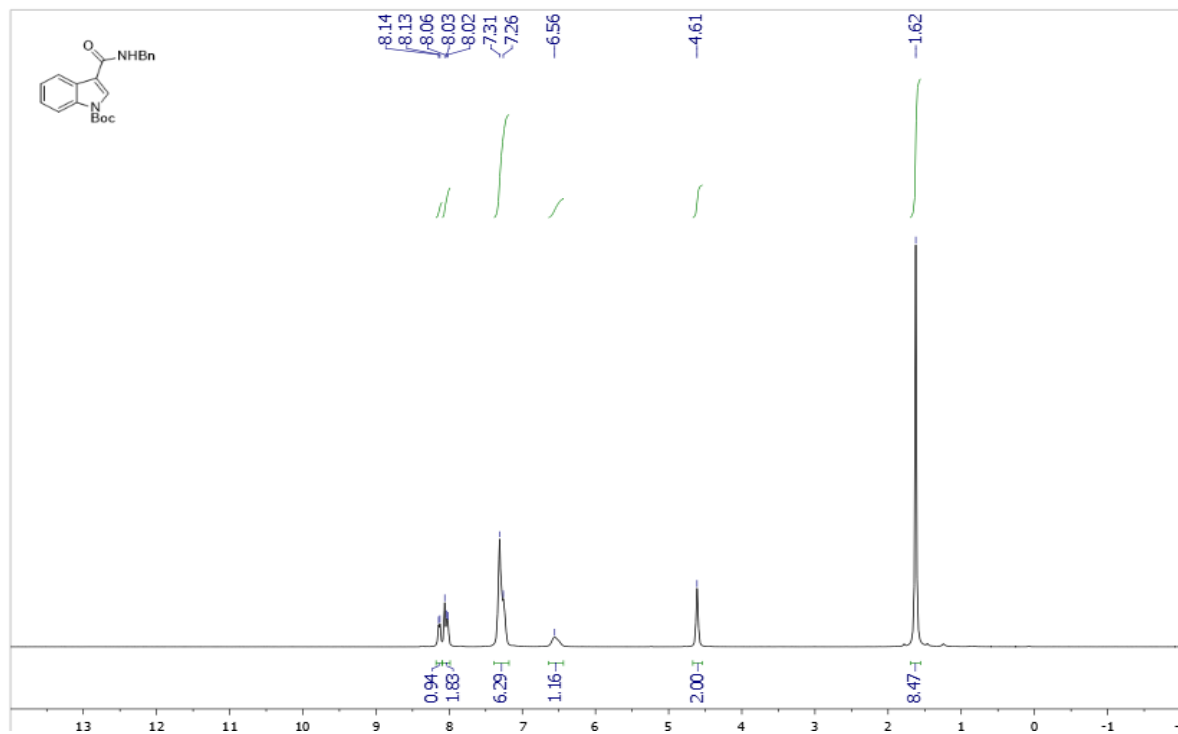

Supplementary Figure 3.  $^1\text{H}$  NMR spectra of 1c

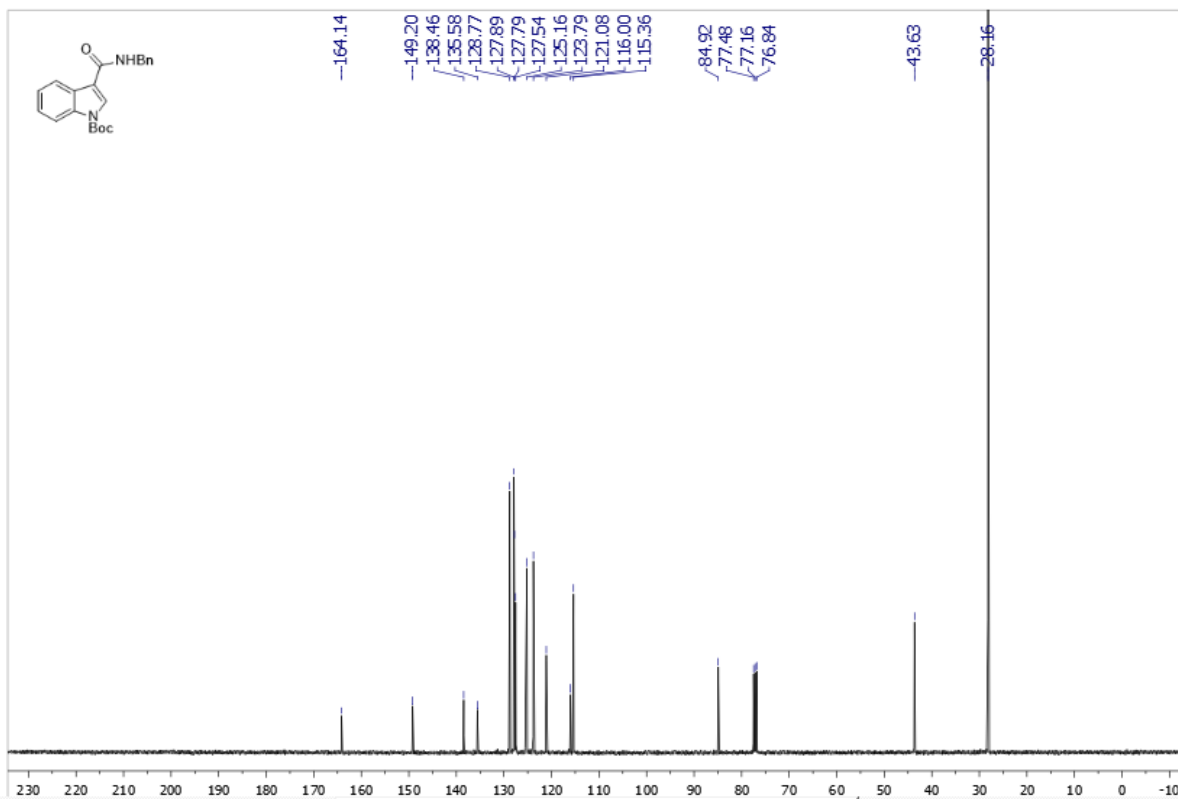

Supplementary Figure 4.  $^{13}\text{C}$  NMR spectra of **1c**

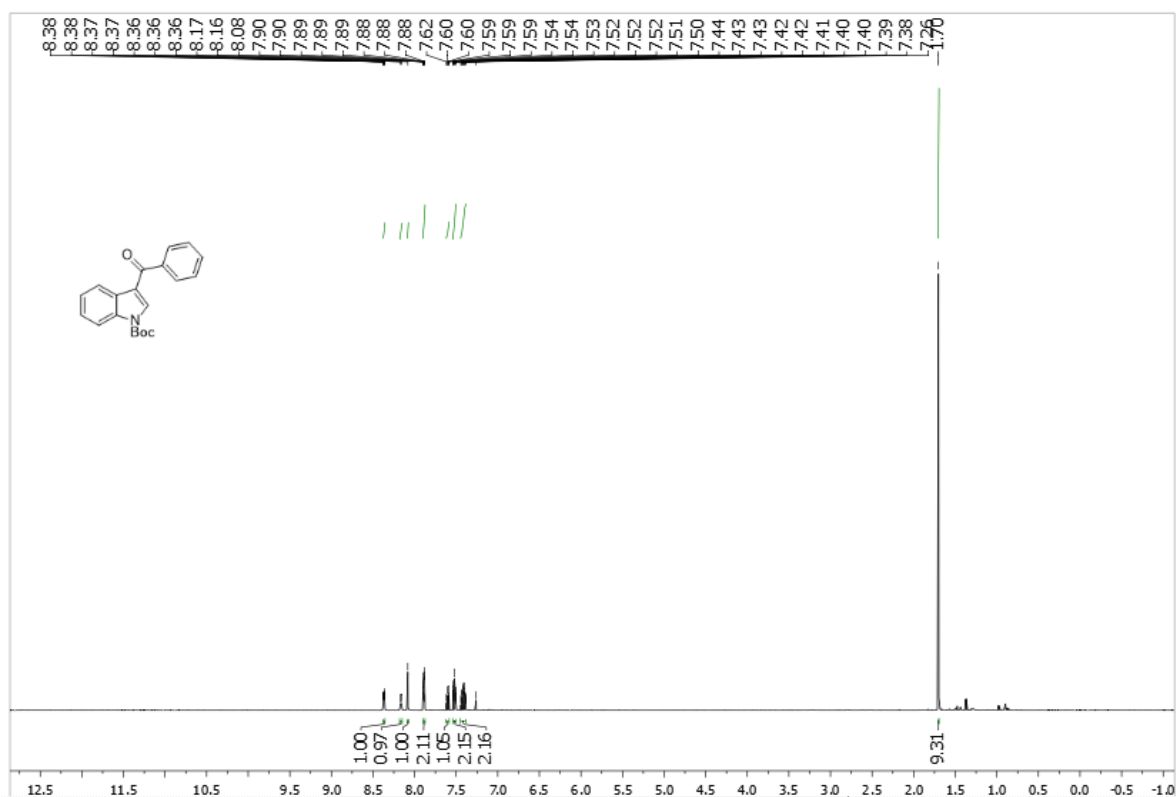

Supplementary Figure 5.  $^1\text{H}$  NMR spectra of **1e**

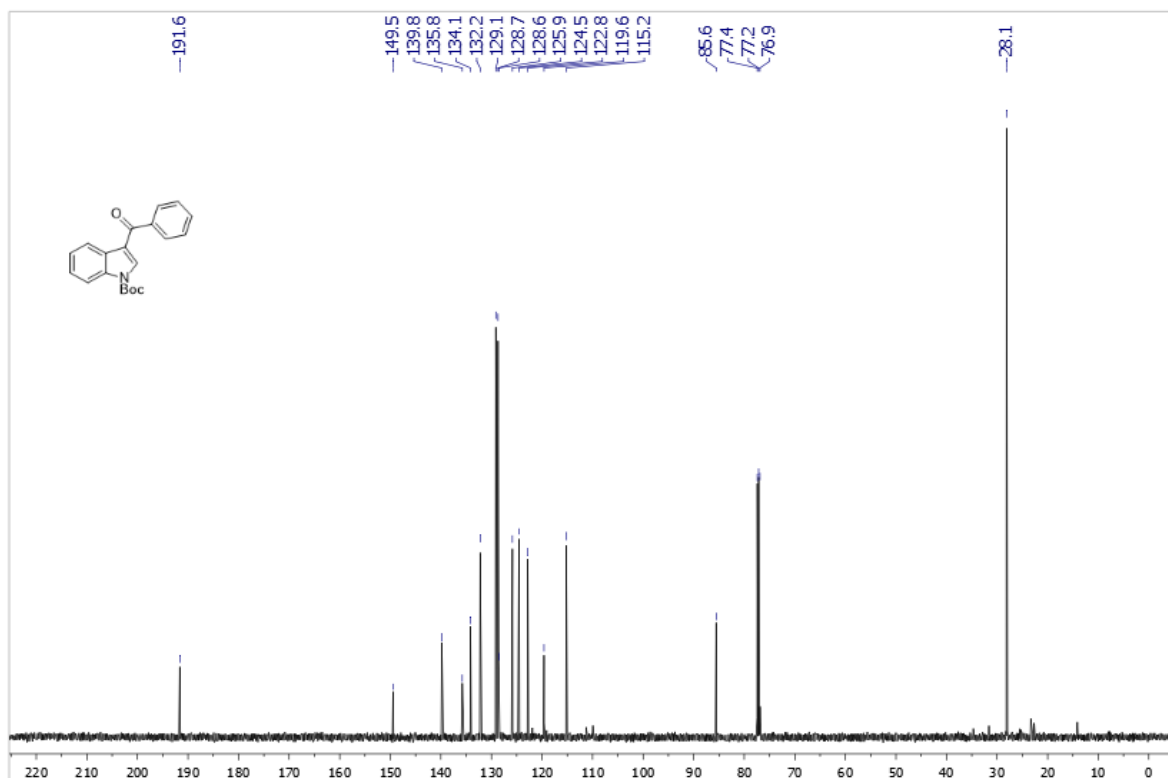

Supplementary Figure 6.  $^{13}\text{C}$  NMR spectra of **1e**

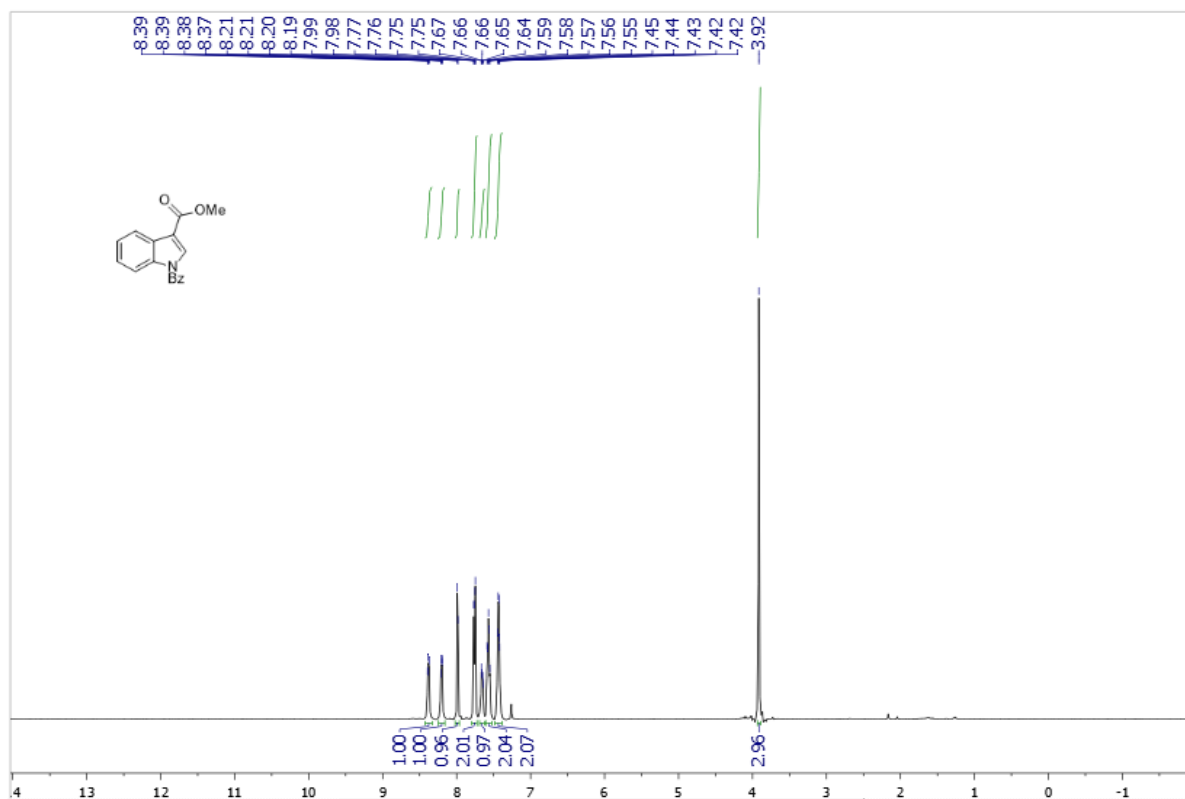

Supplementary Figure 7.  $^1\text{H}$  NMR spectra of **1i**

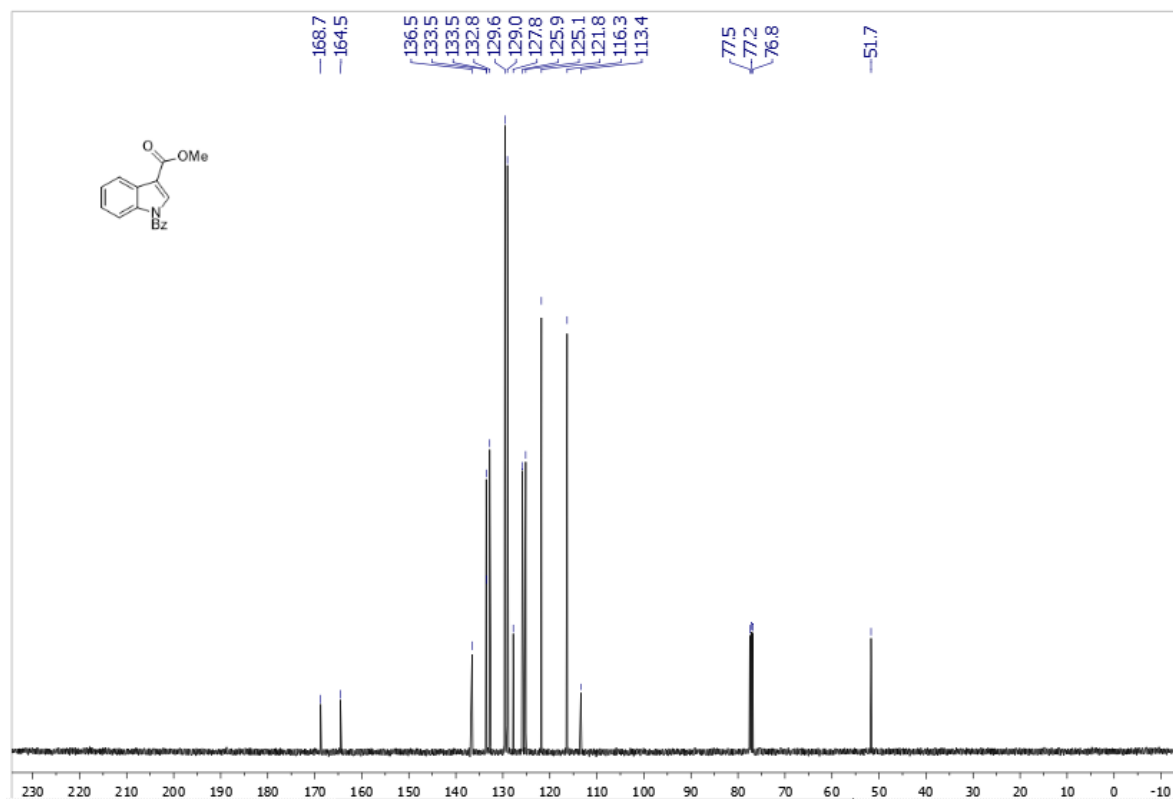

Supplementary Figure 8.  $^{13}\text{C}$  NMR spectra of **1i**

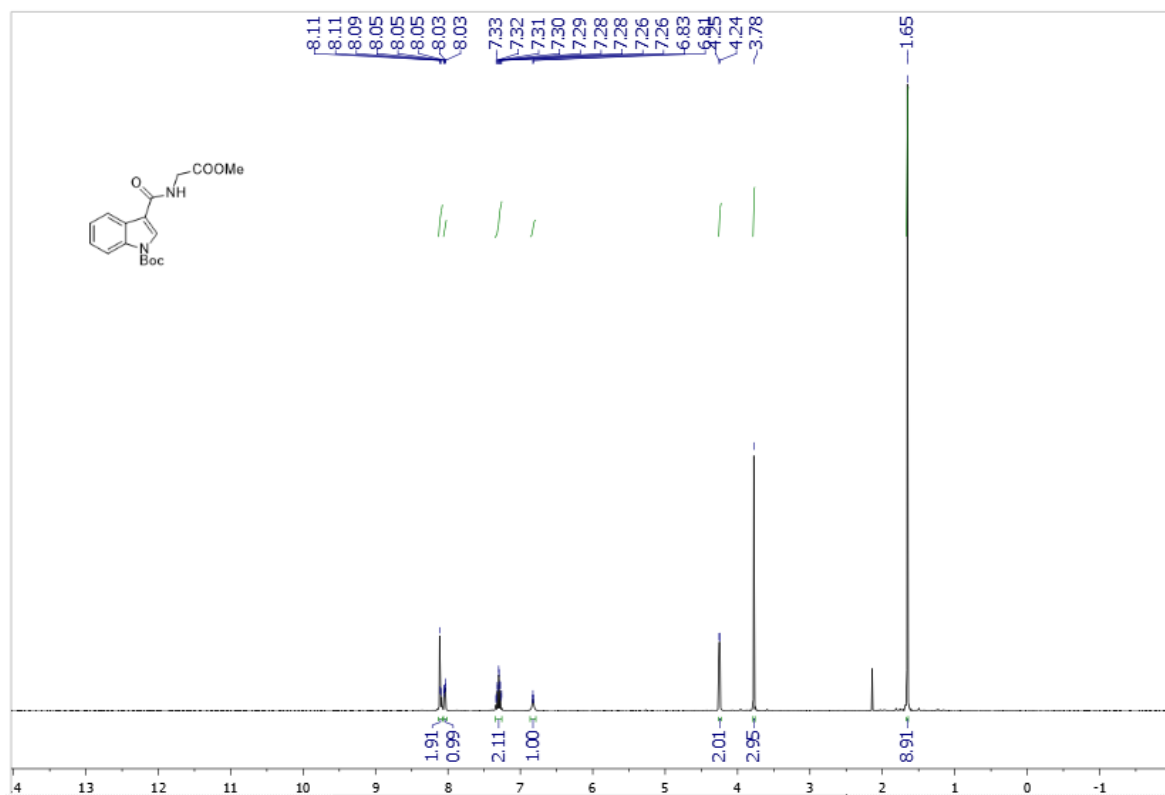

Supplementary Figure 9.  $^1\text{H}$  NMR spectra of **1g**

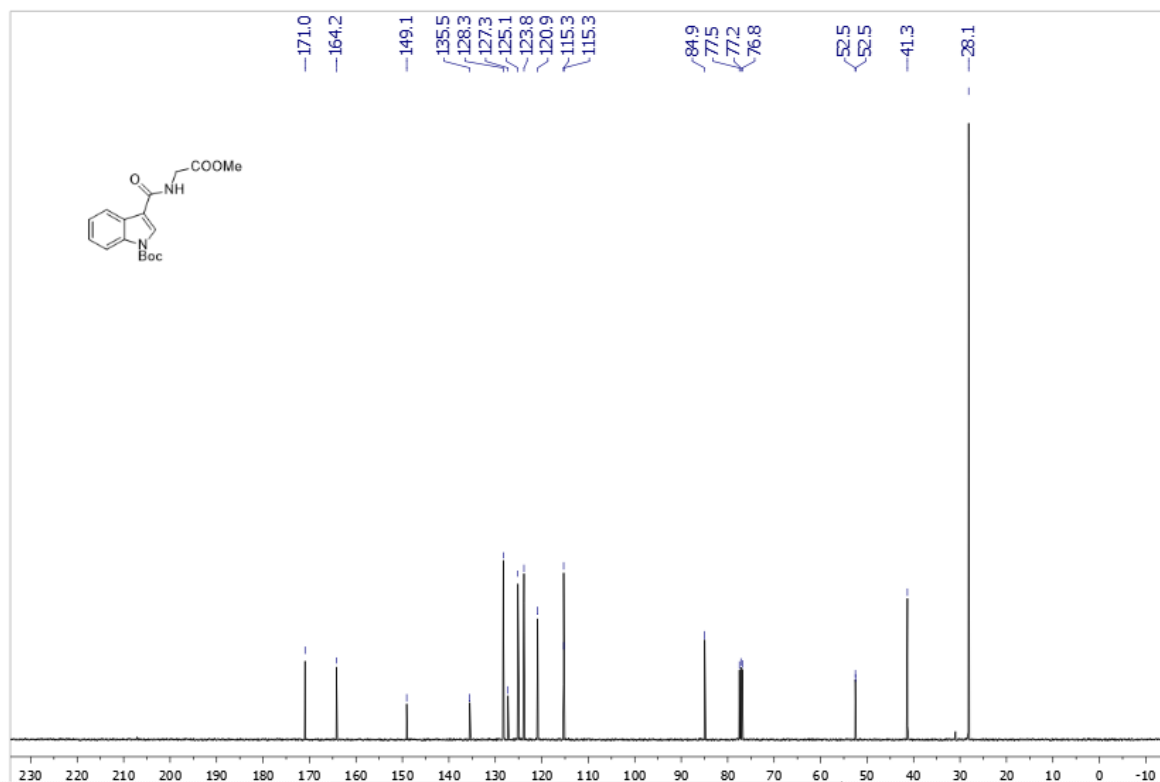

Supplementary Figure 10.  $^{13}\text{C}$  NMR spectra of **1g**

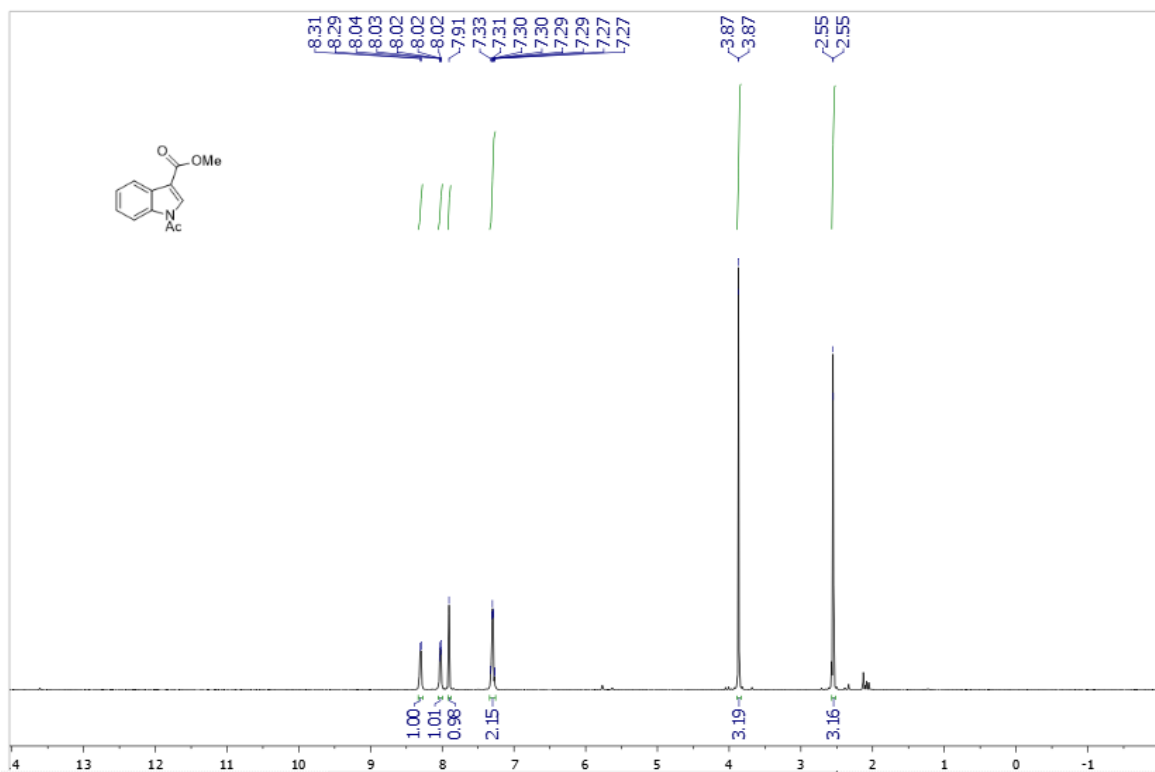

Supplementary Figure 11.  $^1\text{H}$  NMR spectra of **1j**

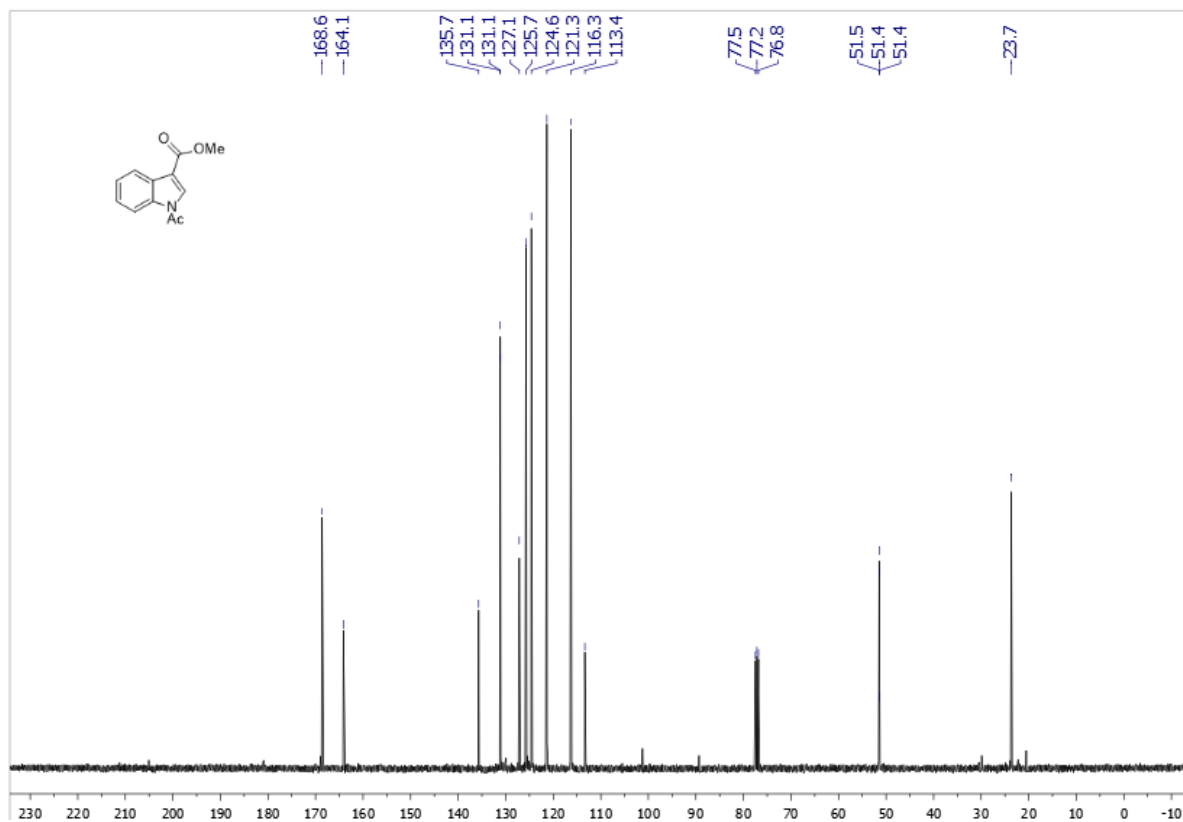

Supplementary Figure 12.  $^{13}\text{C}$  NMR spectra of **1j**

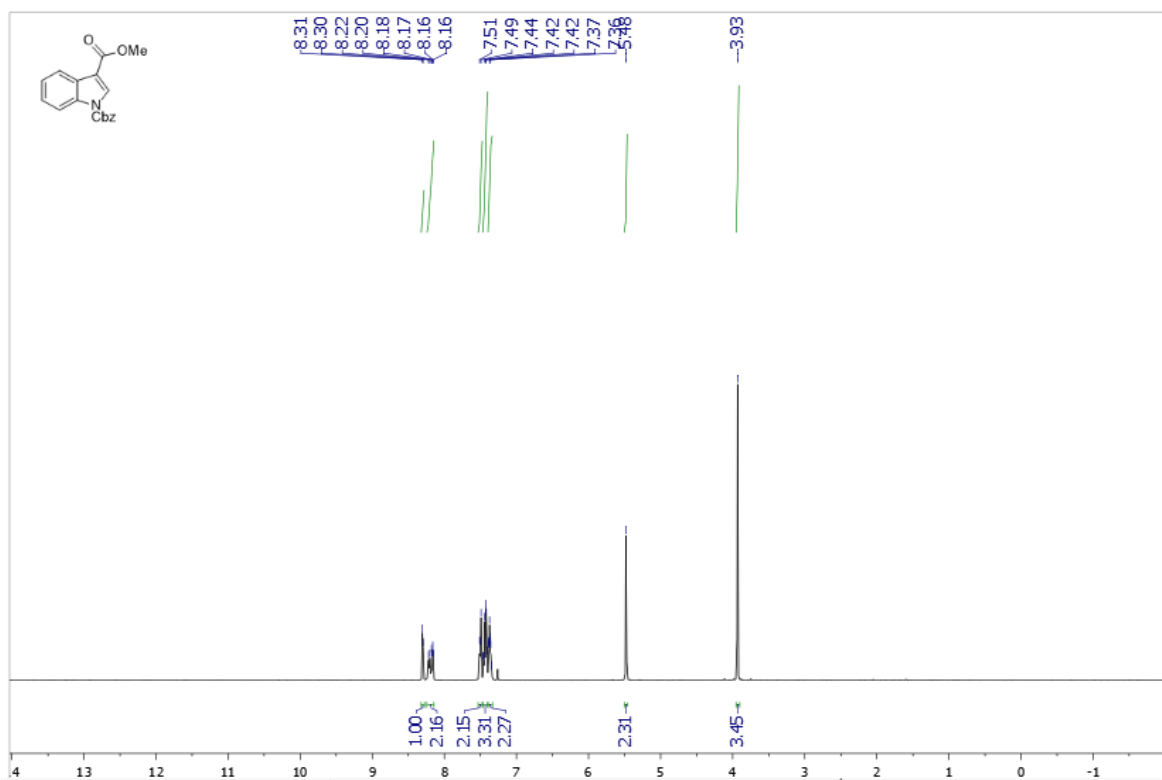

Supplementary Figure 13.  $^1\text{H}$  NMR spectra of **1k**

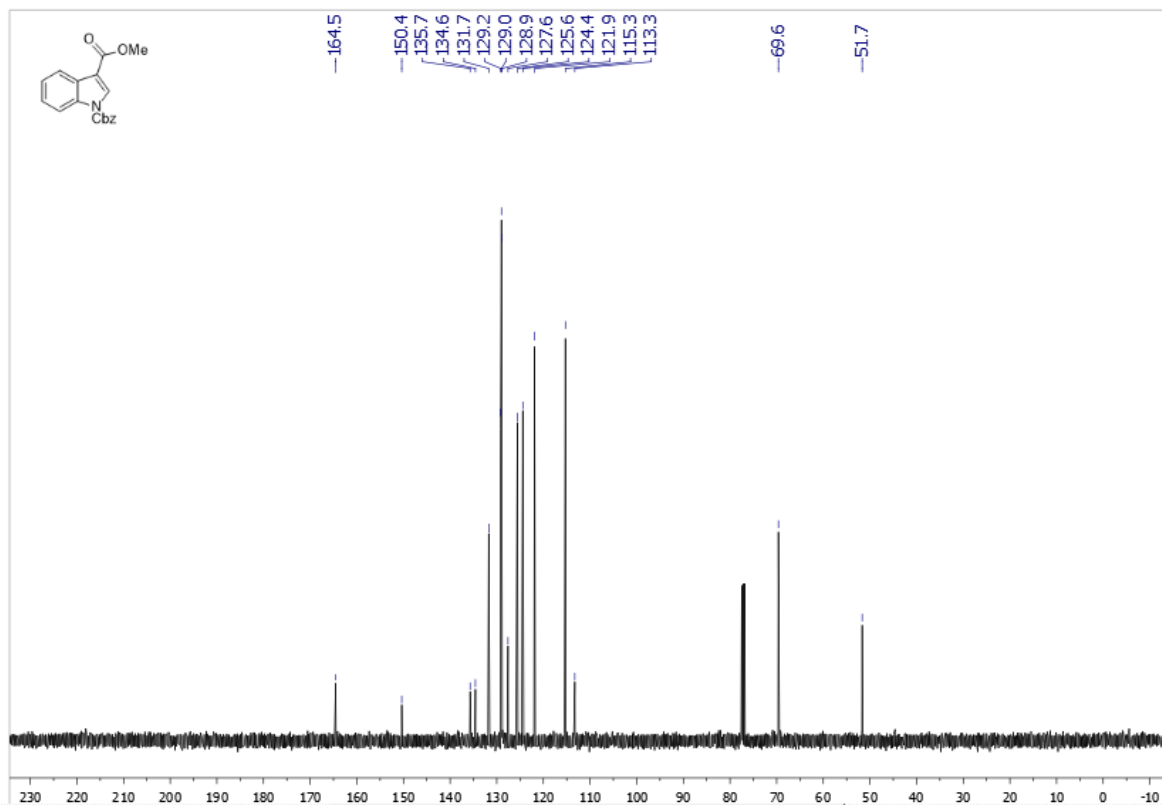

Supplementary Figure 14.  $^{13}\text{C}$  NMR spectra of **1k**

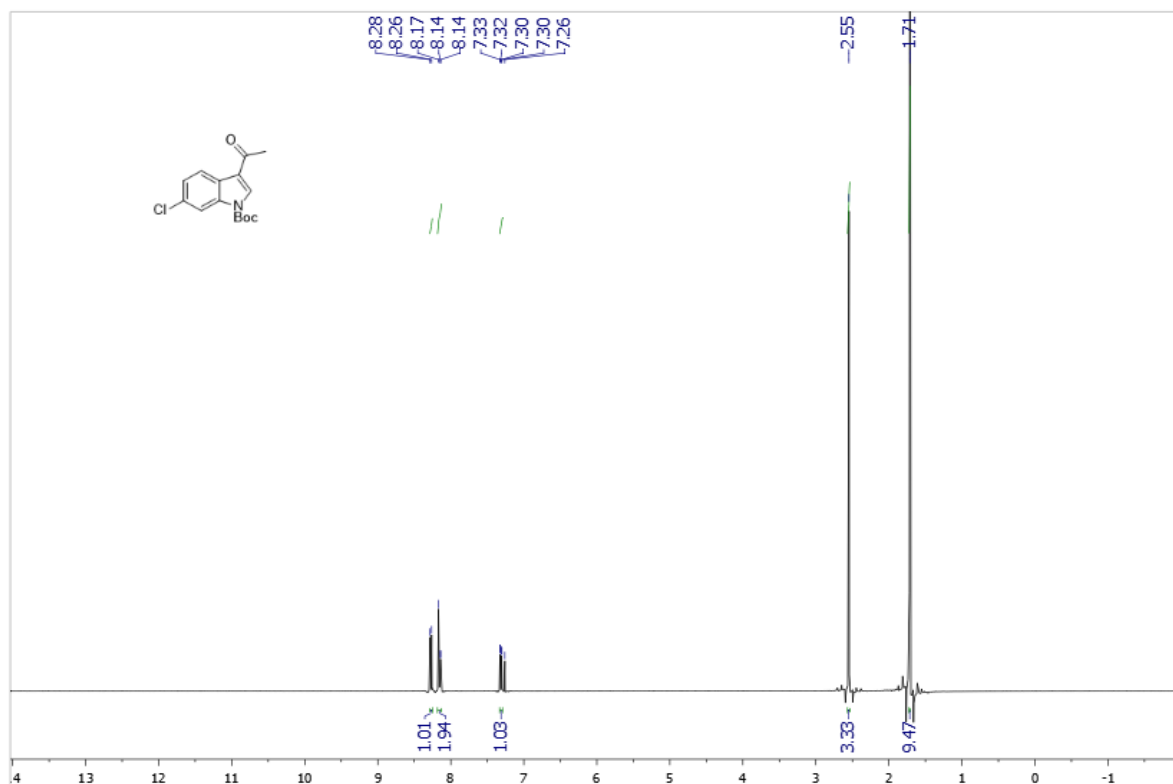

Supplementary Figure 15.  $^1\text{H}$  NMR spectra of **1l**

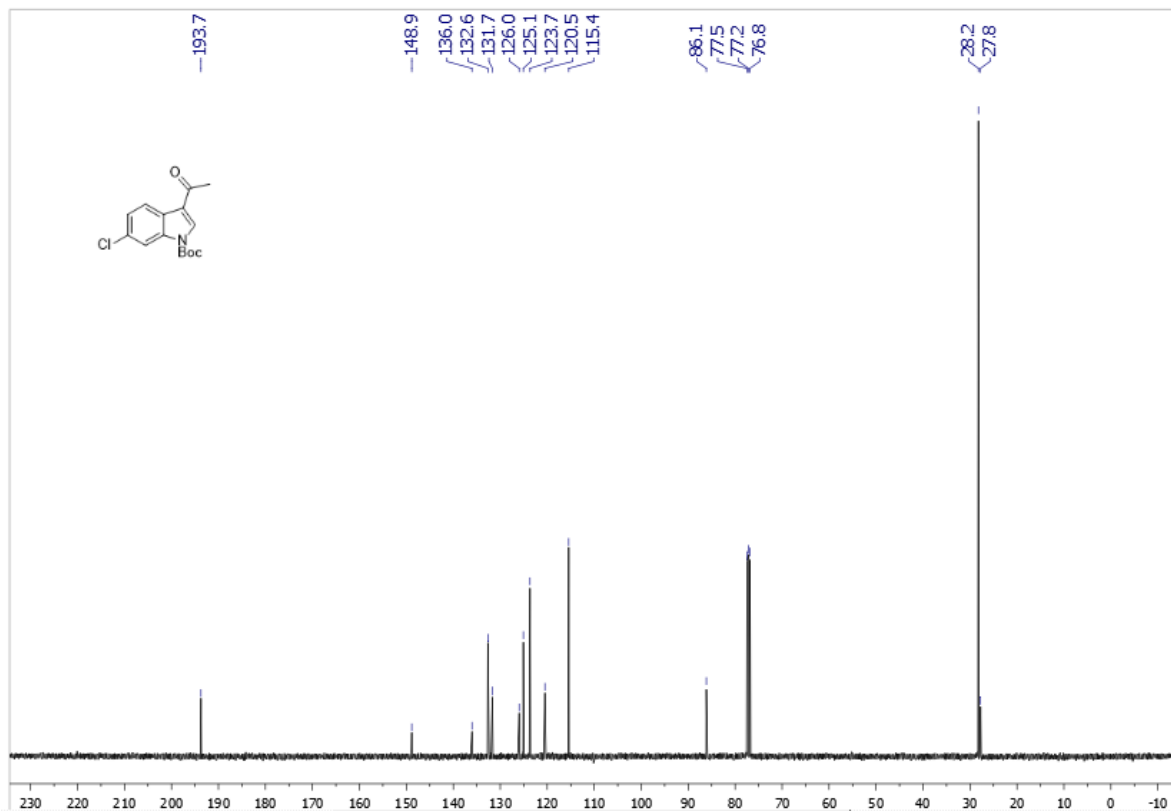

Supplementary Figure 16.  $^{13}\text{C}$  NMR spectra of **1l**

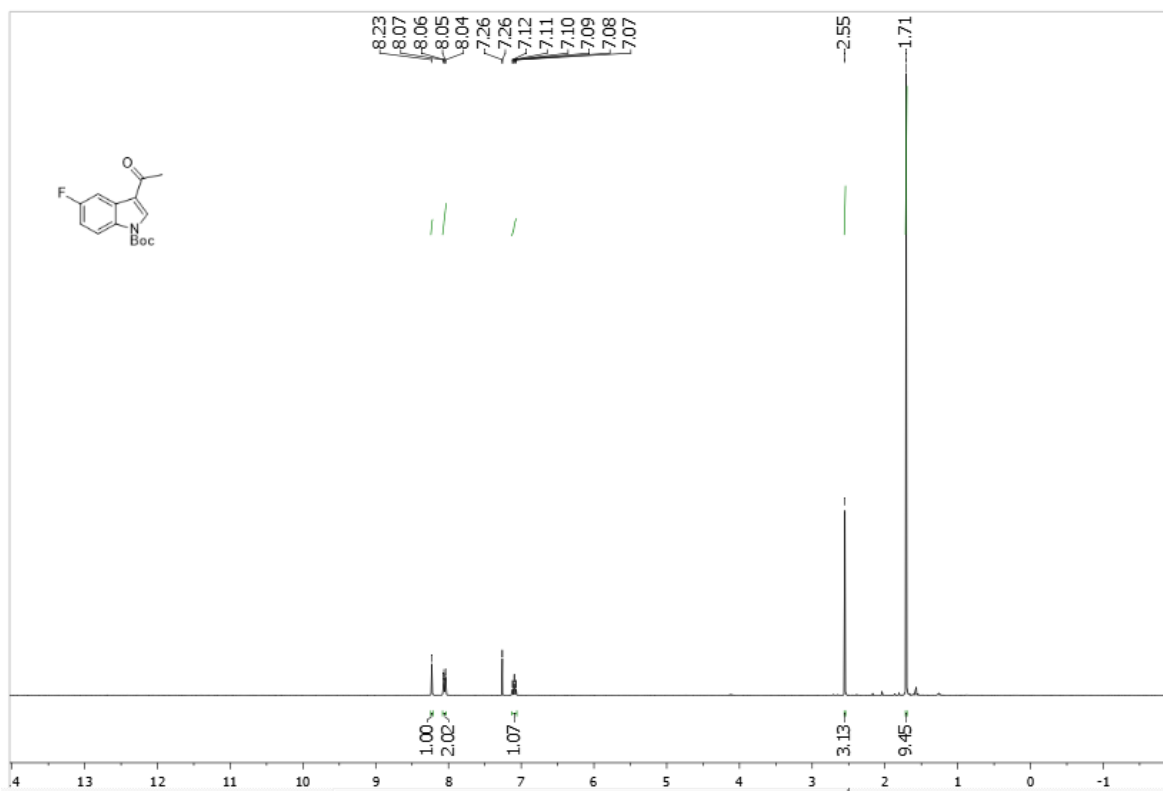

Supplementary Figure 17.  $^1\text{H}$  NMR spectra of **1m**

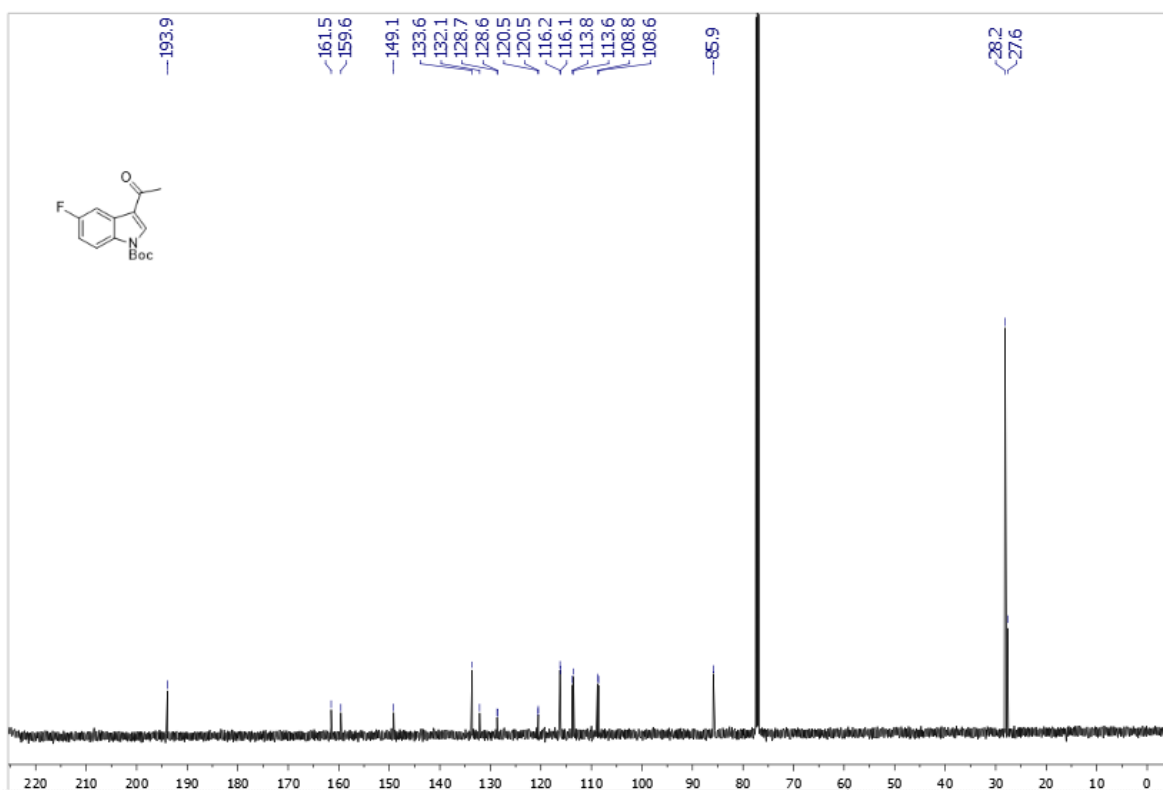



Supplementary Figure 18.  $^{13}\text{C}$  NMR spectra of **1m**

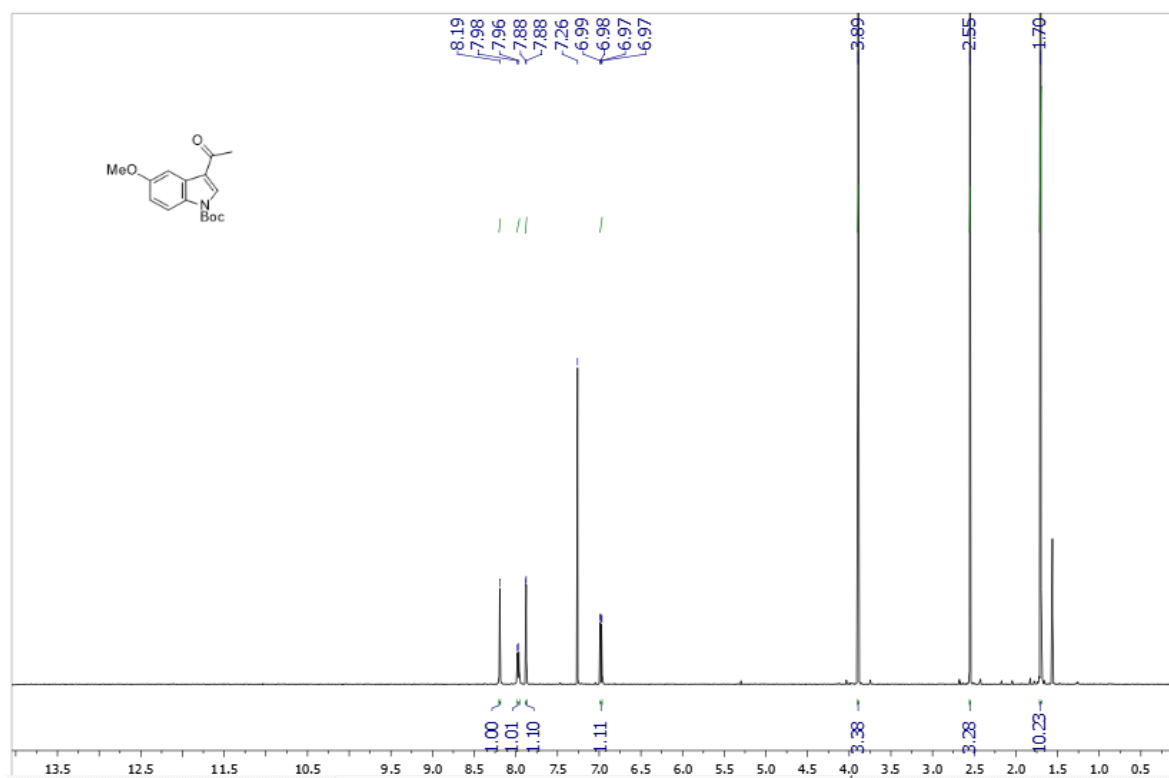

Supplementary Figure 19.  $^1\text{H}$  NMR spectra of **1n**

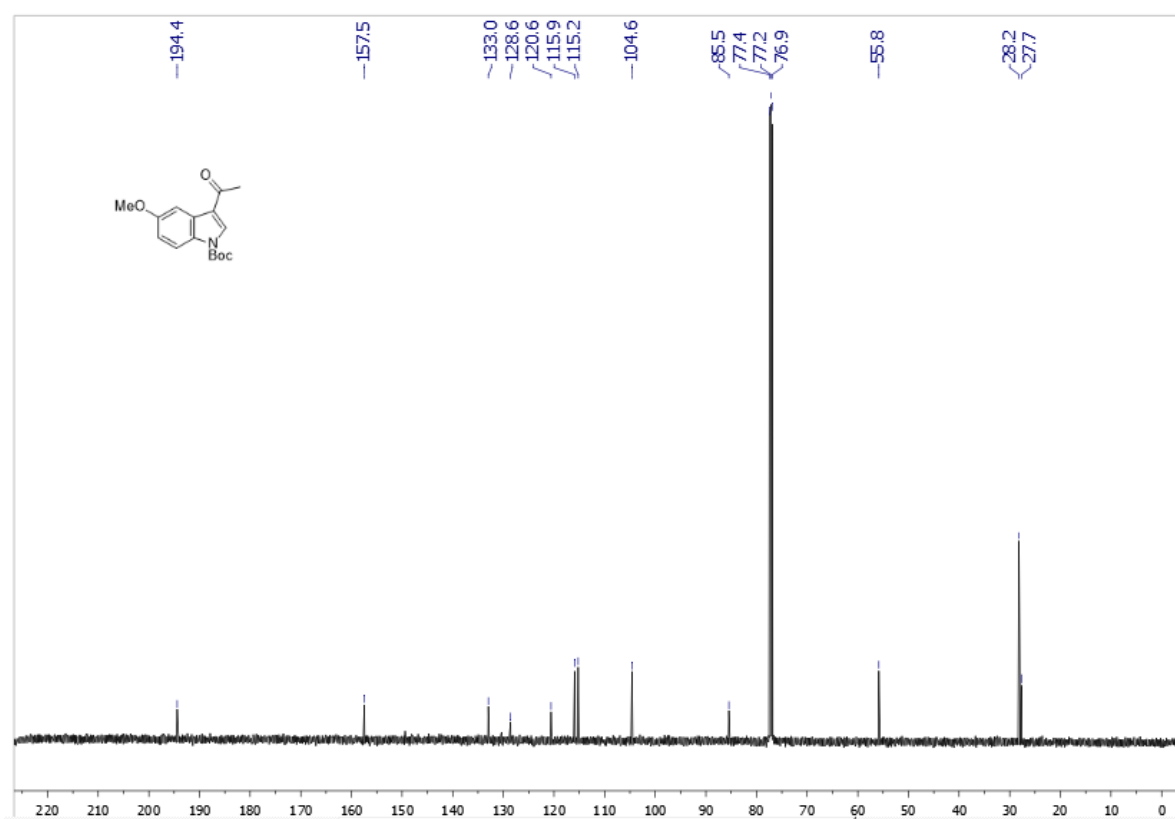

Supplementary Figure 20.  $^{13}\text{C}$  NMR spectra of **1n**

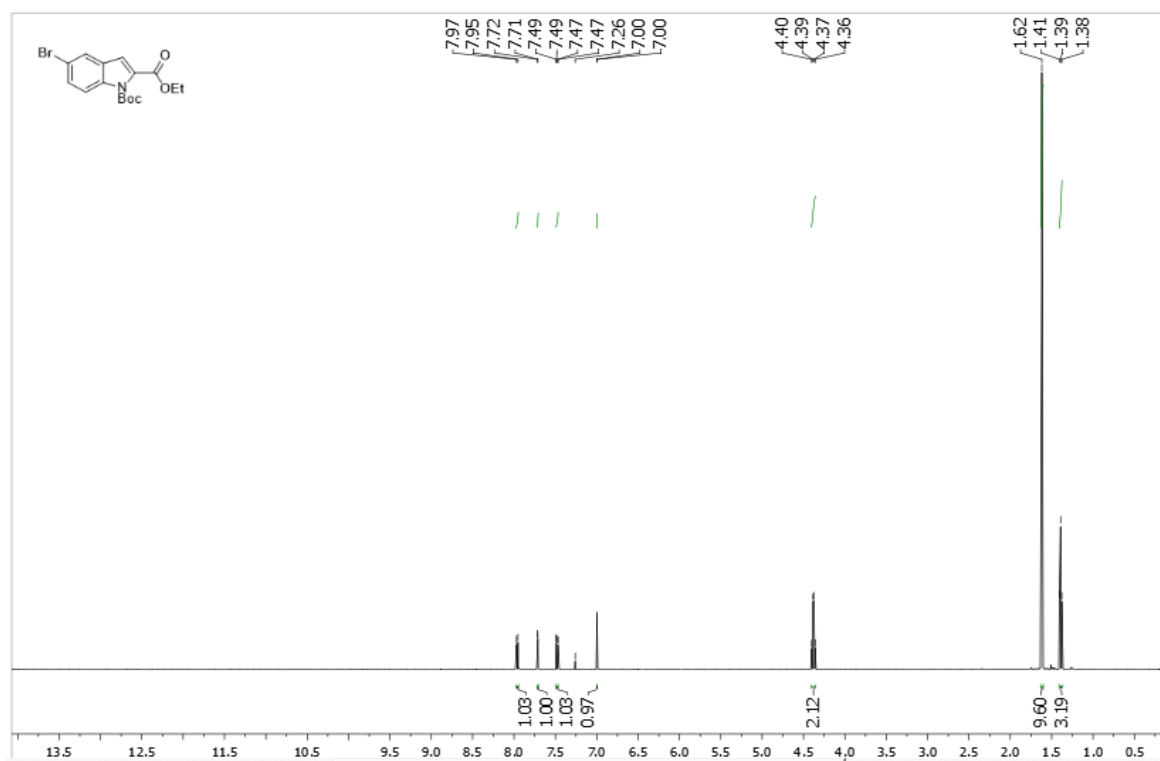

Supplementary Figure 21.  $^1\text{H}$  NMR spectra of **1r**

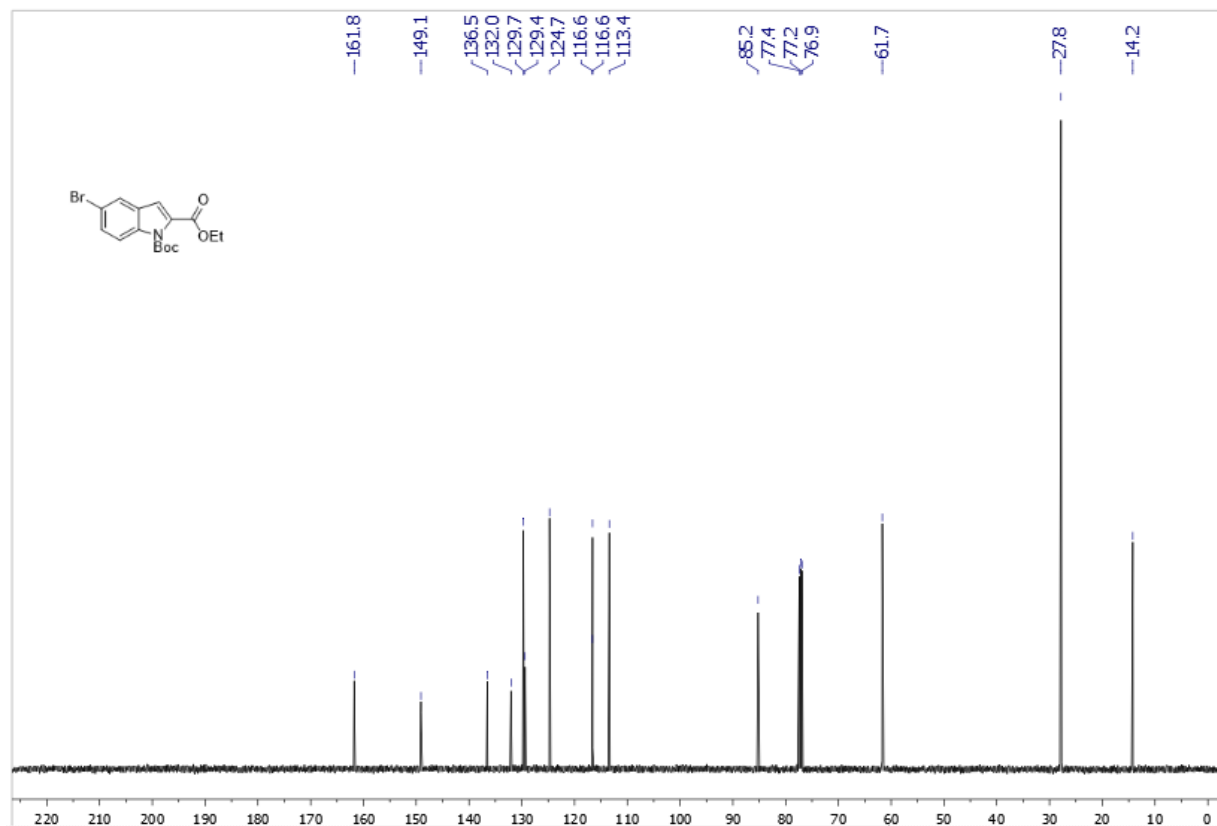

Supplementary Figure 22.  $^{13}\text{C}$  NMR spectra of **1r**

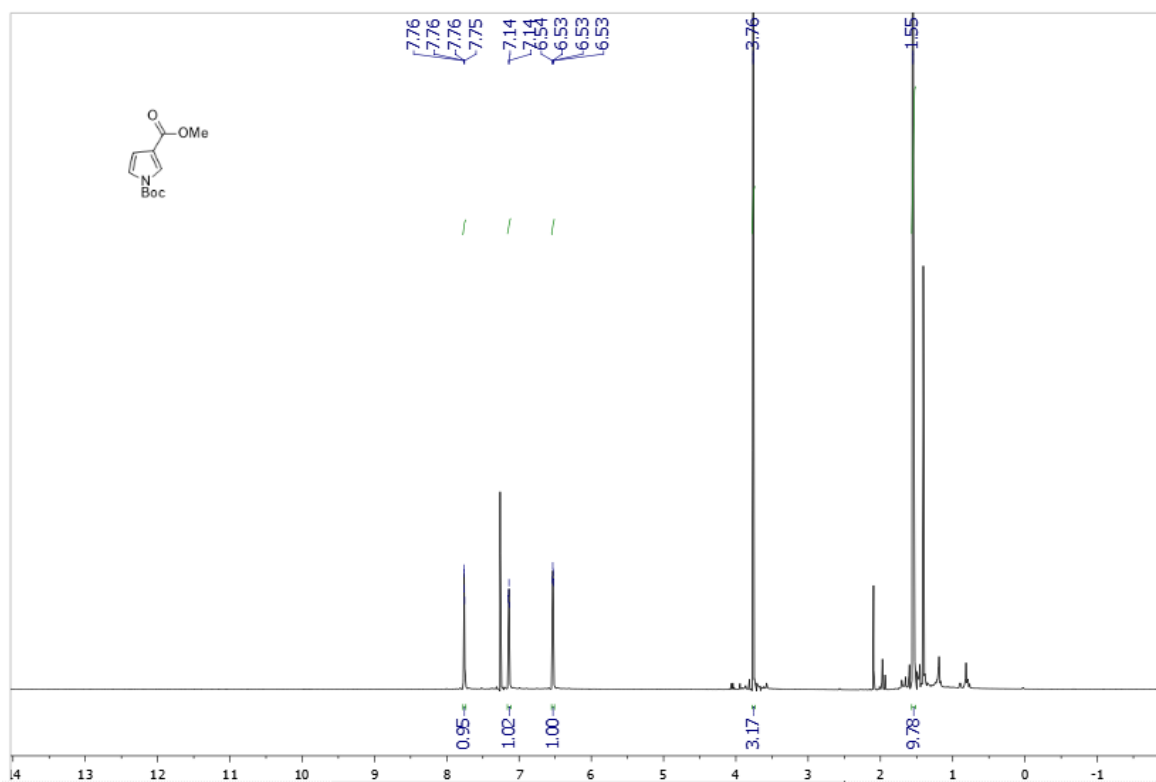

Supplementary Figure 23.  $^1\text{H}$  NMR spectra of **1s**

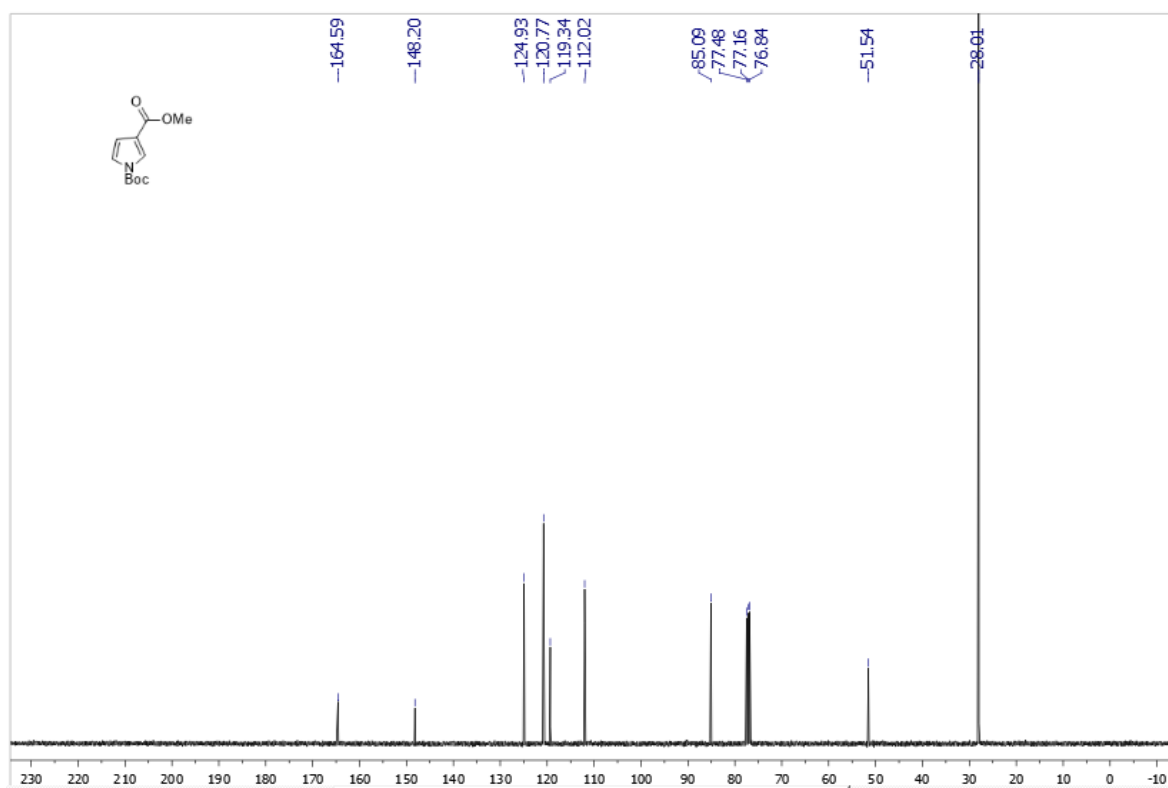

Supplementary Figure 24.  $^{13}\text{C}$  NMR spectra of **1s**

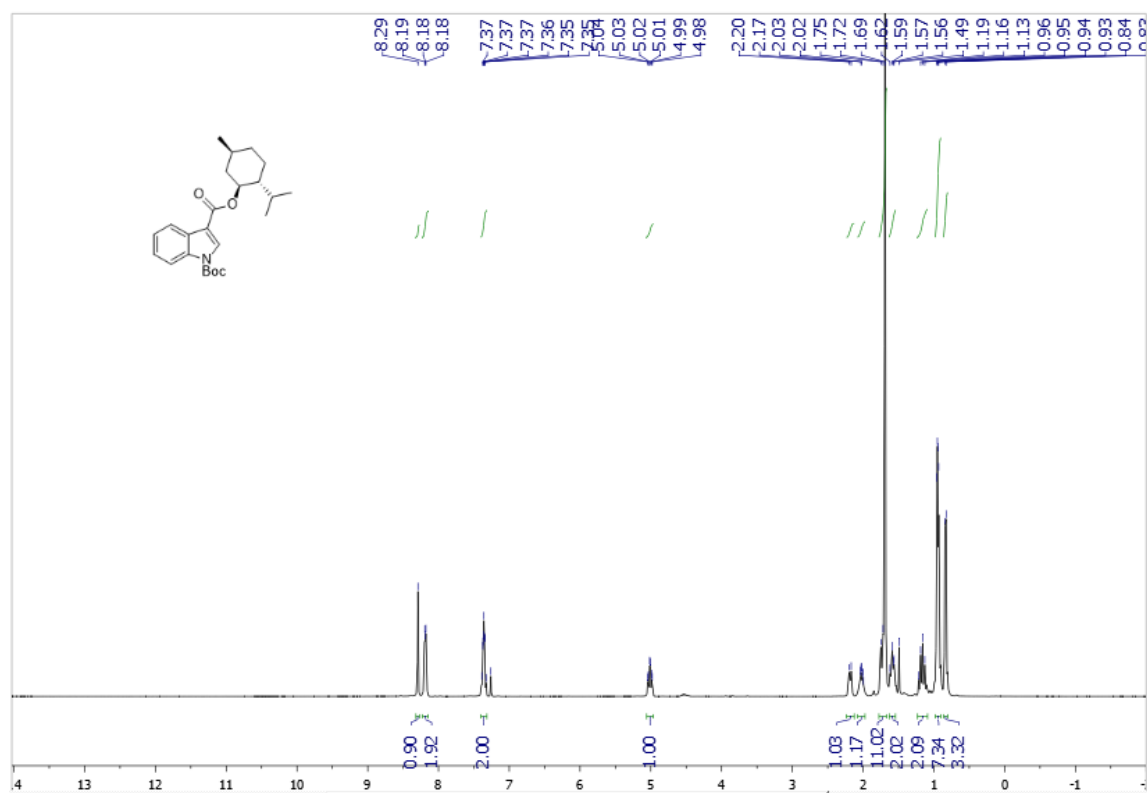

Supplementary Figure 25.  $^1\text{H}$  NMR spectra of **1s**

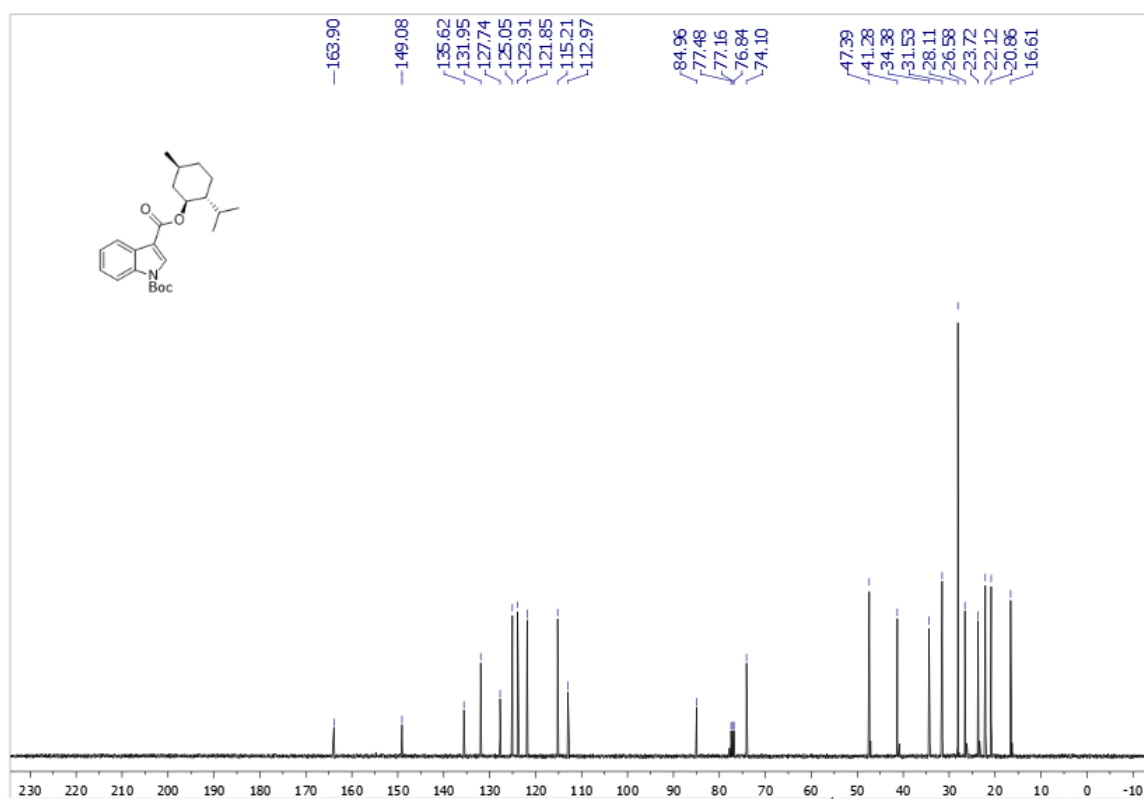

Supplementary Figure 26.  $^{13}\text{C}$  NMR spectra of **1a**s

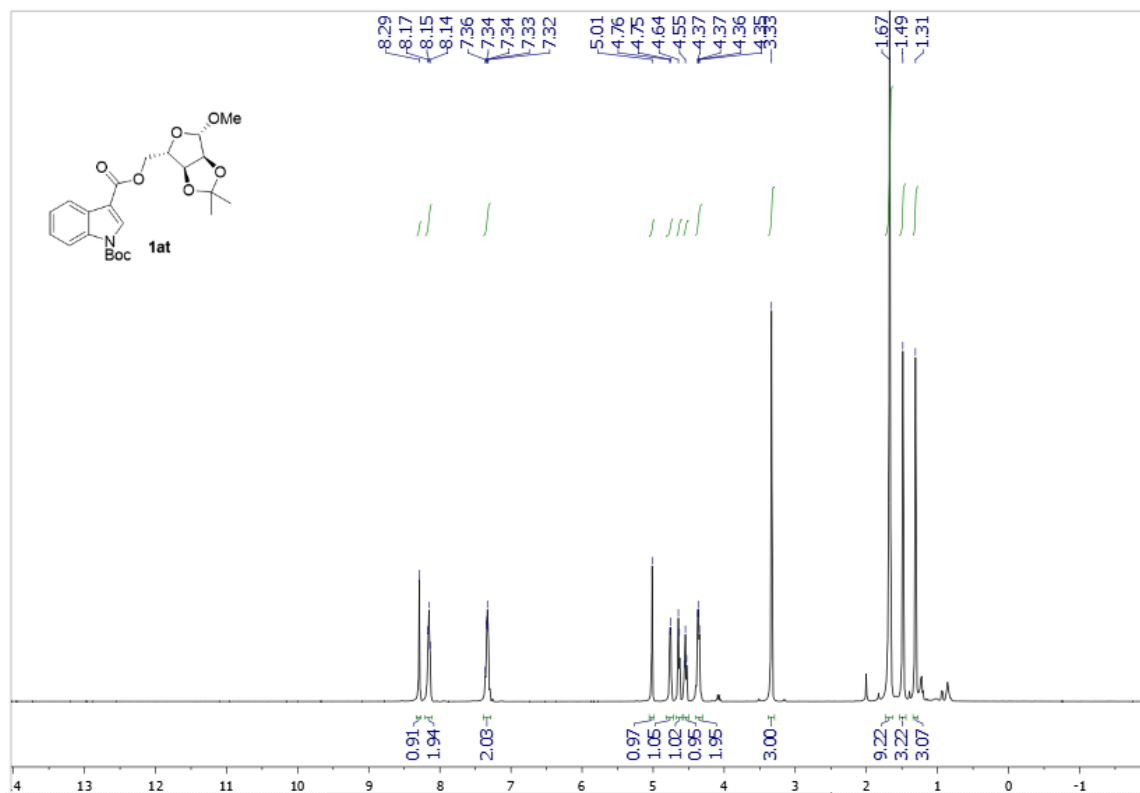

Supplementary Figure 27.  $^1\text{H}$  NMR spectra of **1a**t

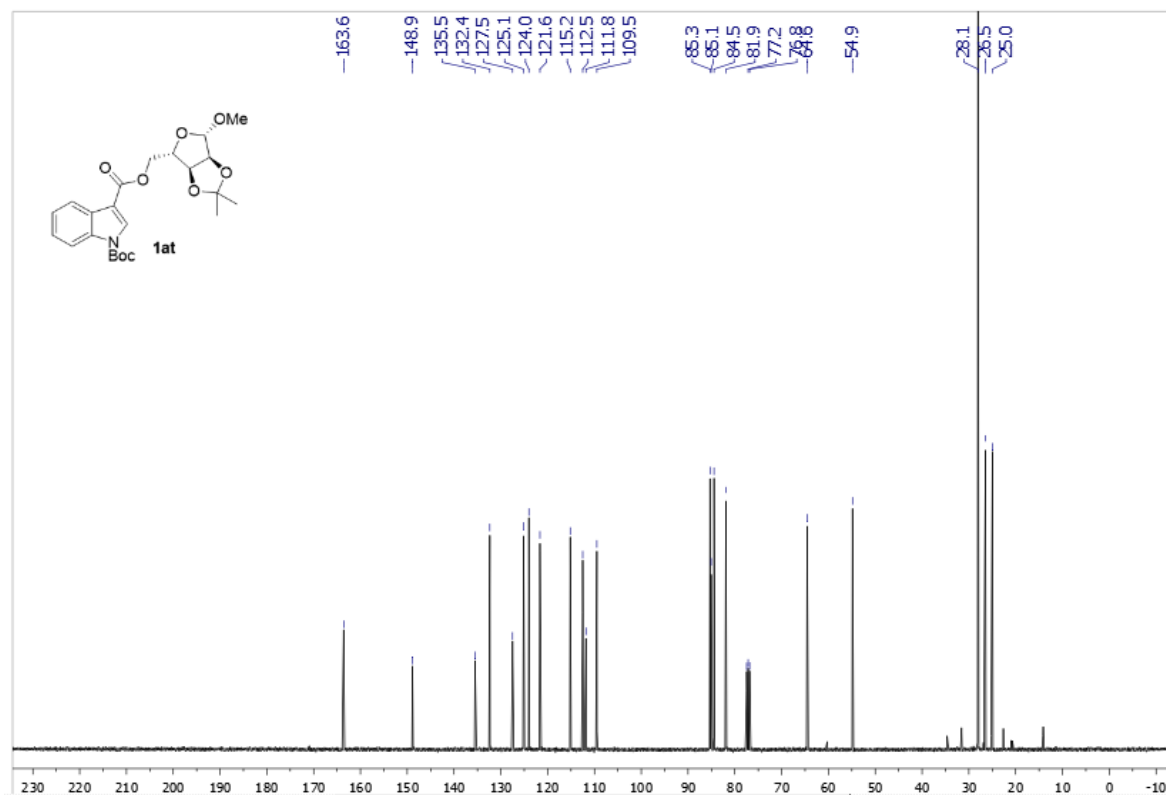

Supplementary Figure 28.  $^{13}\text{C}$  NMR spectra of **1at**

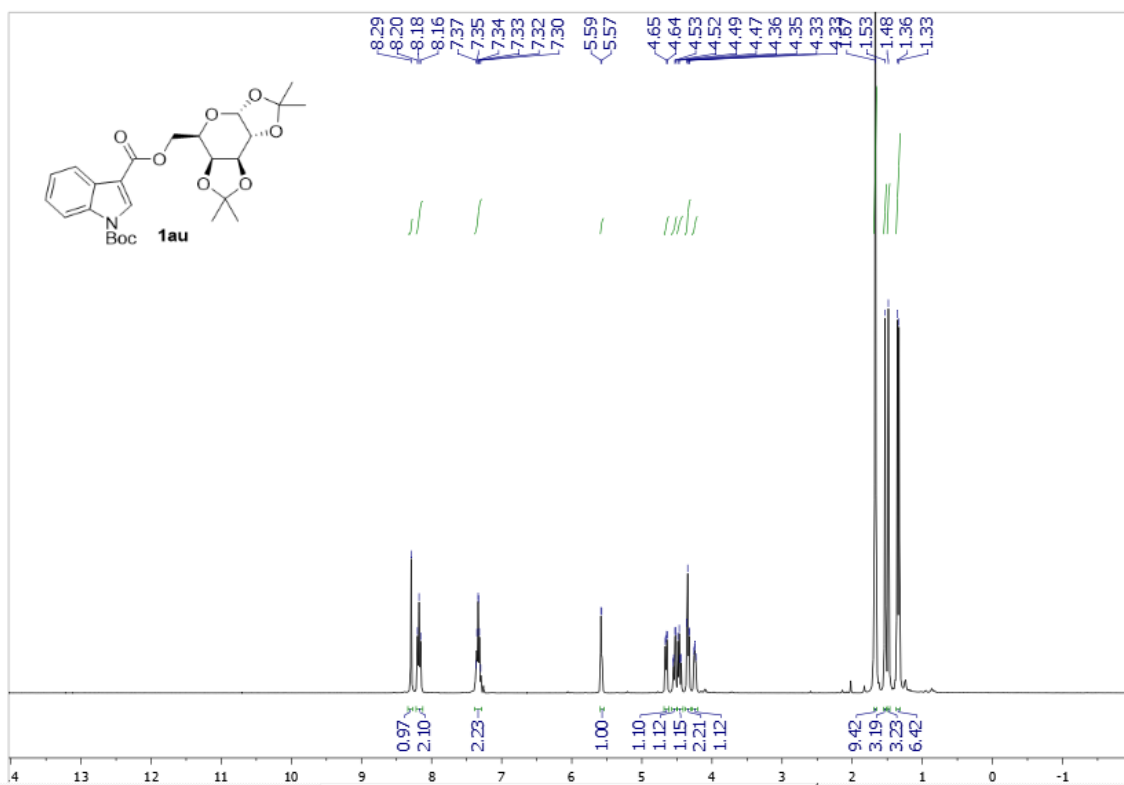

Supplementary Figure 29.  $^1\text{H}$  NMR spectra of **1au**

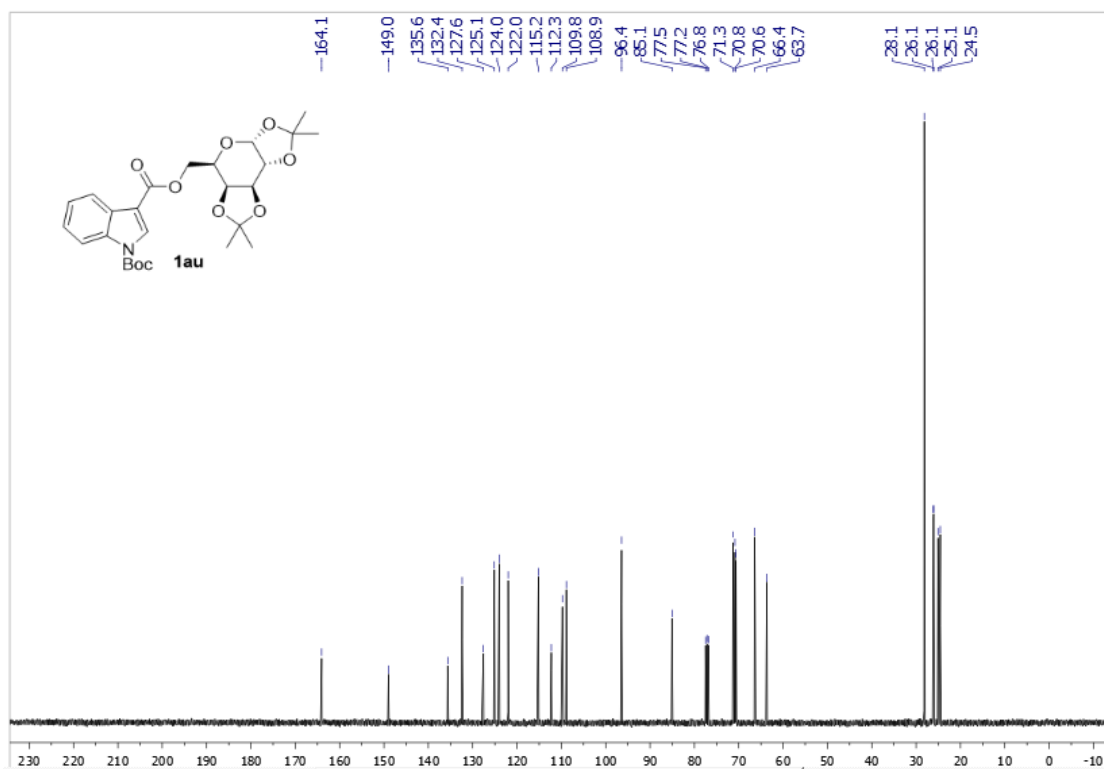

Supplementary Figure 30.  $^{13}\text{C}$  NMR spectra of **1au**

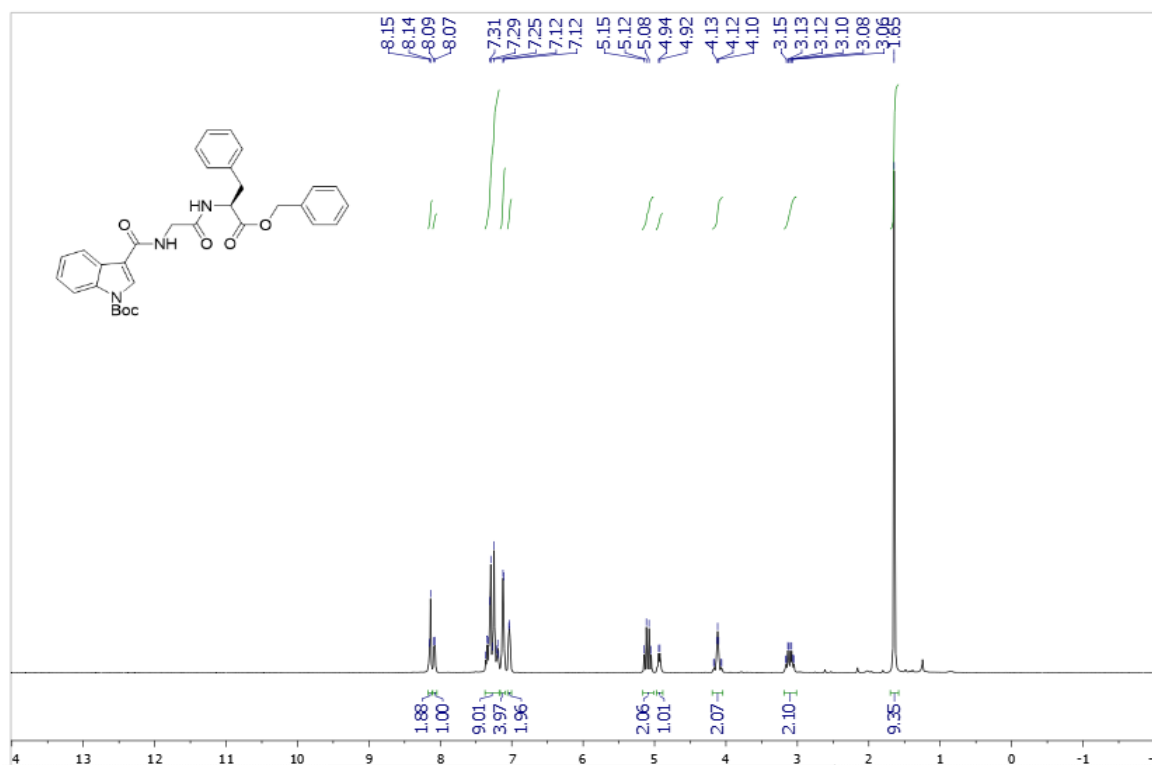

Supplementary Figure 31.  $^1\text{H}$  NMR spectra of **1av**

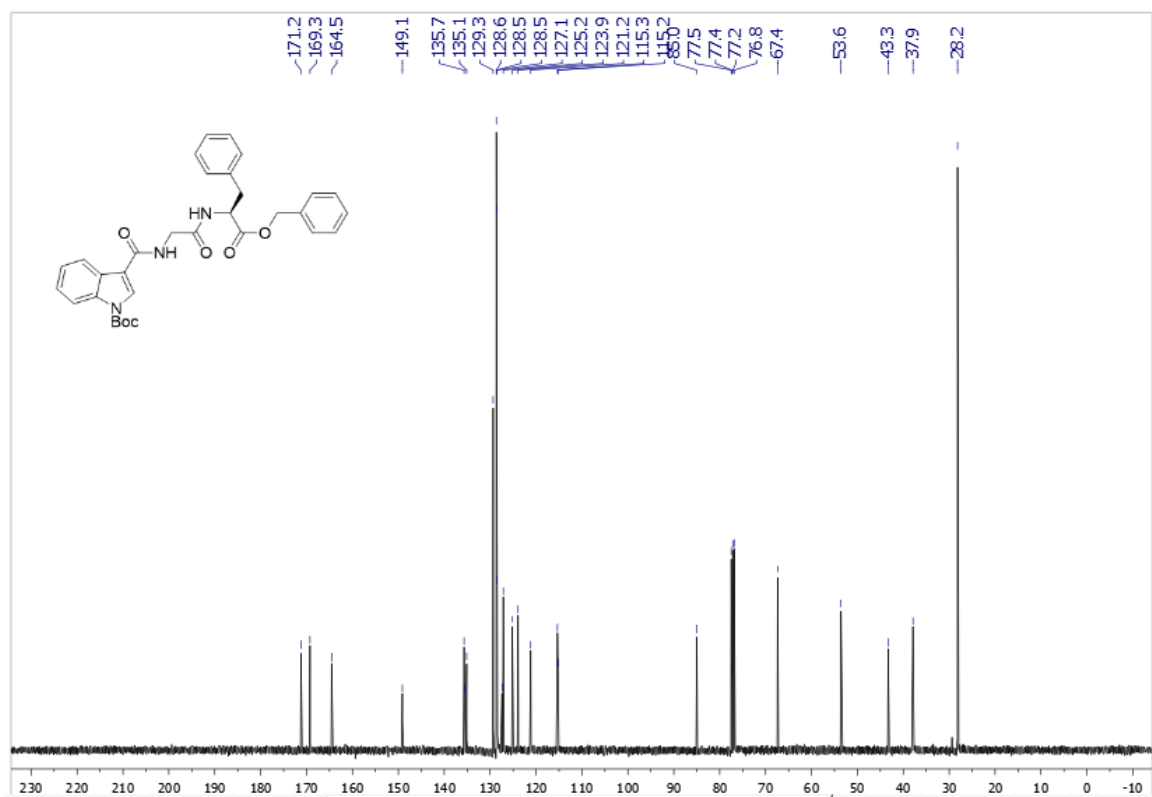

Supplementary Figure 32.  $^{13}\text{C}$  NMR spectra of **1av**

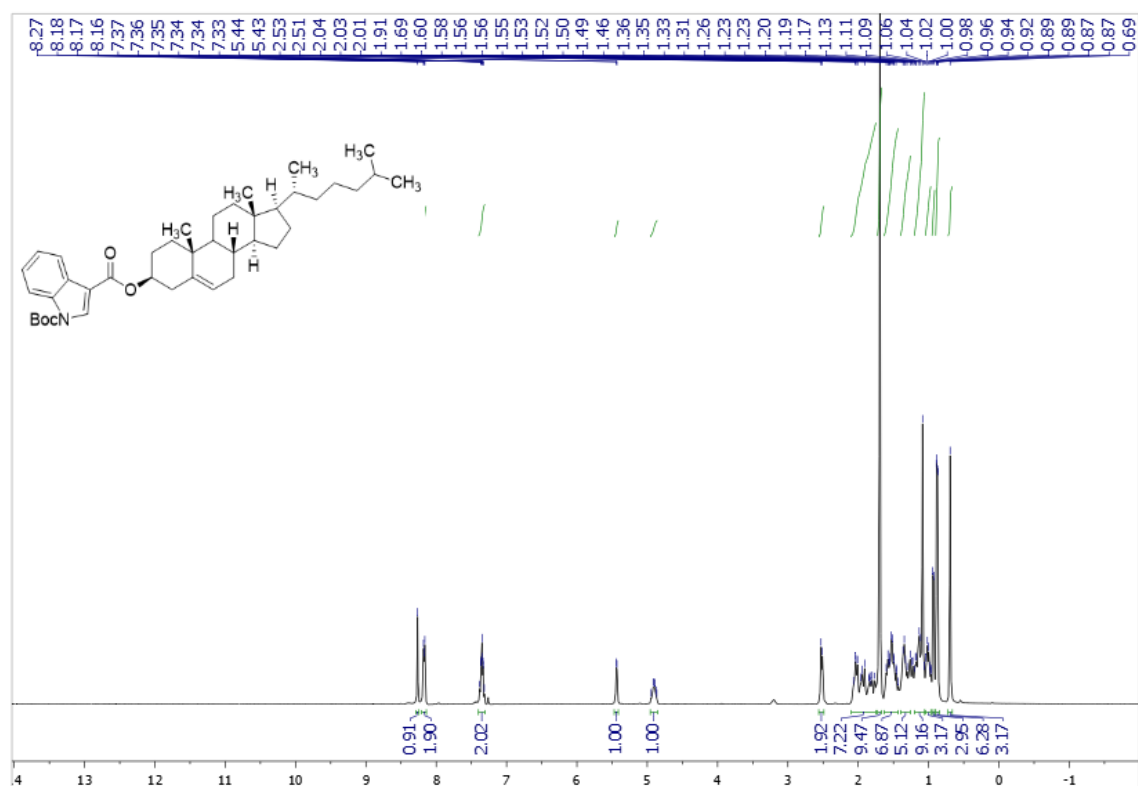

Supplementary Figure 33.  $^1\text{H}$  NMR spectra of **1av**

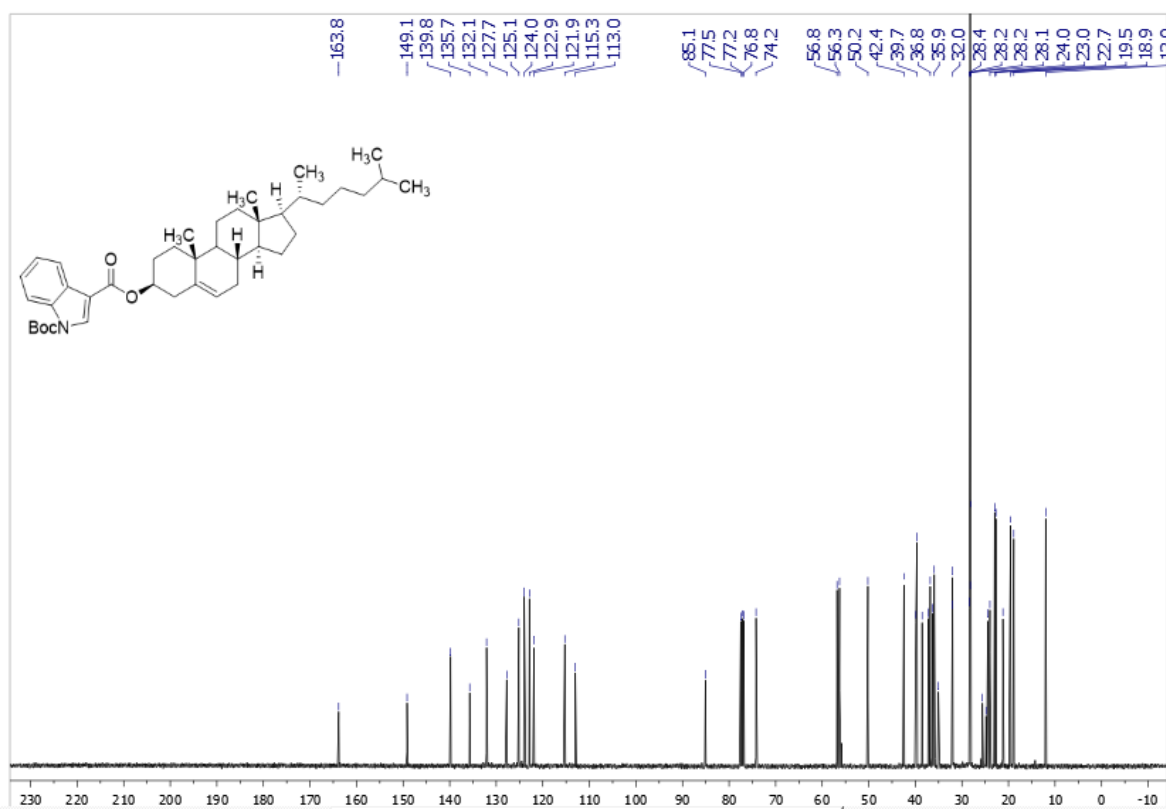



Supplementary Figure 34.  $^{13}\text{C}$  NMR spectra of **1aw**

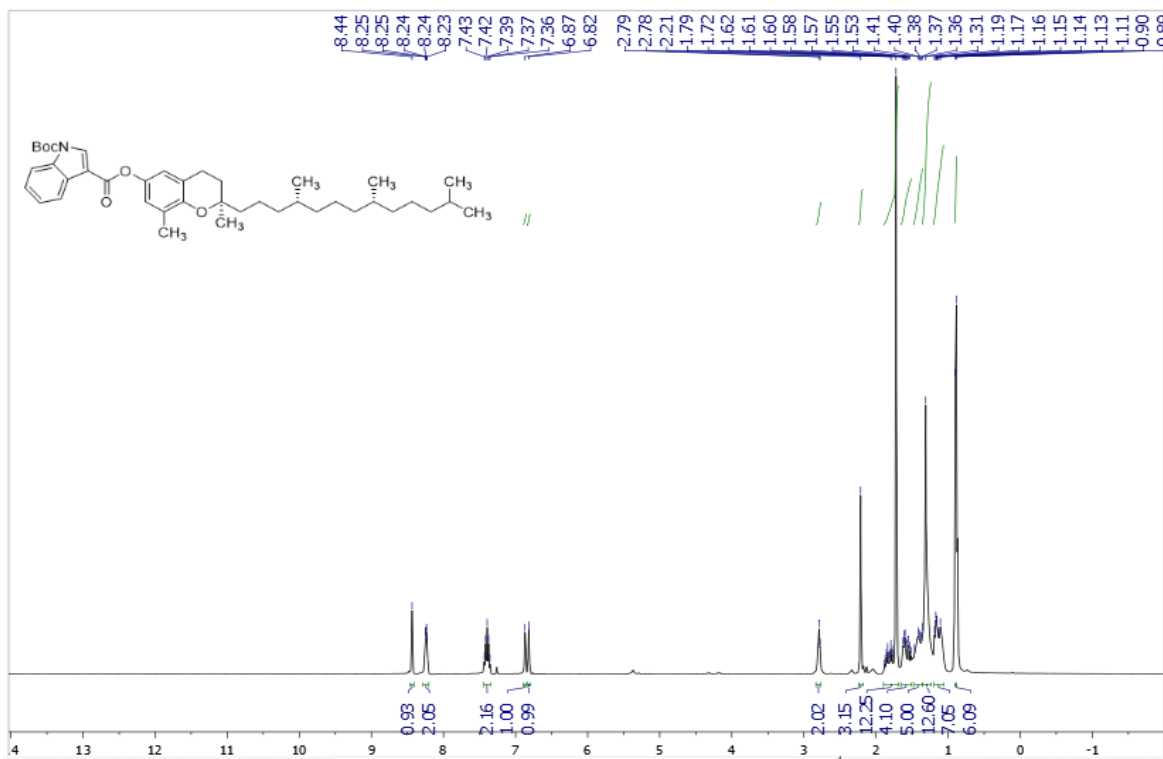

Supplementary Figure 35.  $^1\text{H}$  NMR spectra of **1ax**

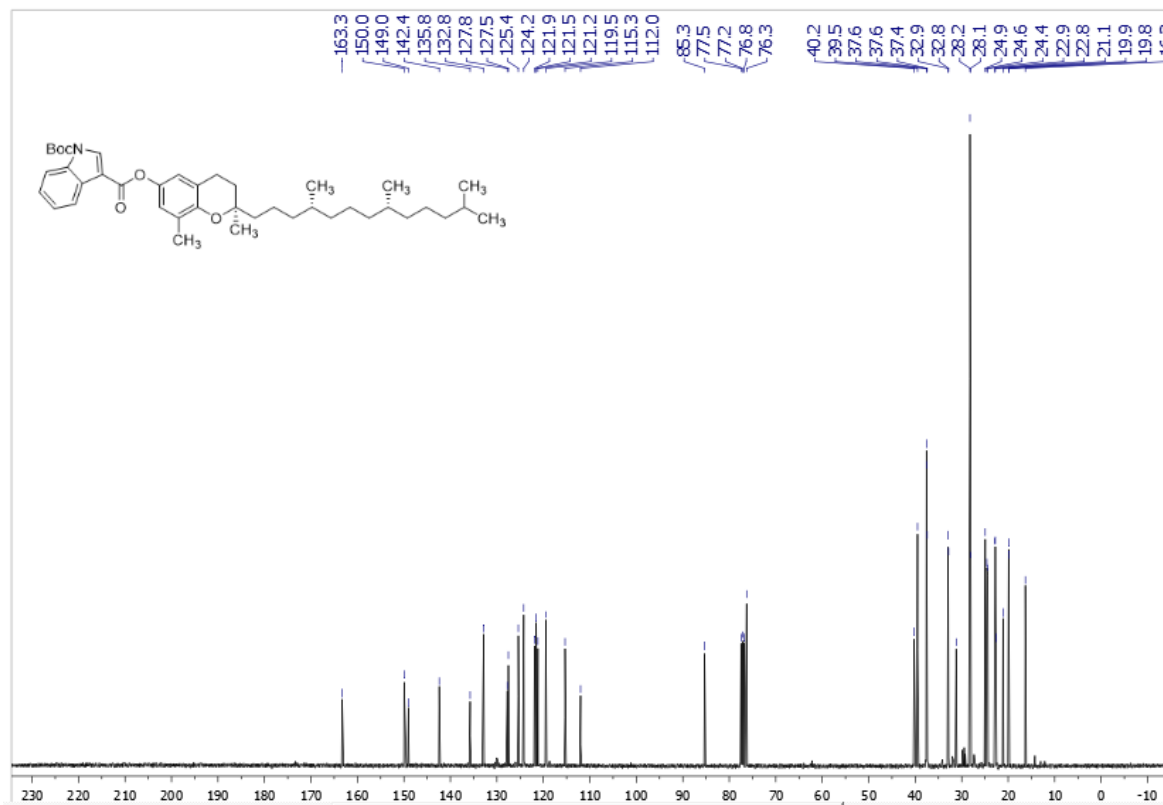

Supplementary Figure 36.  $^{13}\text{C}$  NMR spectra of **1ax**

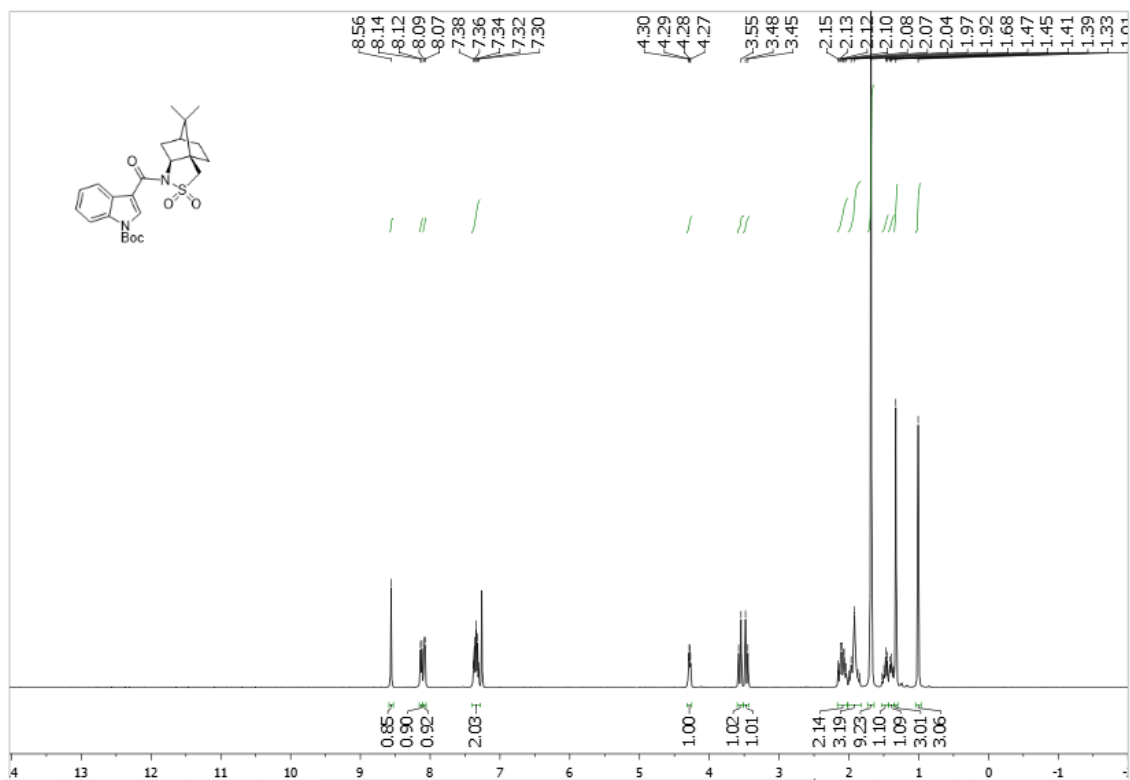

Supplementary Figure 37.  $^1\text{H}$  NMR spectra of **5b**

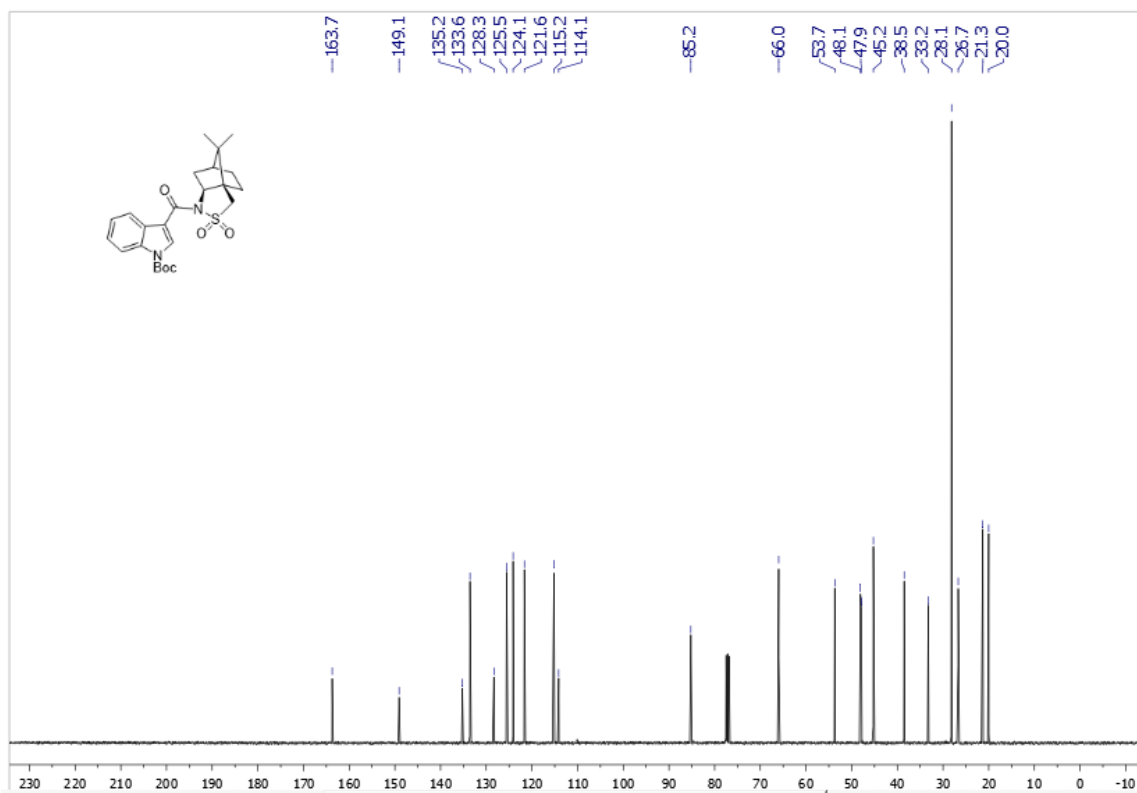

Supplementary Figure 38.  $^{13}\text{C}$  NMR spectra of **5b**

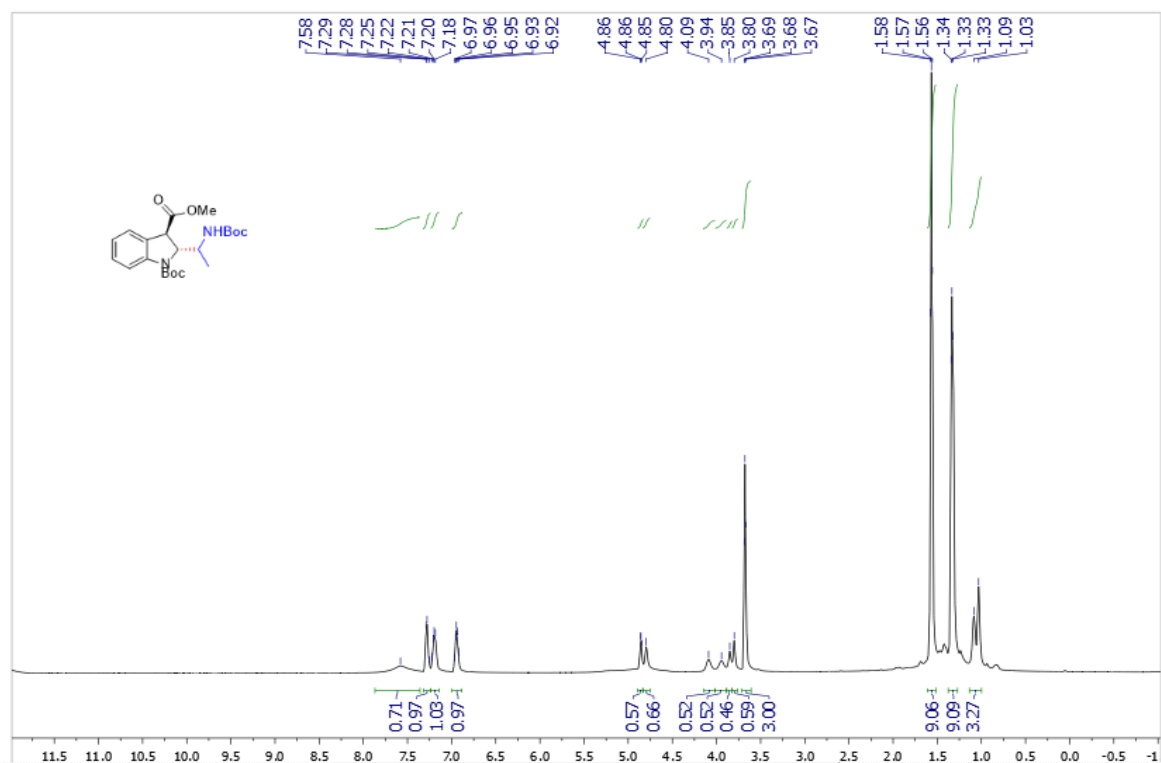

Supplementary Figure 39.  $^1\text{H}$  NMR spectra of *trans*-**3a**

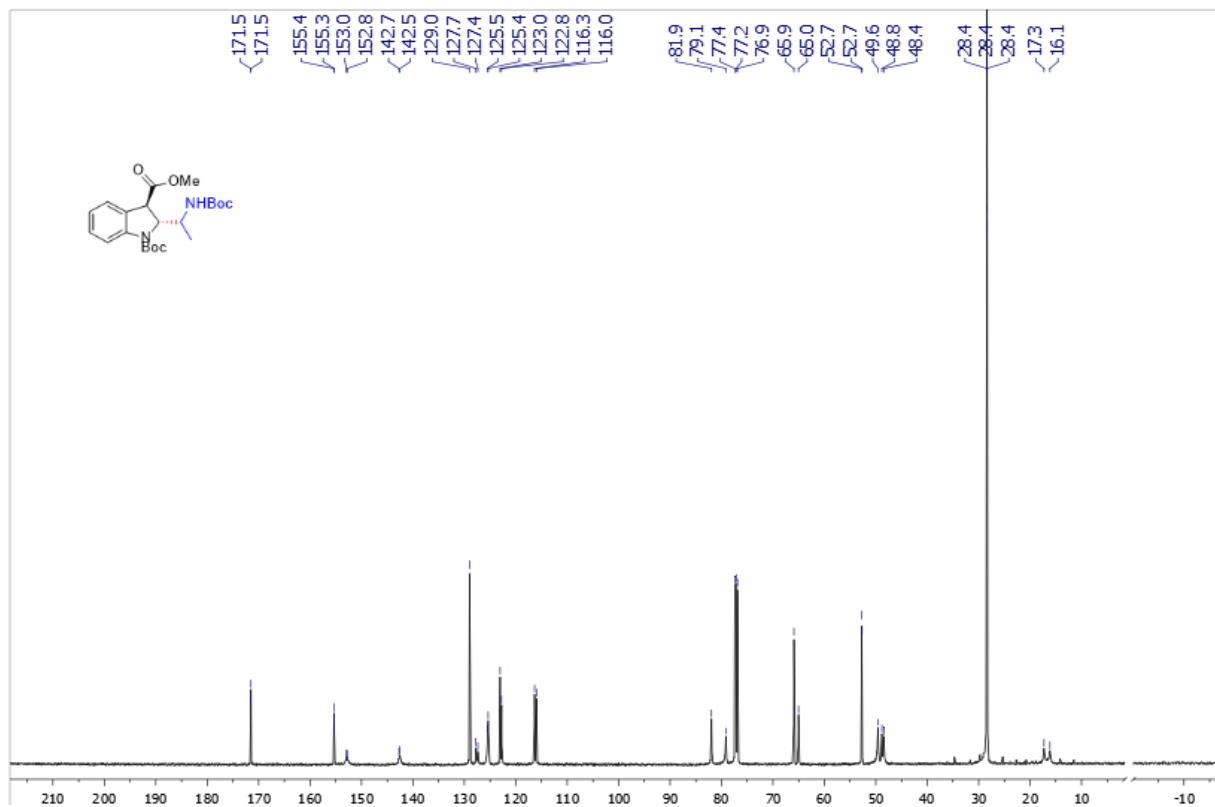

Supplementary Figure 40.  $^{13}\text{C}$  NMR spectra of *trans*-3a

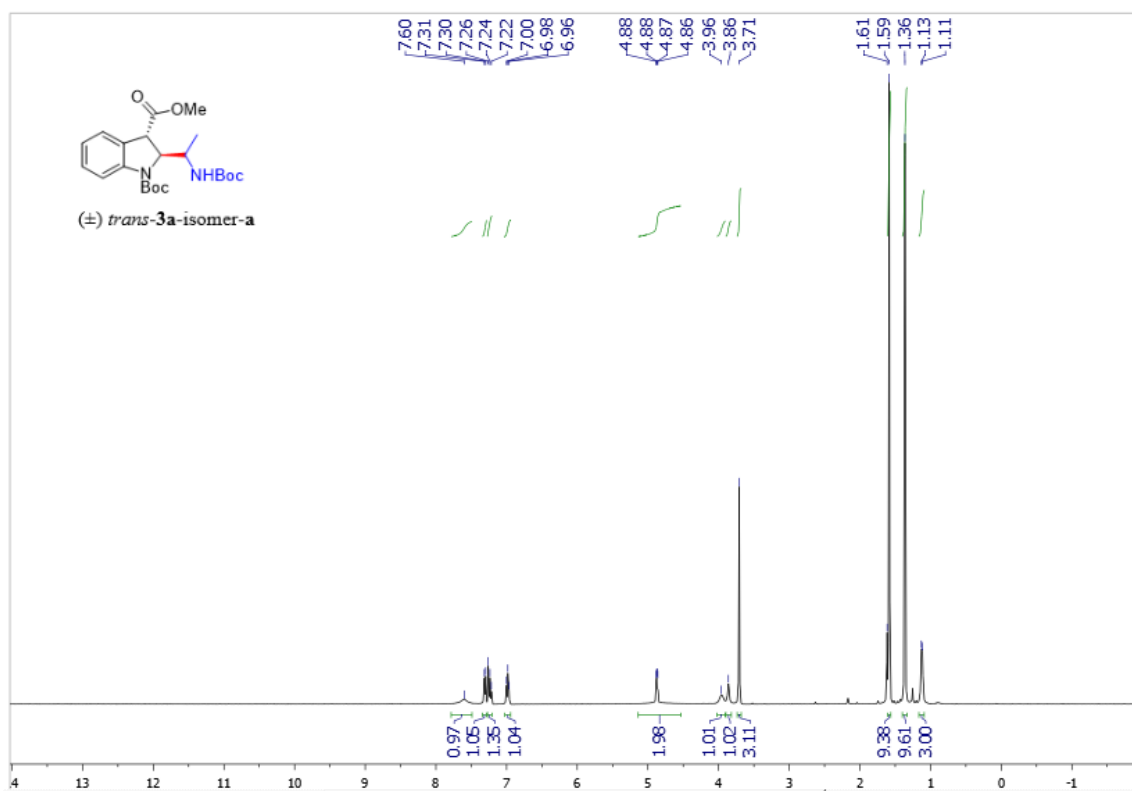

Supplementary Figure 41.  $^1\text{H}$  NMR spectra of *trans*-3a-isomer-a

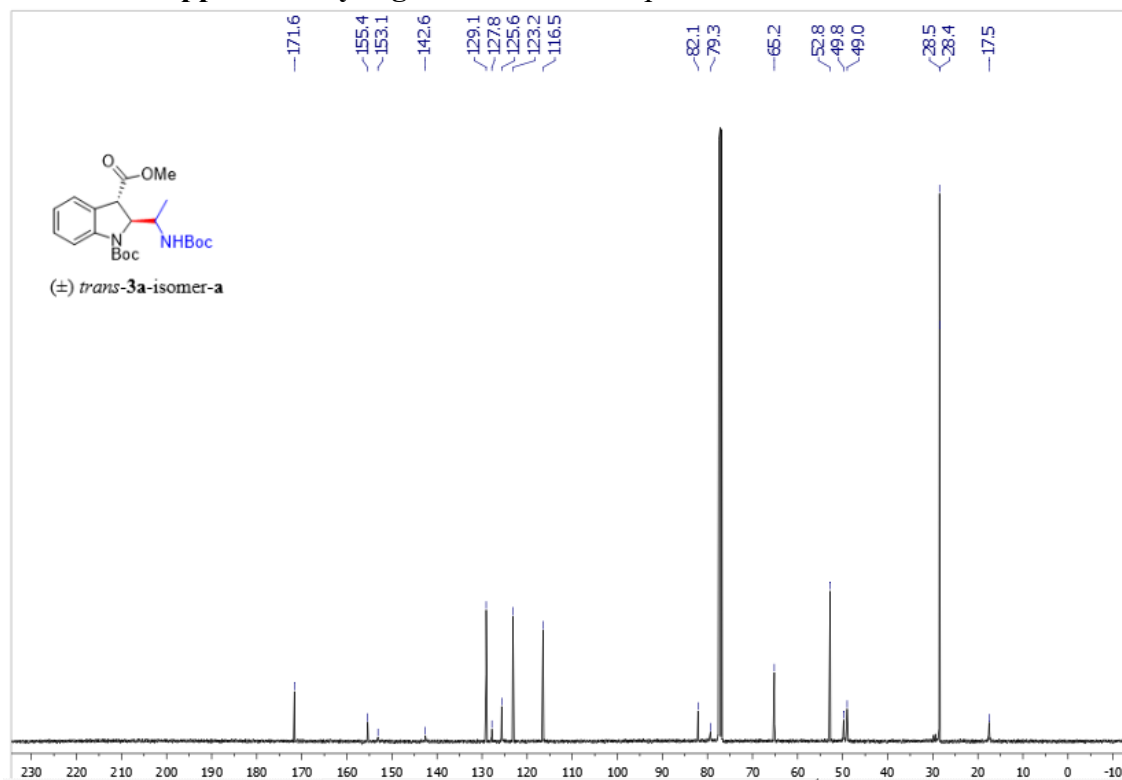

Supplementary Figure 42.  $^{13}\text{C}$  NMR spectra of *trans*-3a-isomer-a

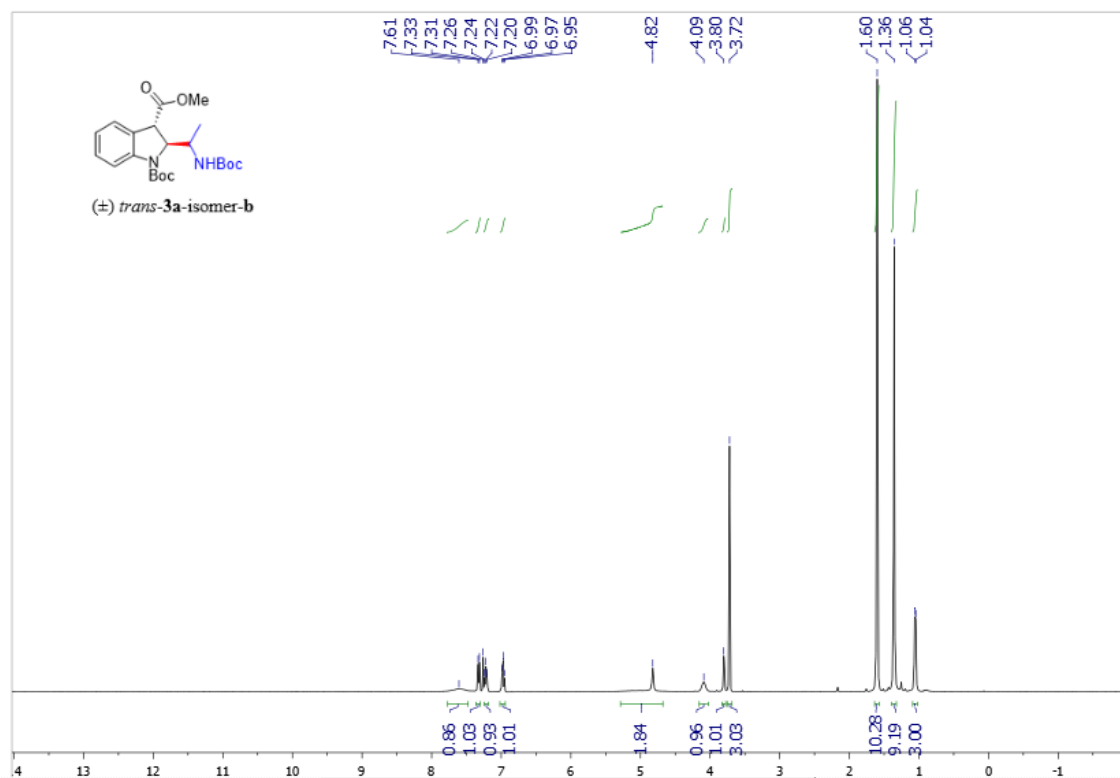

Supplementary Figure 43.  $^1\text{H}$  NMR spectra of *trans*-3a-isomer-b

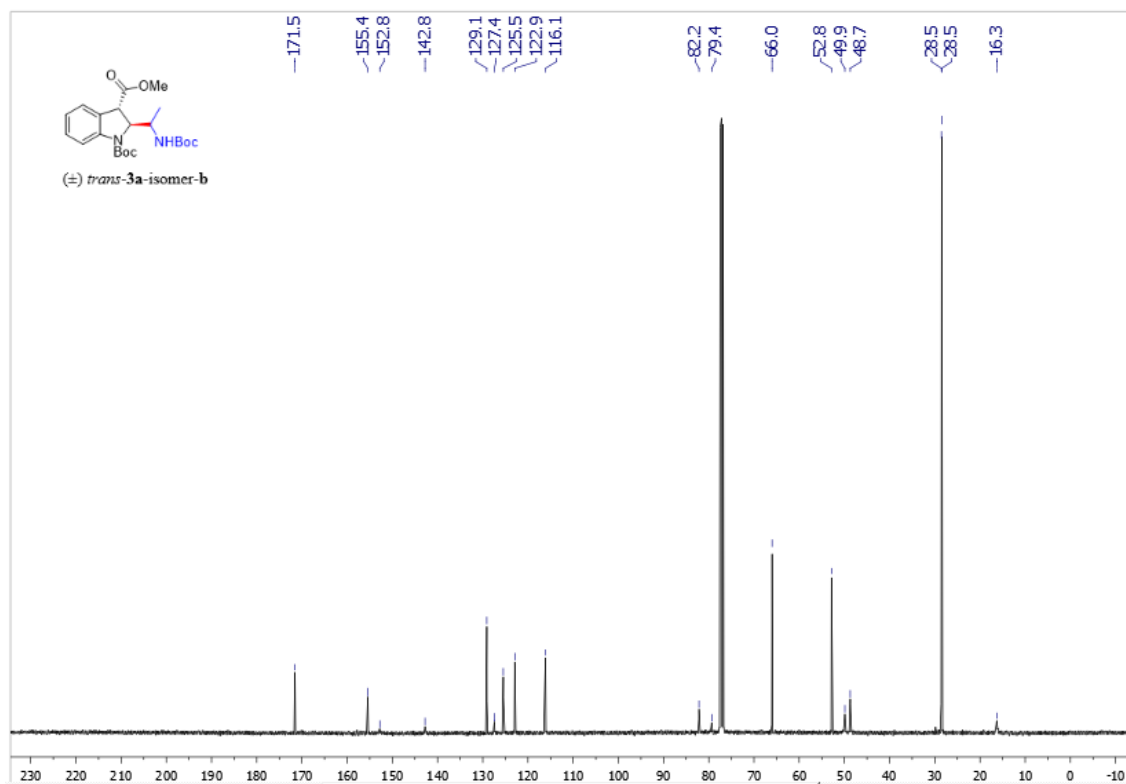

Supplementary Figure 44.  $^{13}\text{C}$  NMR spectra of *trans*-3a-isomer-b

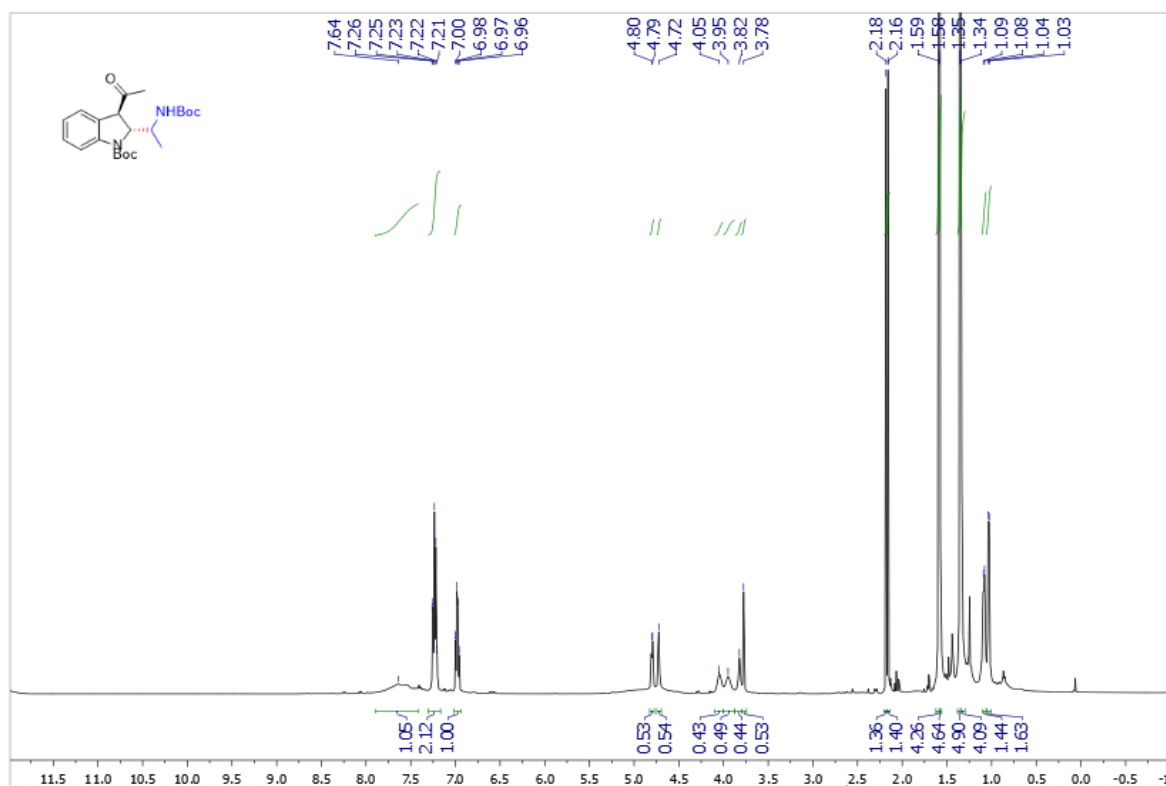

Supplementary Figure 45.  $^1\text{H}$  NMR spectra of *trans*-3b

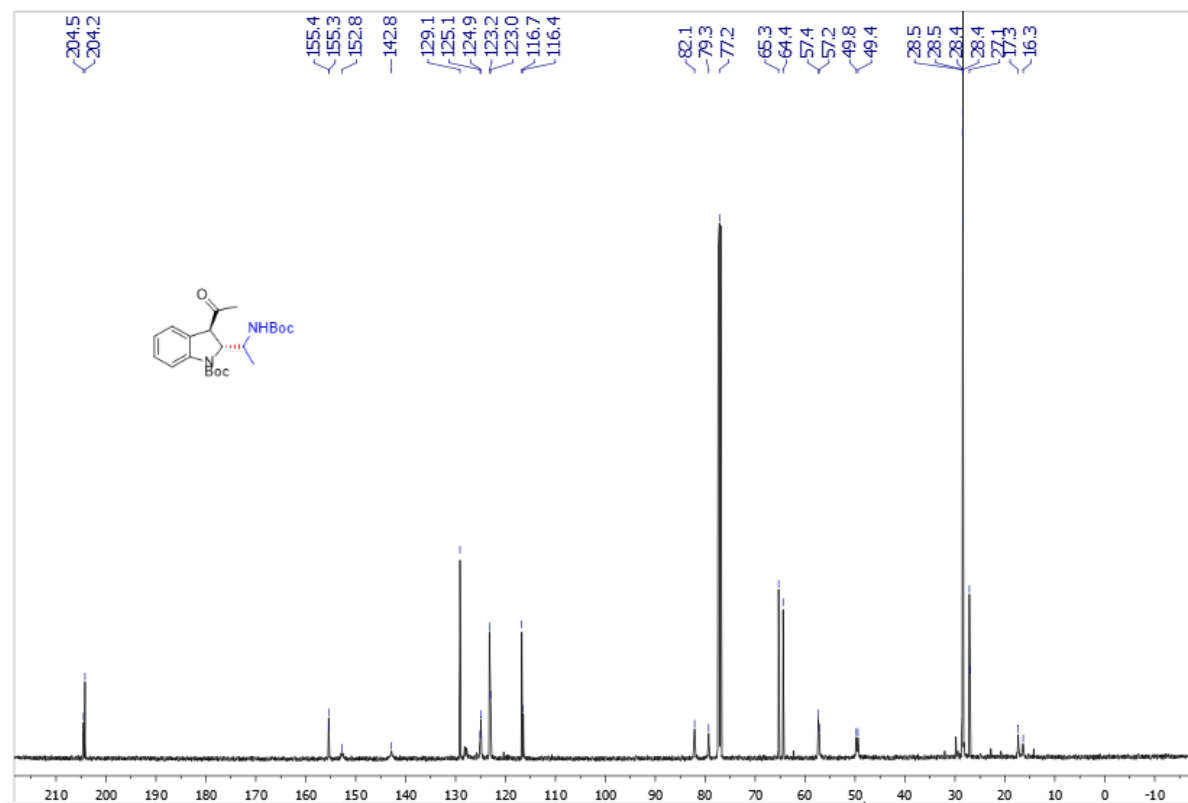

Supplementary Figure 46.  $^{13}\text{C}$  NMR spectra of *trans*-3b

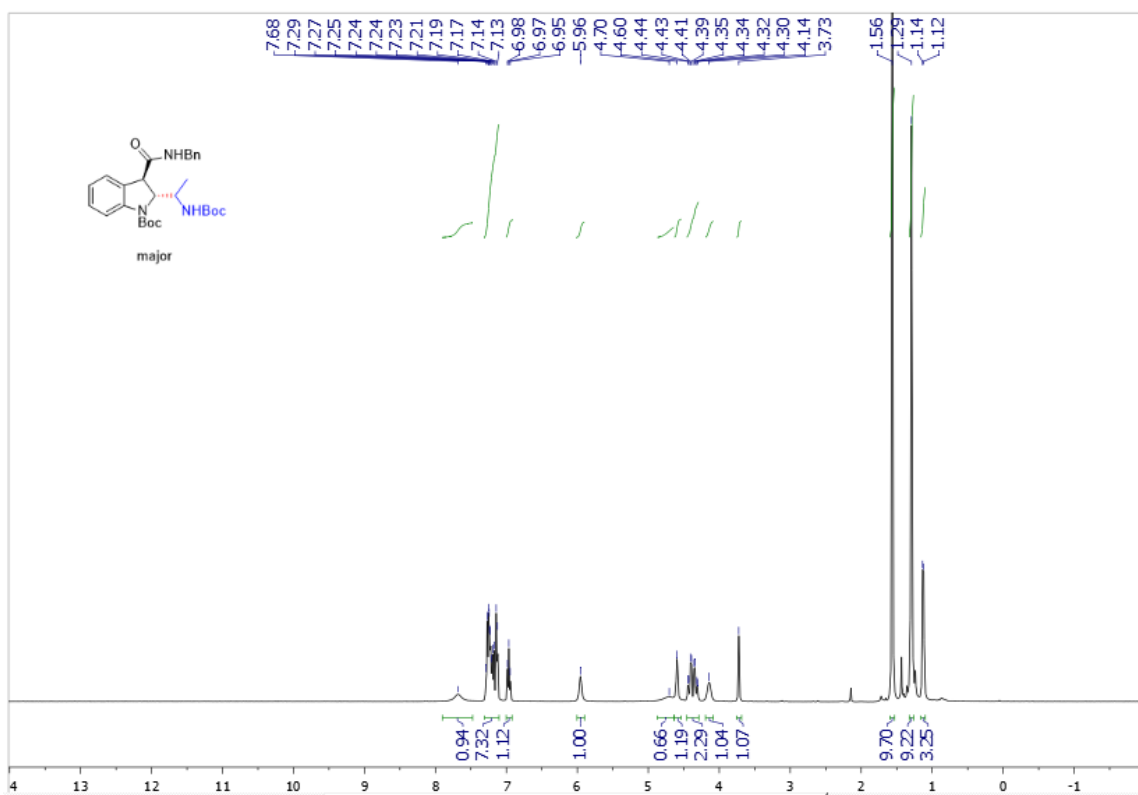

Supplementary Figure 47.  $^1\text{H}$  NMR spectra of *trans*-3c-major

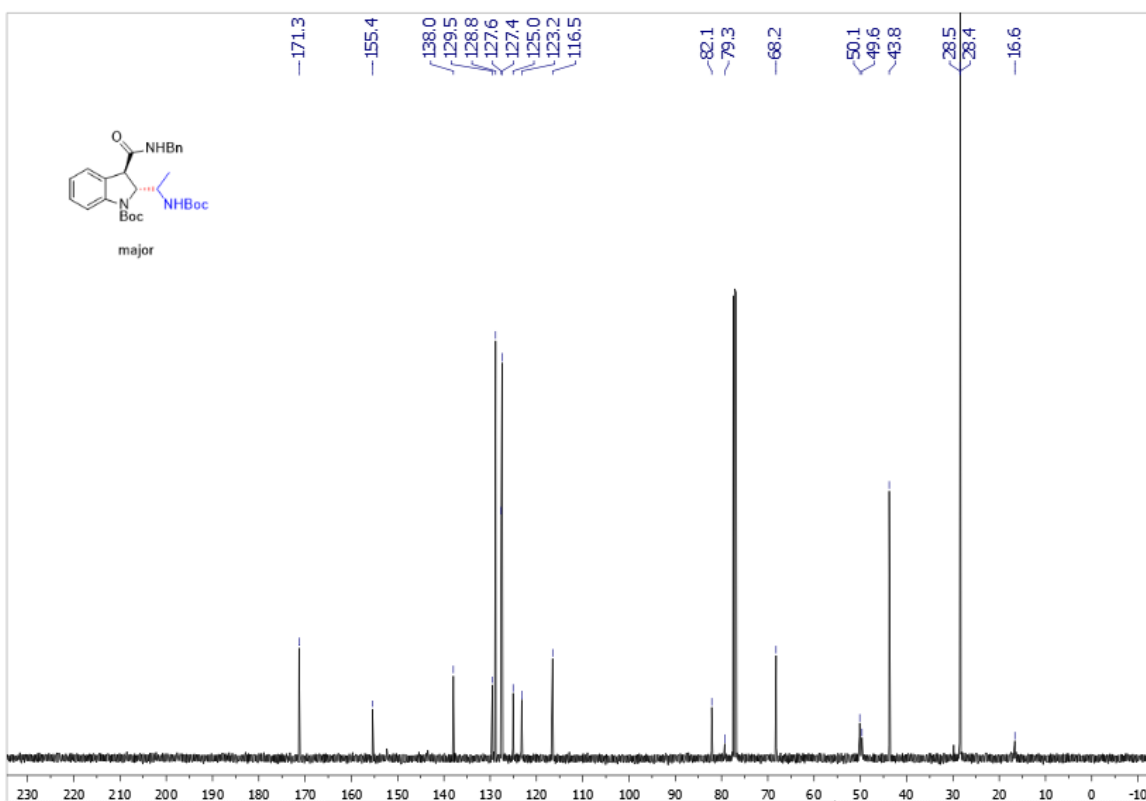

Supplementary Figure 48.  $^{13}\text{C}$  NMR spectra of *trans*-3c-major

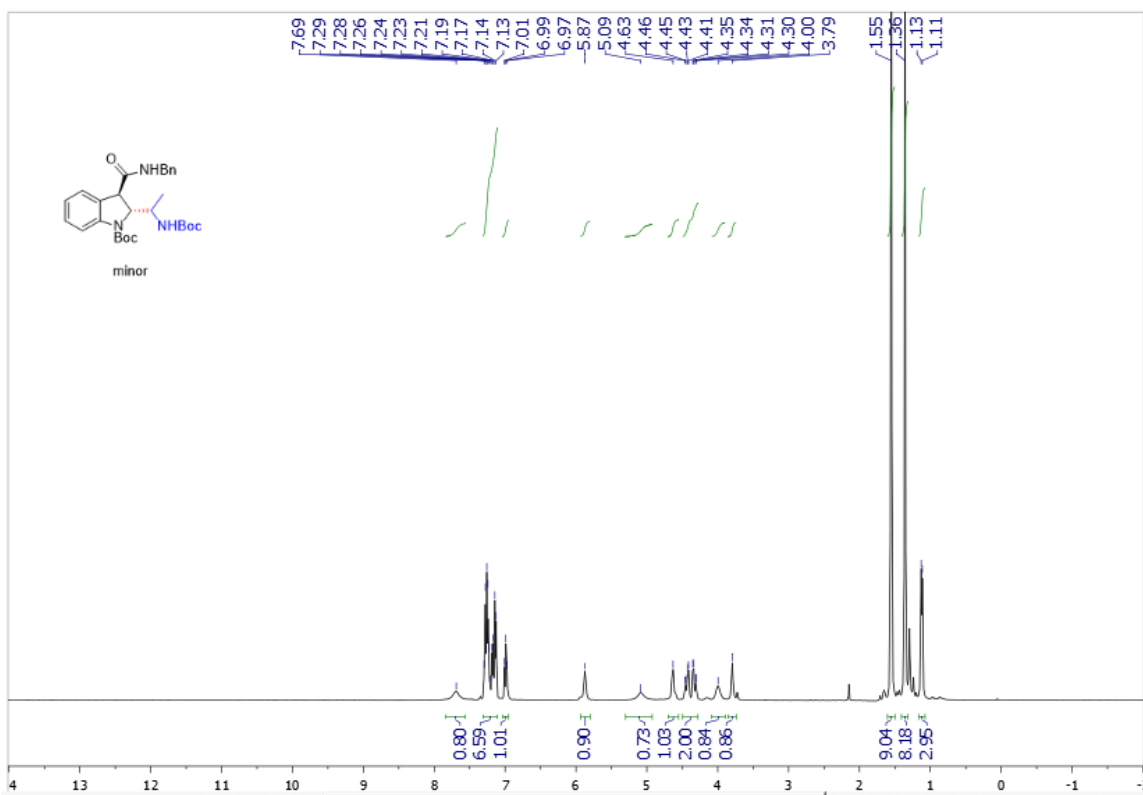

Supplementary Figure 49.  $^1\text{H}$  NMR spectra of *trans*-3c-minor

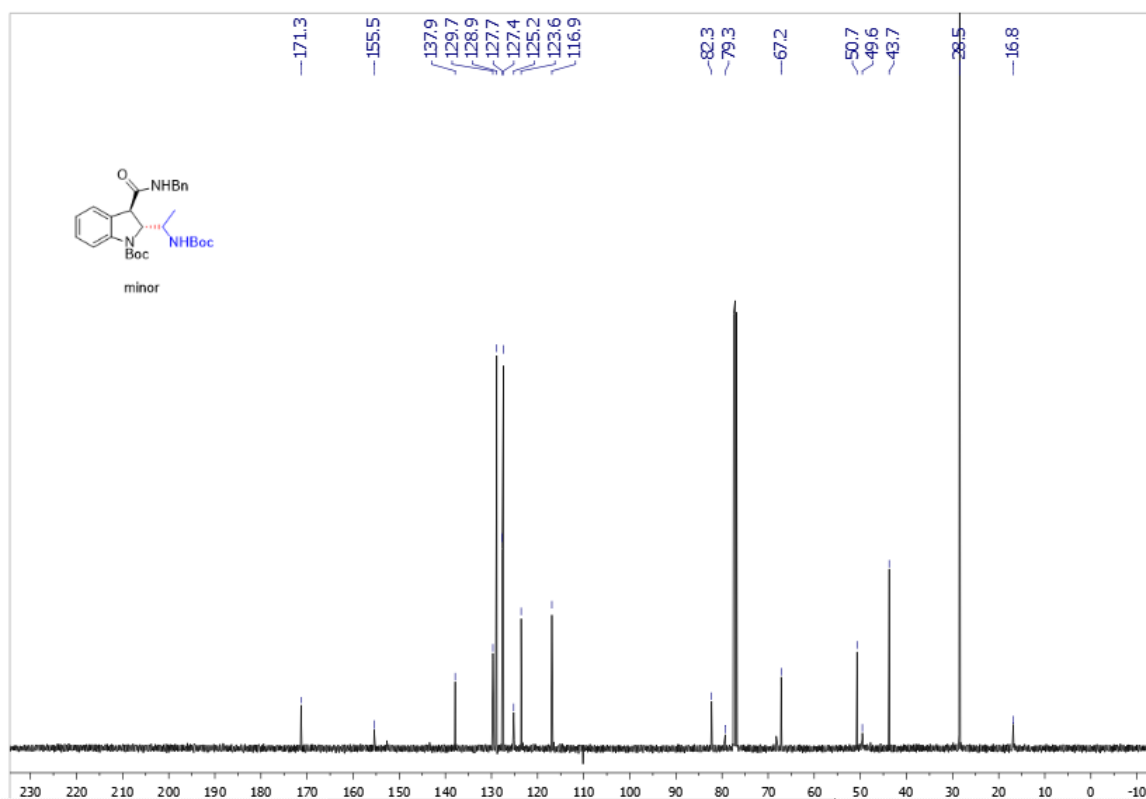



Supplementary Figure 50.  $^{13}\text{C}$  NMR spectra of *trans*-3c-minor

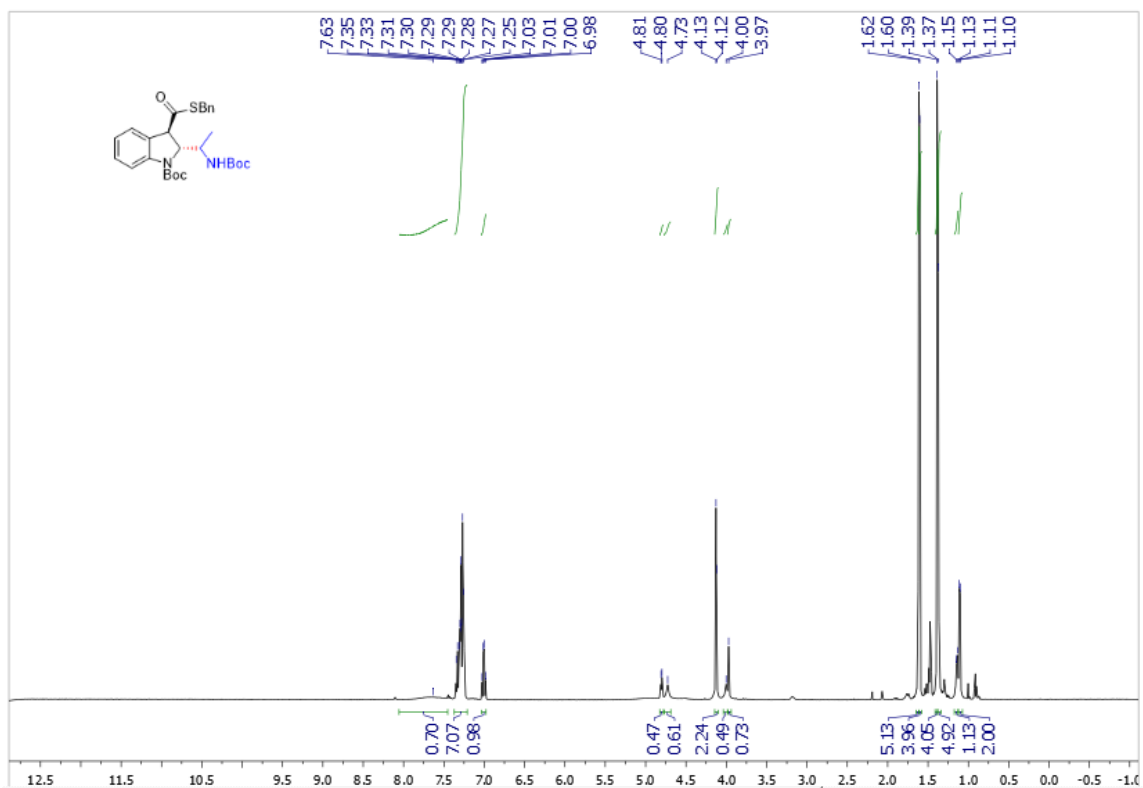

Supplementary Figure 51.  $^1\text{H}$  NMR spectra of *trans*-3d

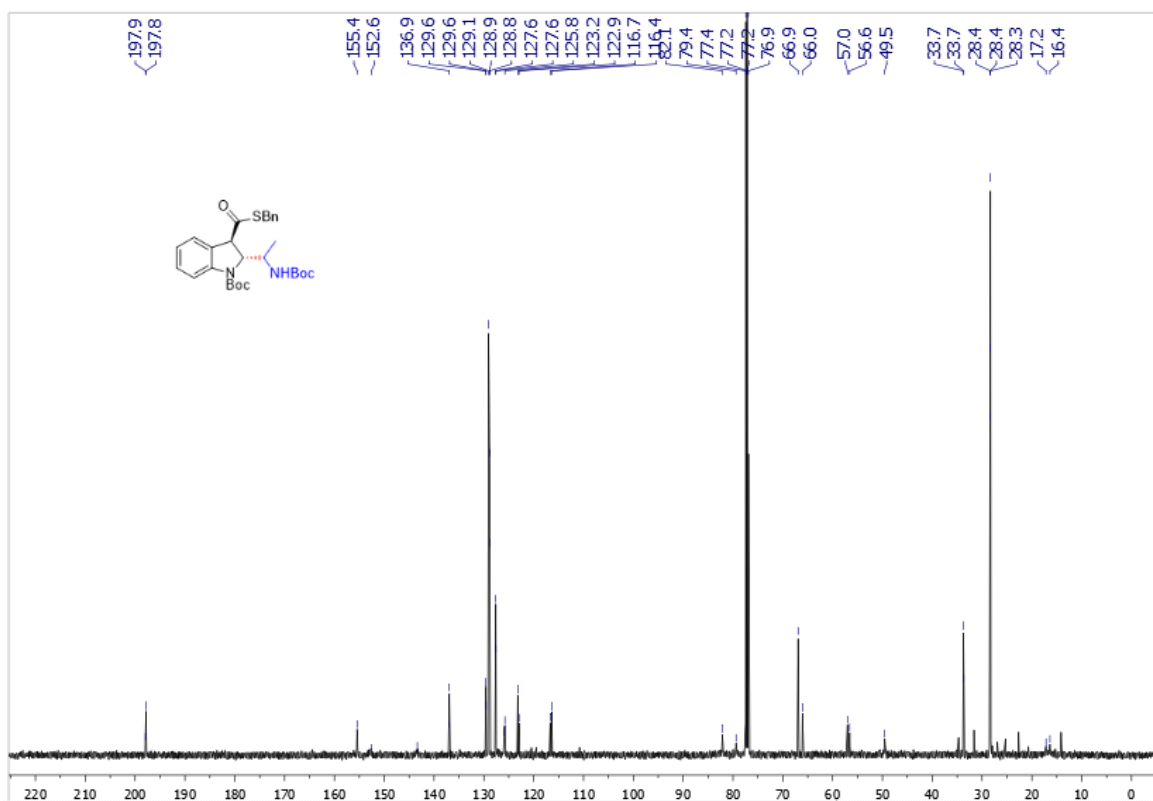

Supplementary Figure 52.  $^{13}\text{C}$  NMR spectra of *trans*-3d

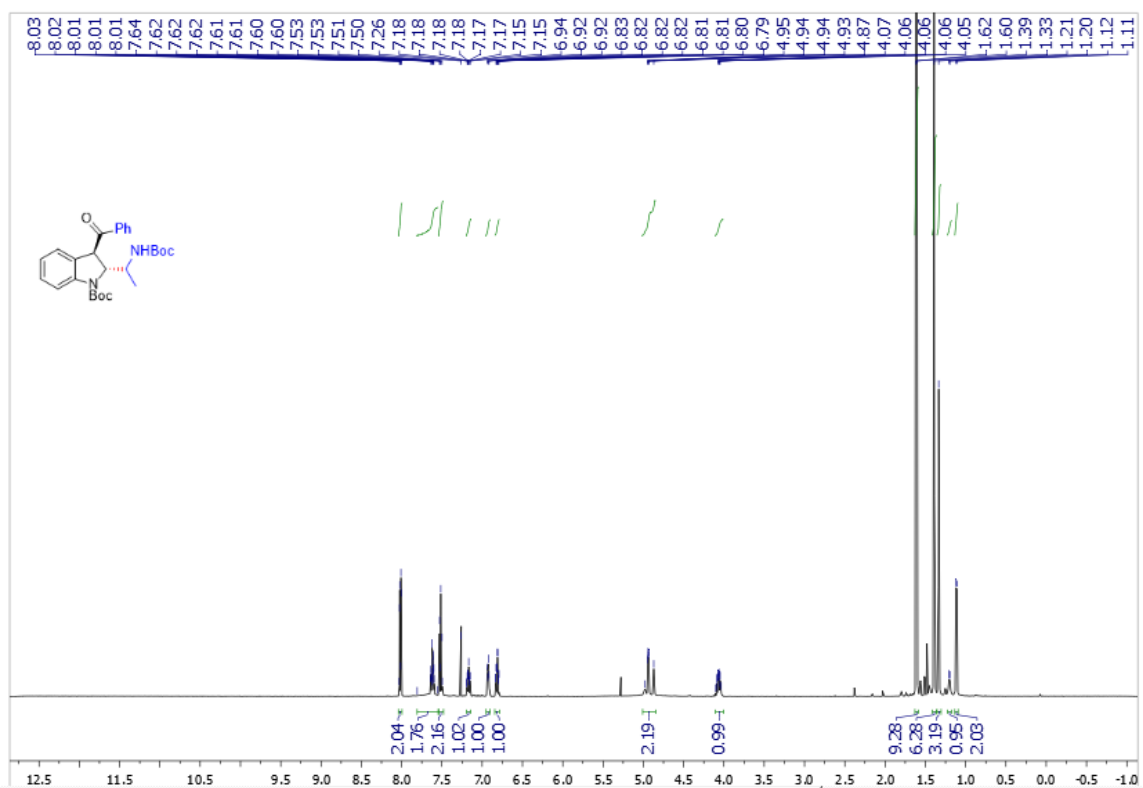

Supplementary Figure 53.  $^1\text{H}$  NMR spectra of *trans*-3e

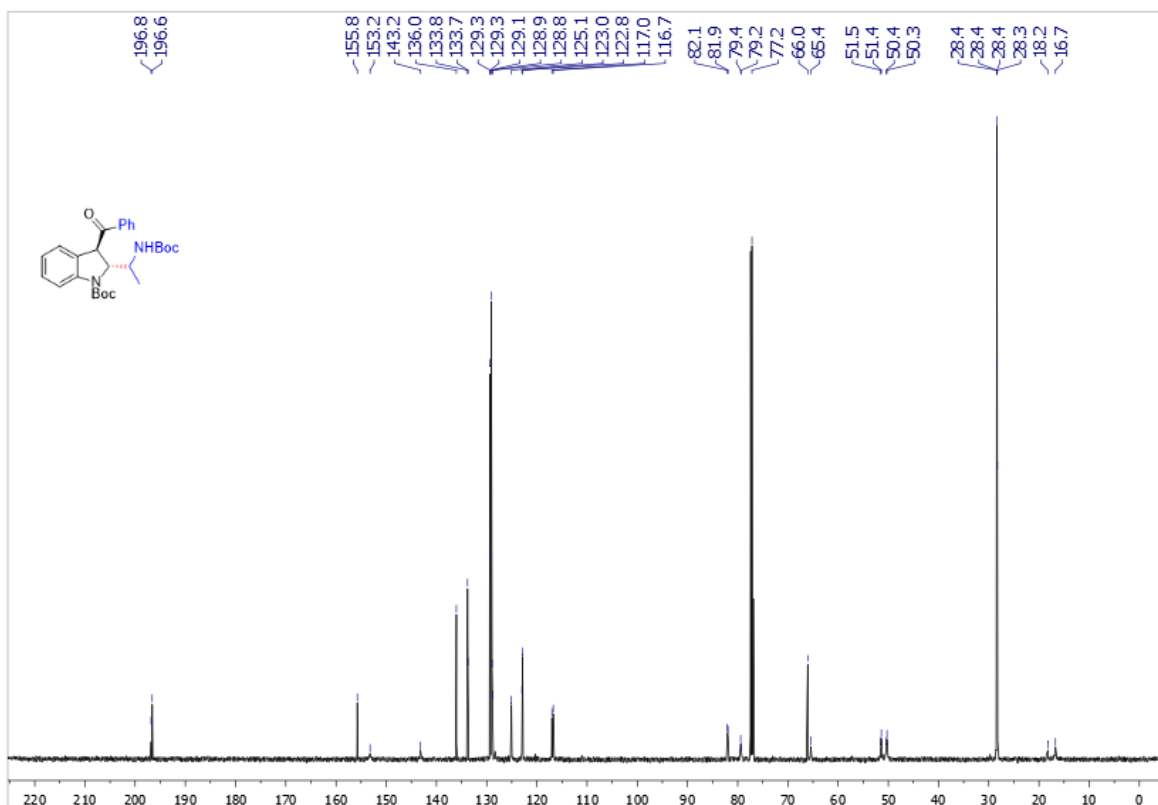

Supplementary Figure 54.  $^{13}\text{C}$  NMR spectra of *trans*-3e

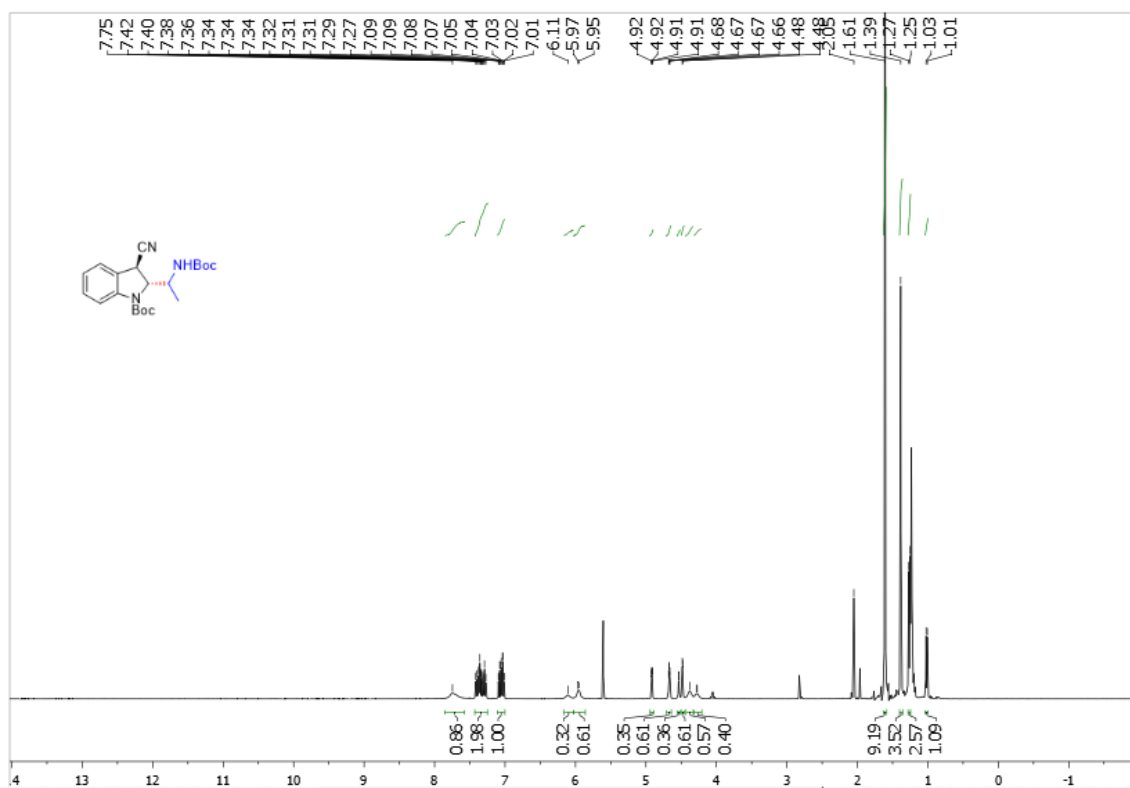

Supplementary Figure 55.  $^1\text{H}$  NMR spectra of *trans*-3f

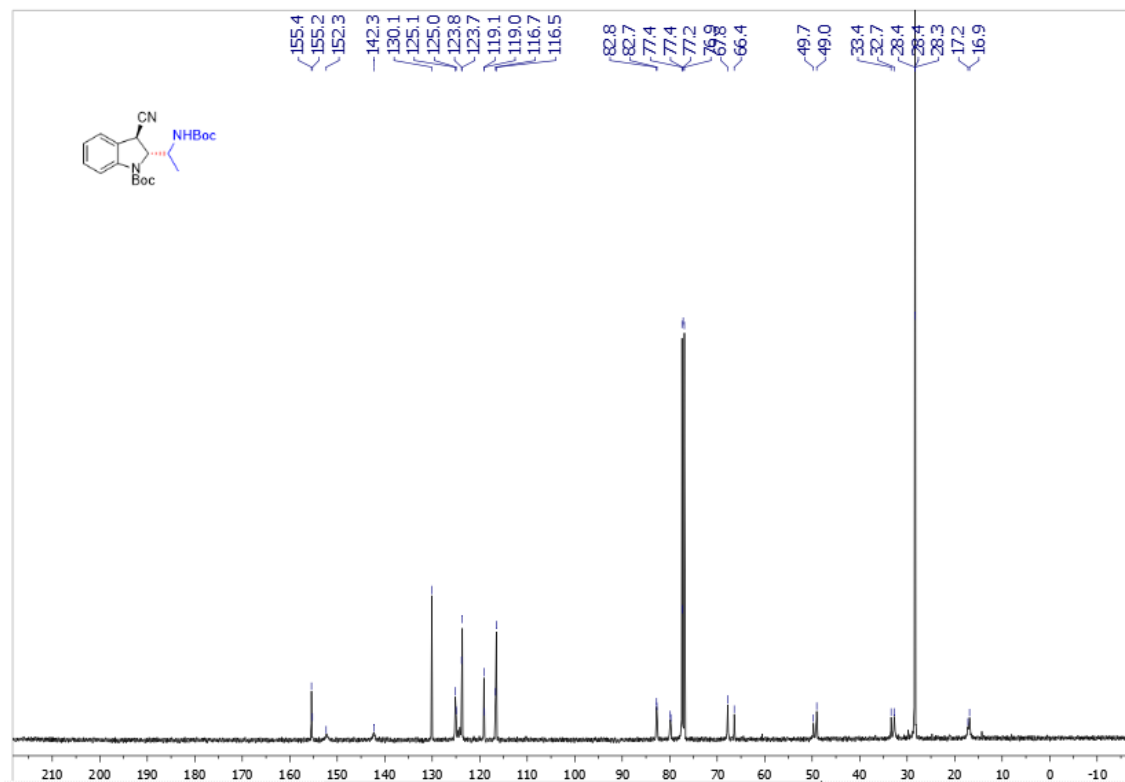

Supplementary Figure 56.  $^{13}\text{C}$  NMR spectra of *trans*-3f

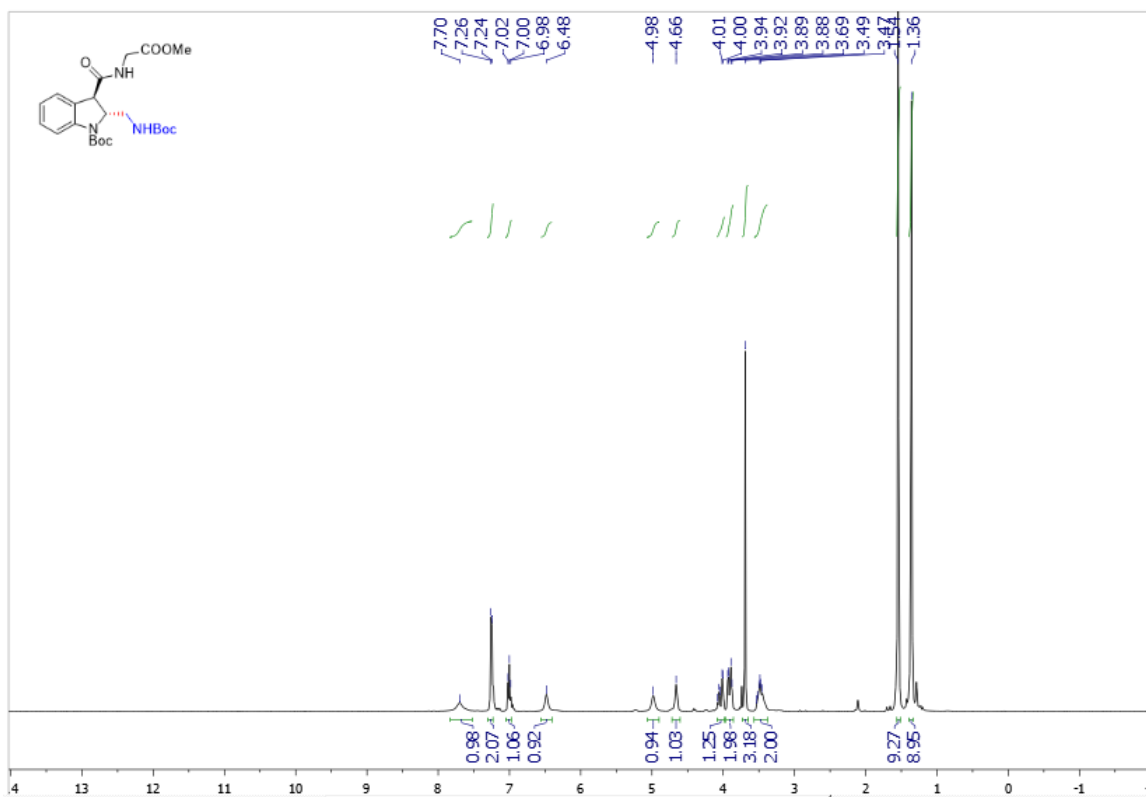

Supplementary Figure 57.  $^1\text{H}$  NMR spectra of *trans*-3g

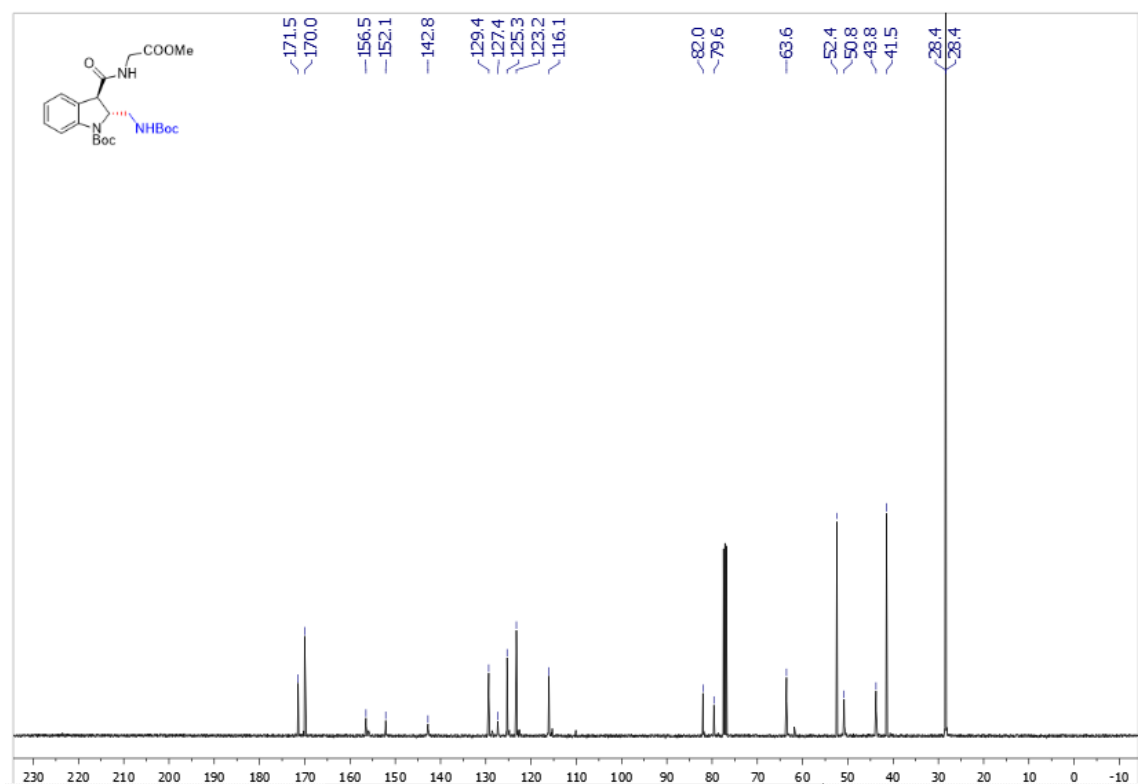

Supplementary Figure 58.  $^{13}\text{C}$  NMR spectra of *trans*-3g

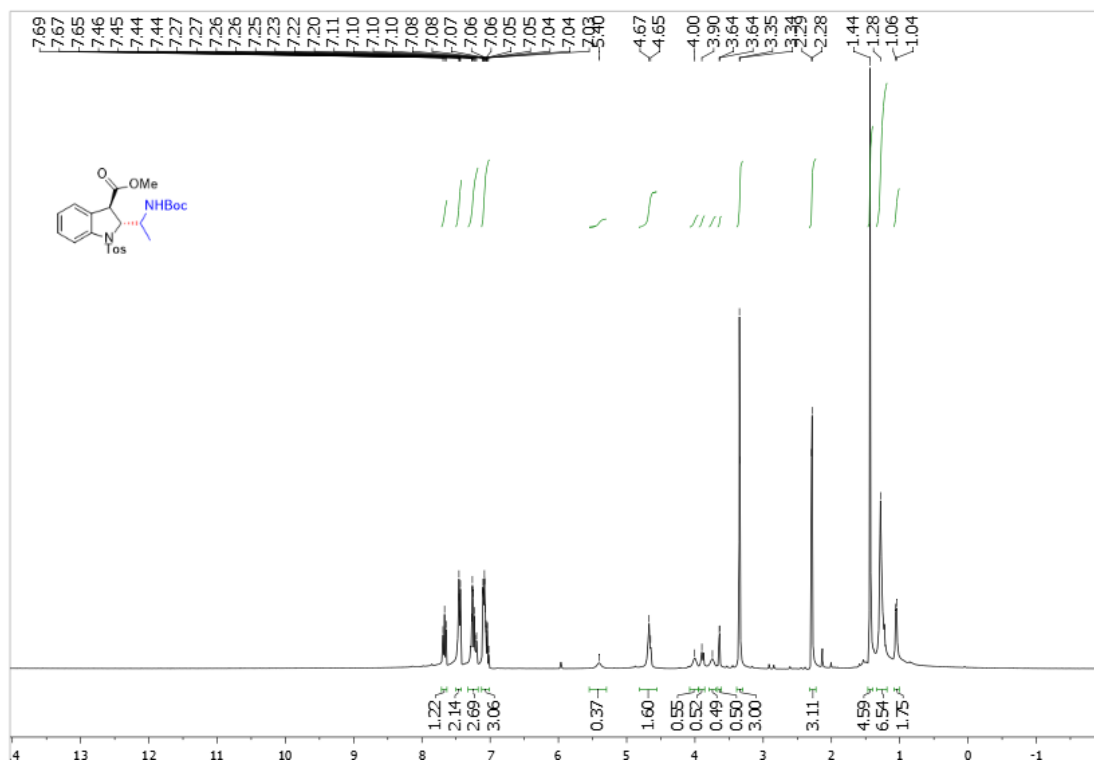

Supplementary Figure 59.  $^1\text{H}$  NMR spectra of *trans*-3h

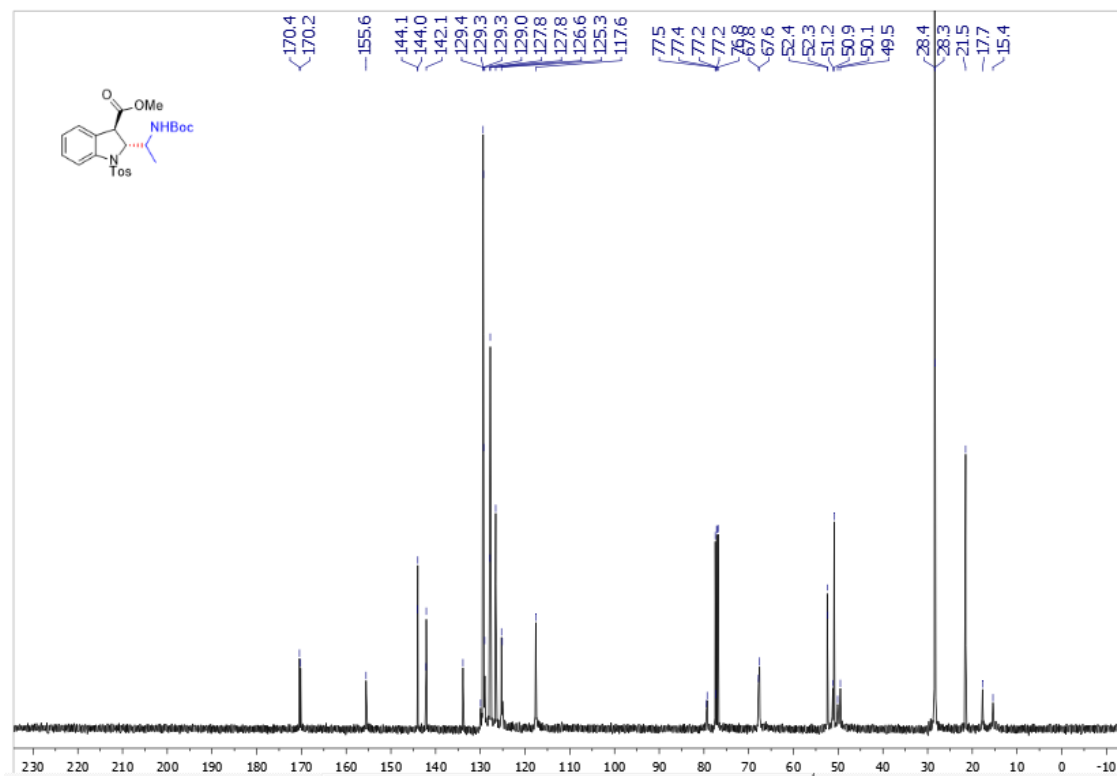

Supplementary Figure 60.  $^{13}\text{C}$  NMR spectra of *trans*-3h



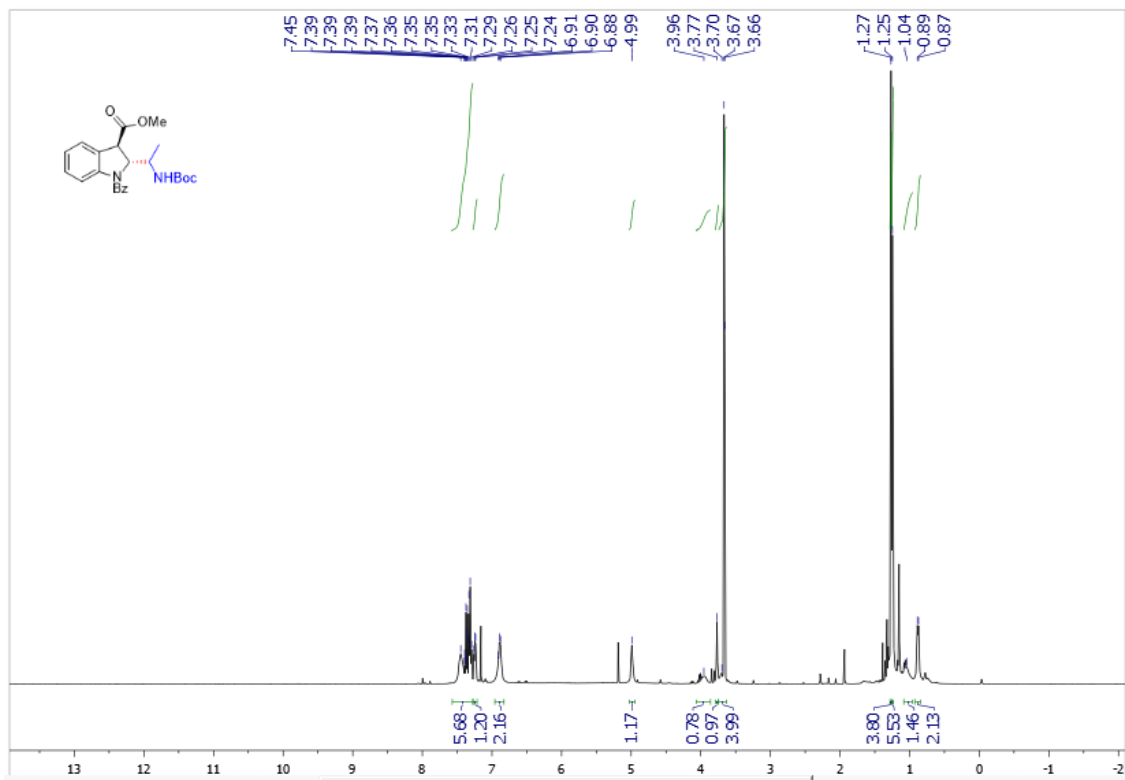

Supplementary Figure 61.  $^1\text{H}$  NMR spectra of *trans*-3i

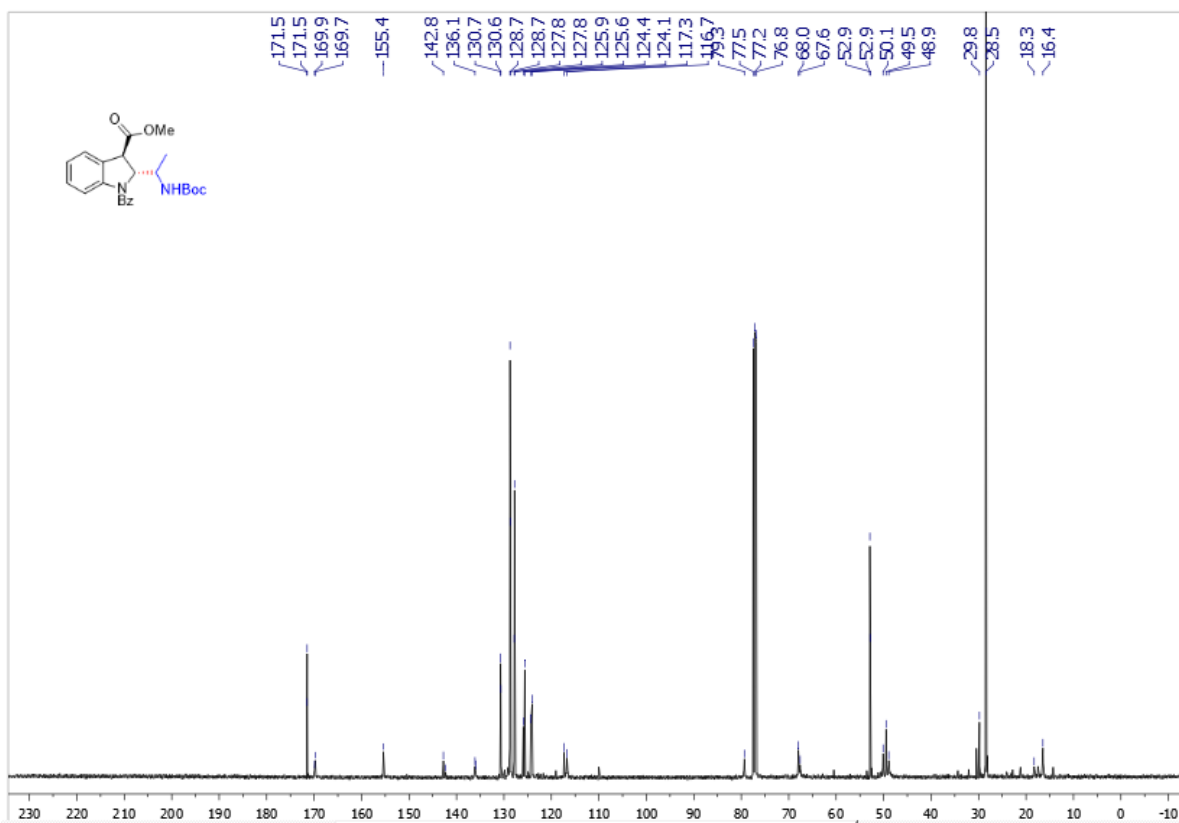

Supplementary Figure 62.  $^{13}\text{C}$  NMR spectra of *trans*-3i

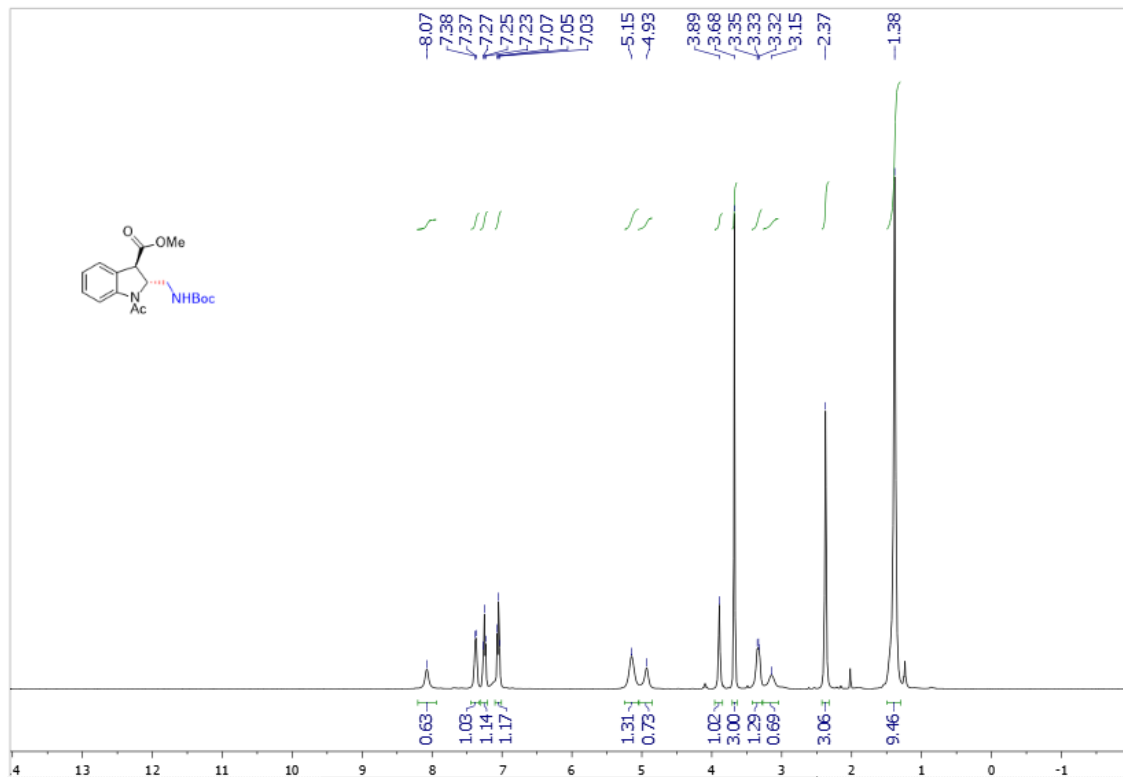

Supplementary Figure 63.  $^1\text{H}$  NMR spectra of *trans*-3j

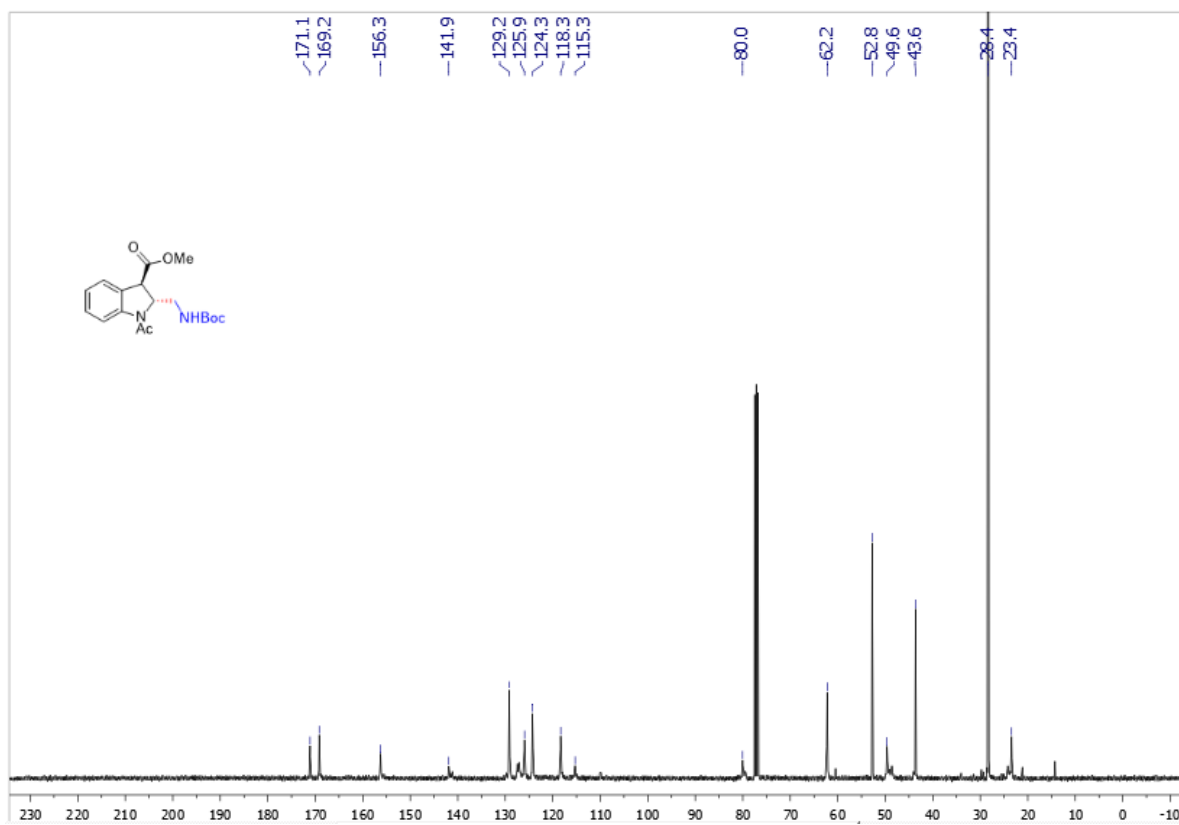

Supplementary Figure 64.  $^{13}\text{C}$  NMR spectra of *trans*-3j



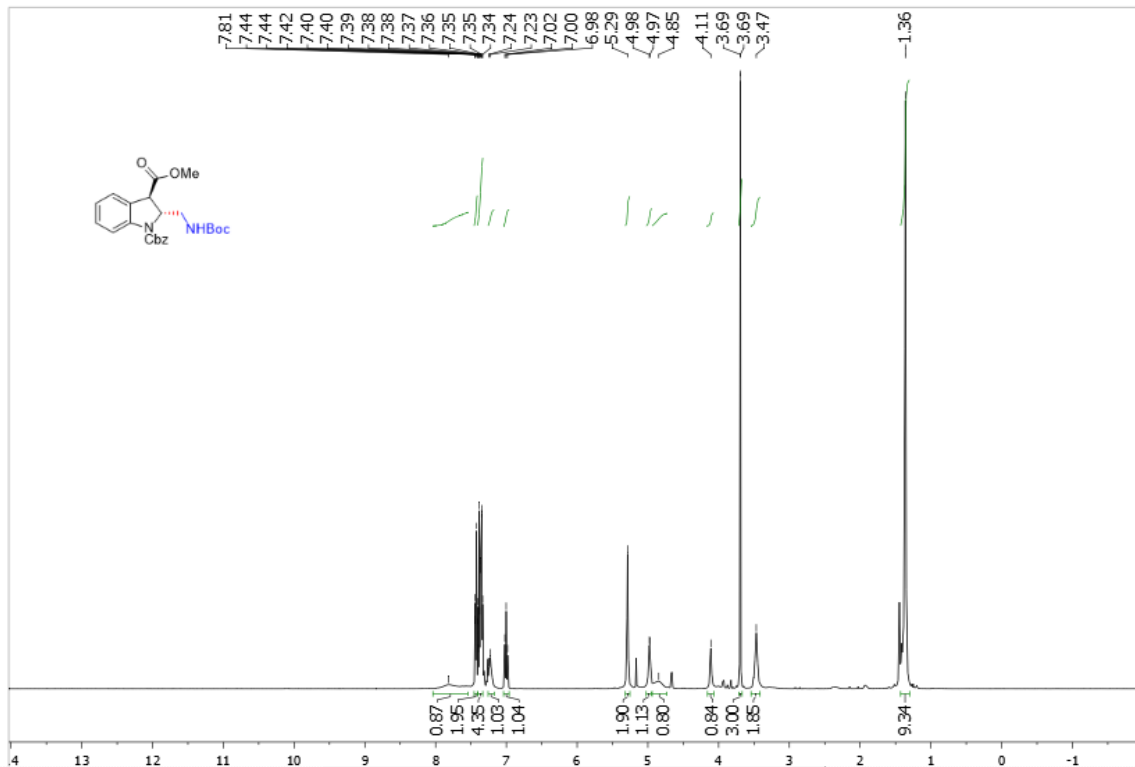

Supplementary Figure 65.  $^1\text{H}$  NMR spectra of *trans*-3k

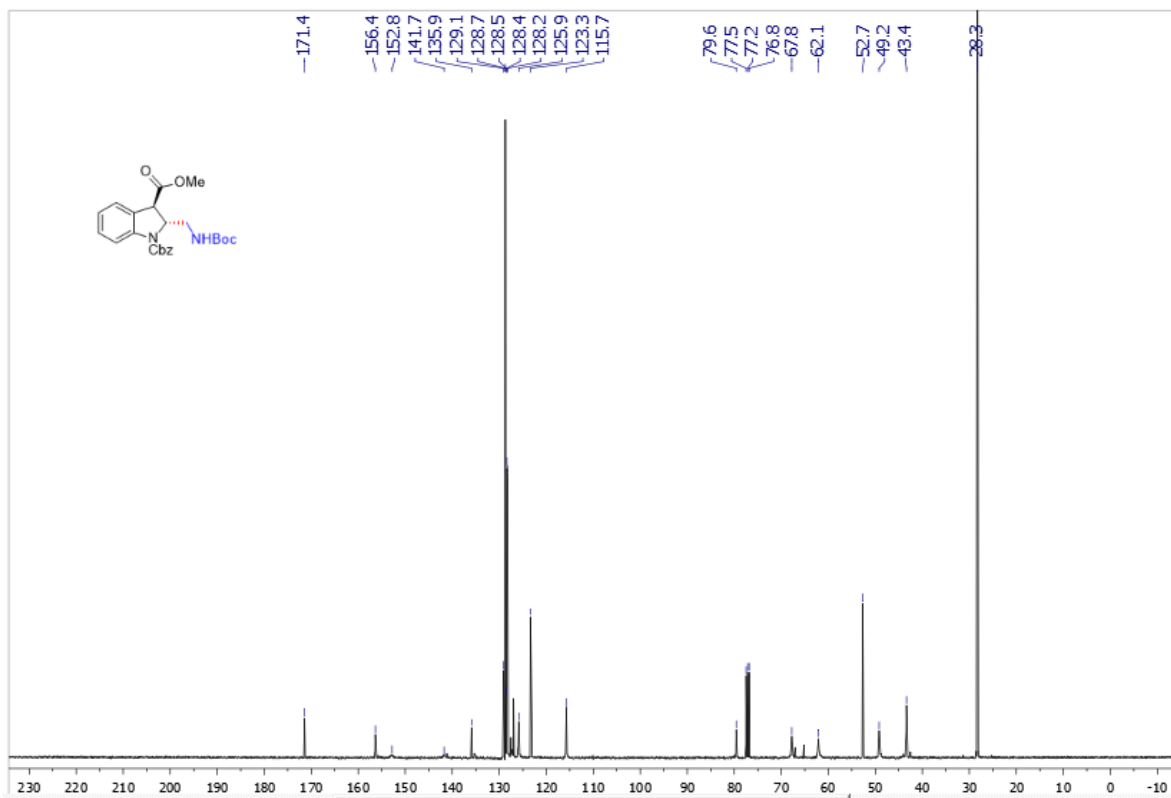

Supplementary Figure 66.  $^{13}\text{C}$  NMR spectra of *trans*-3k

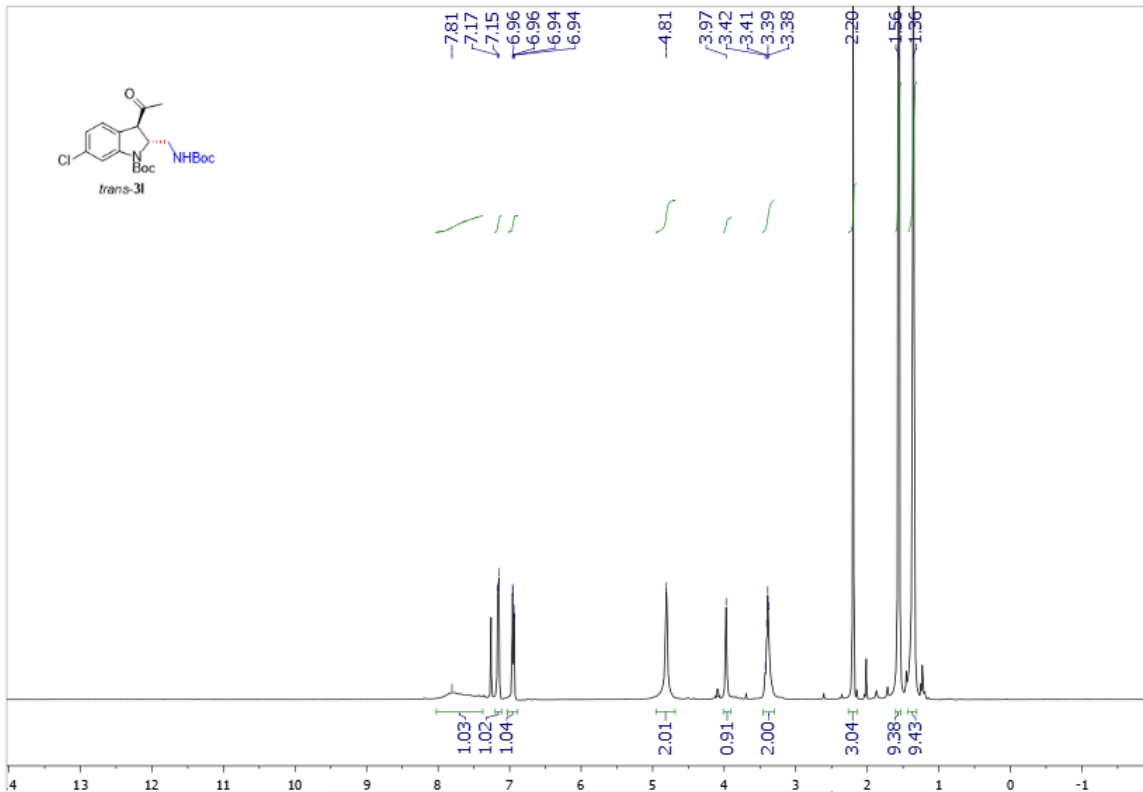

Supplementary Figure 67. <sup>1</sup>H NMR spectra of *trans*-31

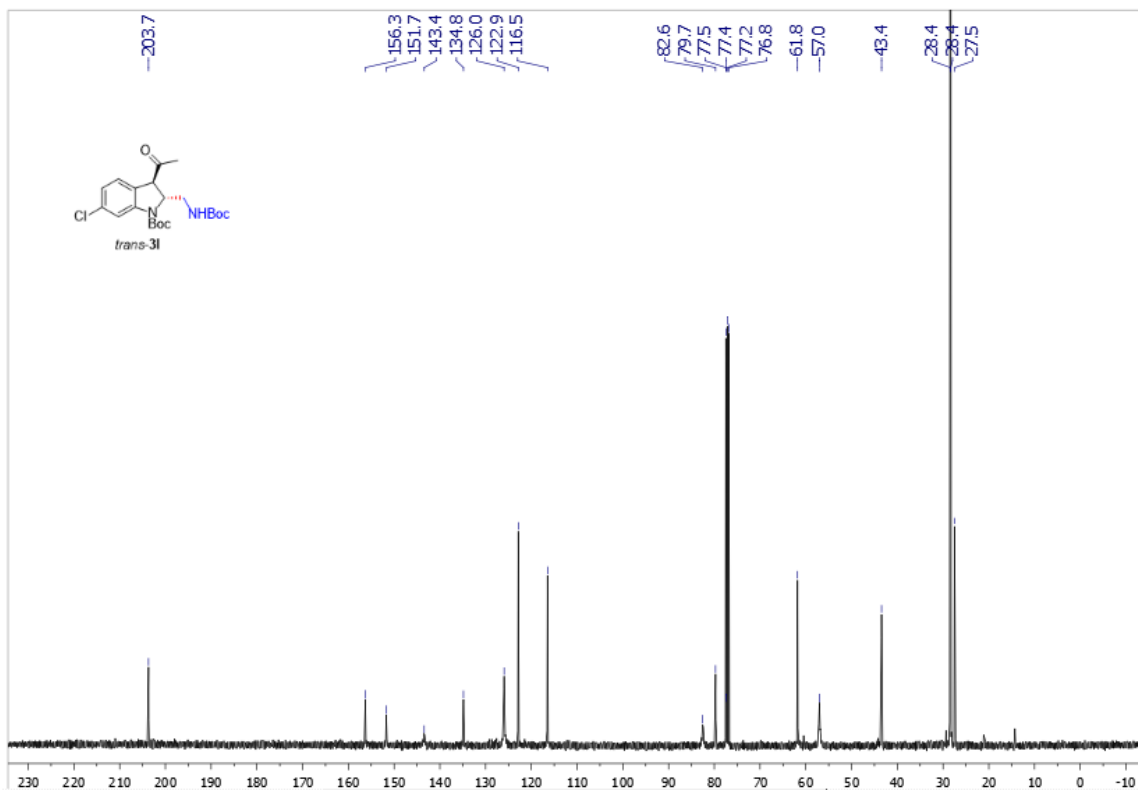

Supplementary Figure 68. <sup>13</sup>C NMR spectra of *trans*-31

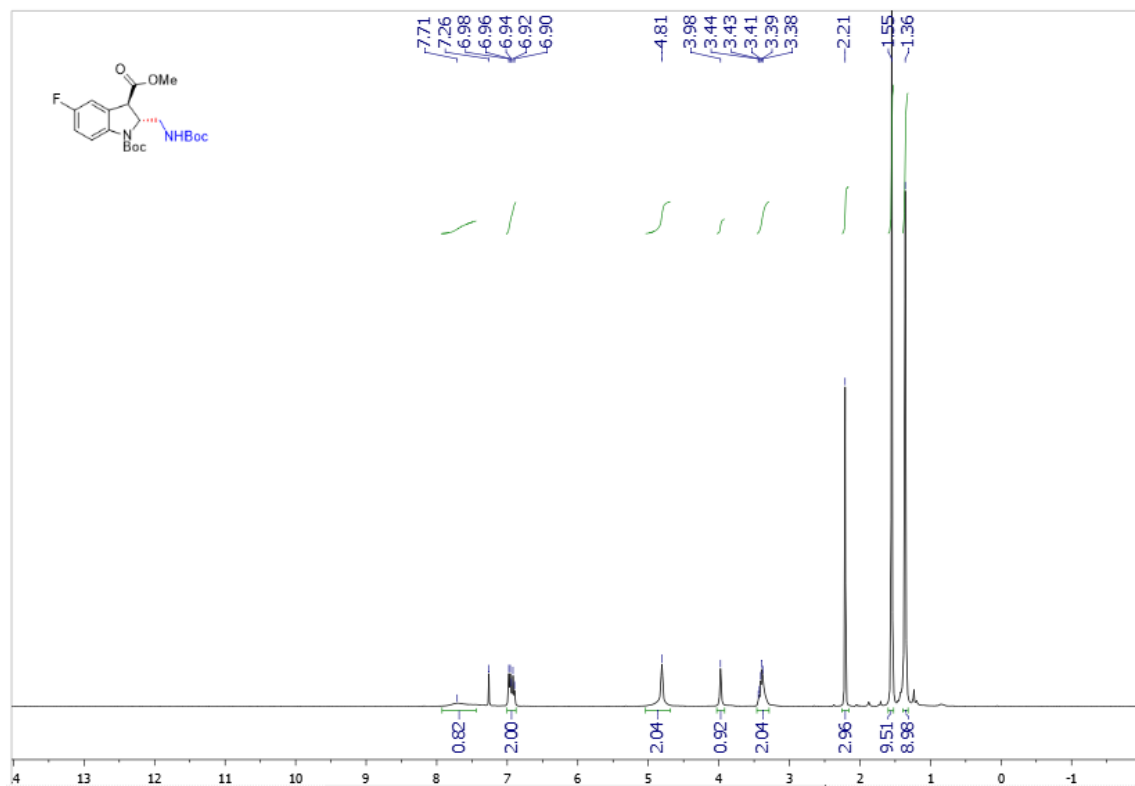

Supplementary Figure 69.  $^1\text{H}$  NMR spectra of *trans*-3m

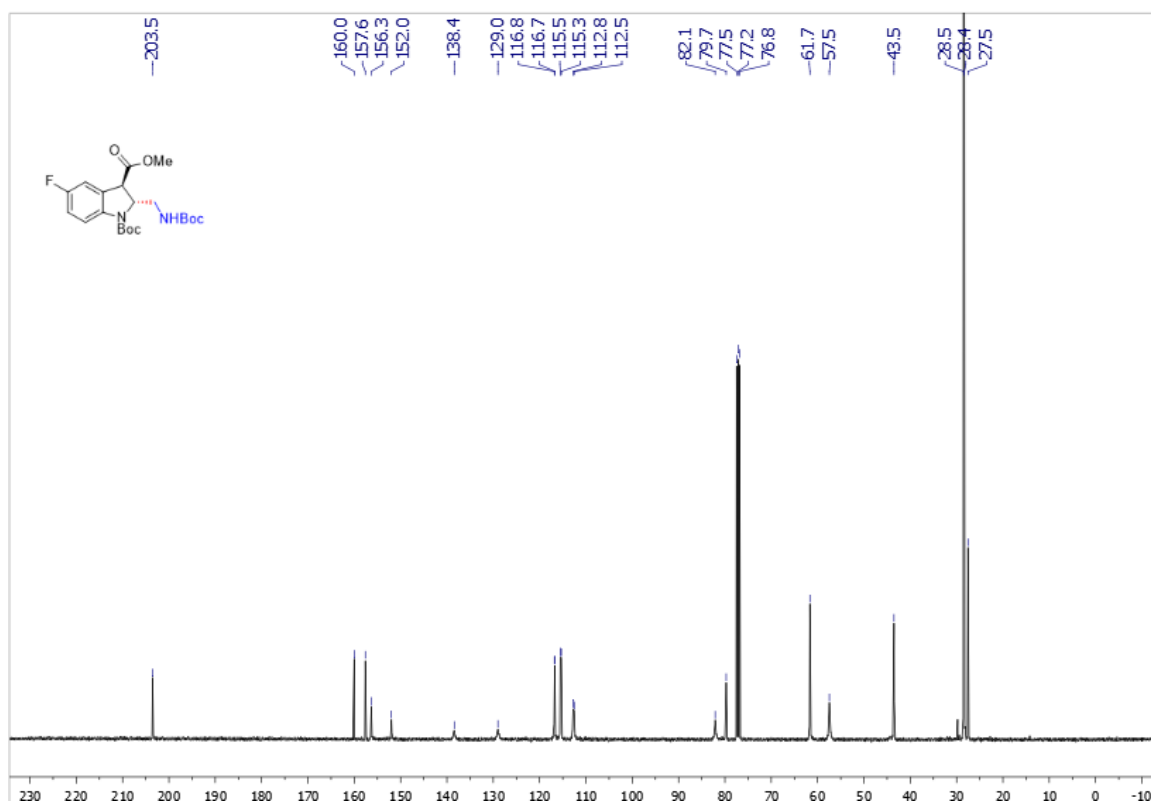

Supplementary Figure 70.  $^{13}\text{C}$  NMR spectra of *trans*-3m

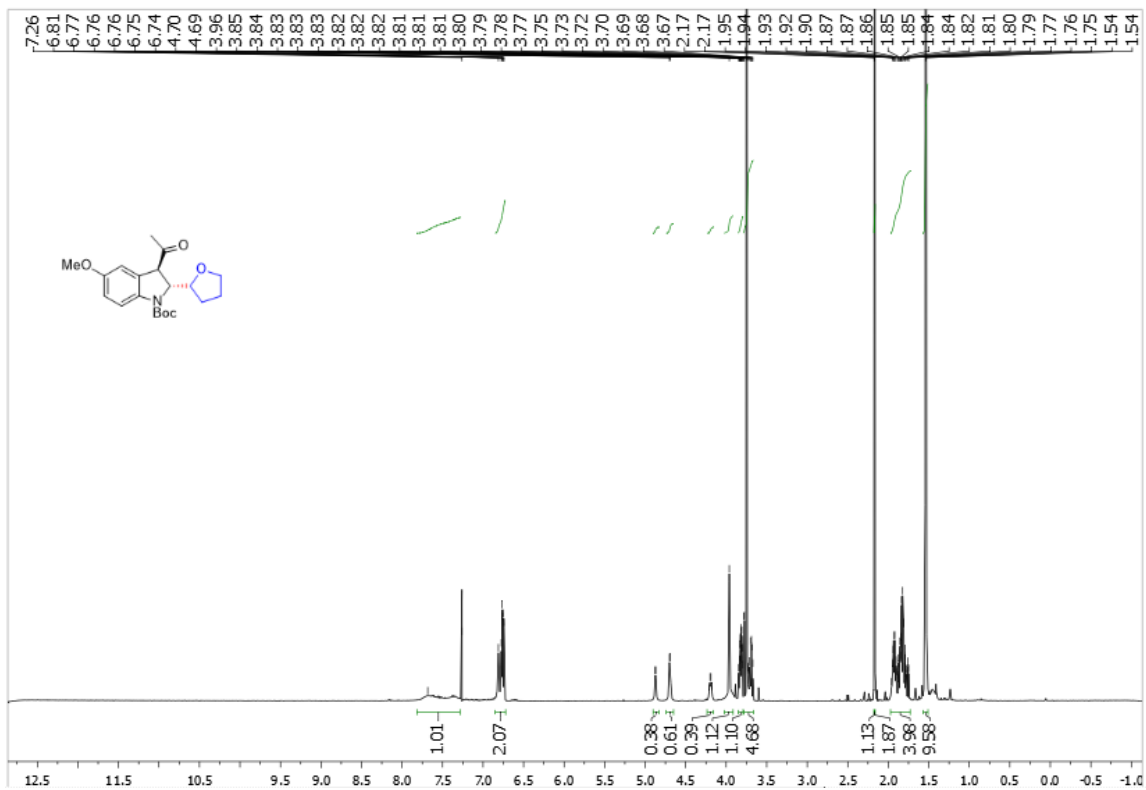

Supplementary Figure 71.  $^1\text{H}$  NMR spectra of *trans*-3n

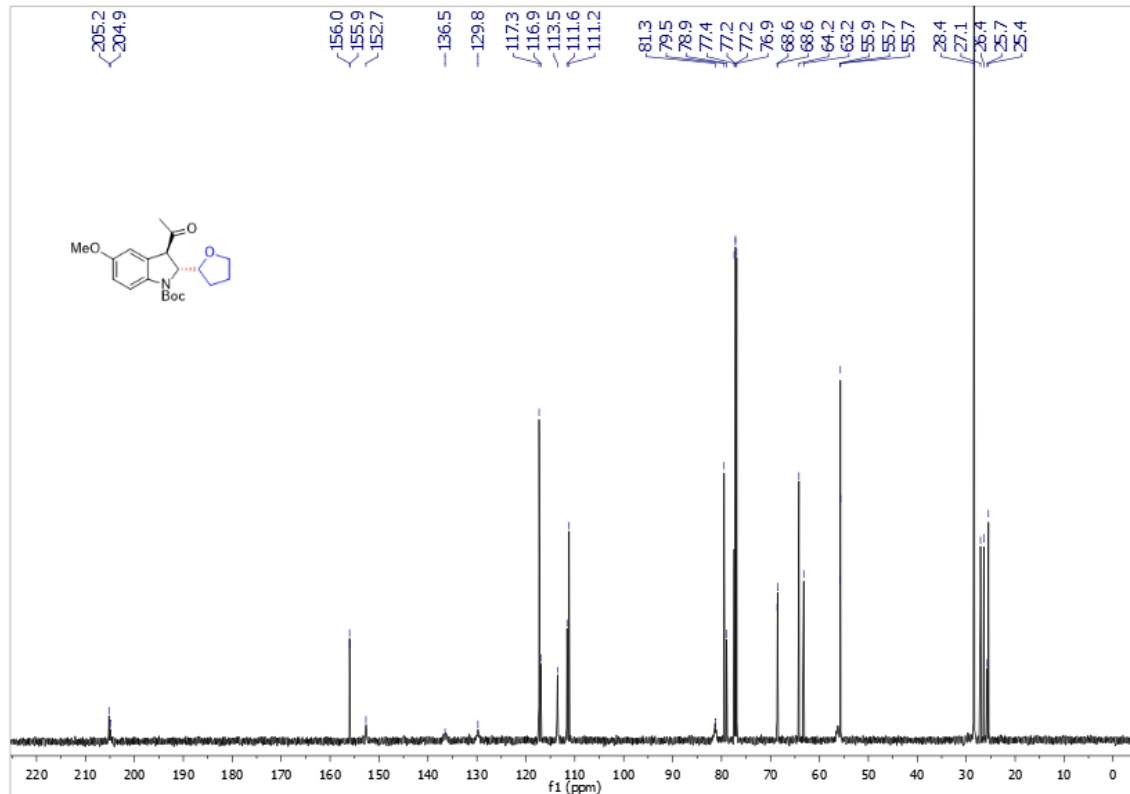

Supplementary Figure 72.  $^{13}\text{C}$  NMR spectra of *trans*-3n

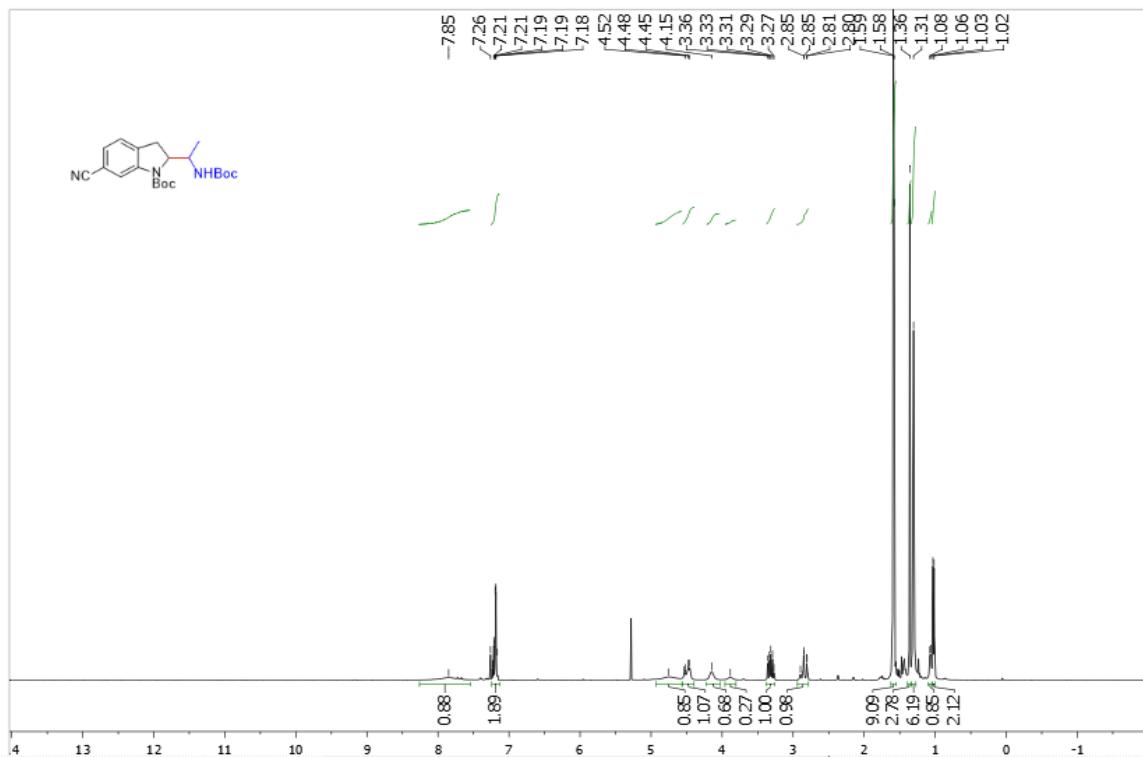

Supplementary Figure 73.  $^1\text{H}$  NMR spectra of 30

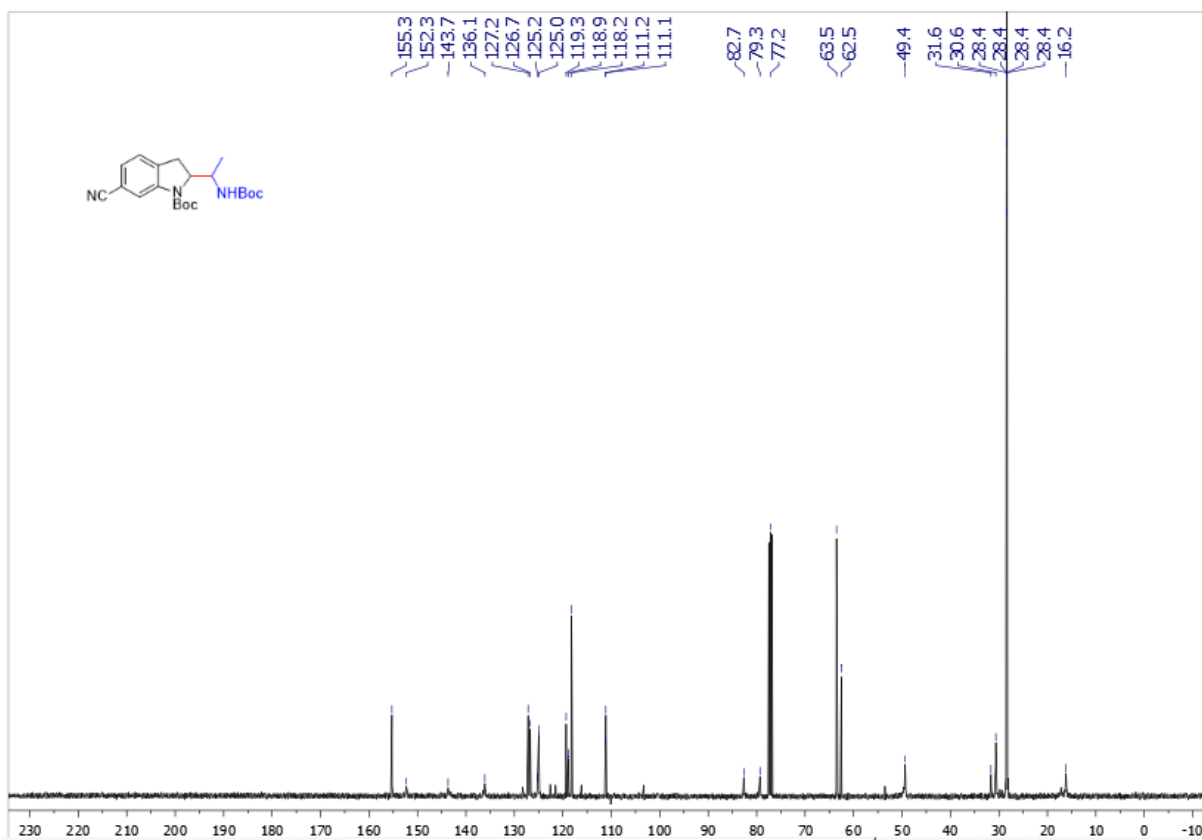

Supplementary Figure 74.  $^{13}\text{C}$  NMR spectra of 30

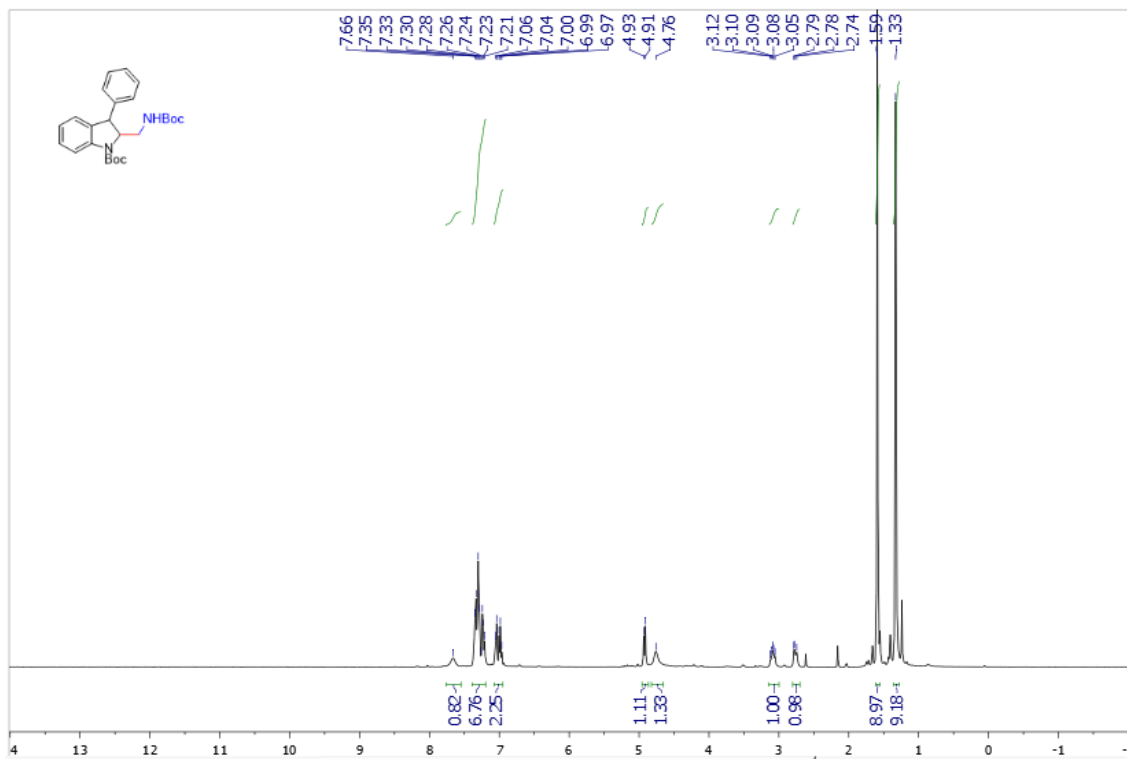

Supplementary Figure 75. <sup>1</sup>H NMR spectra of **3p-isomer-a**

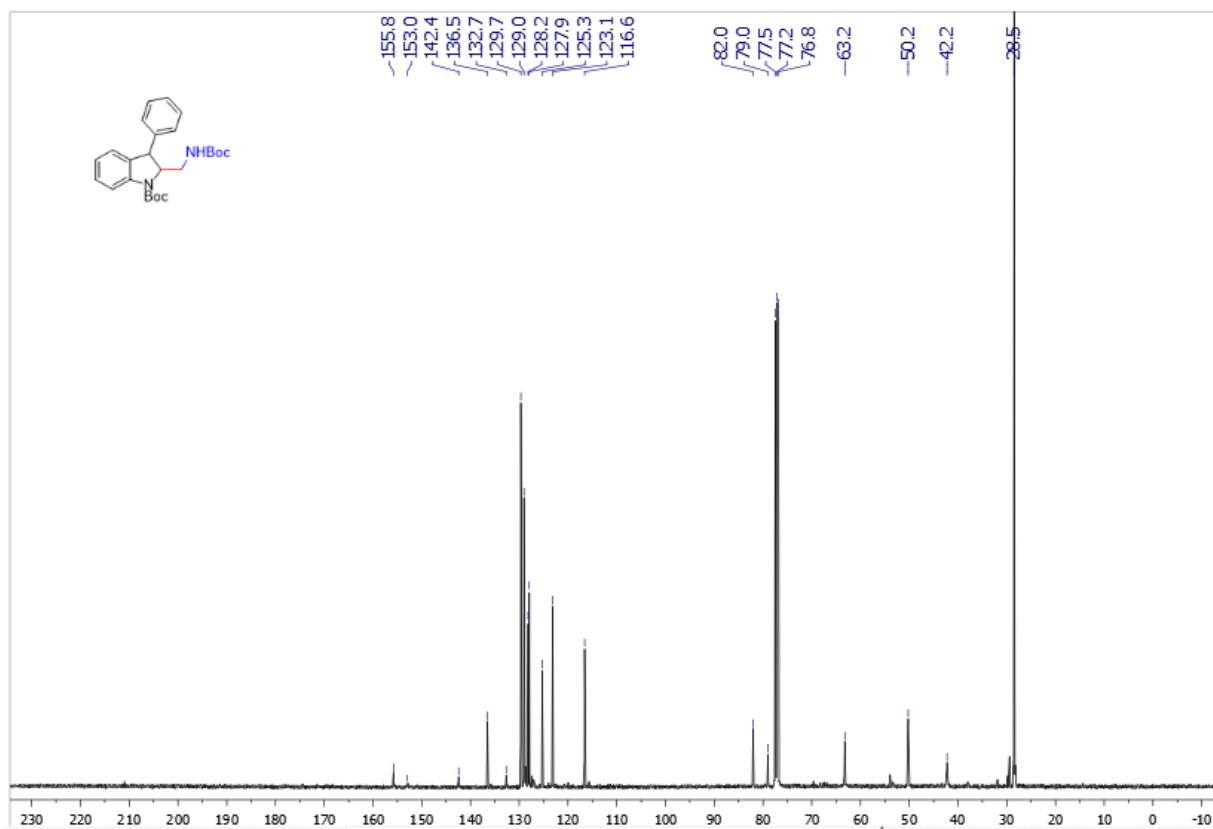

Supplementary Figure 76. <sup>13</sup>C NMR spectra of **3p-isomer-a**

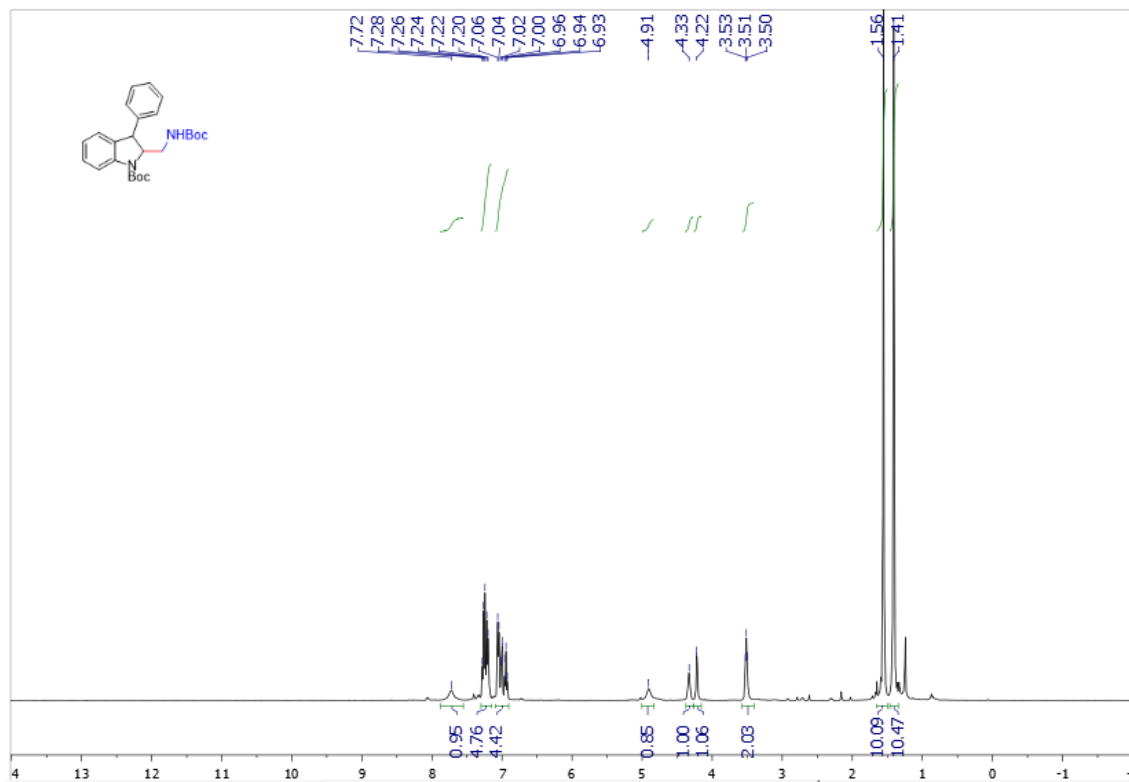

Supplementary Figure 77.  $^1\text{H}$  NMR spectra of 3p-isomer-b

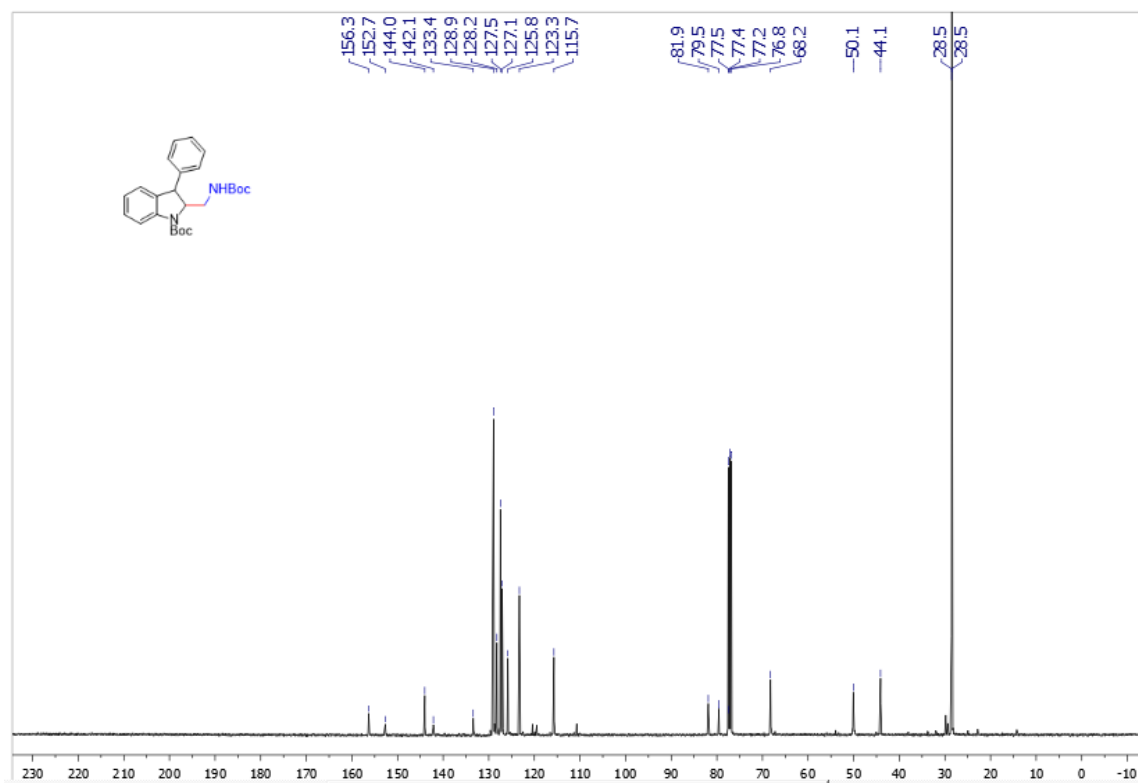

Supplementary Figure 78.  $^{13}\text{C}$  NMR spectra of 3p-isomer-b

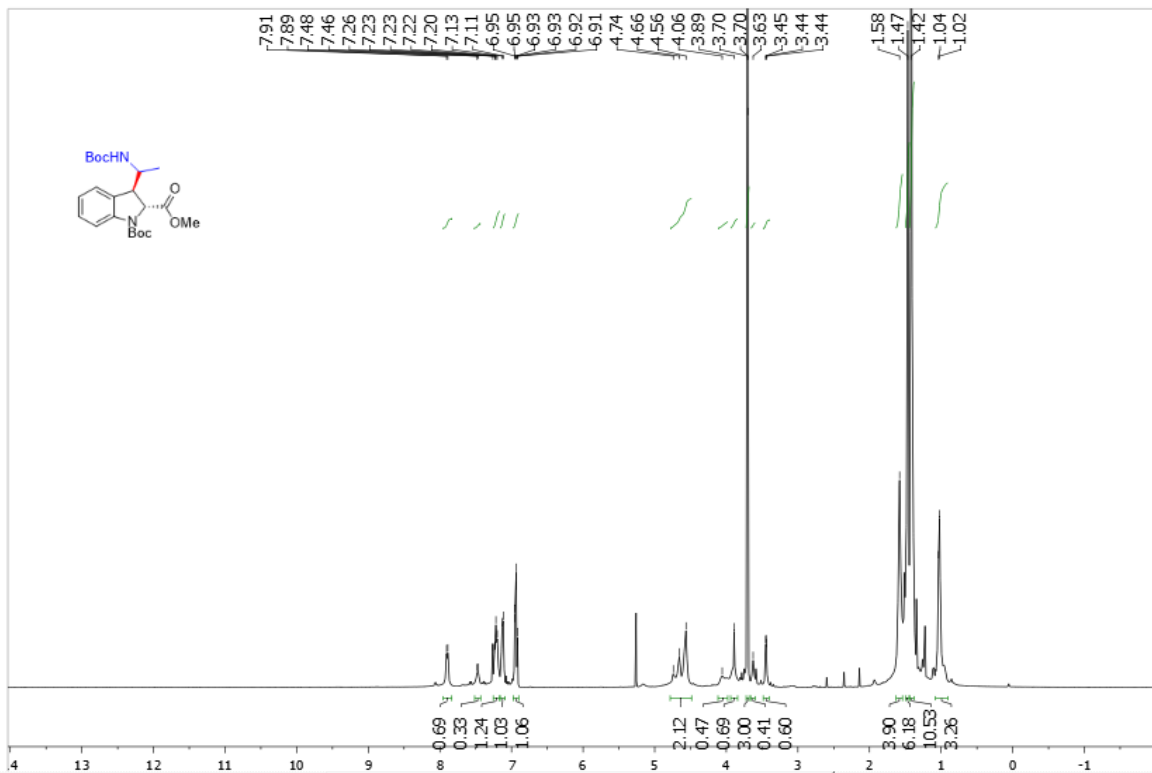

Supplementary Figure 79.  $^1\text{H}$  NMR spectra of *trans*-3q

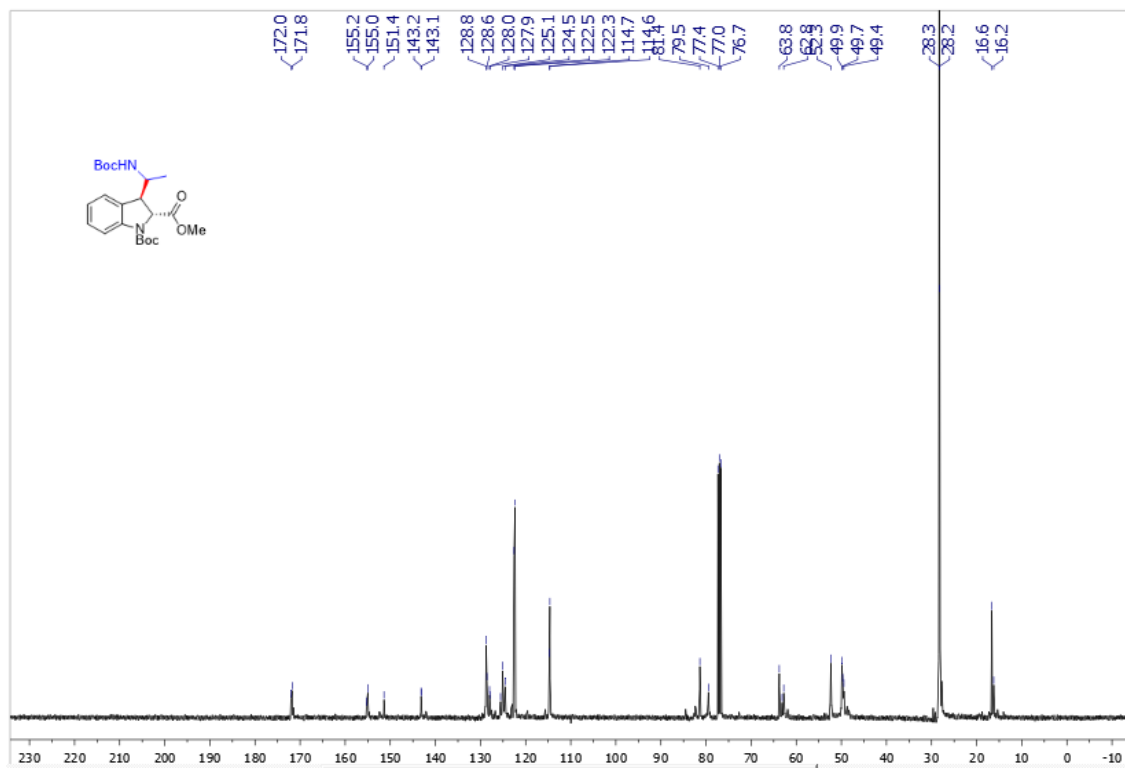

Supplementary Figure 80.  $^{13}\text{C}$  NMR spectra of *trans*-3q



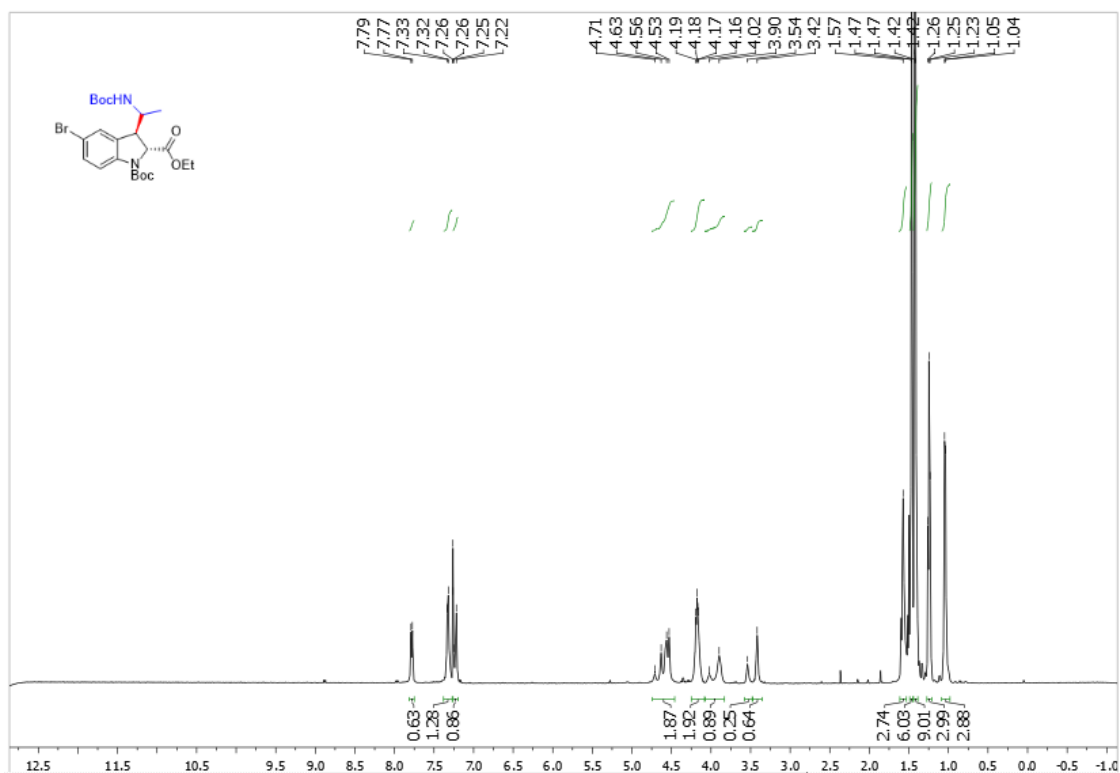

Supplementary Figure 81. <sup>1</sup>H NMR spectra of *trans*-3r

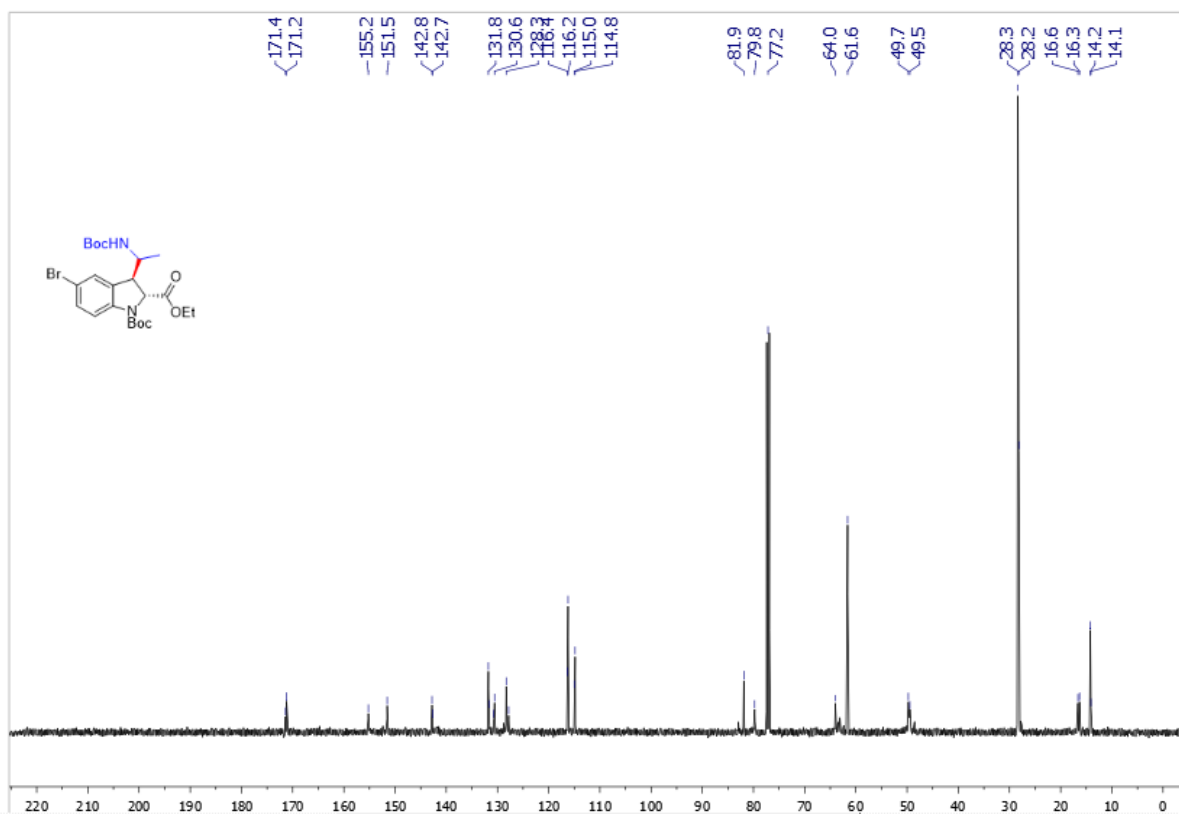

Supplementary Figure 82. <sup>13</sup>C NMR spectra of *trans*-3r

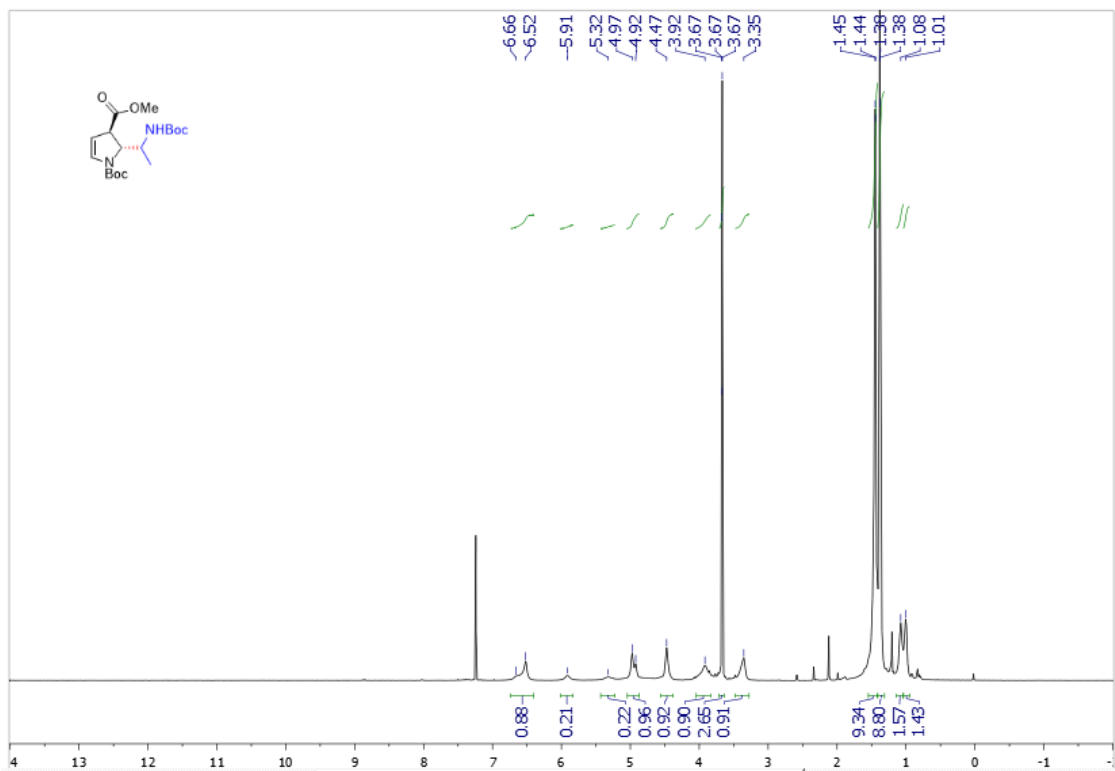

Supplementary Figure 83.  $^1\text{H}$  NMR spectra of *trans*-3s

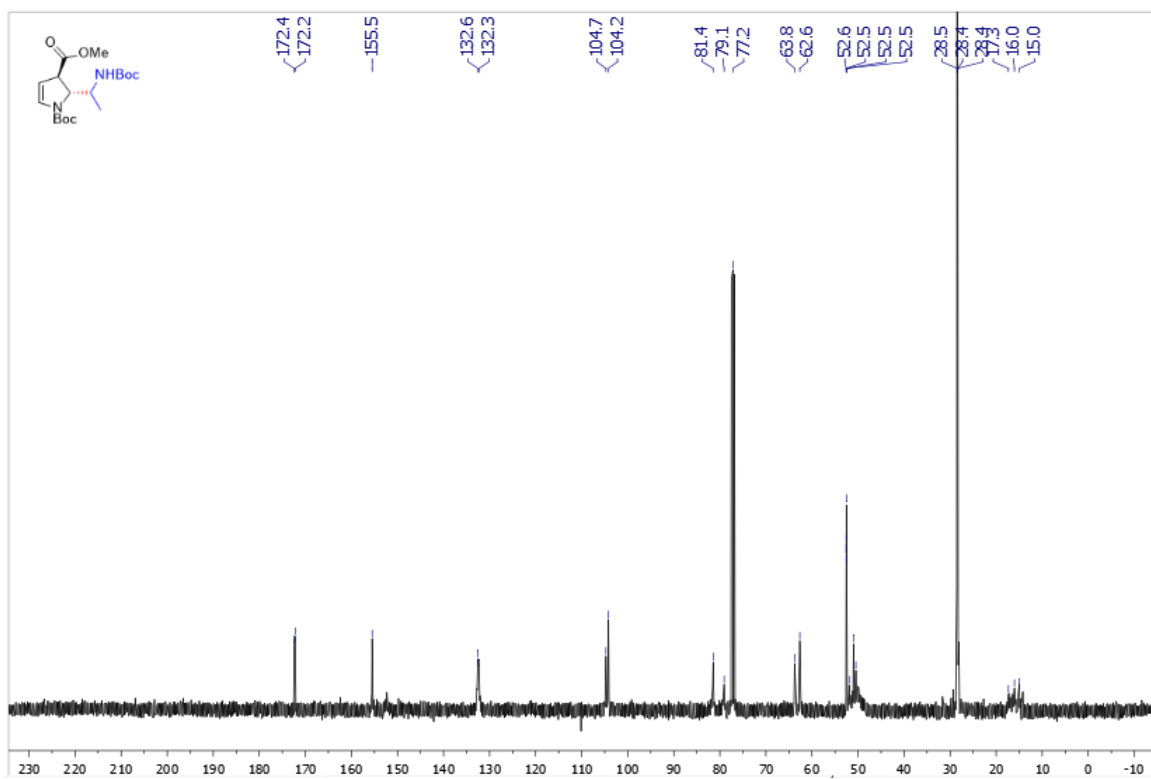

Supplementary Figure 84.  $^{13}\text{C}$  NMR spectra of *trans*-3s

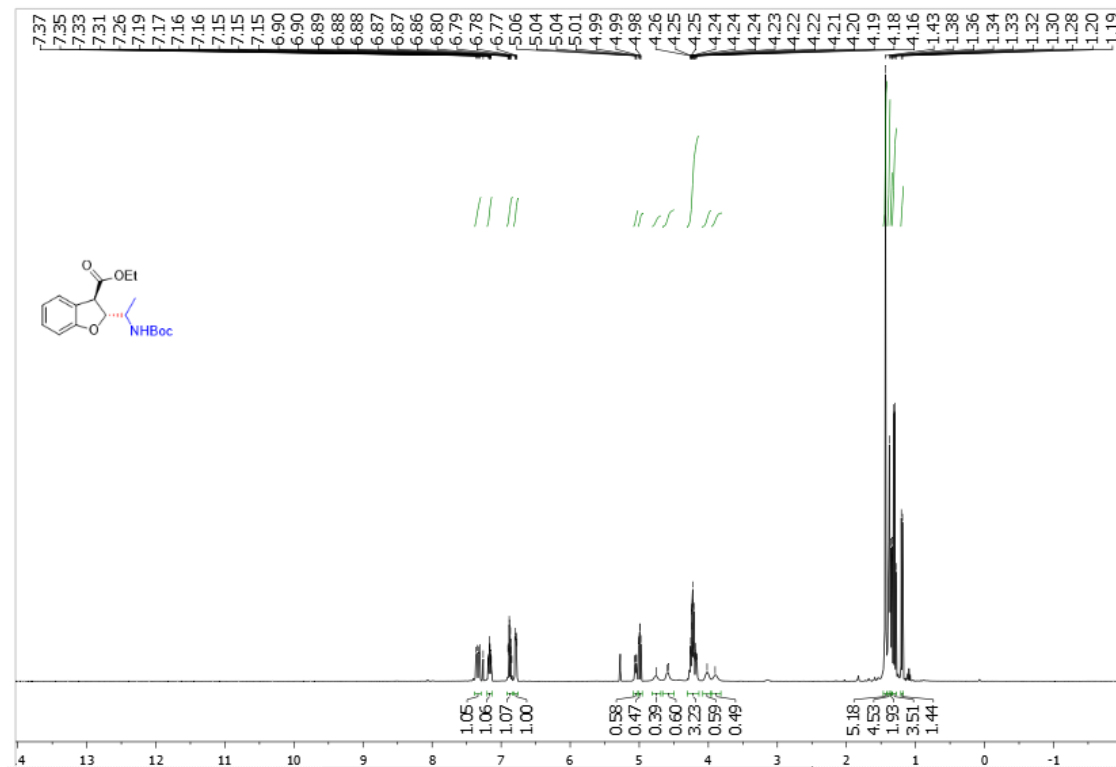

Supplementary Figure 85.  $^1\text{H}$  NMR spectra of *trans*-3t

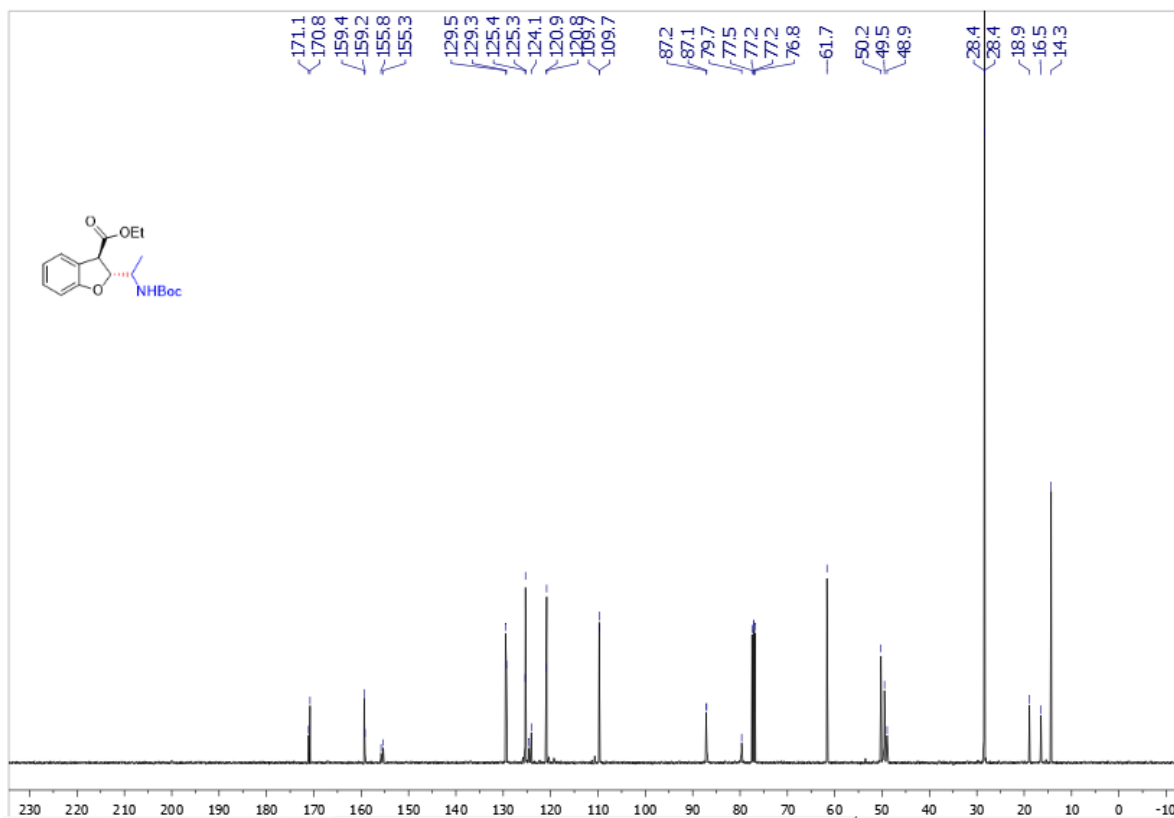

Supplementary Figure 86.  $^{13}\text{C}$  NMR spectra of *trans*-3t

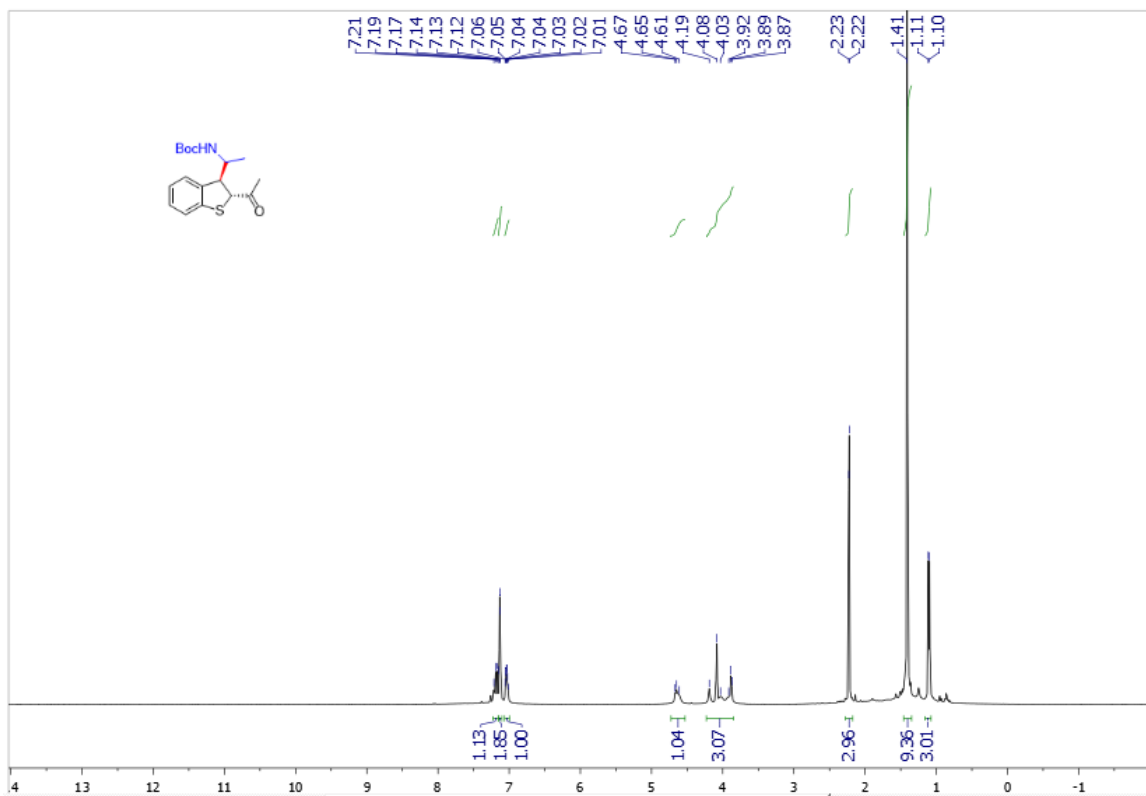

Supplementary Figure 87.  $^1\text{H}$  NMR spectra of *trans*-3u

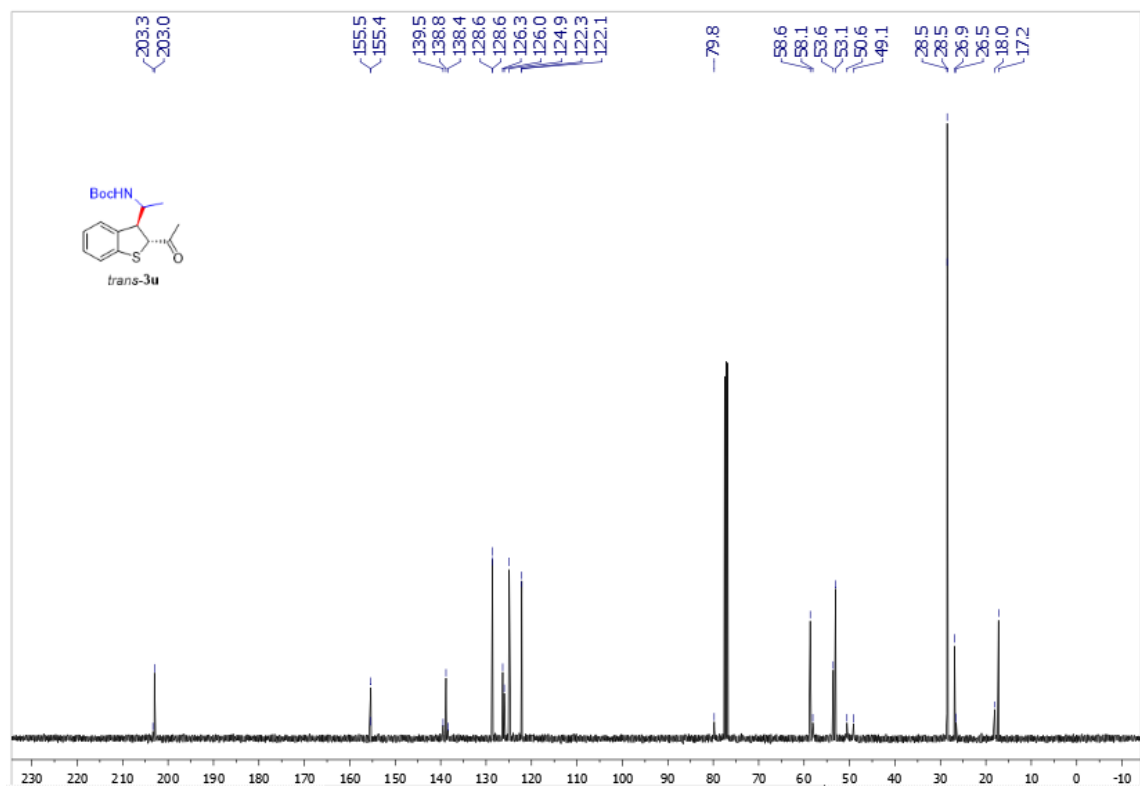

Supplementary Figure 88.  $^{13}\text{C}$  NMR spectra of *trans*-3u

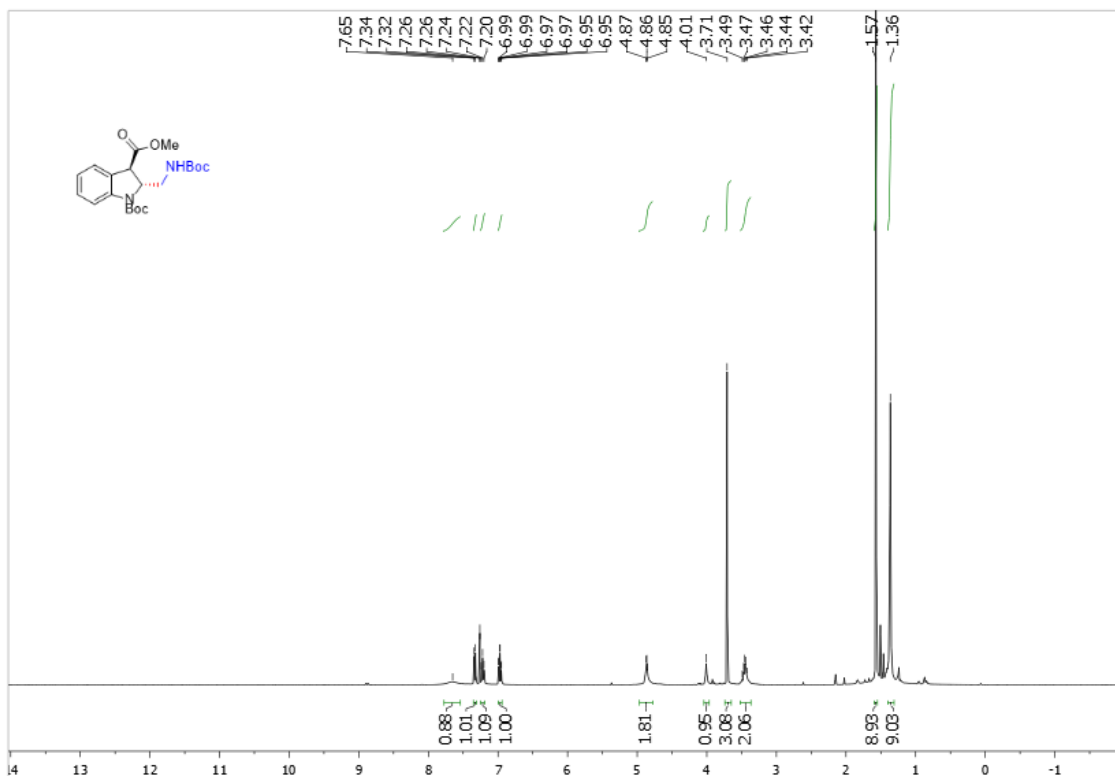

Supplementary Figure 89.  $^1\text{H}$  NMR spectra of *trans*-3v

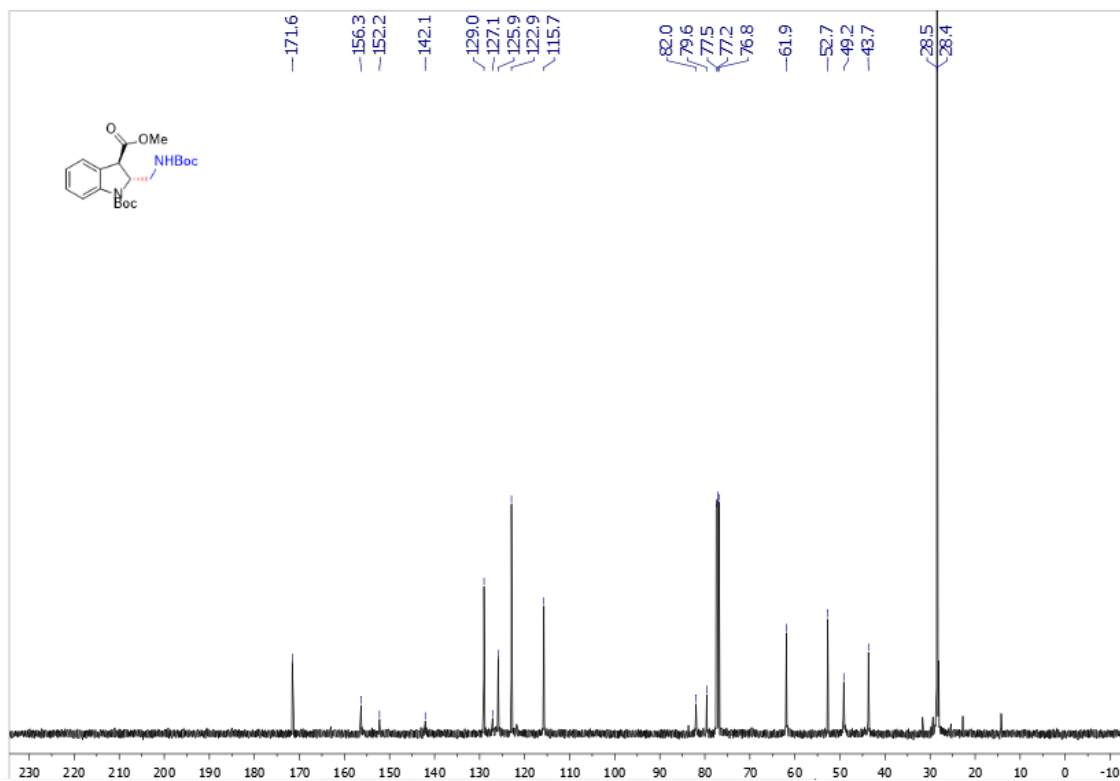

Supplementary Figure 90.  $^{13}\text{C}$  NMR spectra of *trans*-3v

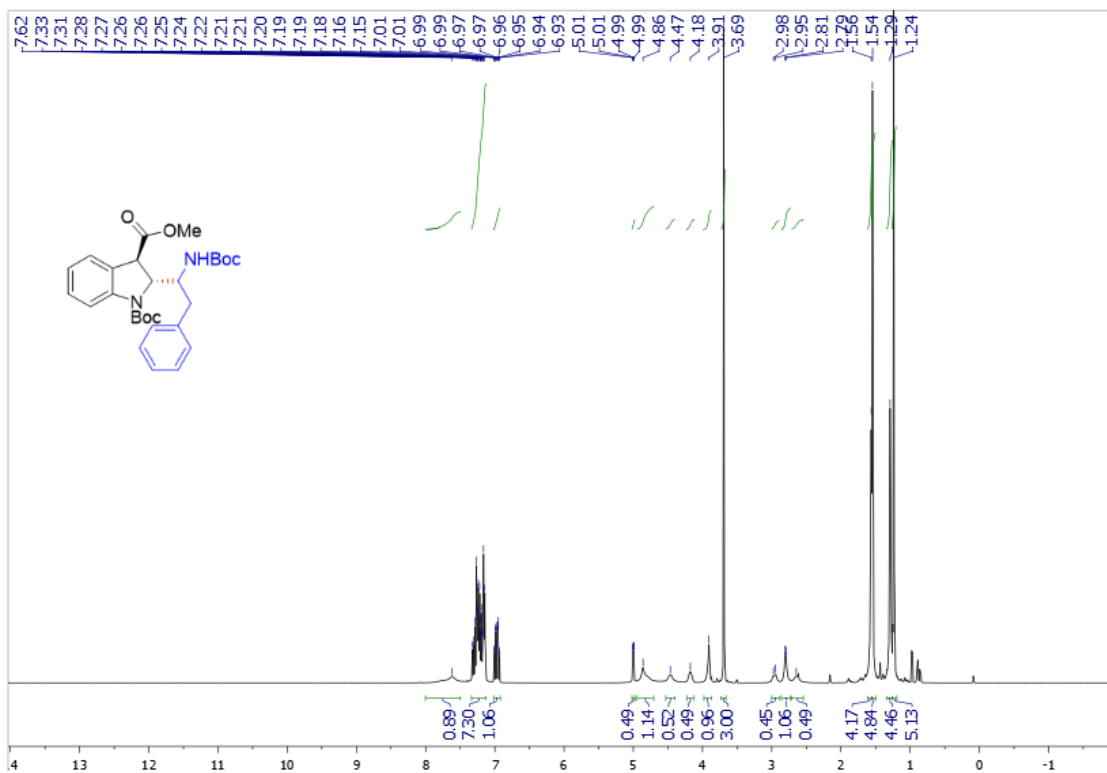

Supplementary Figure 91. <sup>1</sup>H NMR spectra of *trans*-3w

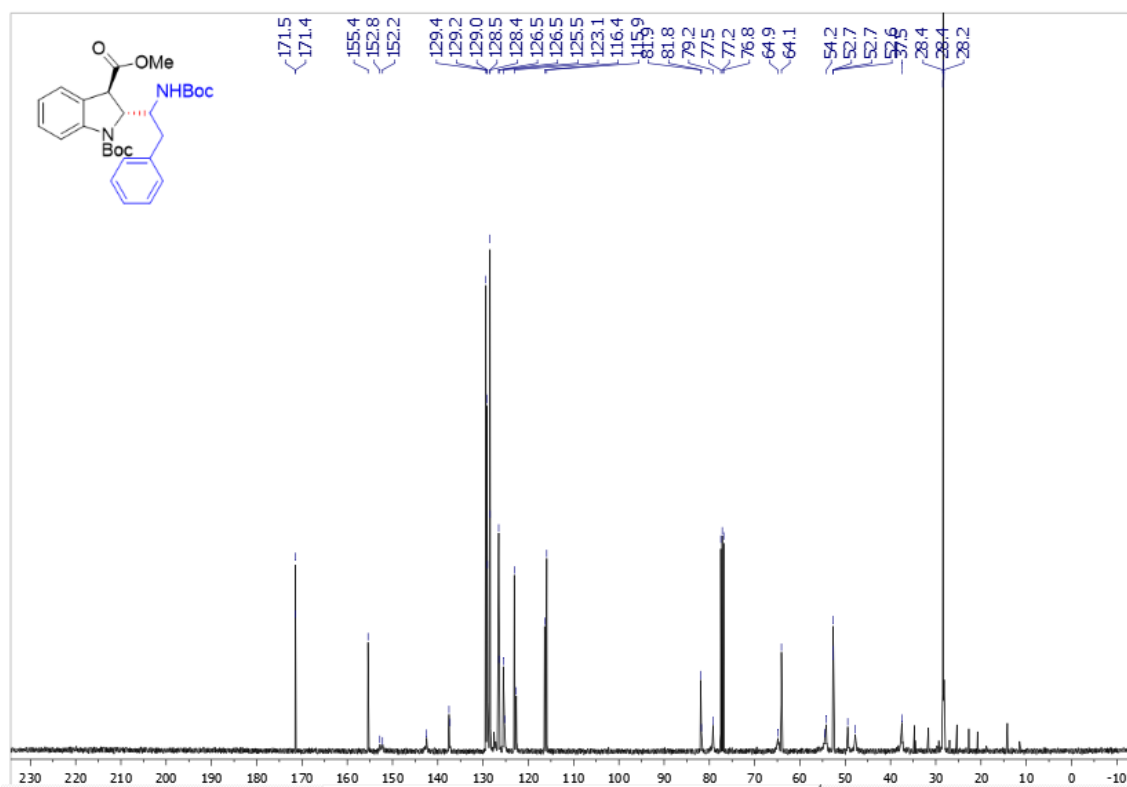

Supplementary Figure 92. <sup>13</sup>C NMR spectra of *trans*-3w

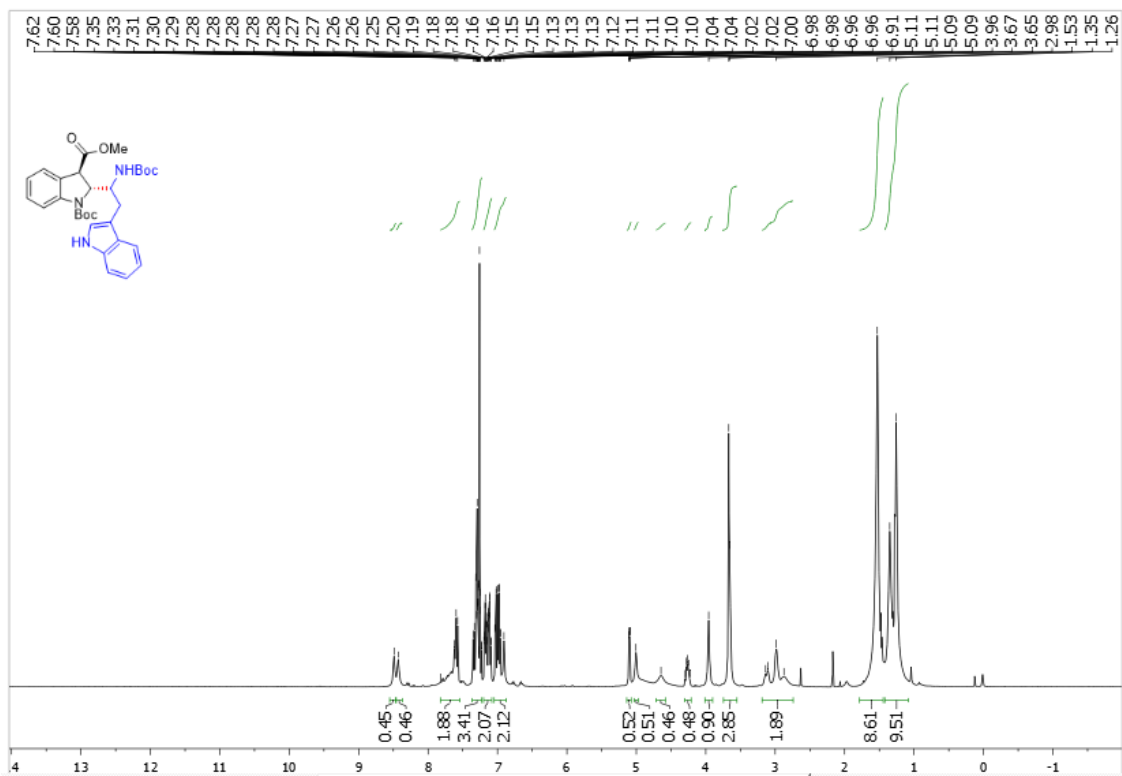

Supplementary Figure 93.  $^1\text{H}$  NMR spectra of *trans*-3x

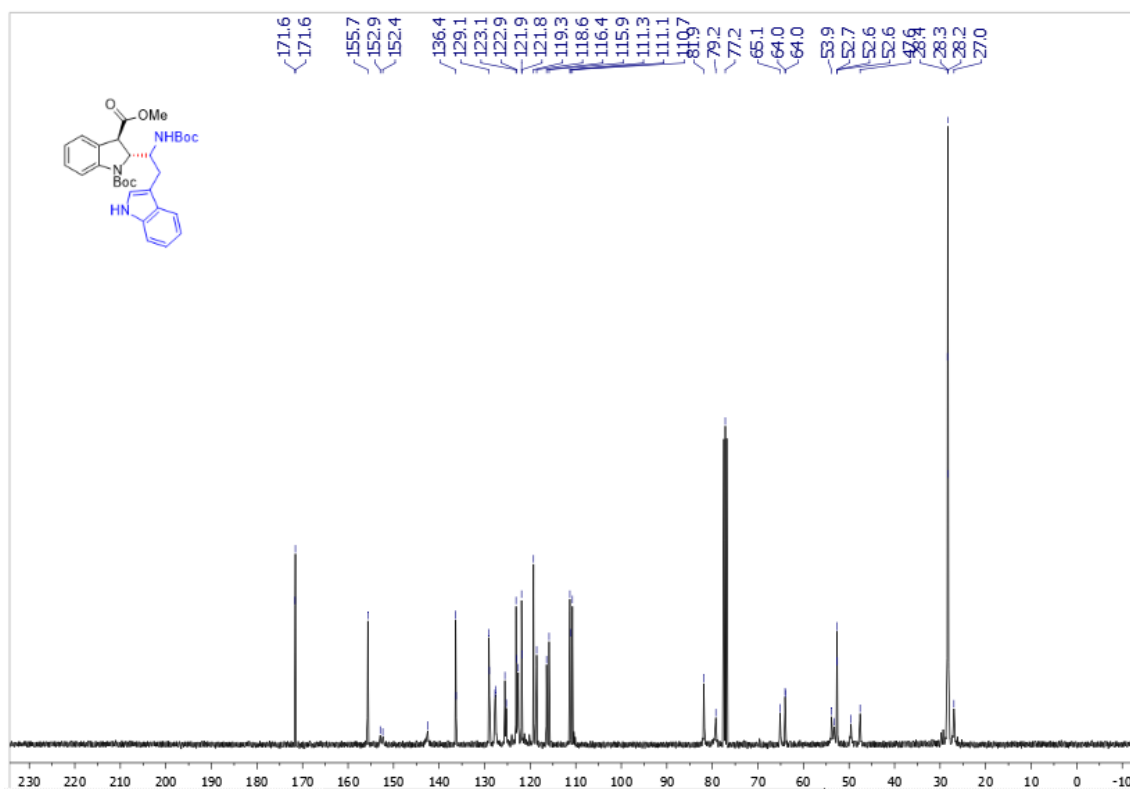

Supplementary Figure 94.  $^{13}\text{C}$  NMR spectra of *trans*-3x

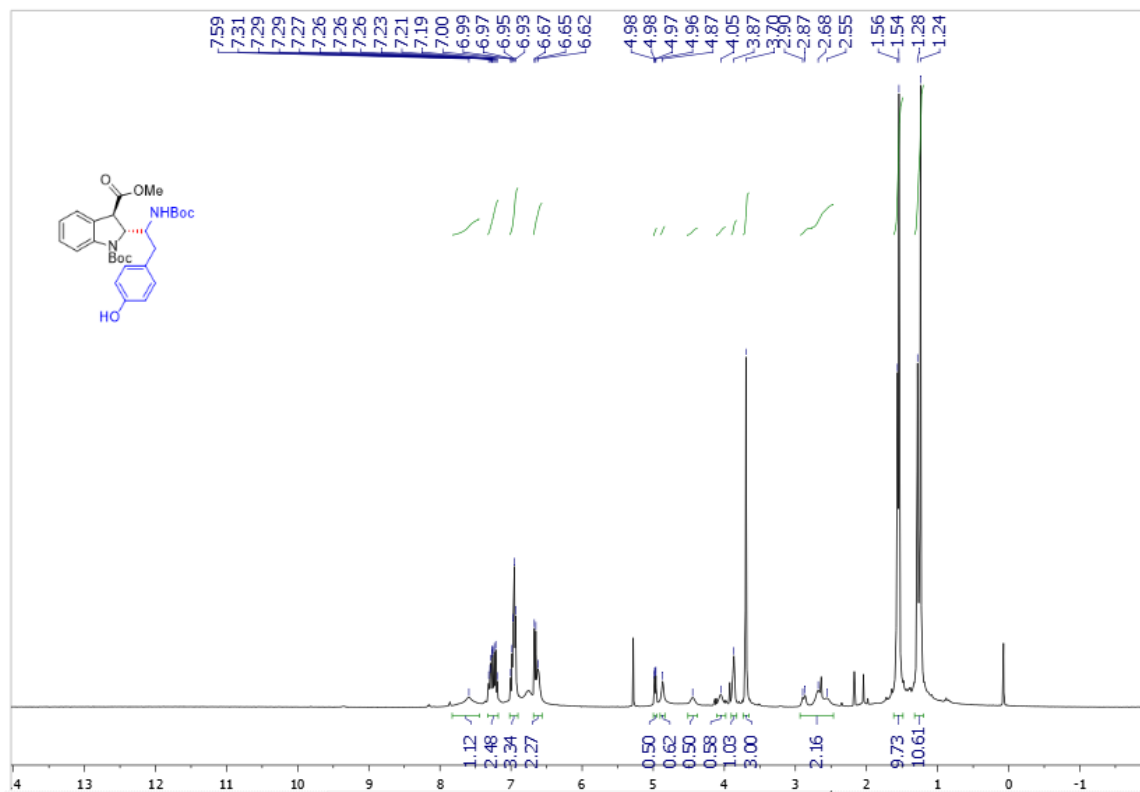

Supplementary Figure 95. <sup>1</sup>H NMR spectra of *trans*-3y

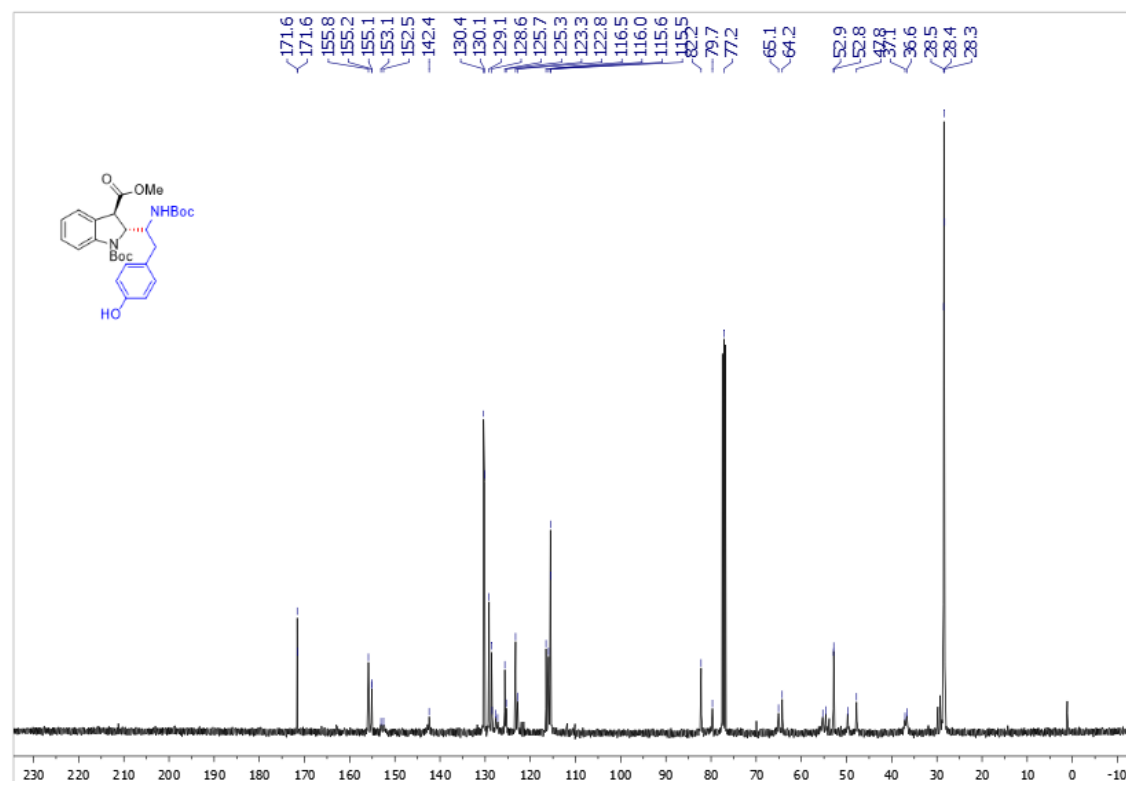

Supplementary Figure 96. <sup>13</sup>C NMR spectra of *trans*-3y



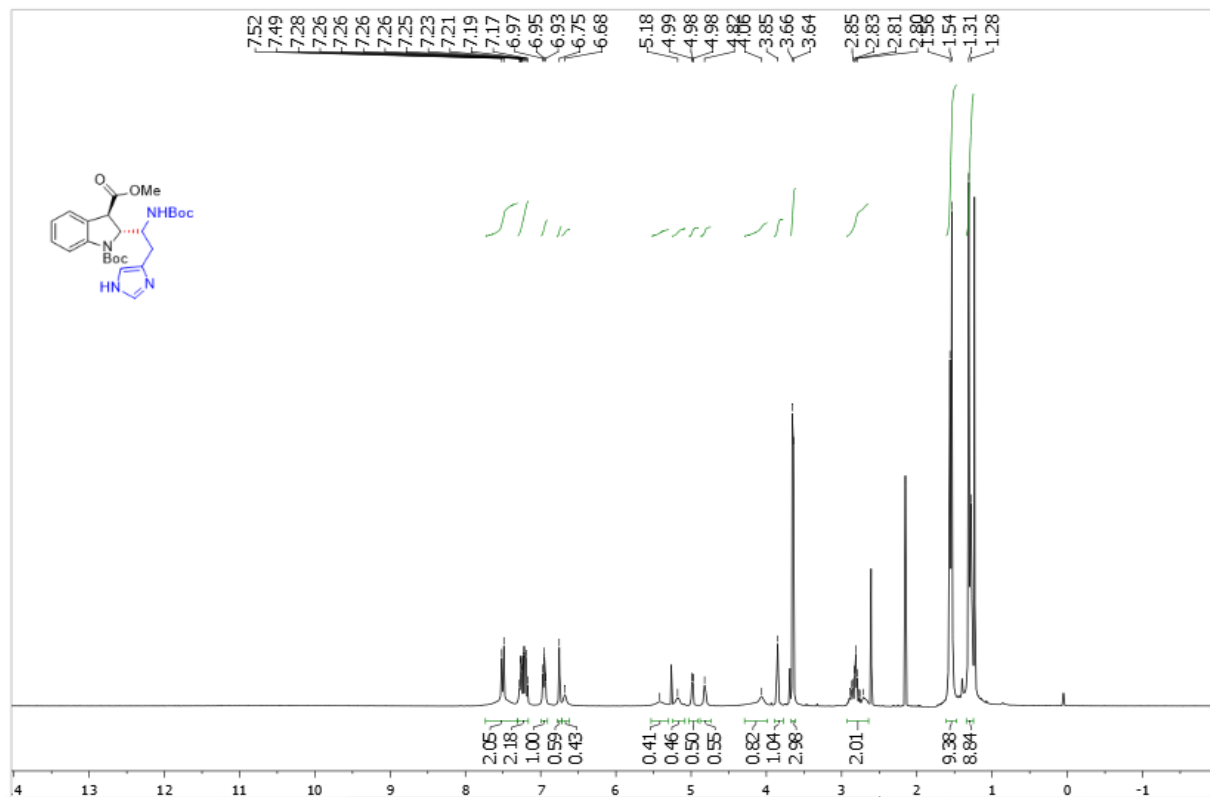

Supplementary Figure 97. <sup>1</sup>H NMR spectra of *trans*-3z

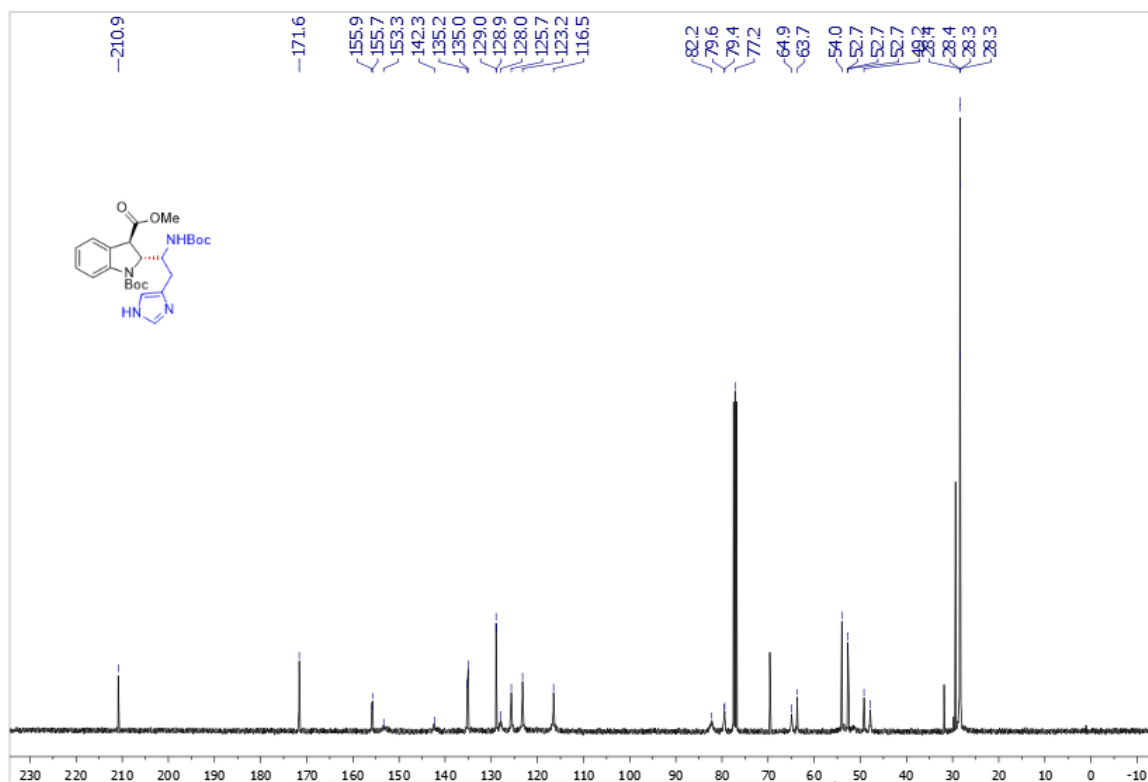

Supplementary Figure 98. <sup>13</sup>C NMR spectra of *trans*-3z

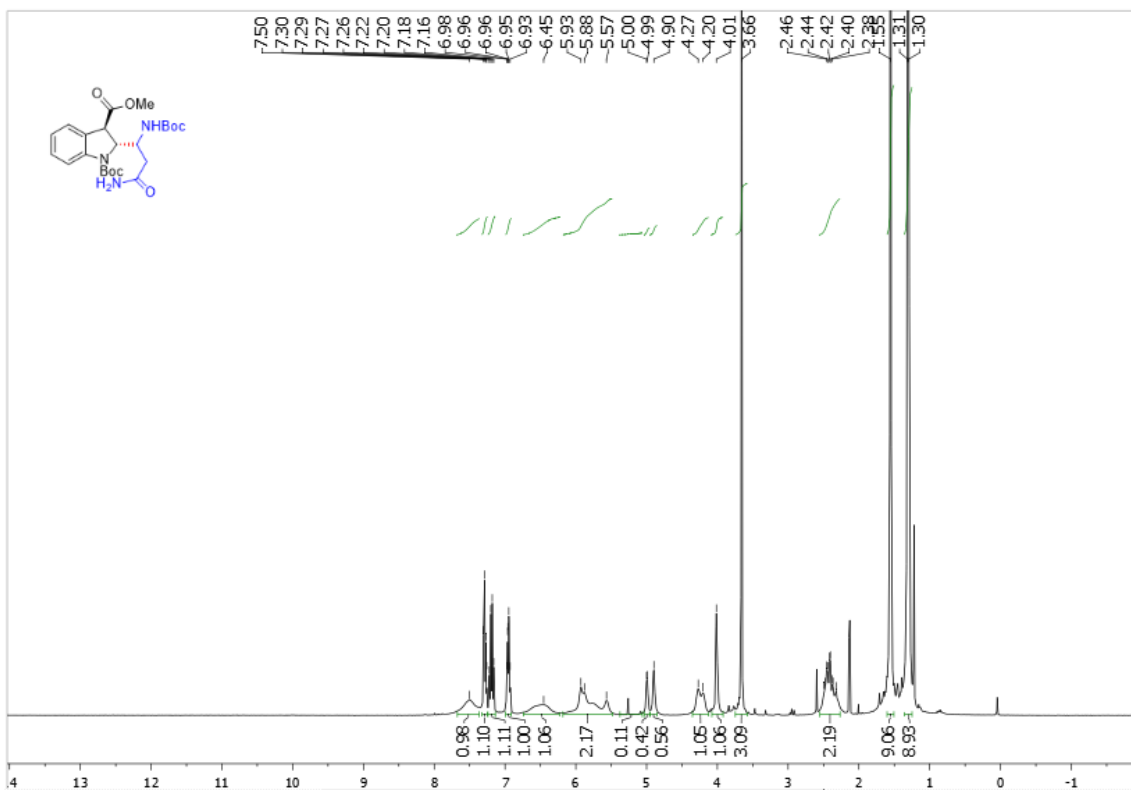

Supplementary Figure 99. <sup>1</sup>H NMR spectra of *trans*-3aa

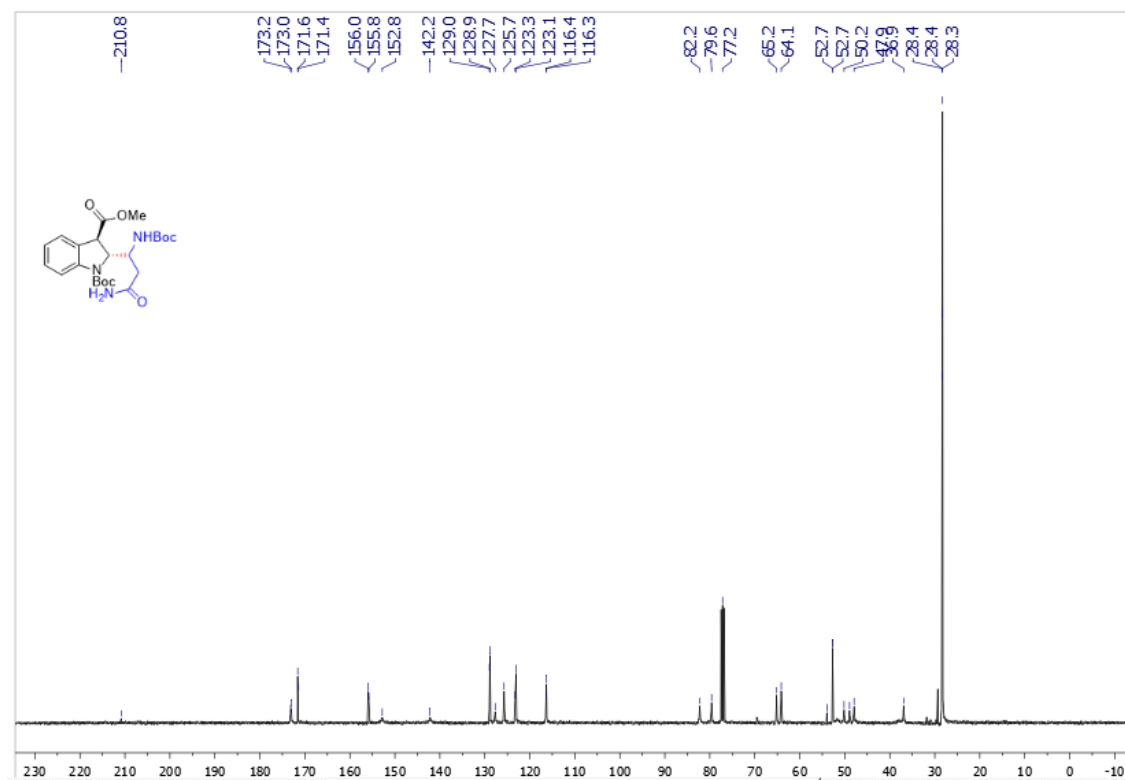

Supplementary Figure 100. <sup>13</sup>C NMR spectra of *trans*-3aa

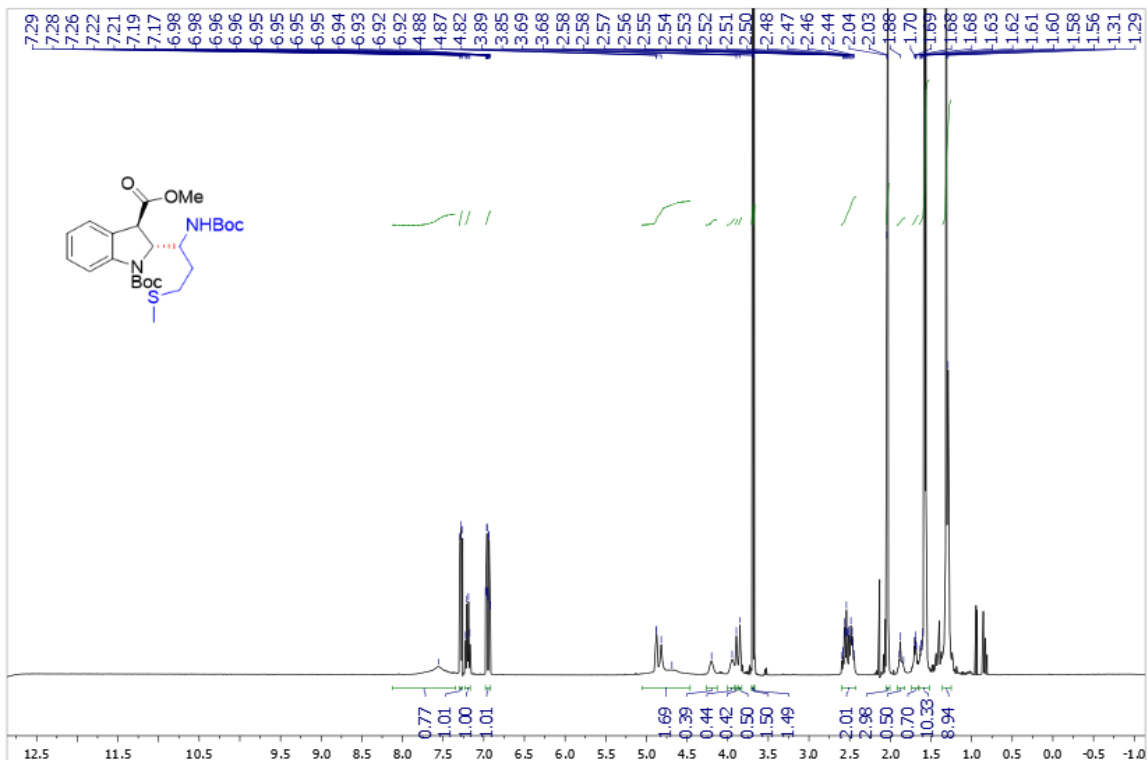

Supplementary Figure 101. <sup>1</sup>H NMR spectra of *trans*-3ab

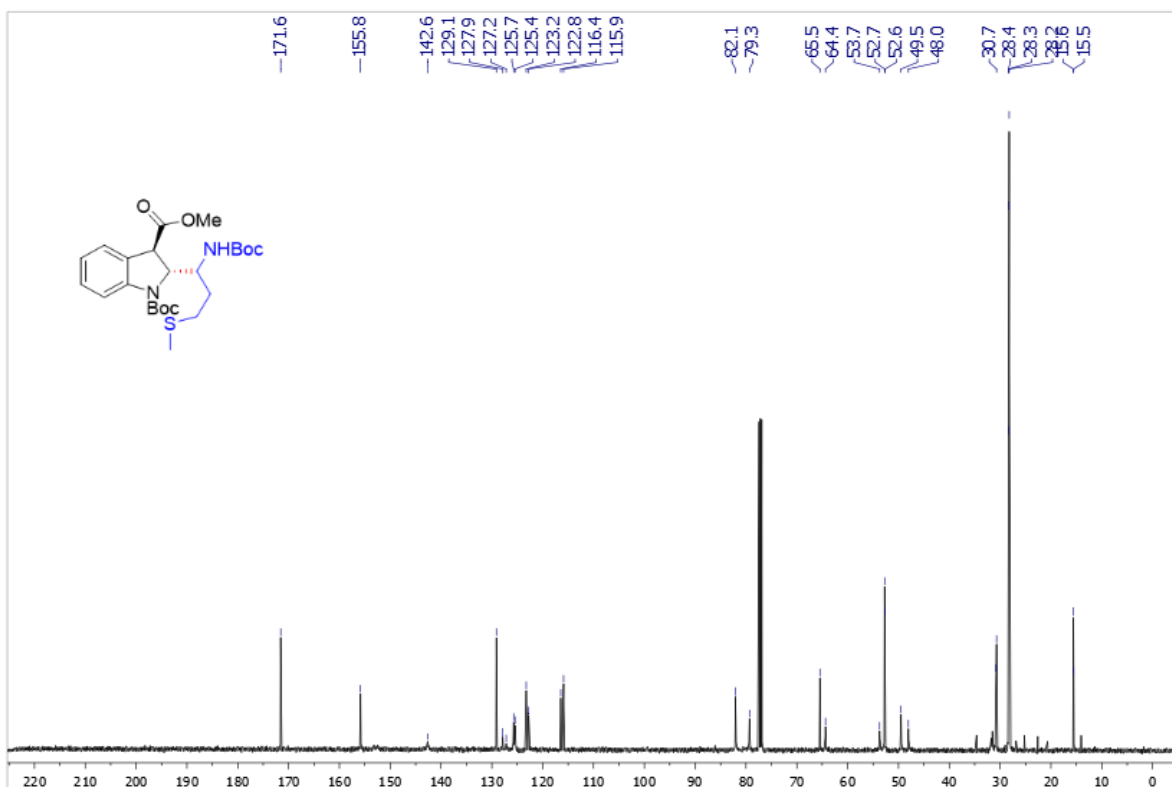

Supplementary Figure 102. <sup>13</sup>C NMR spectra of *trans*-3ab

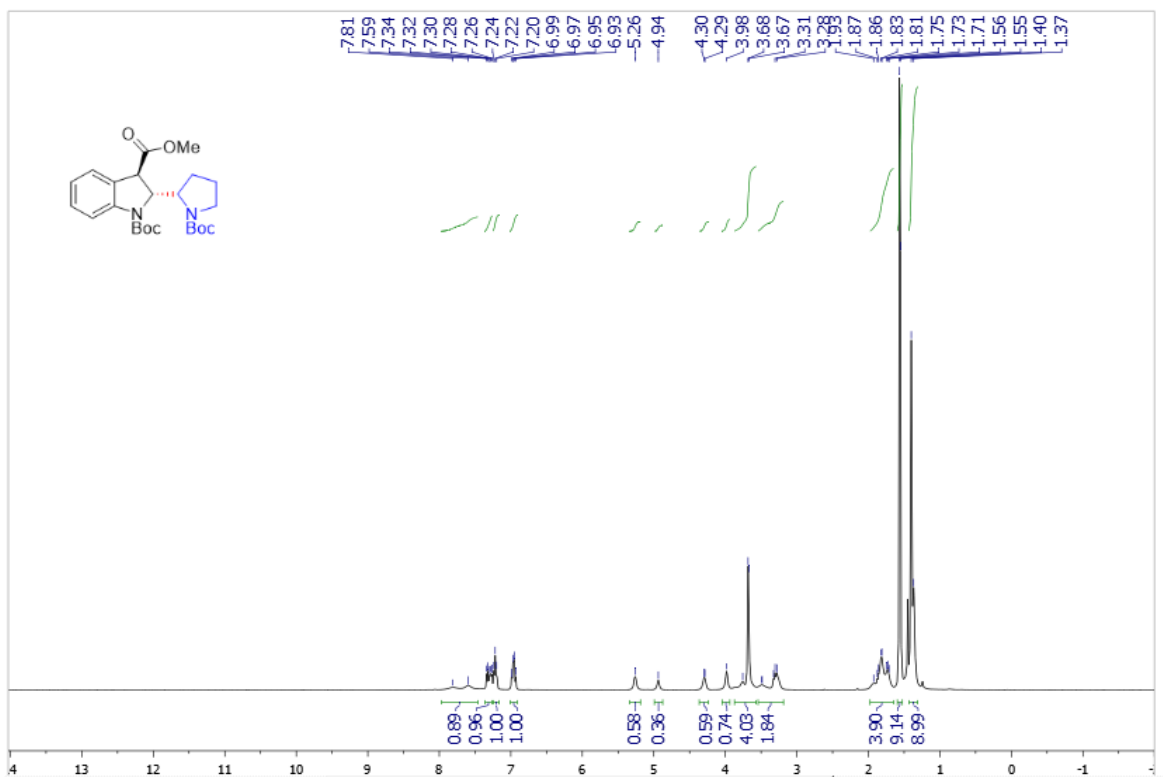

Supplementary Figure 103.  $^1\text{H}$  NMR spectra of *trans*-3ac

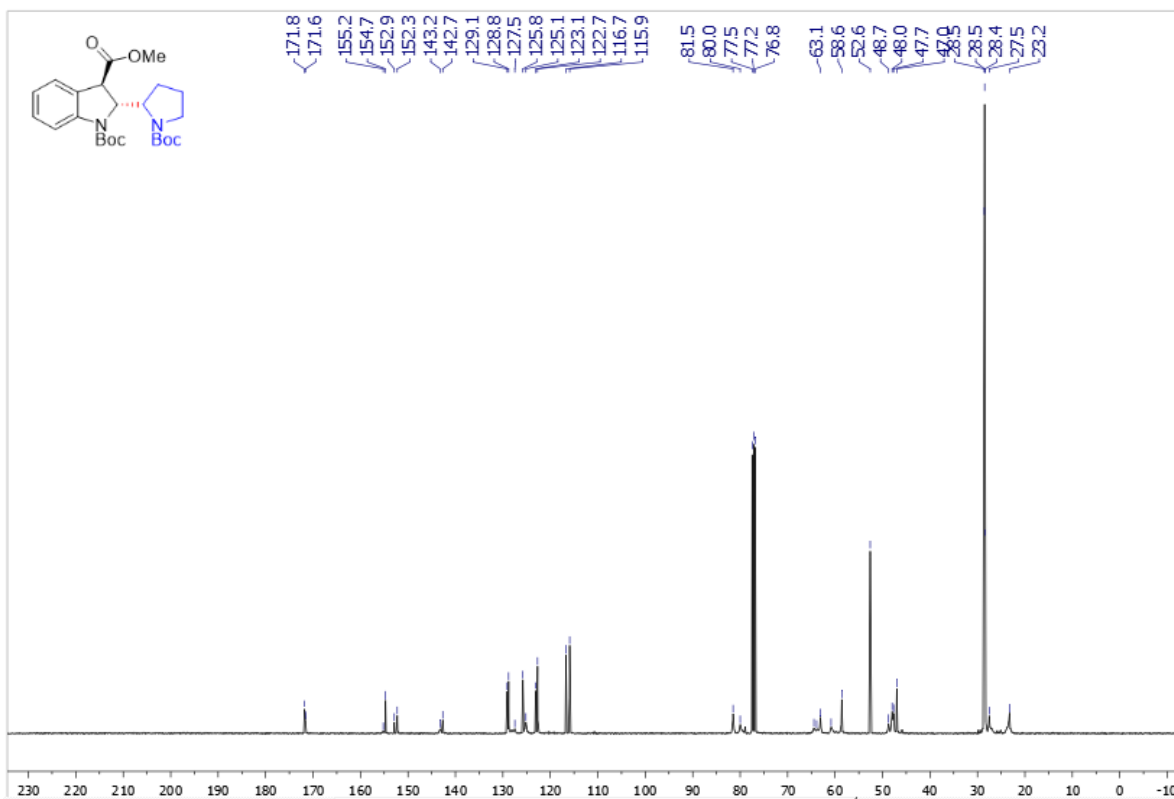

Supplementary Figure 104.  $^{13}\text{C}$  NMR spectra of *trans*-3ac

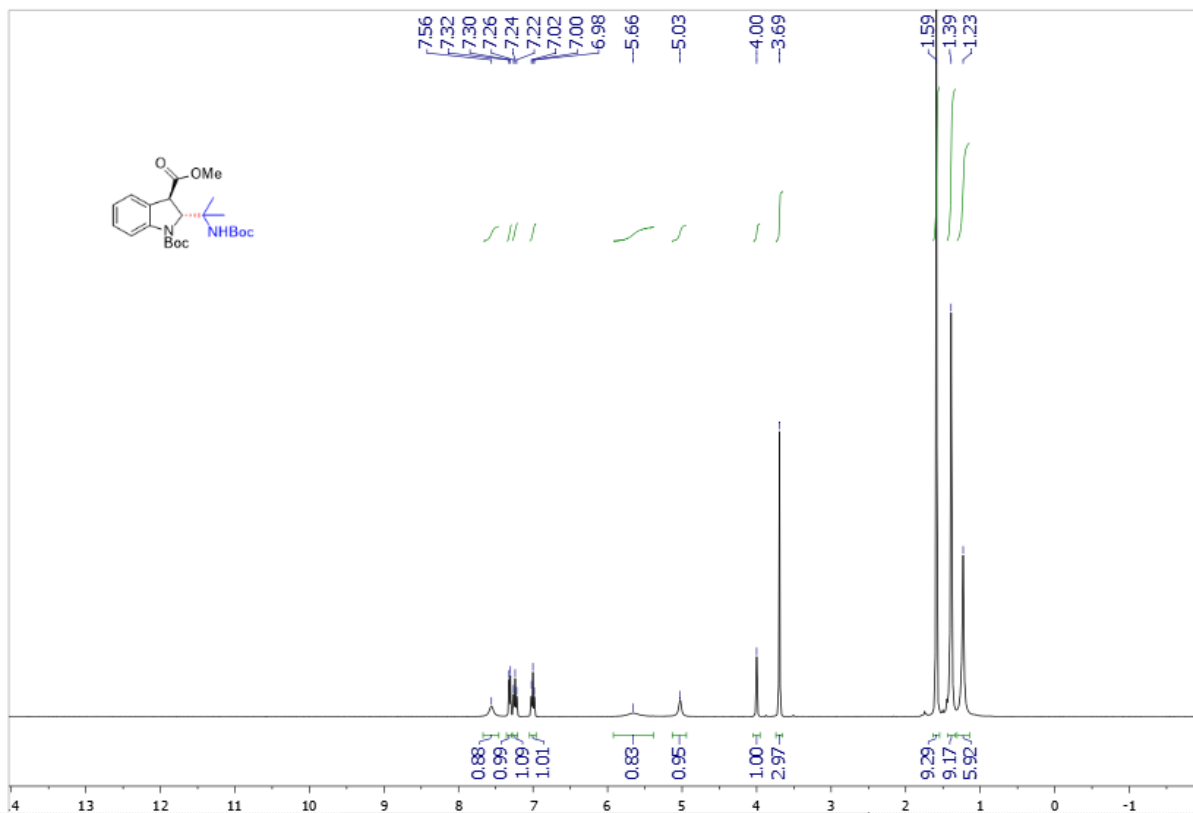

Supplementary Figure 105.  $^1\text{H}$  NMR spectra of *trans*-3ad

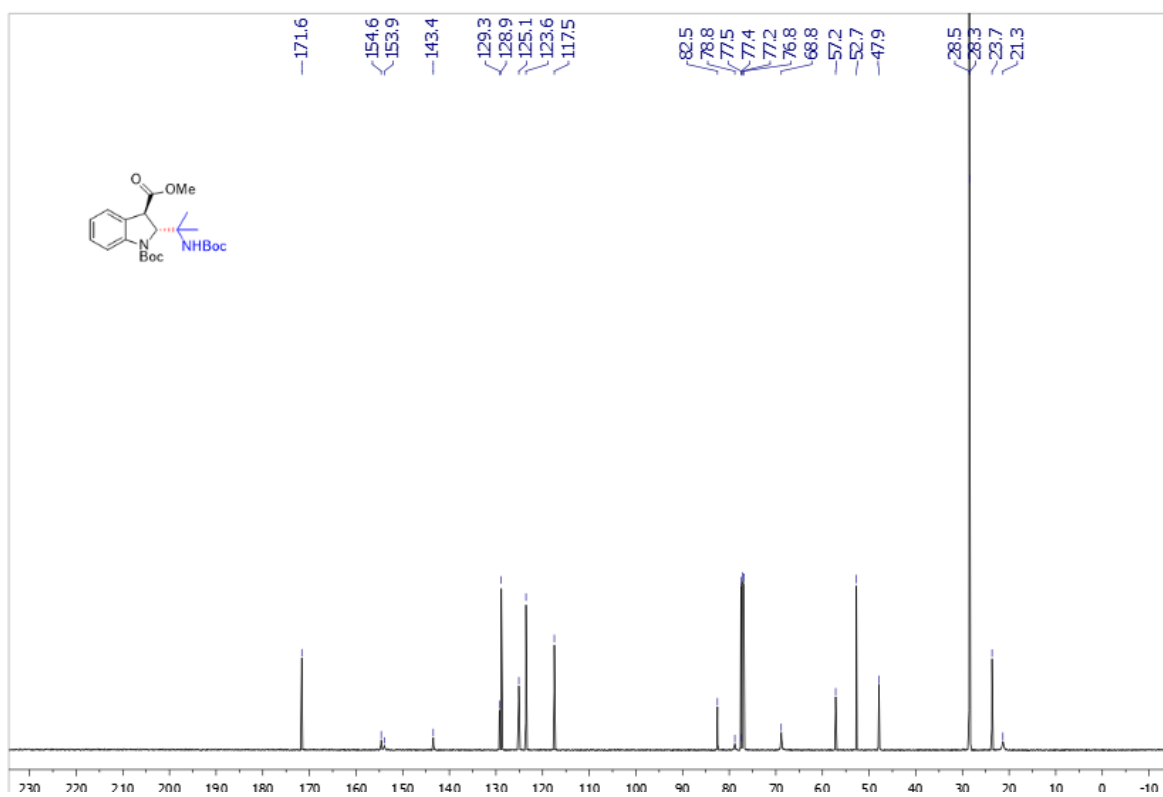

Supplementary Figure 106.  $^{13}\text{C}$  NMR spectra of *trans*-3ad

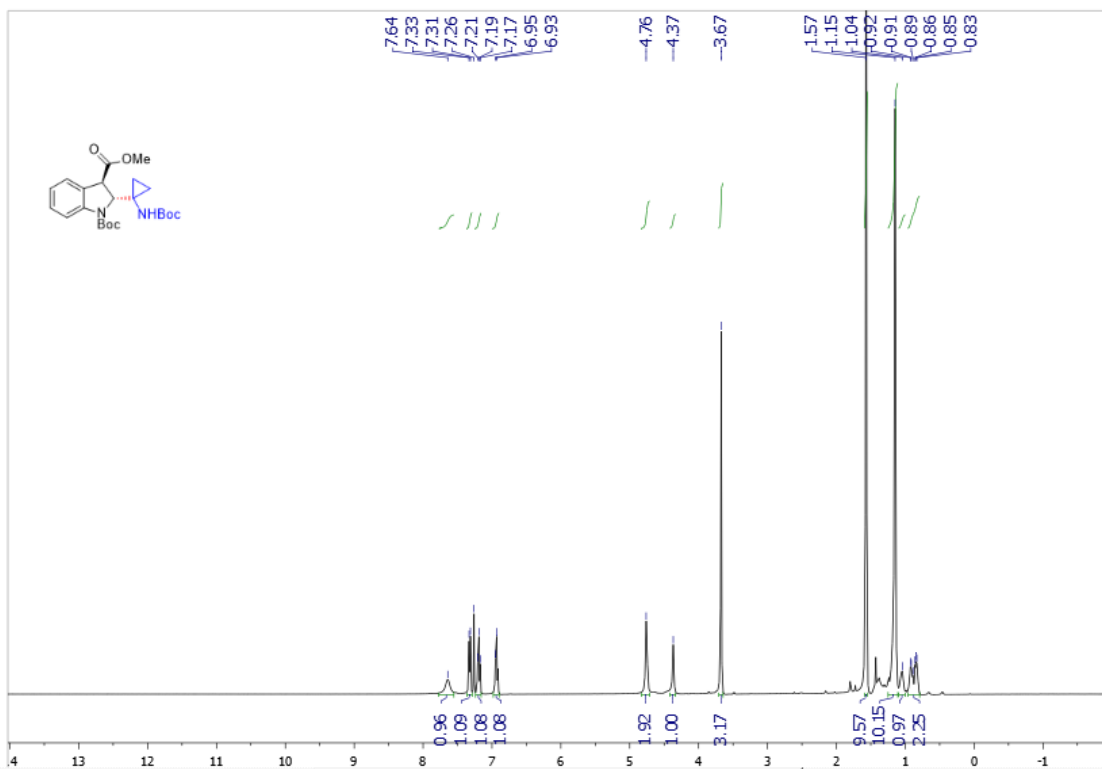

Supplementary Figure 107.  $^1\text{H}$  NMR spectra of *trans*-3ae

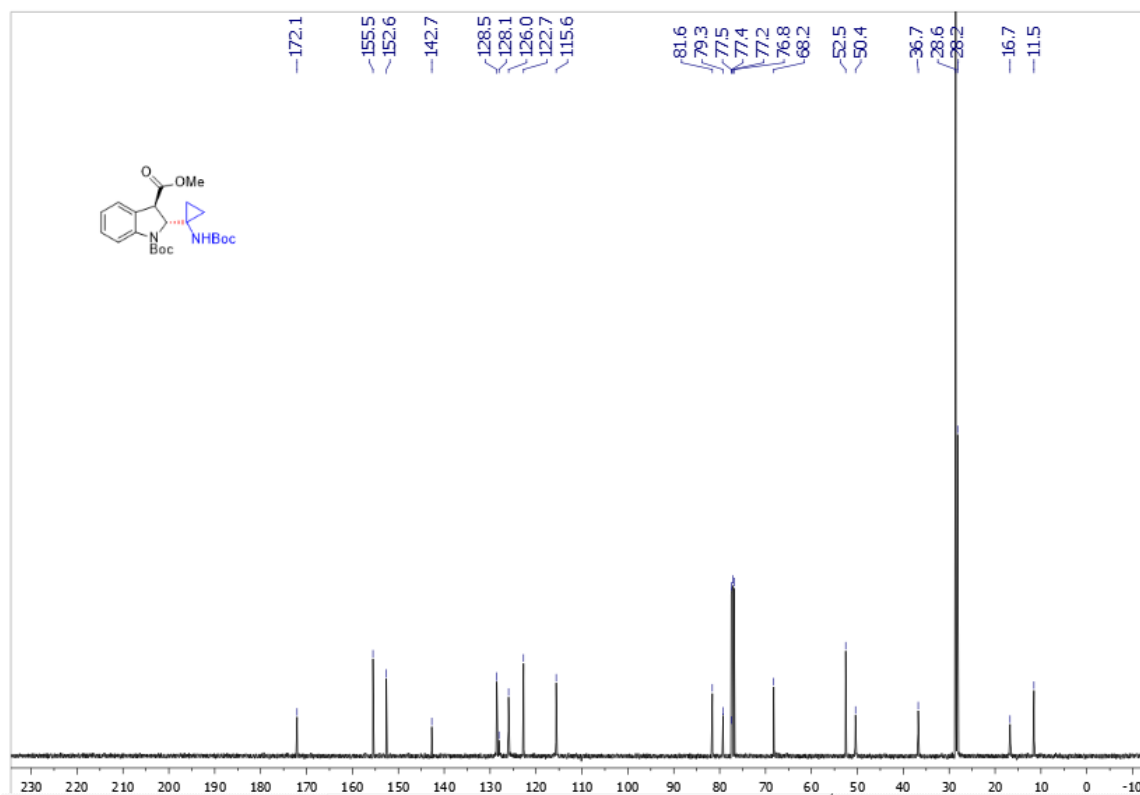

Supplementary Figure 108.  $^{13}\text{C}$  NMR spectra of *trans*-3ae

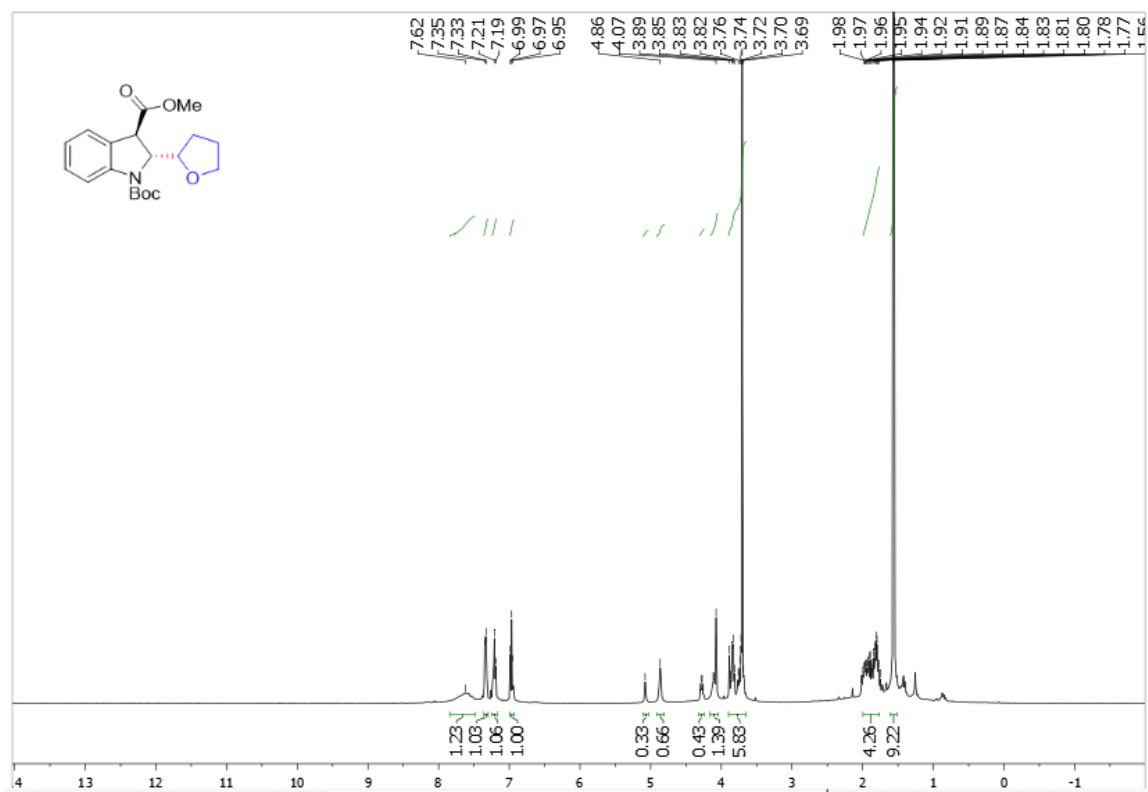

Supplementary Figure 109.  $^1\text{H}$  NMR spectra of *trans*-3af

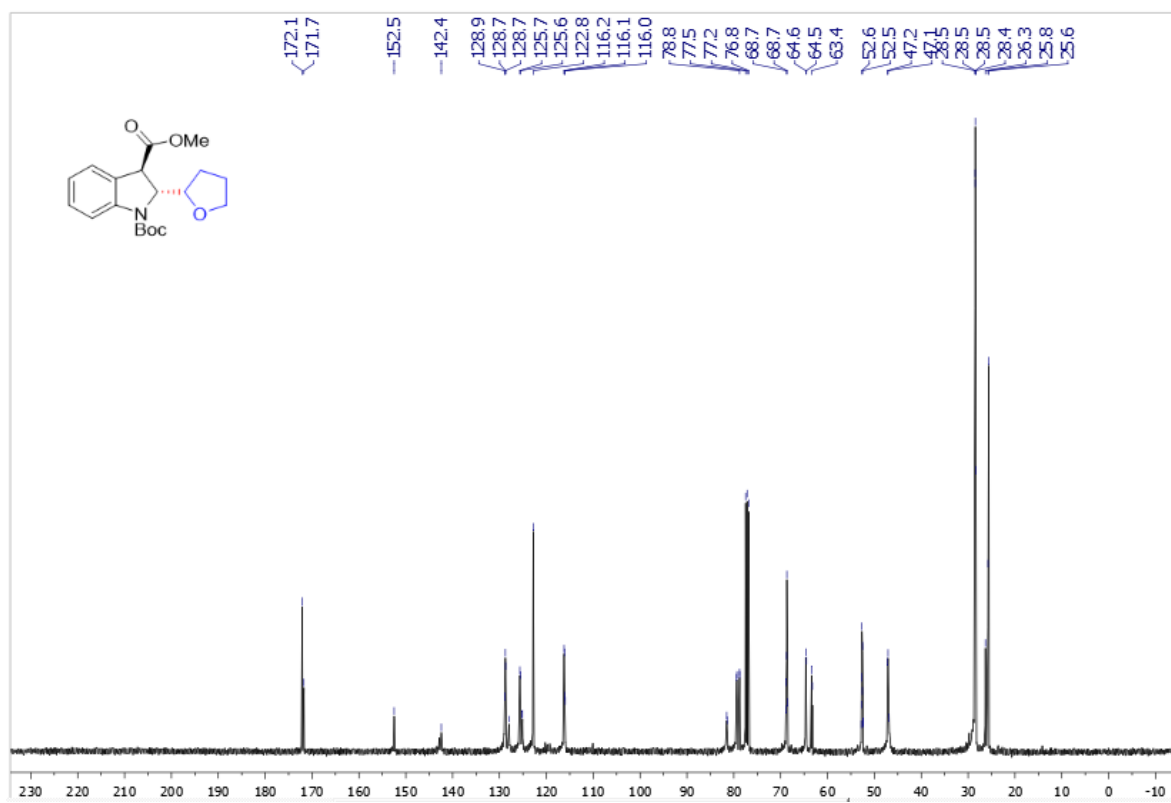

Supplementary Figure 110.  $^{13}\text{C}$  NMR spectra of *trans*-3af

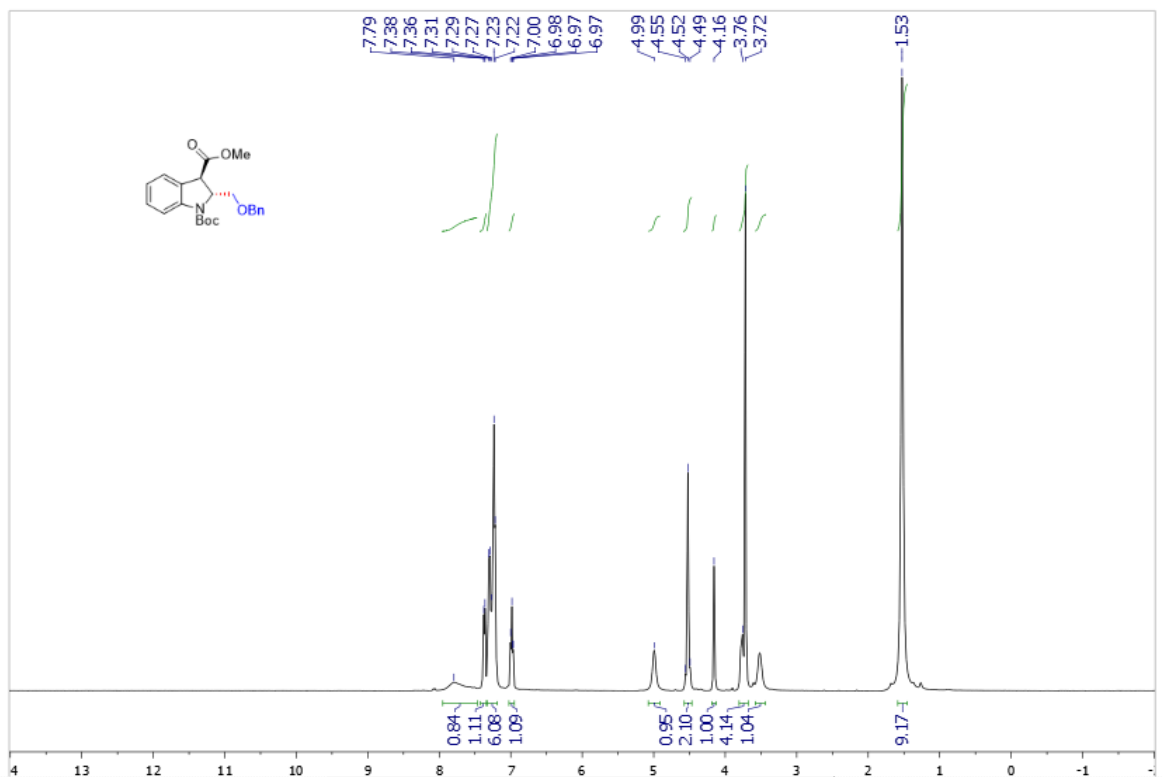

Supplementary Figure 111.  $^1\text{H}$  NMR spectra of *trans*-3ag

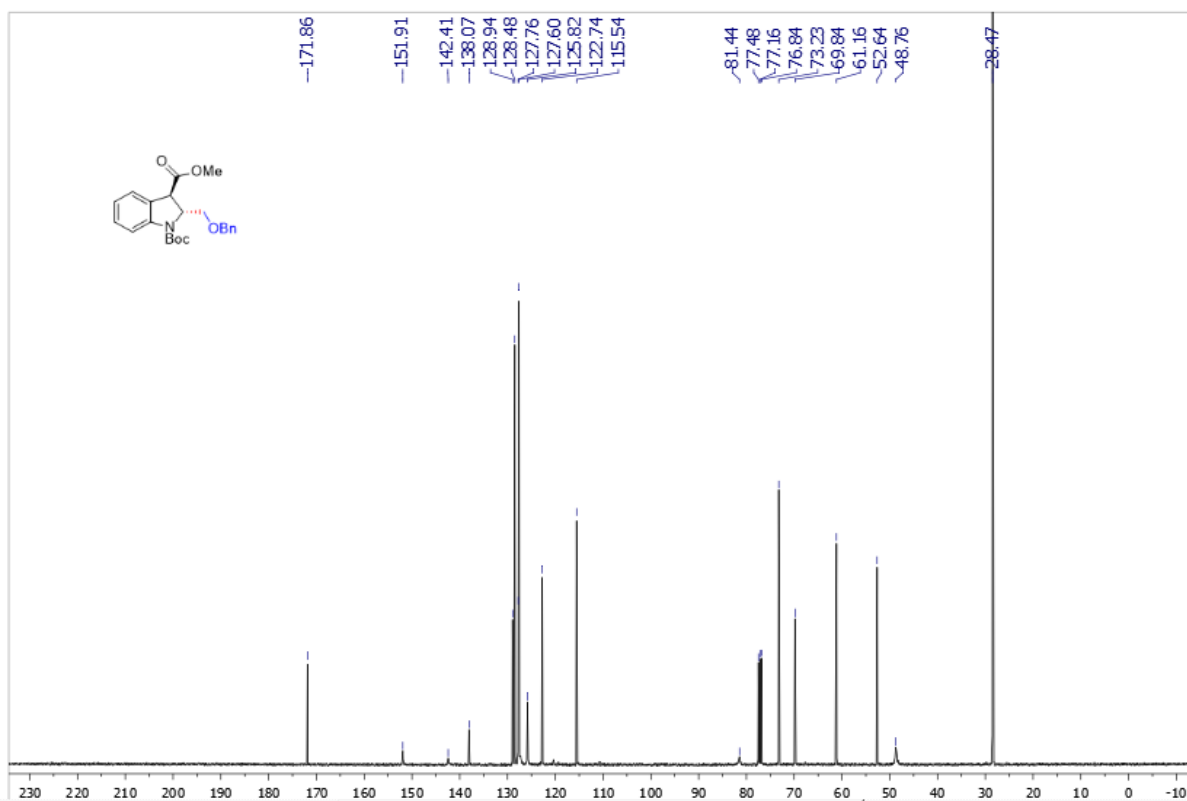

Supplementary Figure 112.  $^{13}\text{C}$  NMR spectra of *trans*-3ag



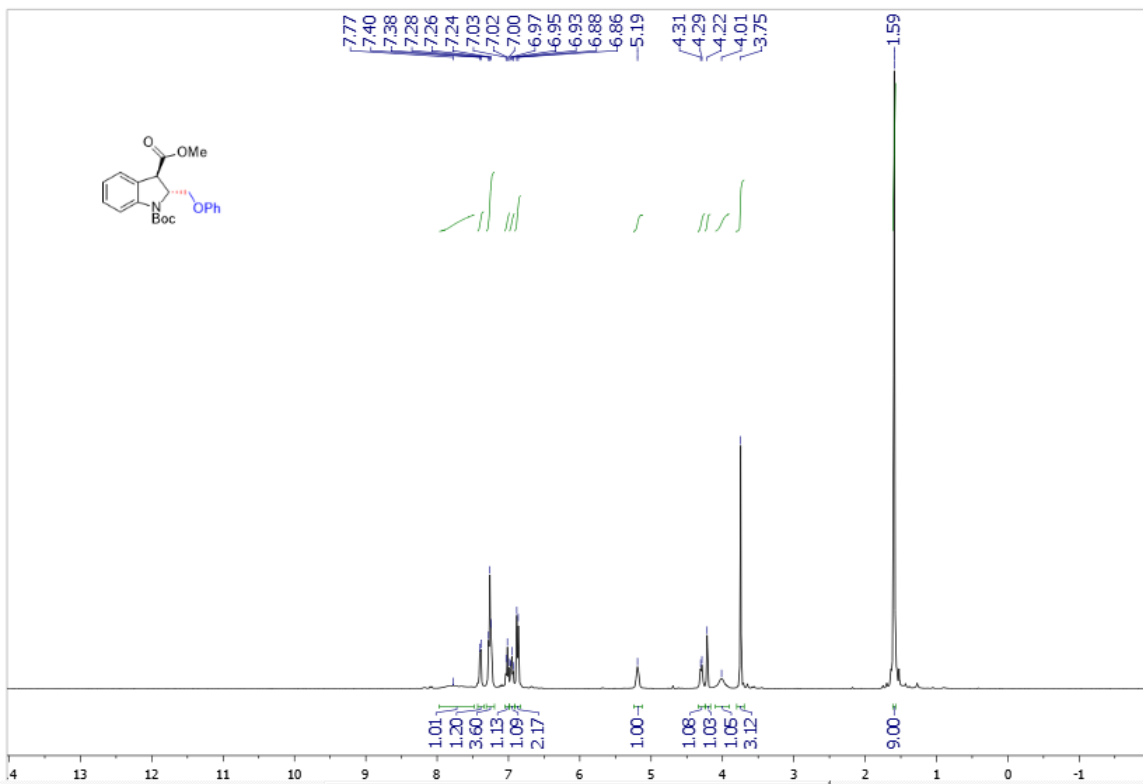

Supplementary Figure 113.  $^1\text{H}$  NMR spectra of *trans*-3ah

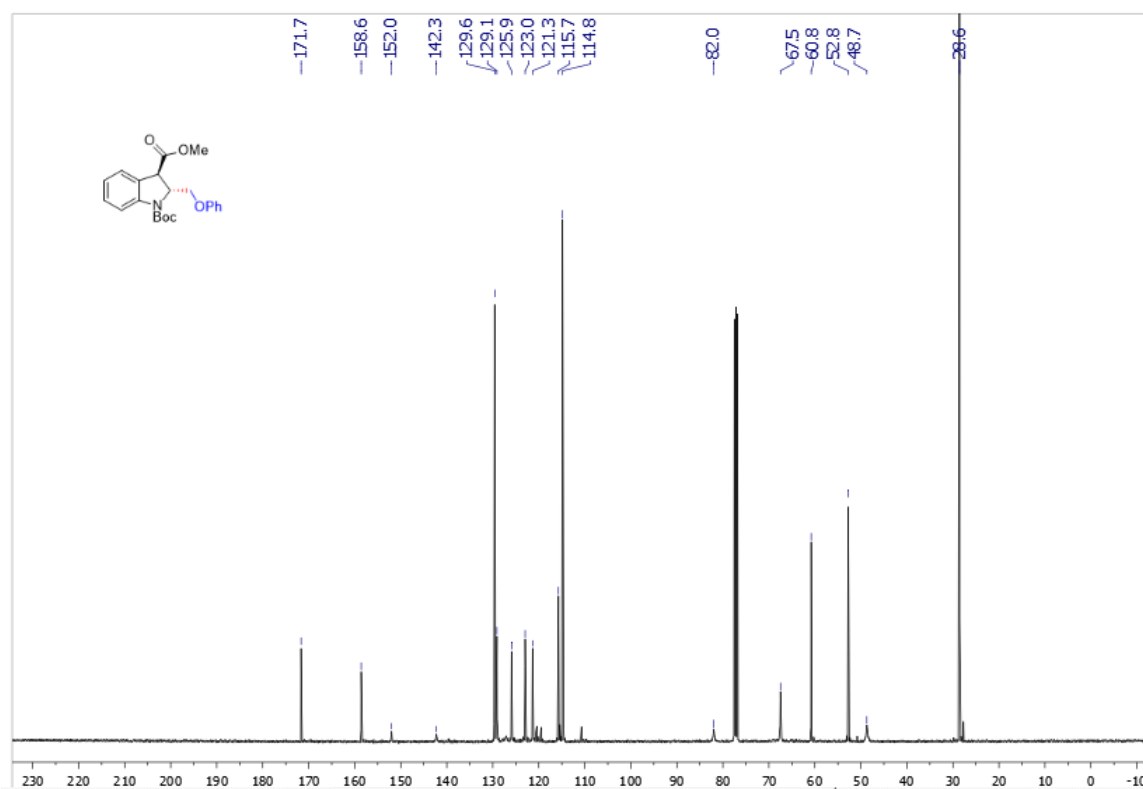

Supplementary Figure 114.  $^{13}\text{C}$  NMR spectra of *trans*-3ah

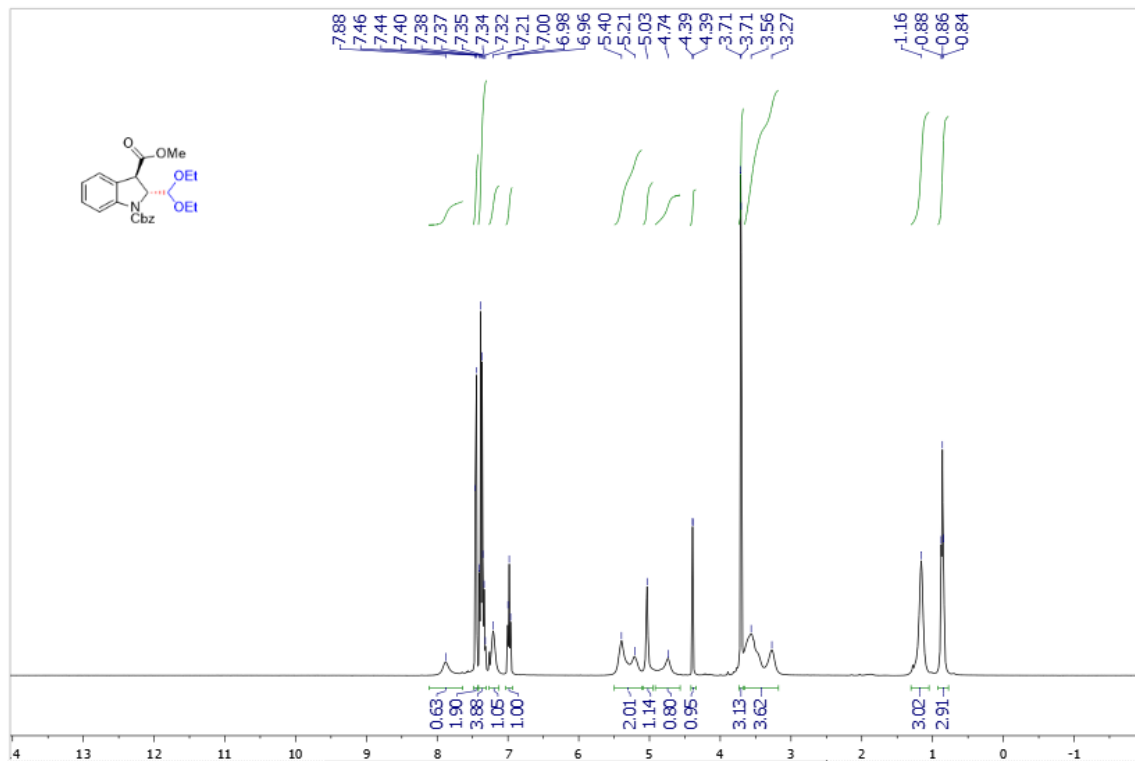

Supplementary Figure 115.  $^1\text{H}$  NMR spectra of *trans*-3ai

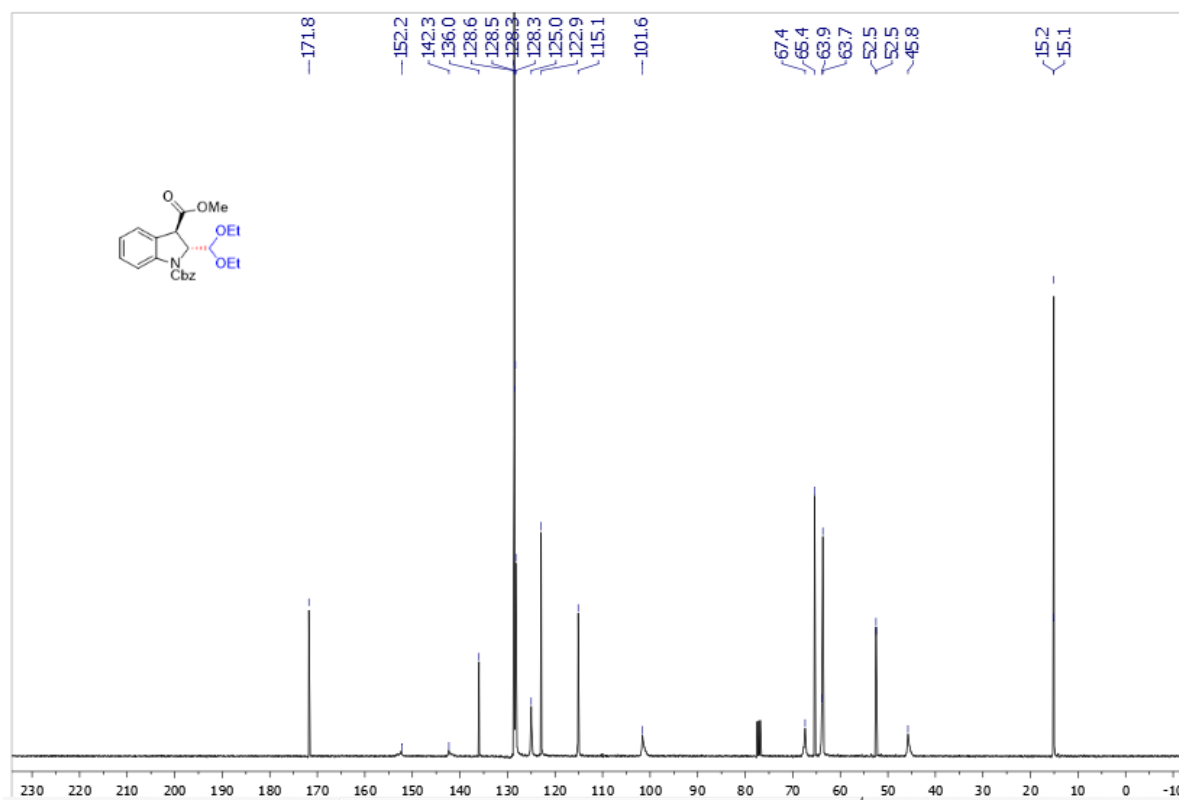

Supplementary Figure 116.  $^{13}\text{C}$  NMR spectra of *trans*-3ai

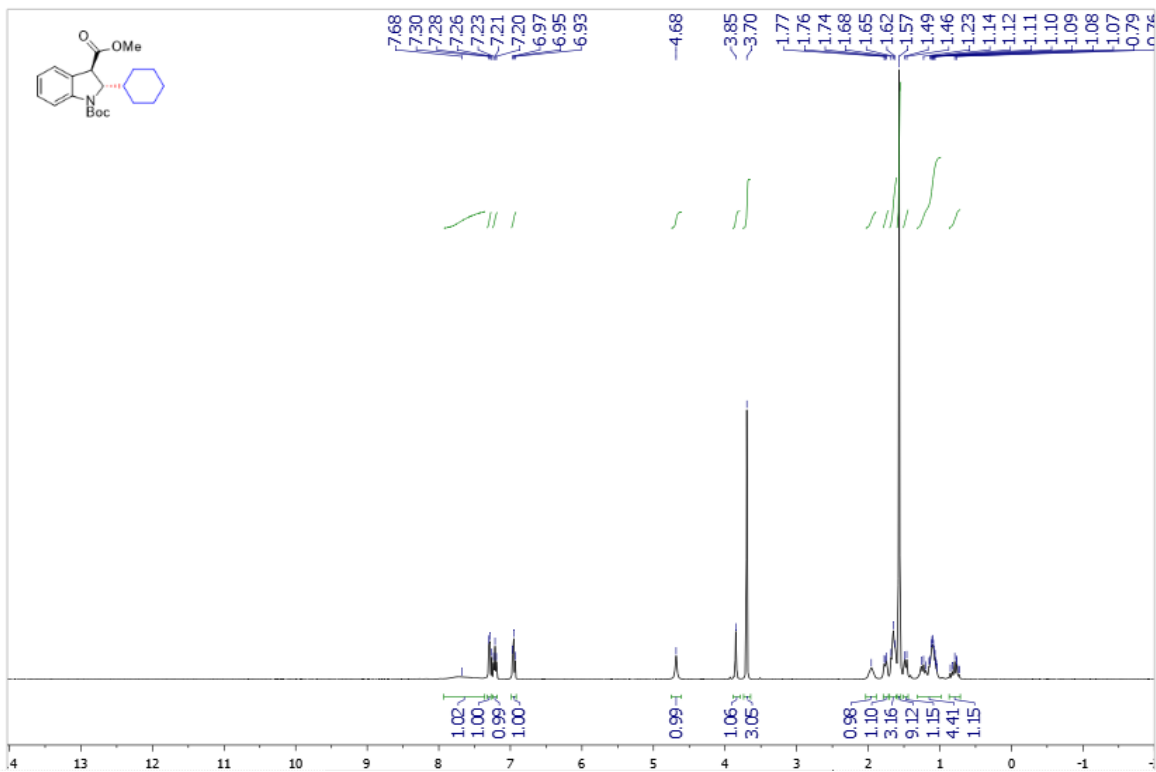

Supplementary Figure 117.  $^1\text{H}$  NMR spectra of *trans*-3aj

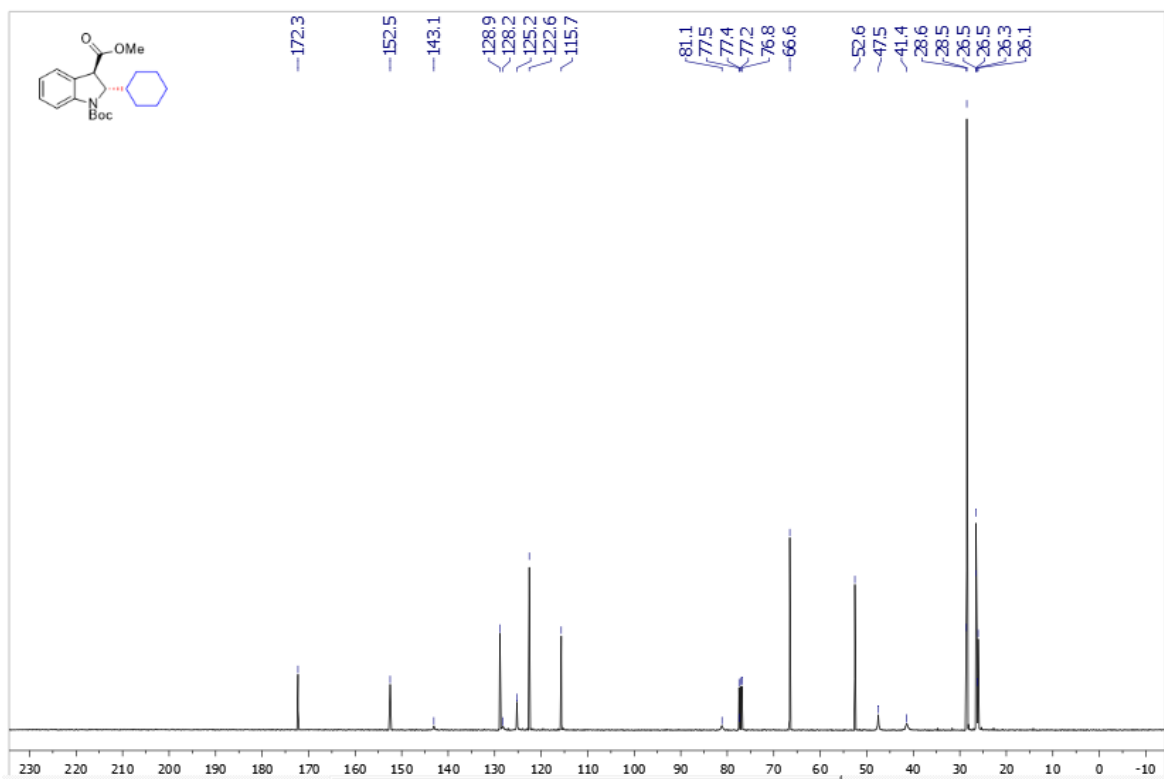

Supplementary Figure 118.  $^{13}\text{C}$  NMR spectra of *trans*-3aj

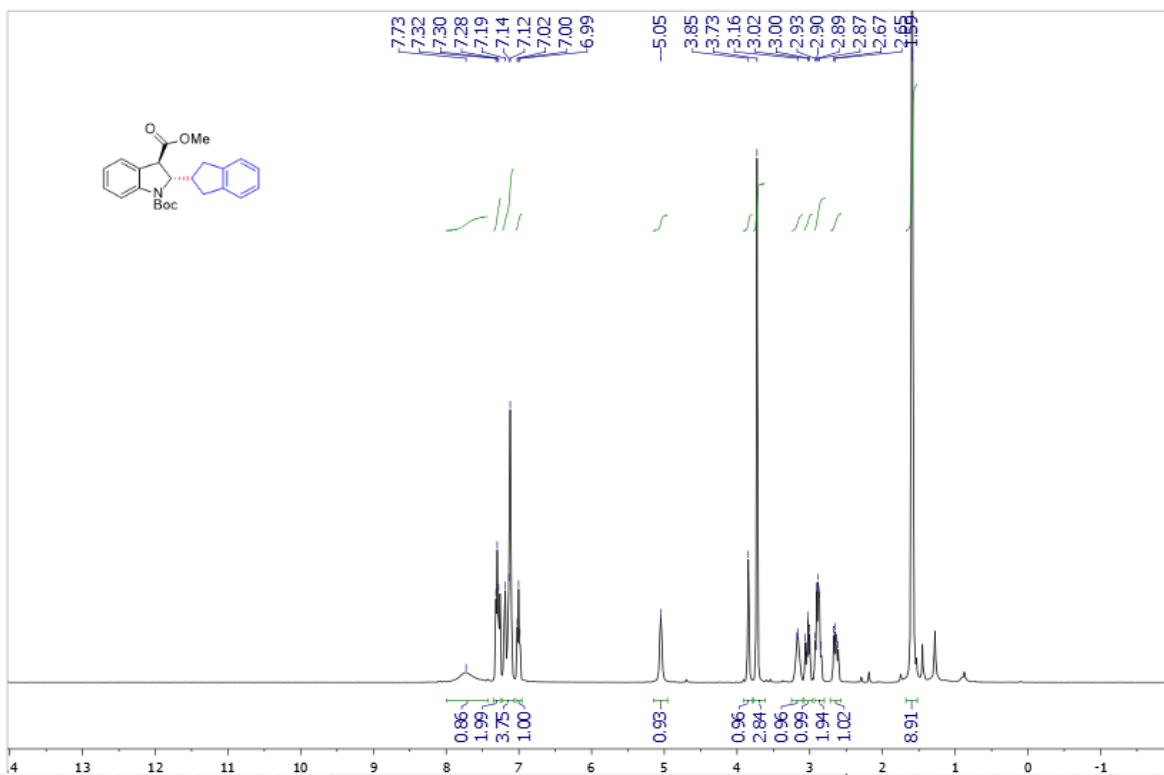

Supplementary Figure 119.  $^1\text{H}$  NMR spectra of *trans*-3ak

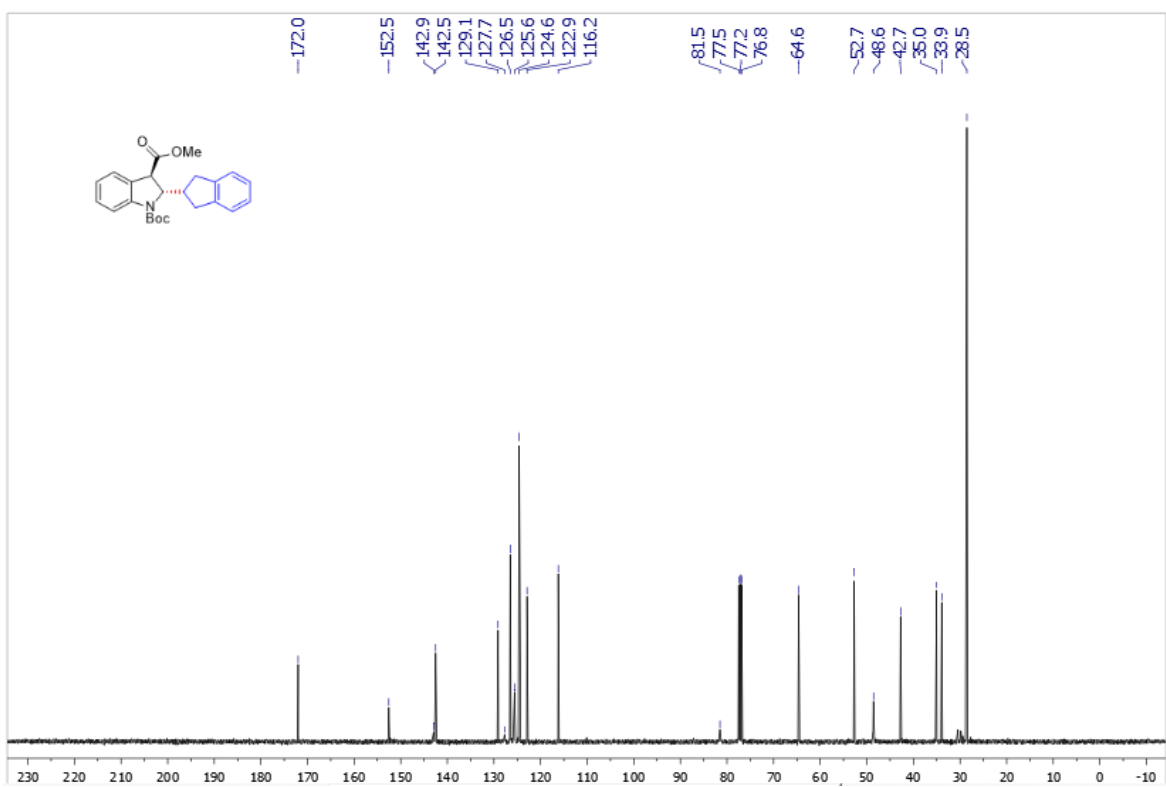

Supplementary Figure 120.  $^{13}\text{C}$  NMR spectra of *trans*-3ak

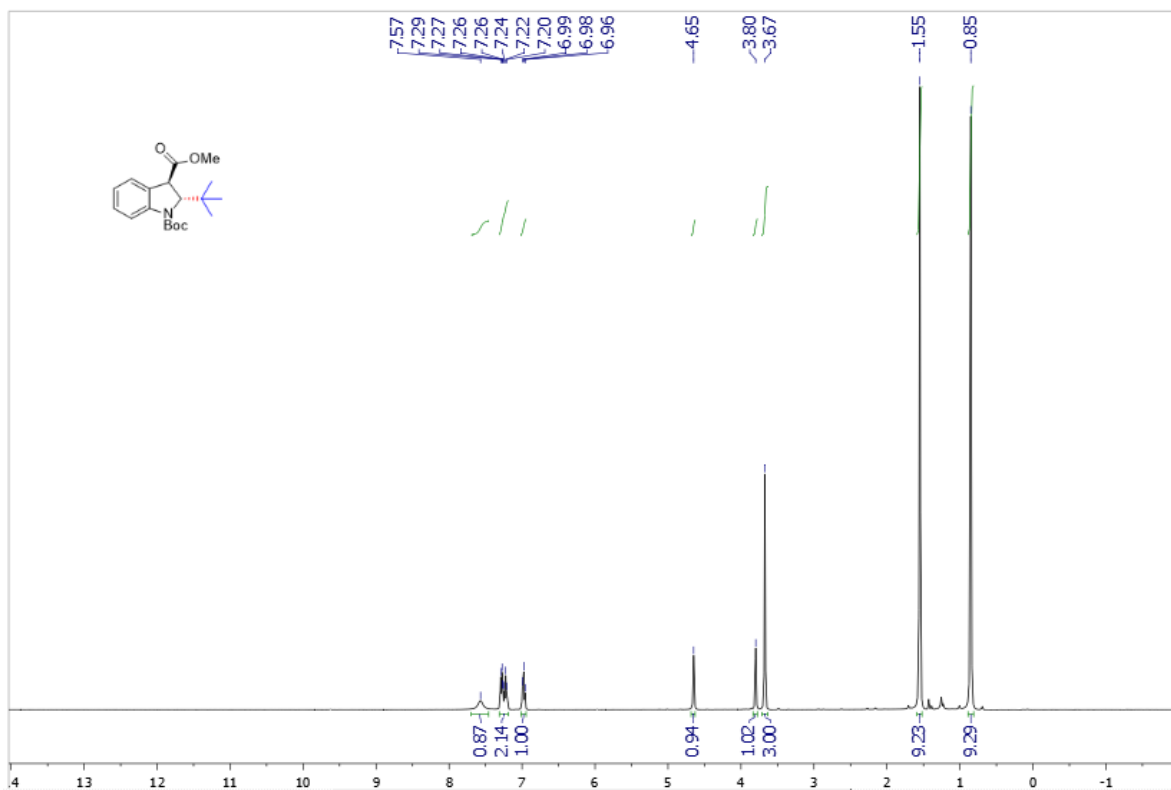

Supplementary Figure 121.  $^1\text{H}$  NMR spectra of *trans*-3al

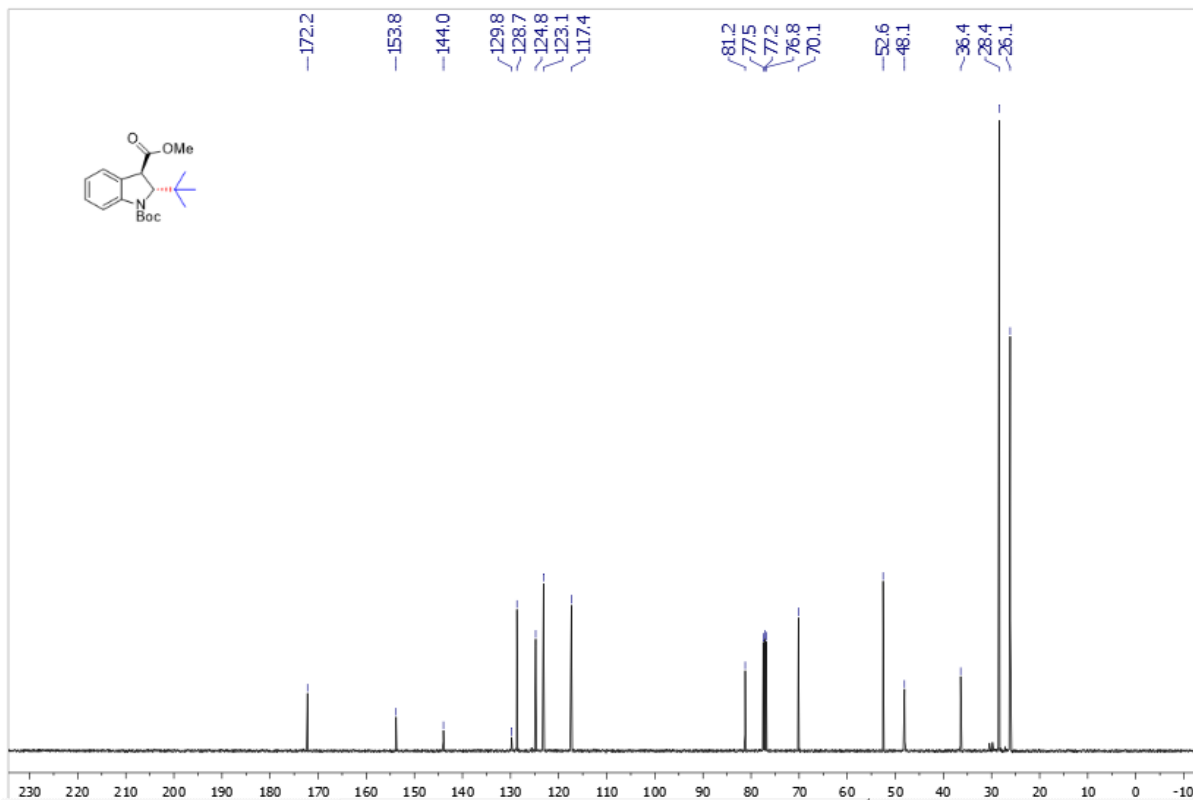

Supplementary Figure 122.  $^{13}\text{C}$  NMR spectra of *trans*-3al

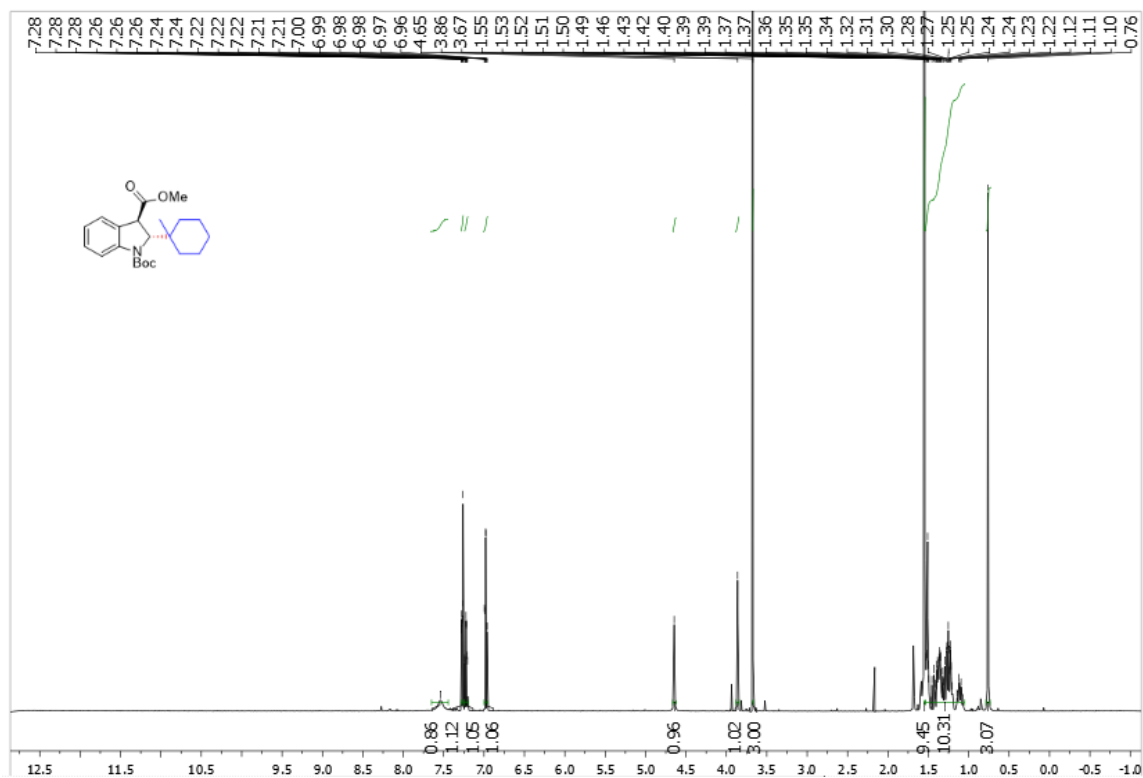

Supplementary Figure 123.  $^1\text{H}$  NMR spectra of *trans*-3am

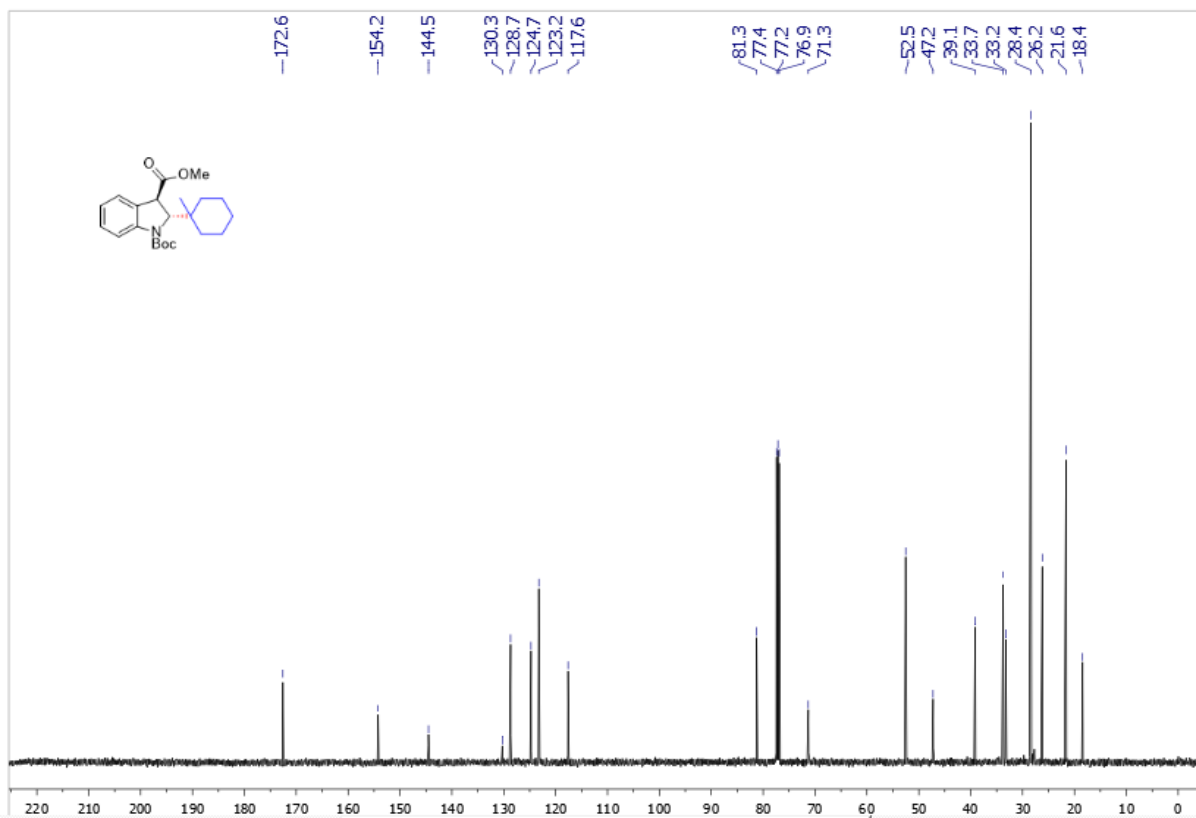

Supplementary Figure 124.  $^{13}\text{C}$  NMR spectra of *trans*-3am

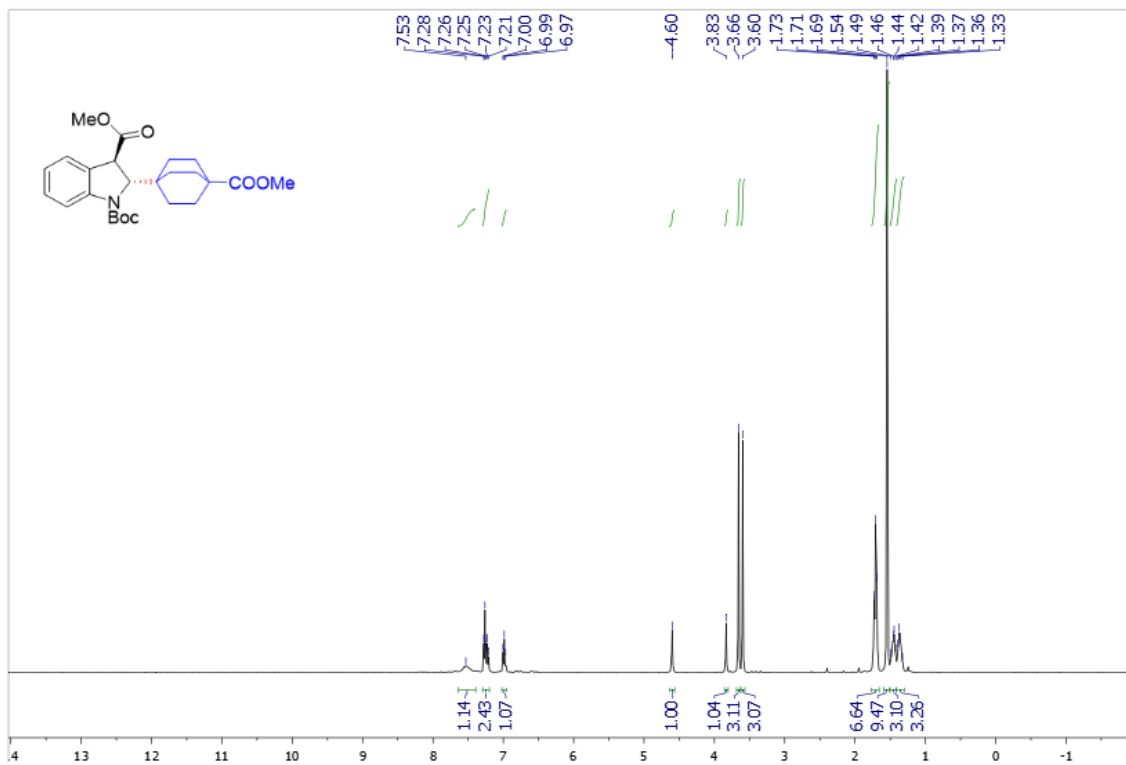

Supplementary Figure 125.  $^1\text{H}$  NMR spectra of *trans*-3an

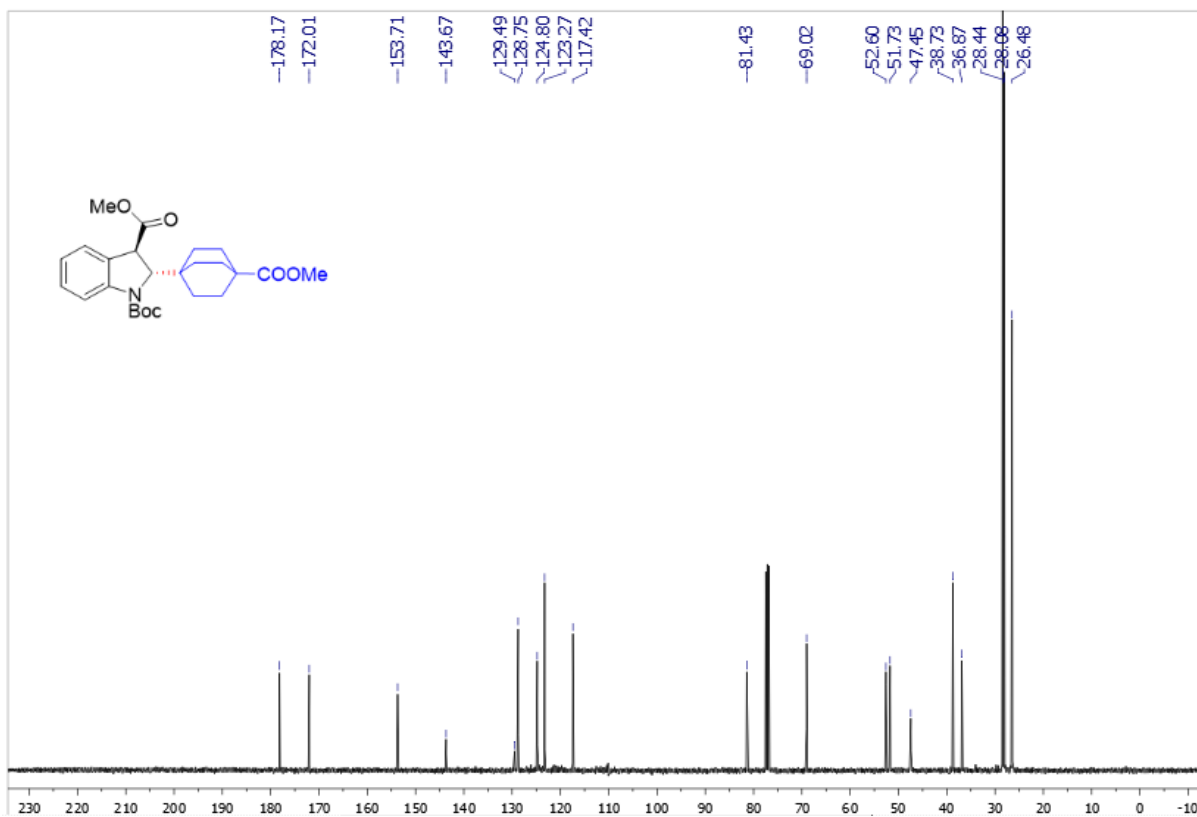

Supplementary Figure 126.  $^{13}\text{C}$  NMR spectra of *trans*-3an

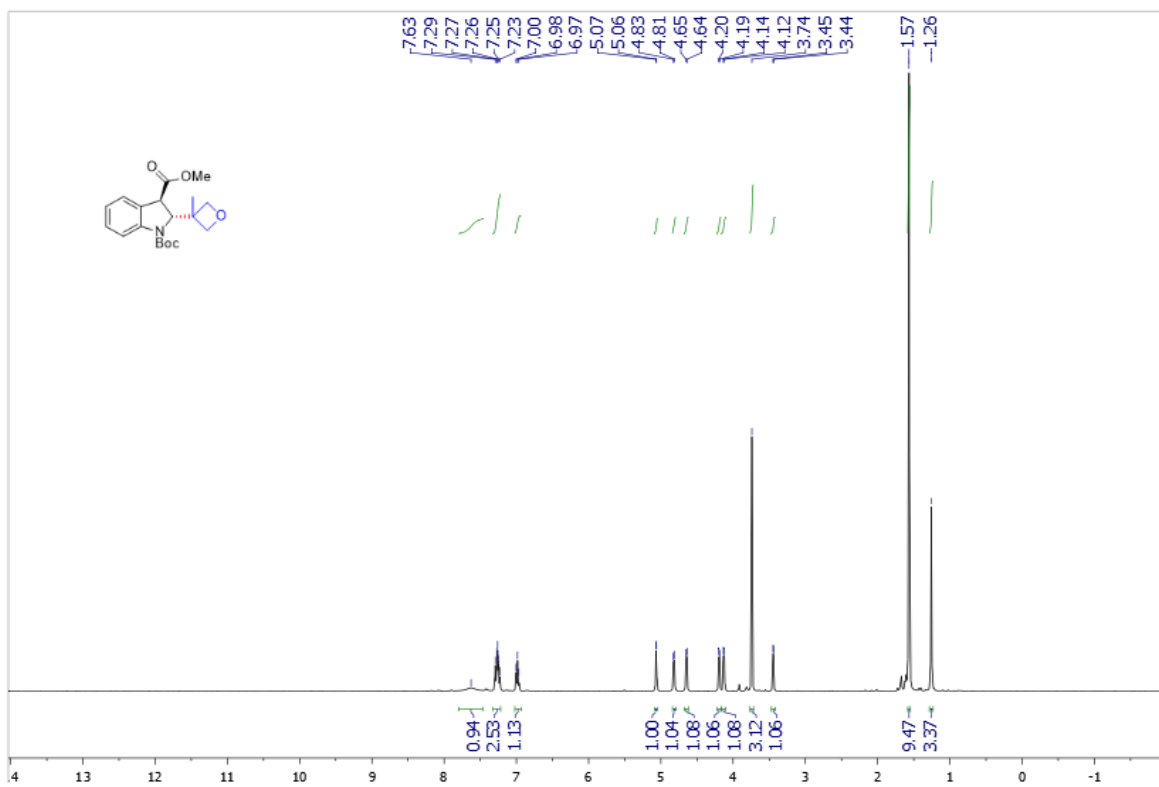

Supplementary Figure 127. <sup>1</sup>H NMR spectra of *trans*-3ao

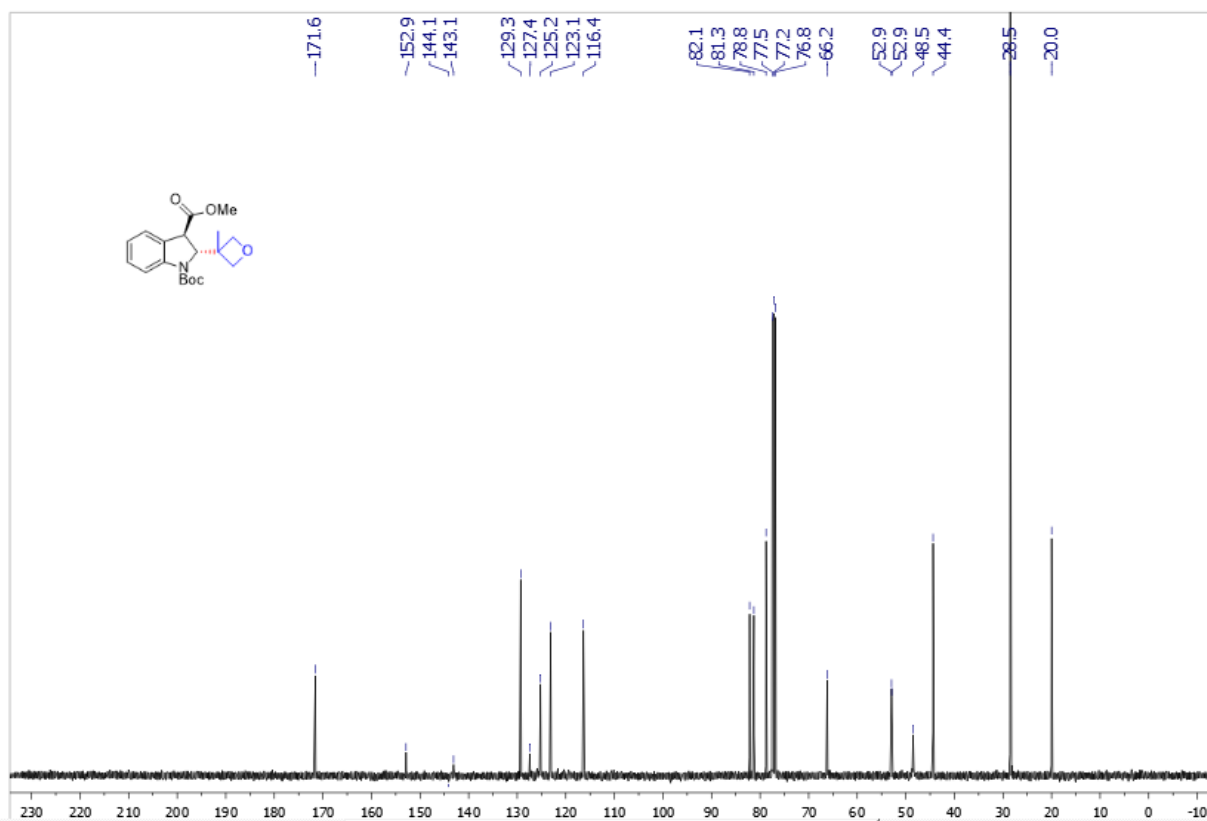

Supplementary Figure 128. <sup>13</sup>C NMR spectra of *trans*-3ao



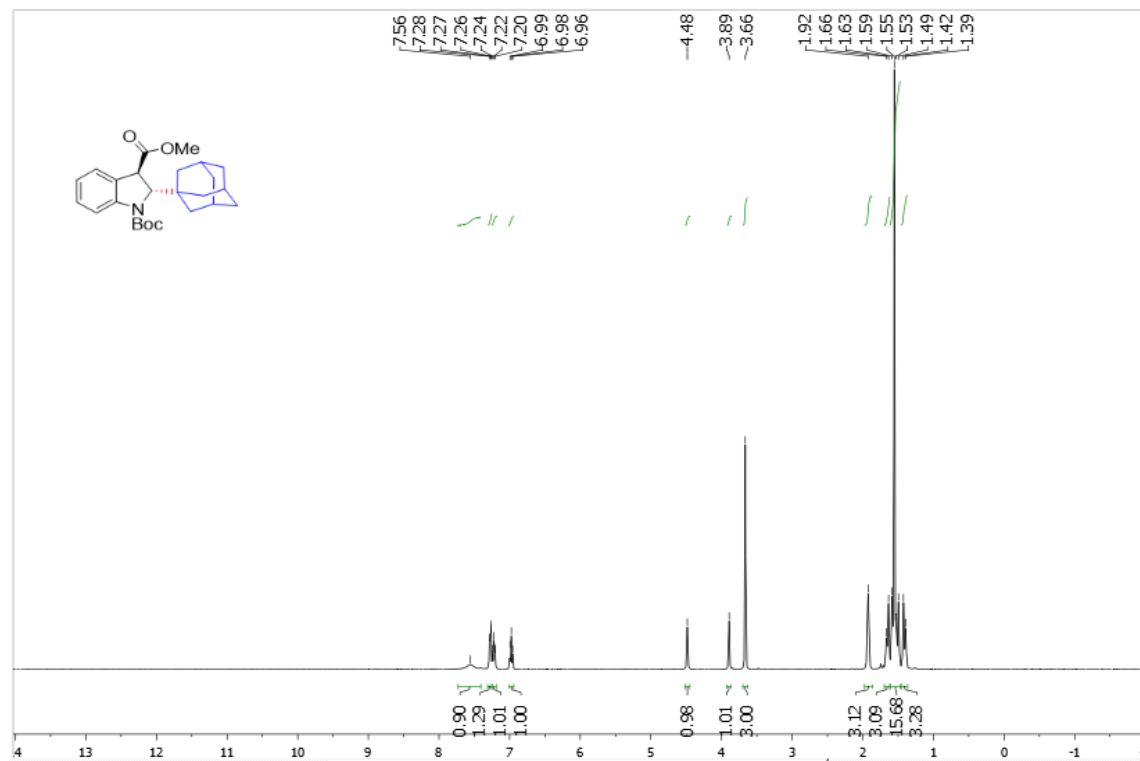

Supplementary Figure 129. <sup>1</sup>H NMR spectra of *trans*-3ap

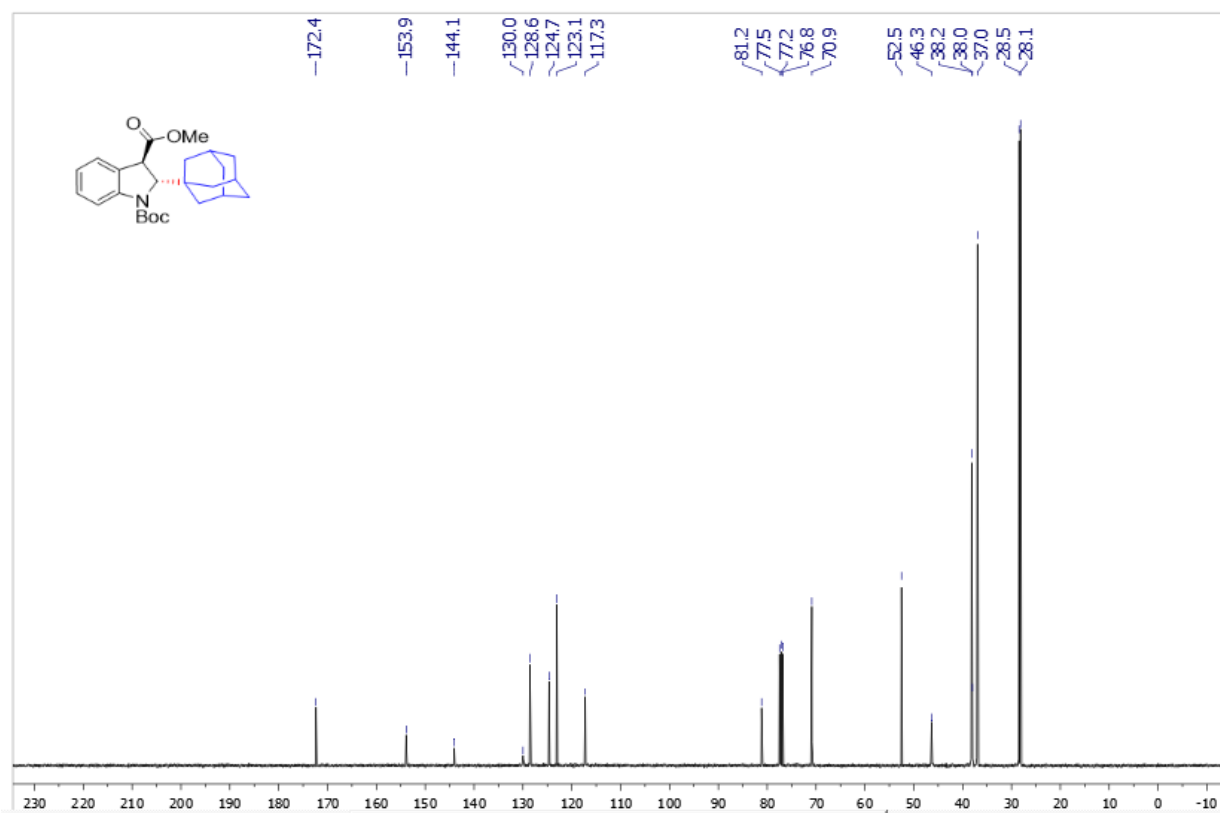

Supplementary Figure 130. <sup>13</sup>C NMR spectra of *trans*-3ap

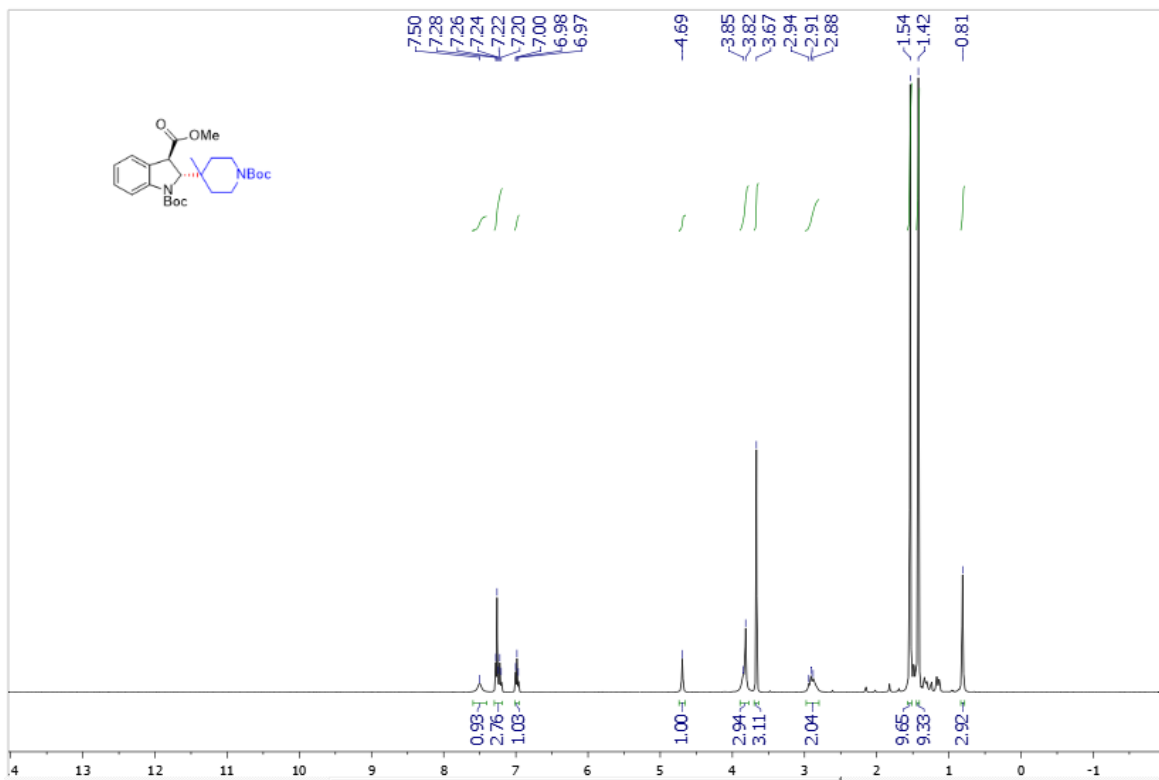

Supplementary Figure 131.  $^1\text{H}$  NMR spectra of *trans*-3aq

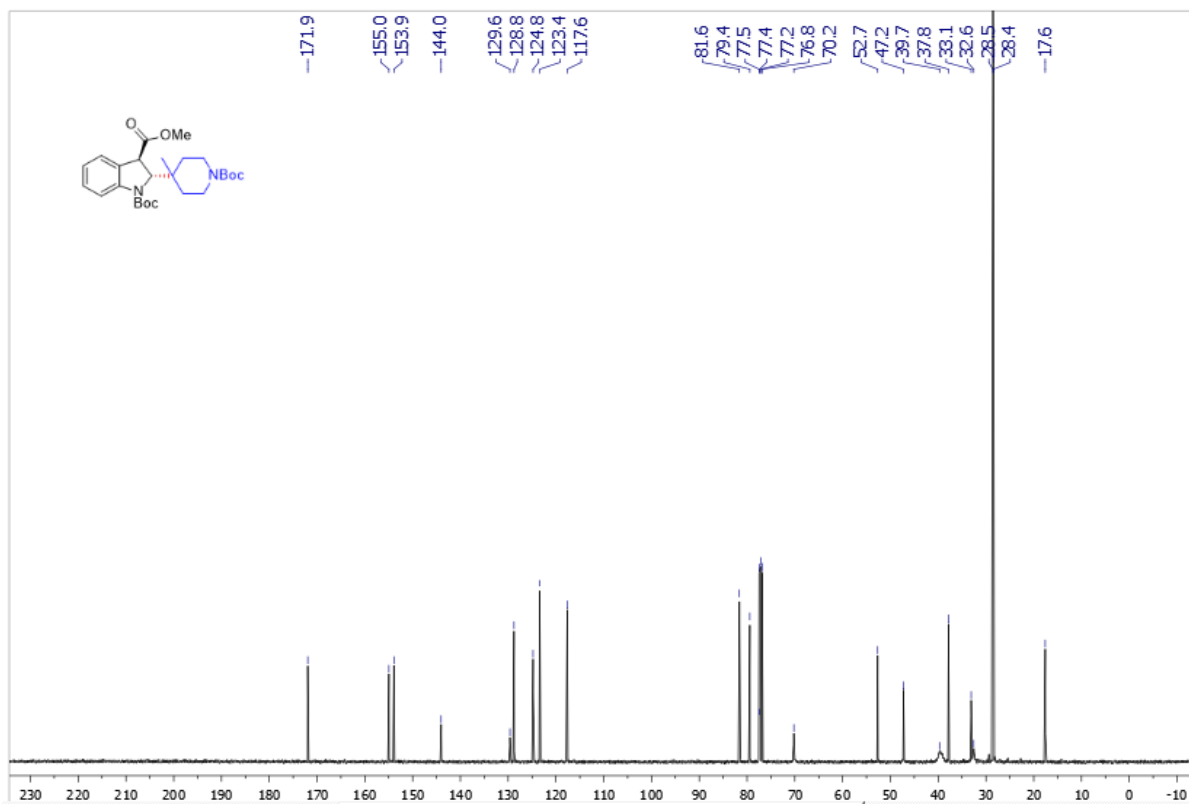

Supplementary Figure 132.  $^{13}\text{C}$  NMR spectra of *trans*-3aq

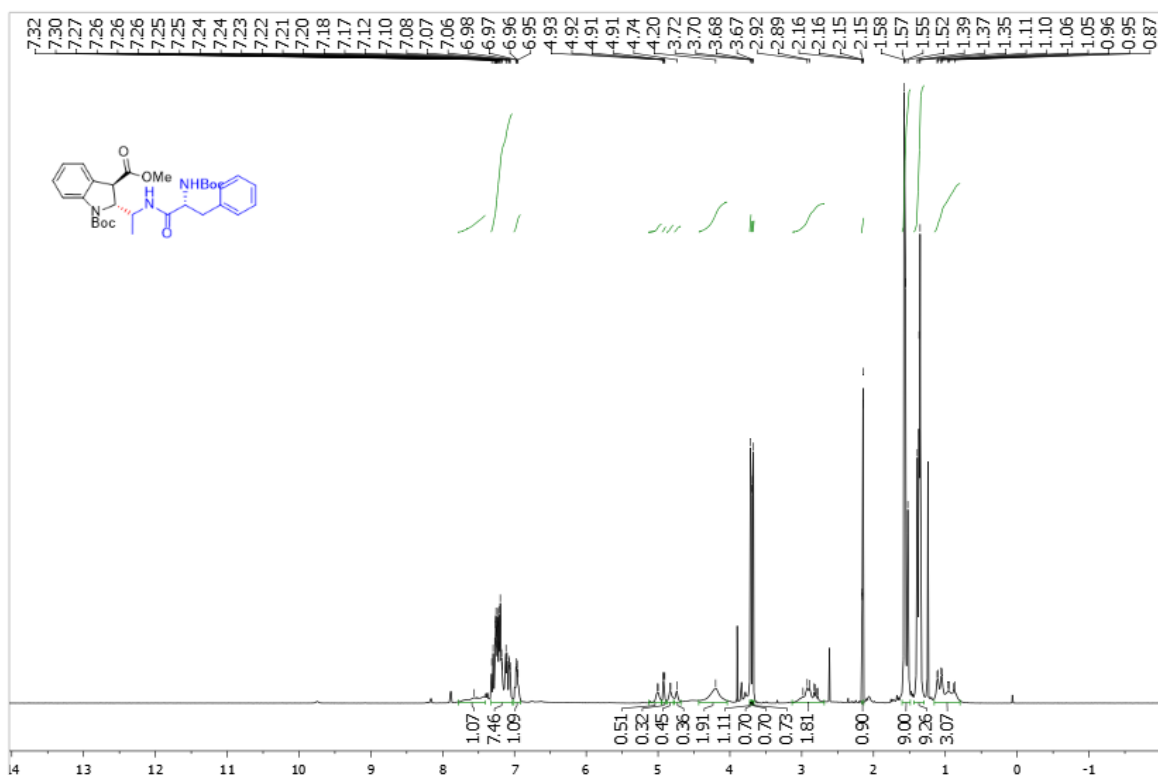

Supplementary Figure 133.  $^1\text{H}$  NMR spectra of *trans*-3ar

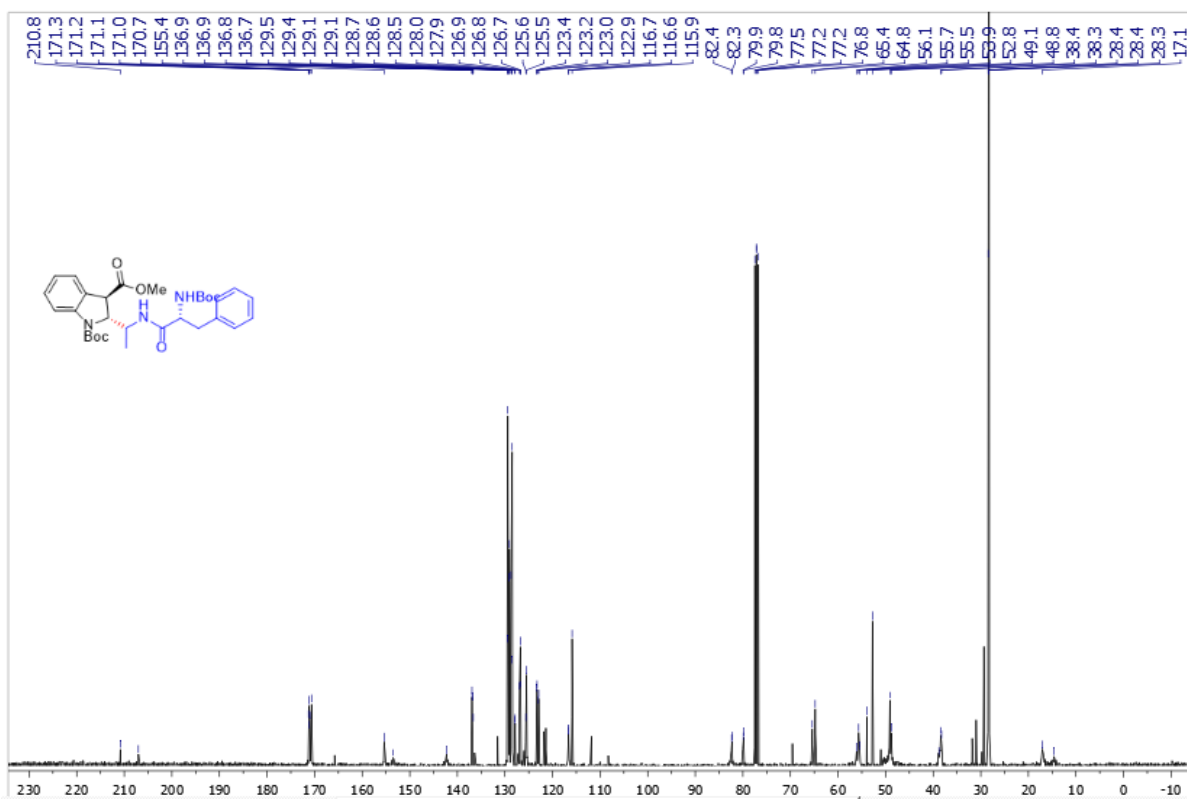

Supplementary Figure 134.  $^{13}\text{C}$  NMR spectra of *trans*-3ar

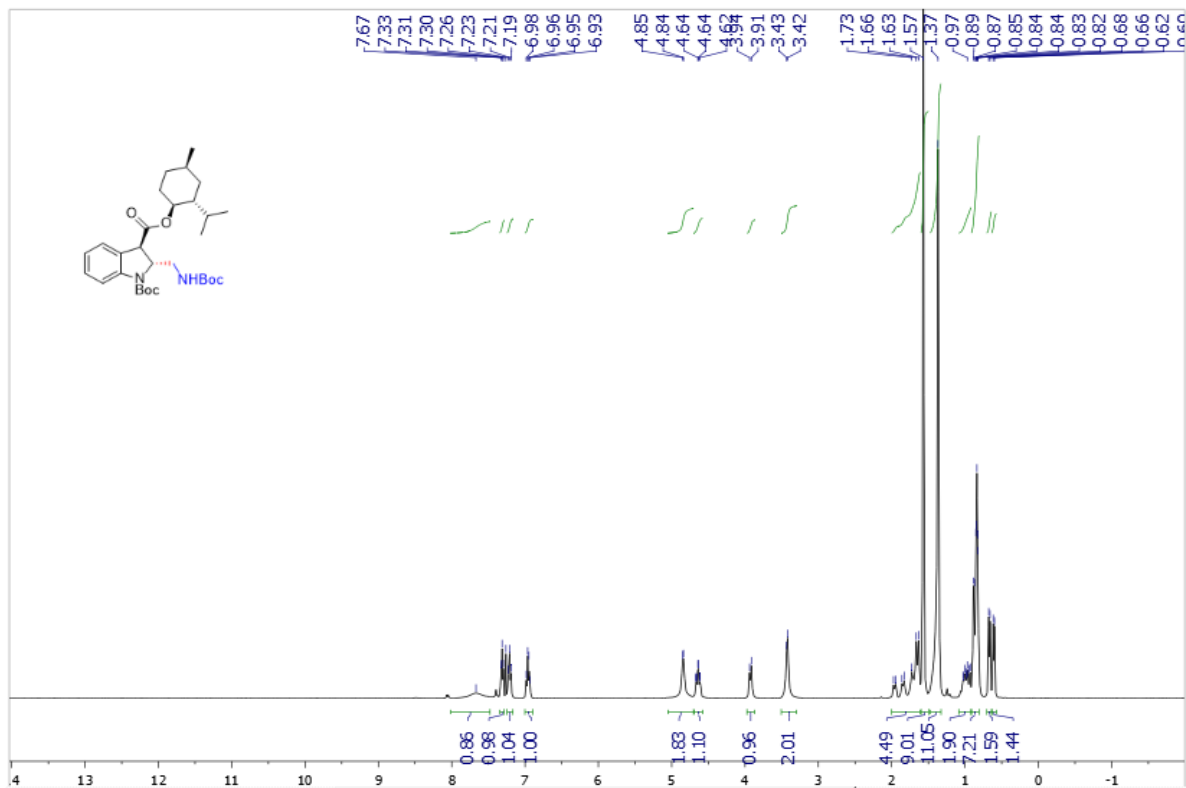

Supplementary Figure 135.  $^1\text{H}$  NMR spectra of *trans*-3as

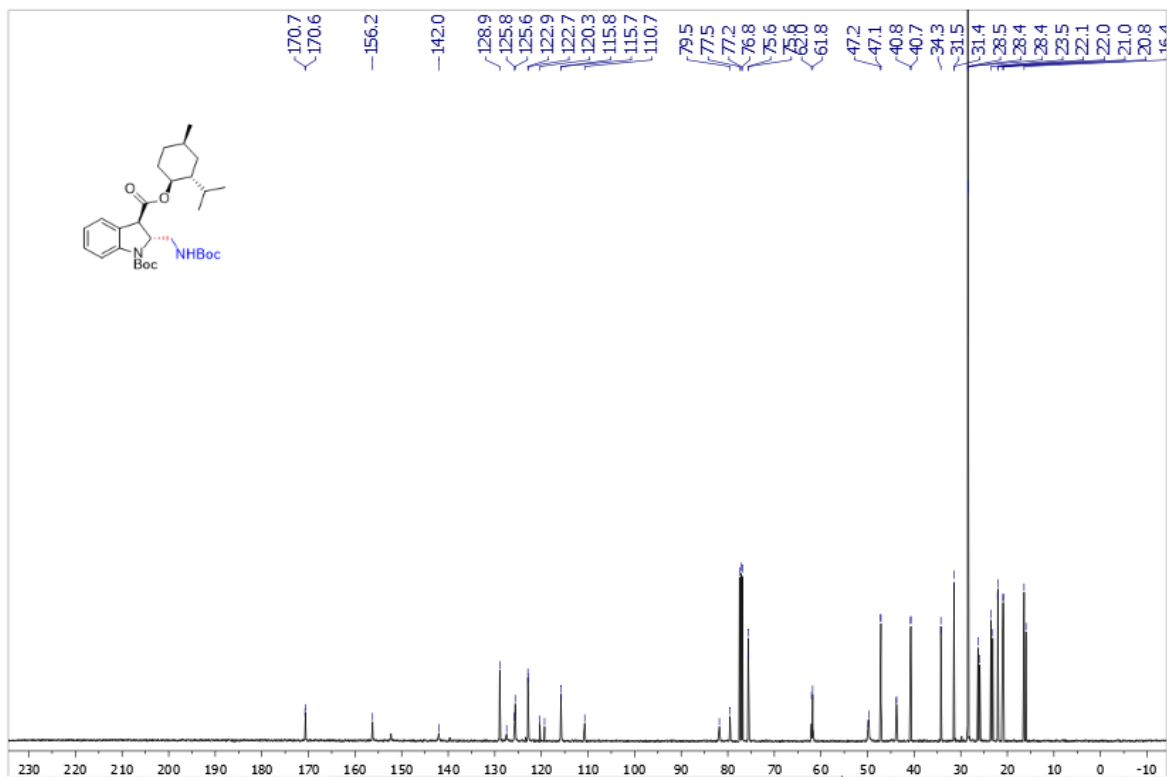

Supplementary Figure 136.  $^{13}\text{C}$  NMR spectra of *trans*-3as

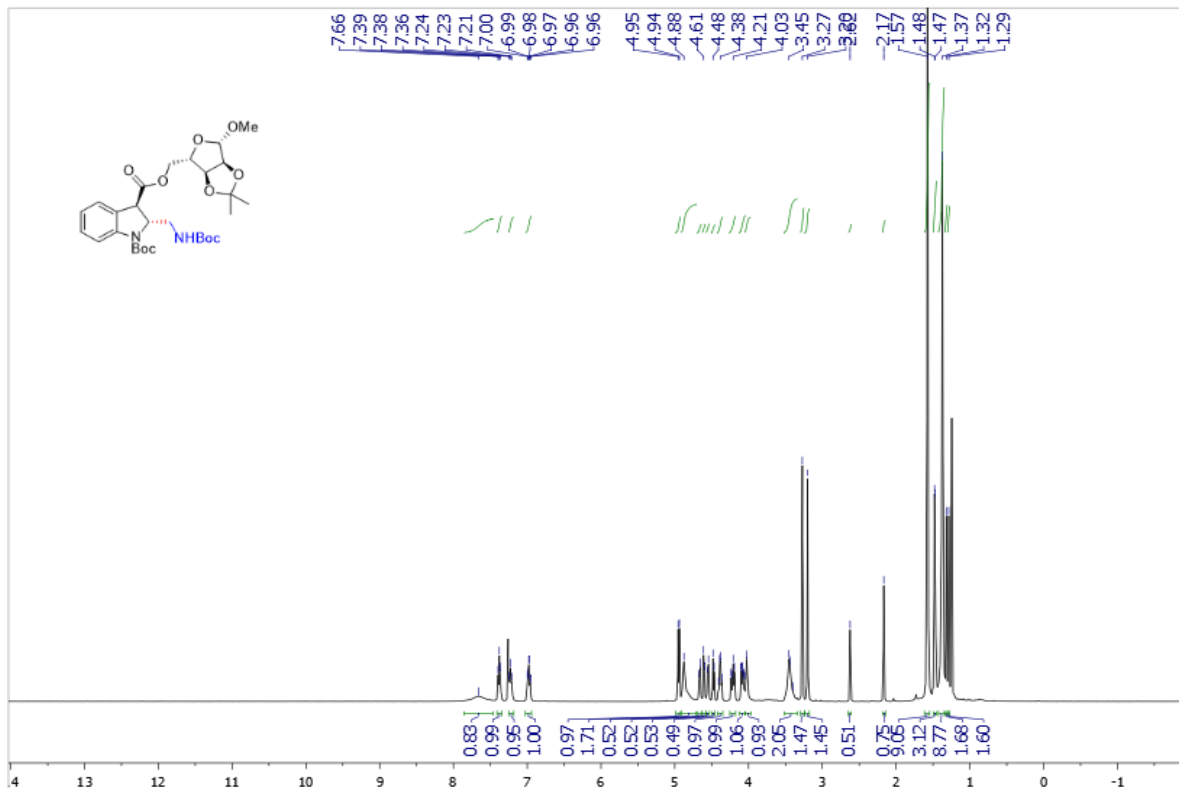

Supplementary Figure 137. <sup>1</sup>H NMR spectra of *trans*-3at

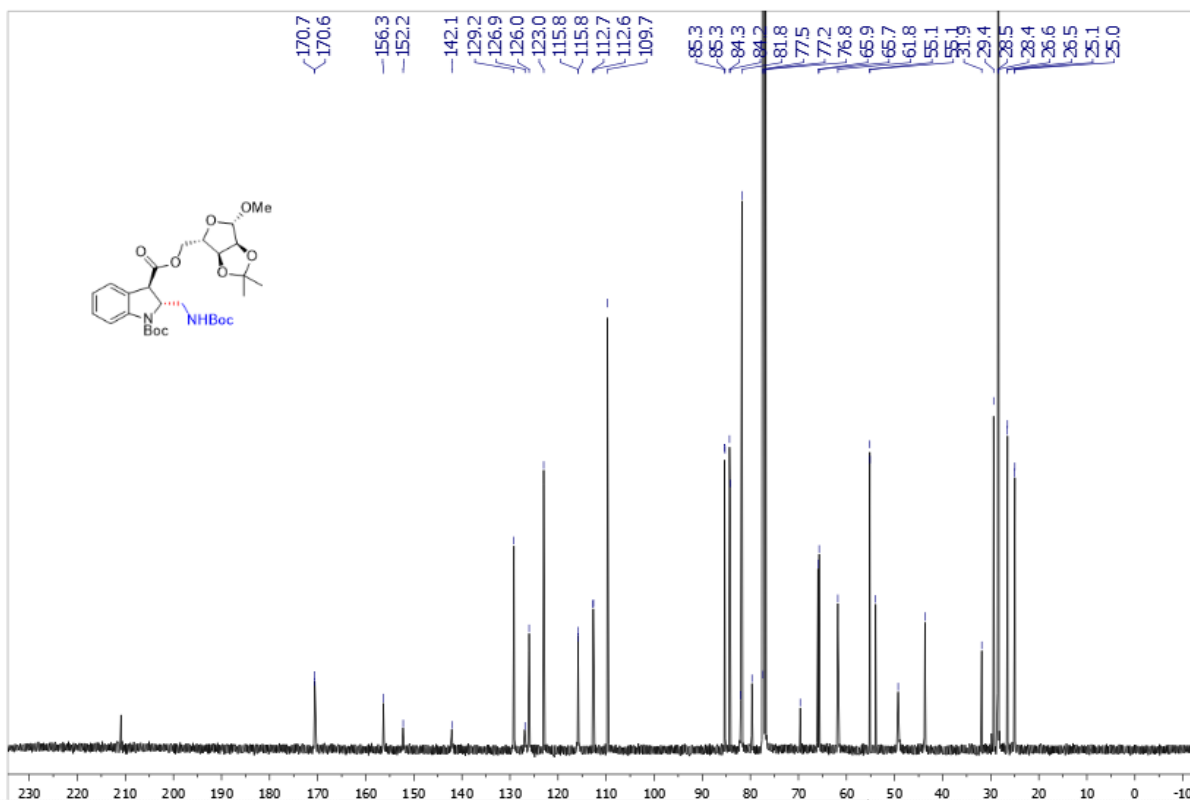

Supplementary Figure 138. <sup>13</sup>C NMR spectra of *trans*-3at

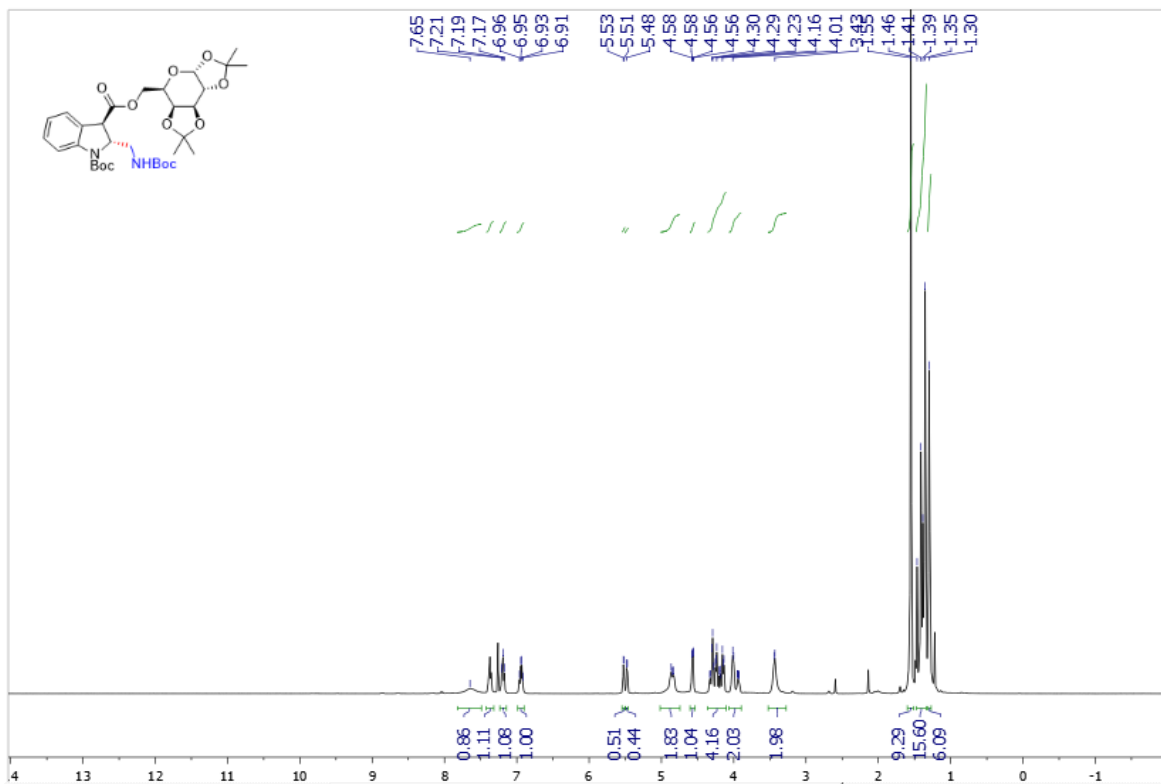

Supplementary Figure 139. <sup>1</sup>H NMR spectra of *trans*-3au

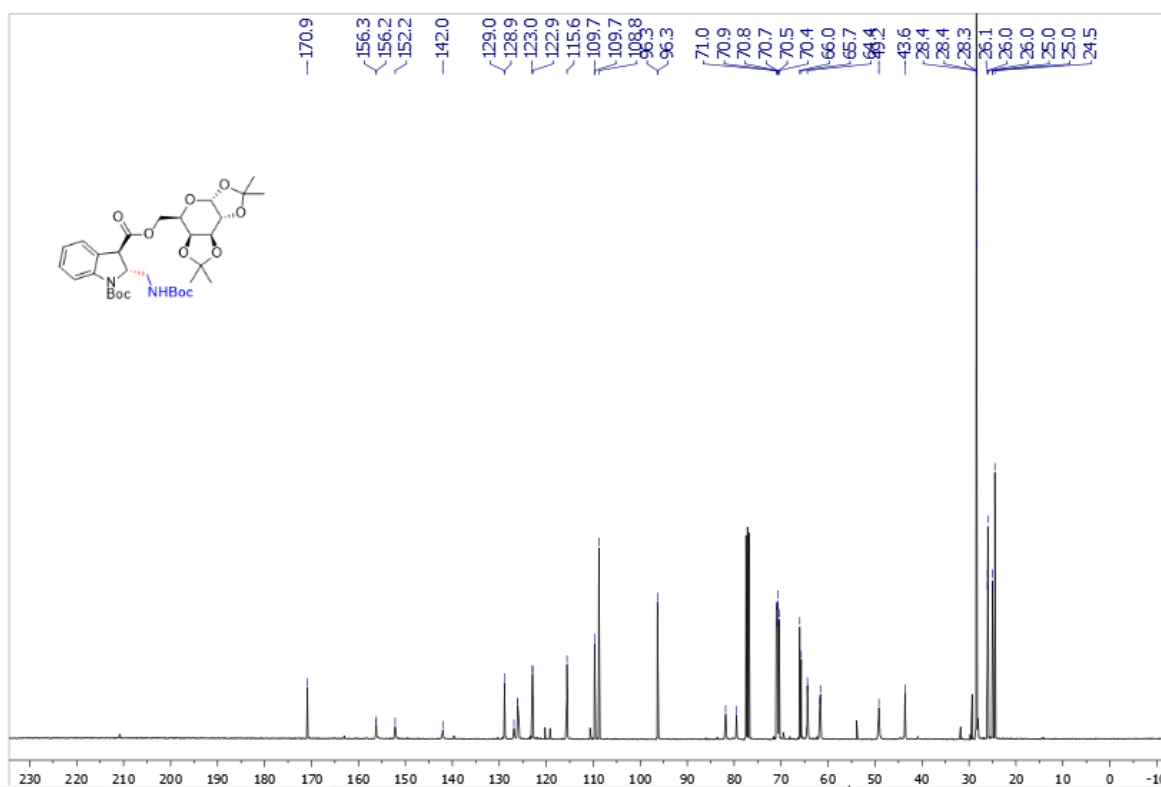

Supplementary Figure 140. <sup>13</sup>C NMR spectra of *trans*-3au

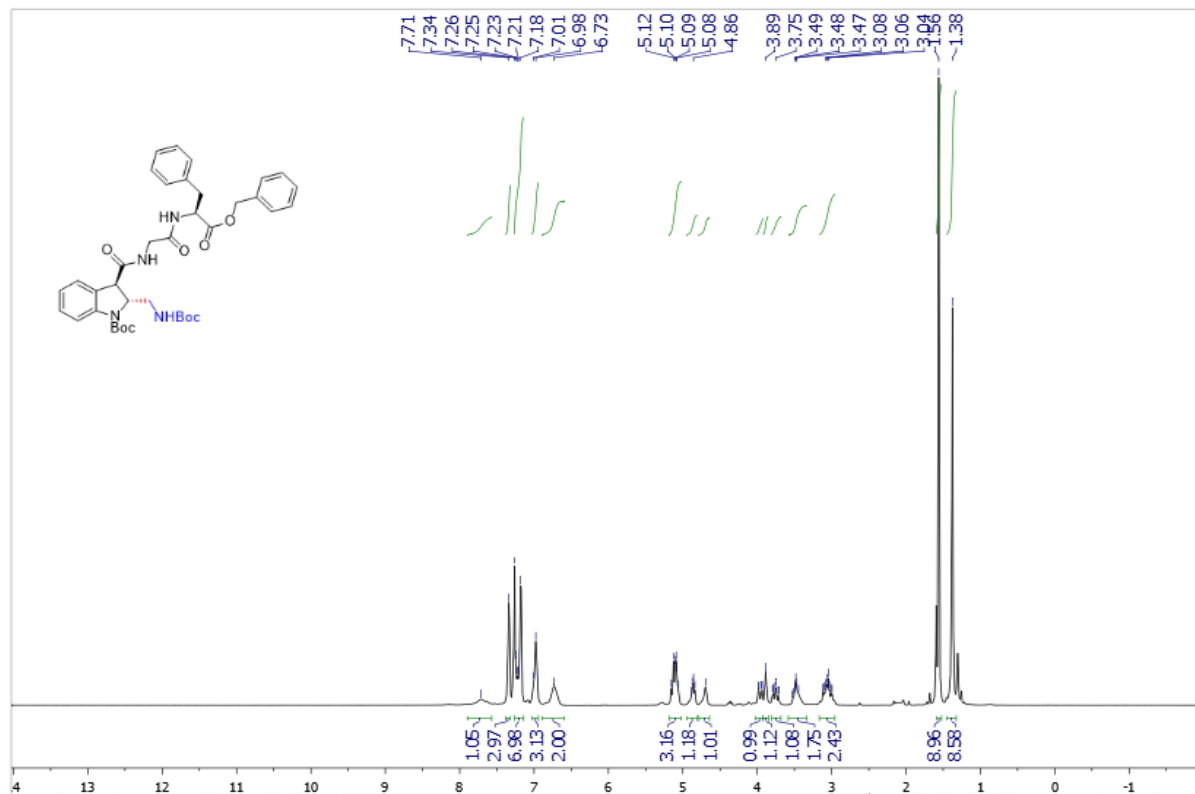

Supplementary Figure 141. <sup>1</sup>H NMR spectra of *trans*-3av

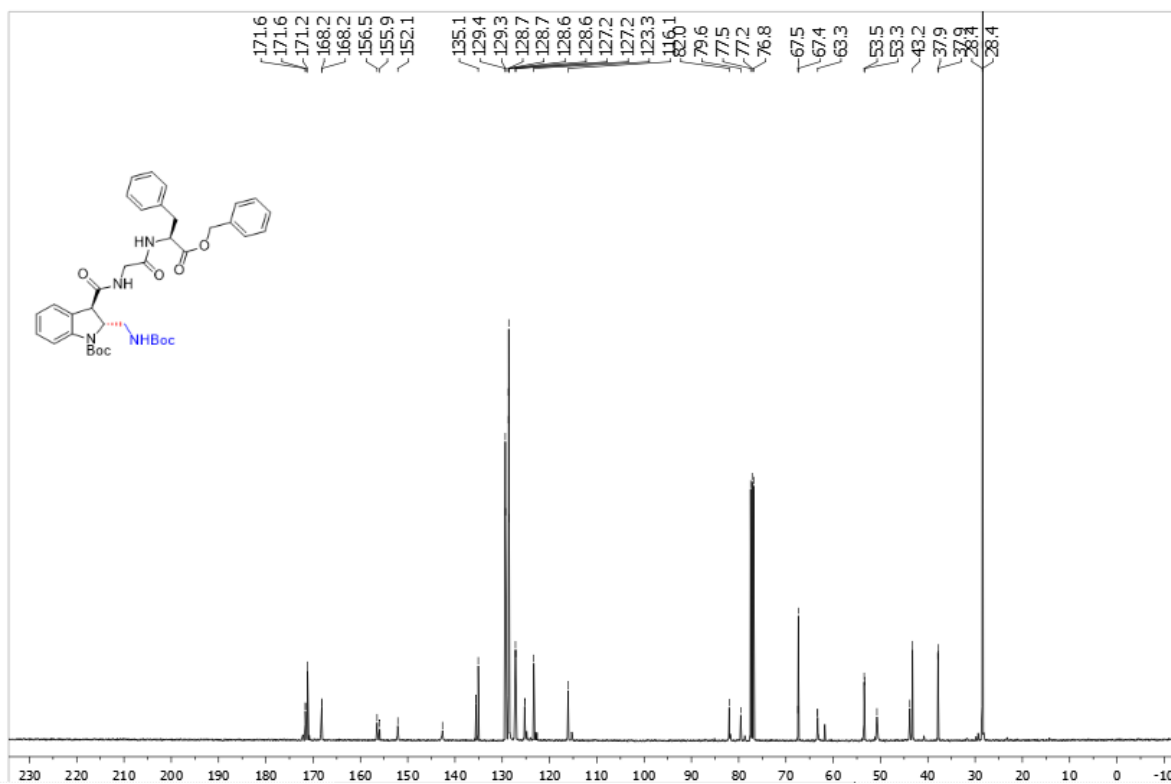

Supplementary Figure 142. <sup>13</sup>C NMR spectra of *trans*-3av

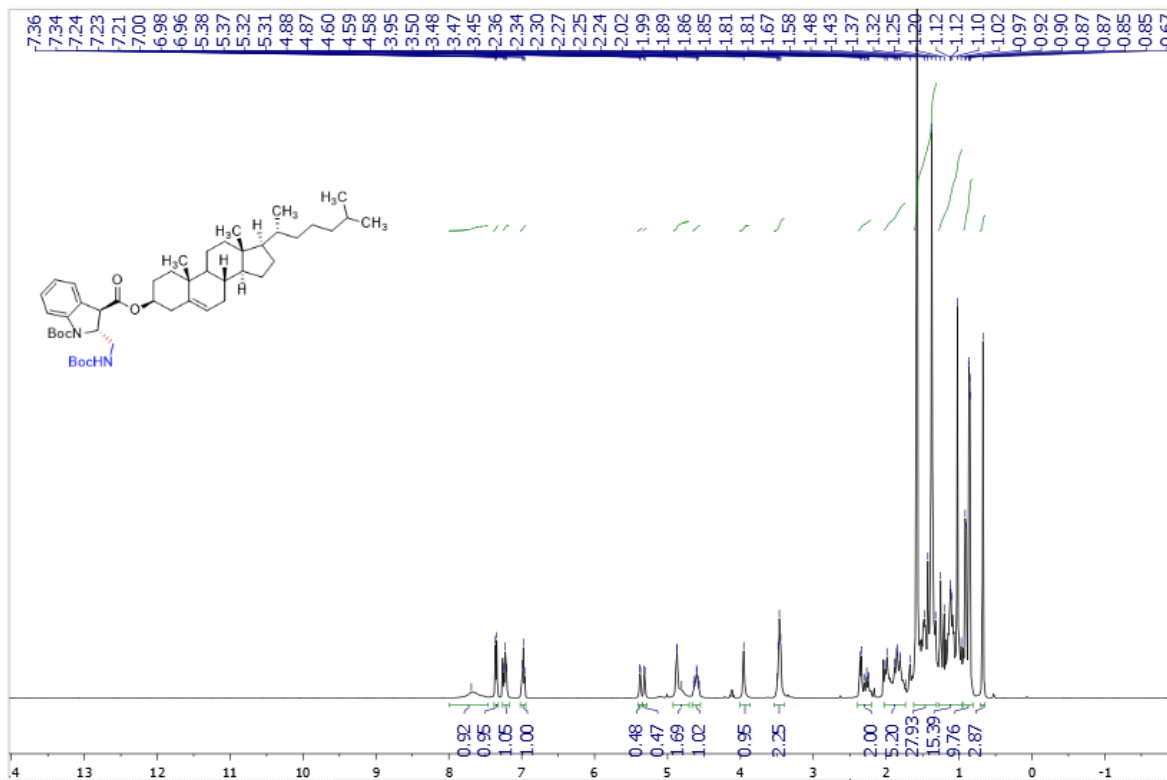

Supplementary Figure 143. <sup>1</sup>H NMR spectra of *trans*-3aw

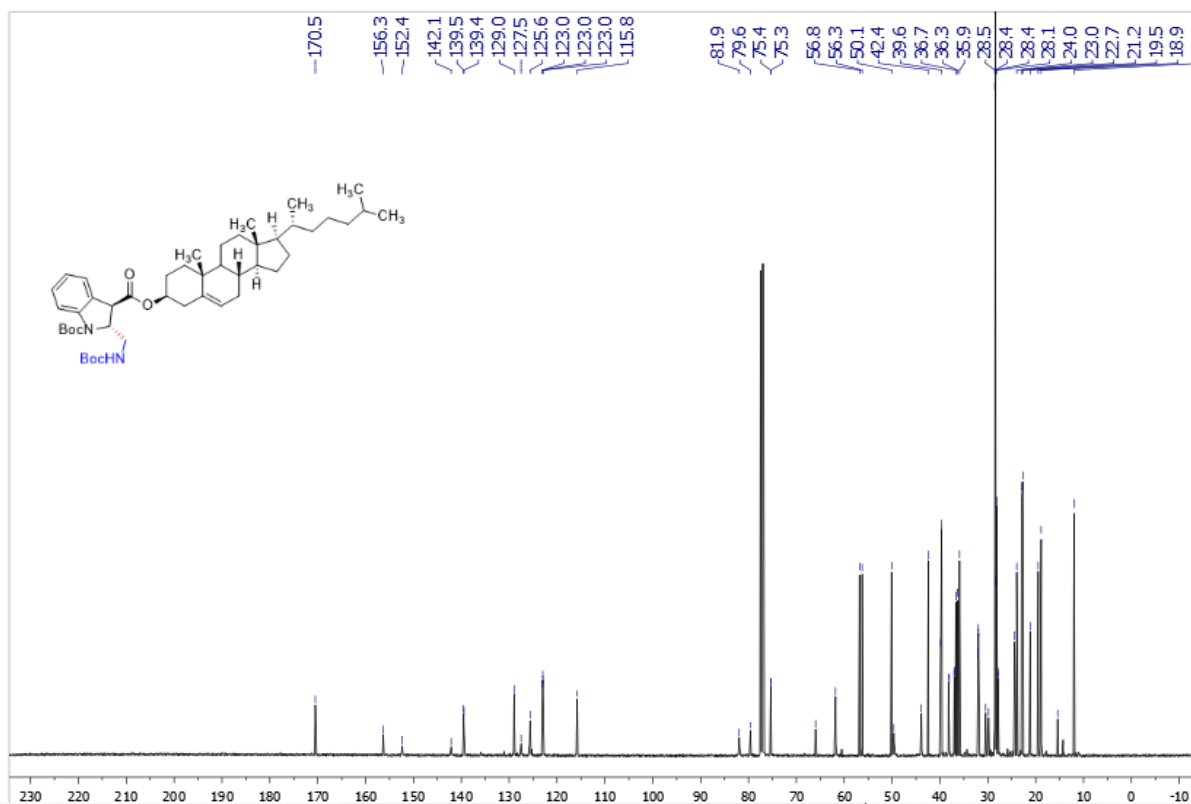

Supplementary Figure 144. <sup>13</sup>C NMR spectra of *trans*-3aw



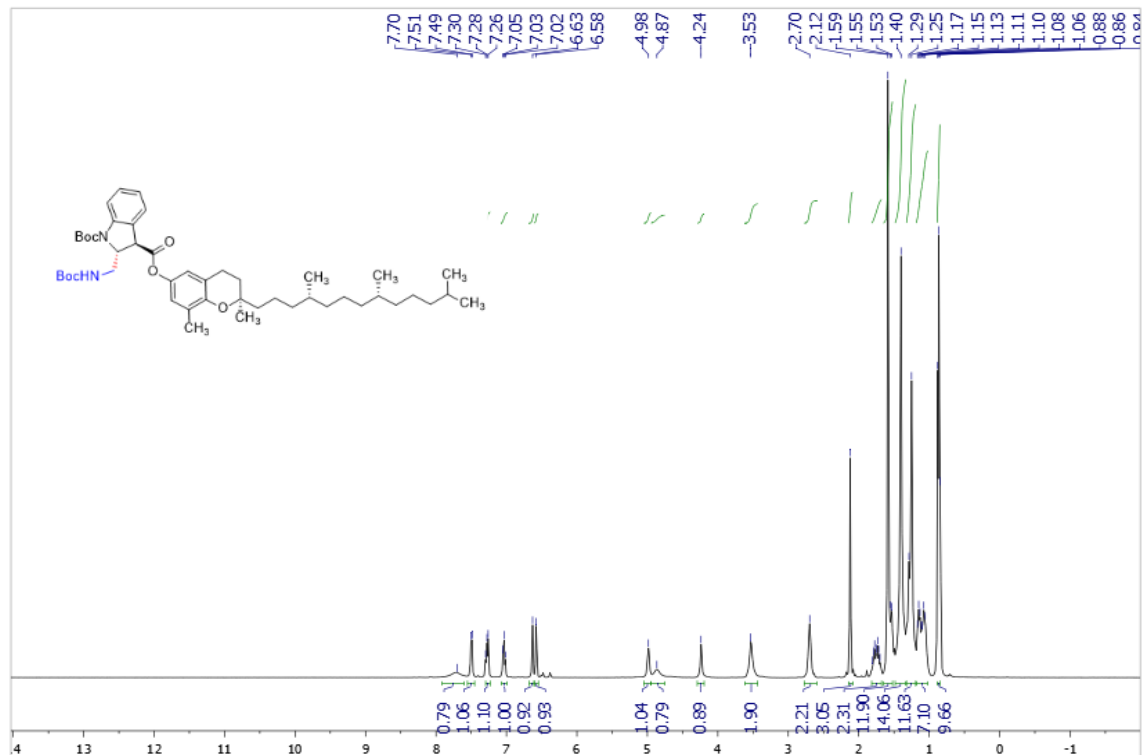

Supplementary Figure 145. <sup>1</sup>H NMR spectra of *trans*-3ax

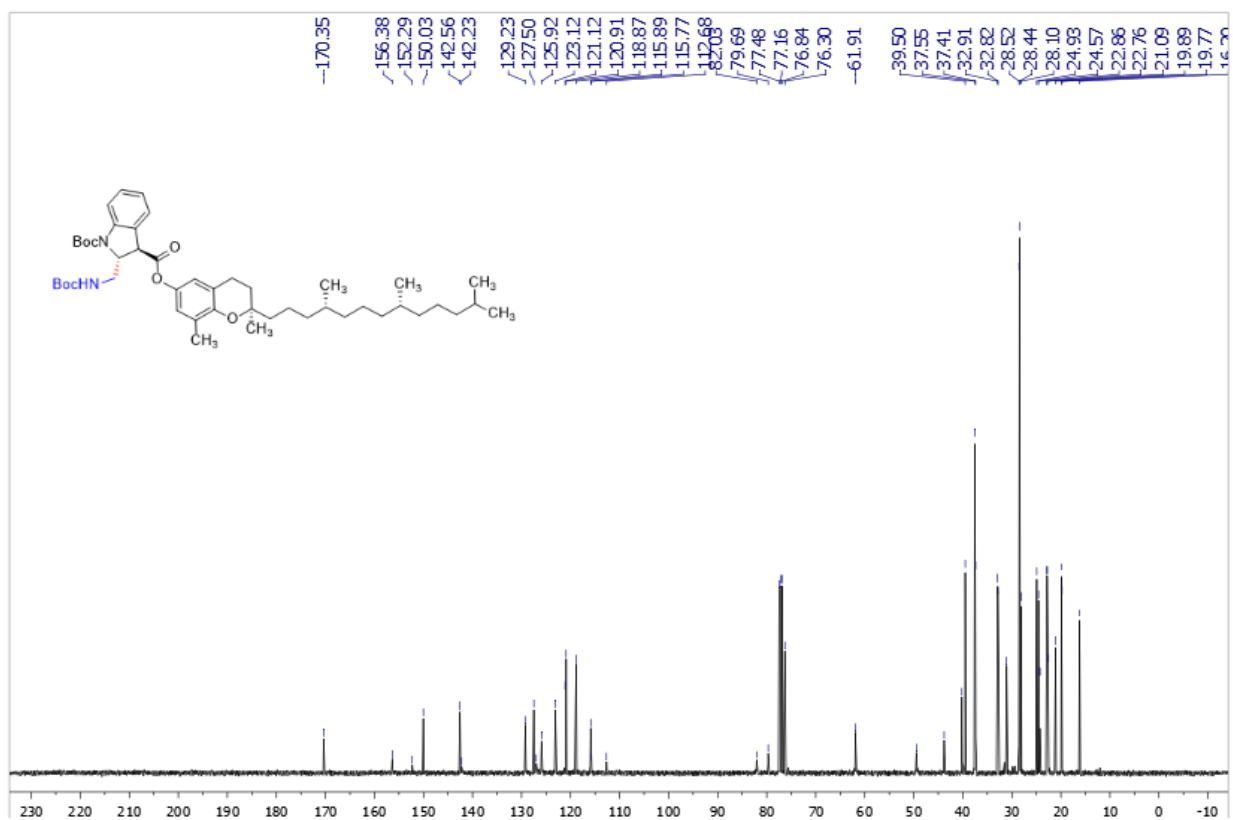

Supplementary Figure 146. <sup>13</sup>C NMR spectra of *trans*-3ax

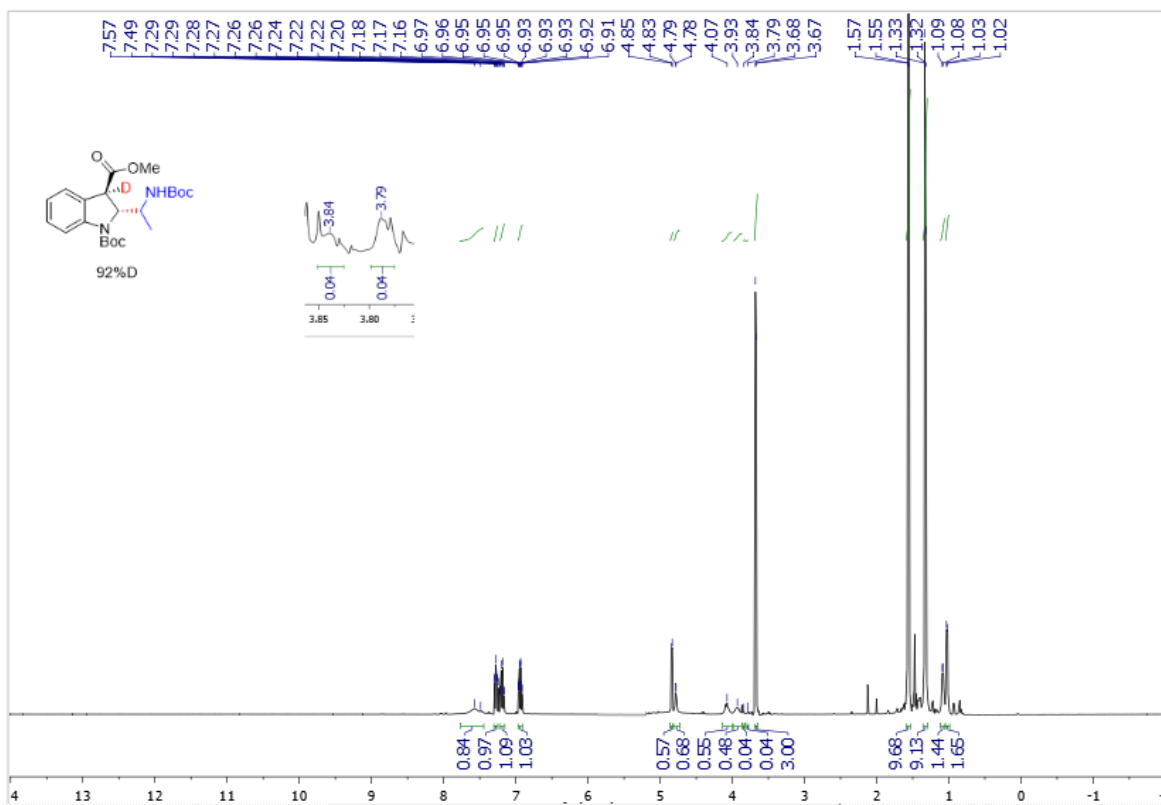

Supplementary Figure 147.  $^1\text{H}$  NMR spectra of *trans*-3a-d

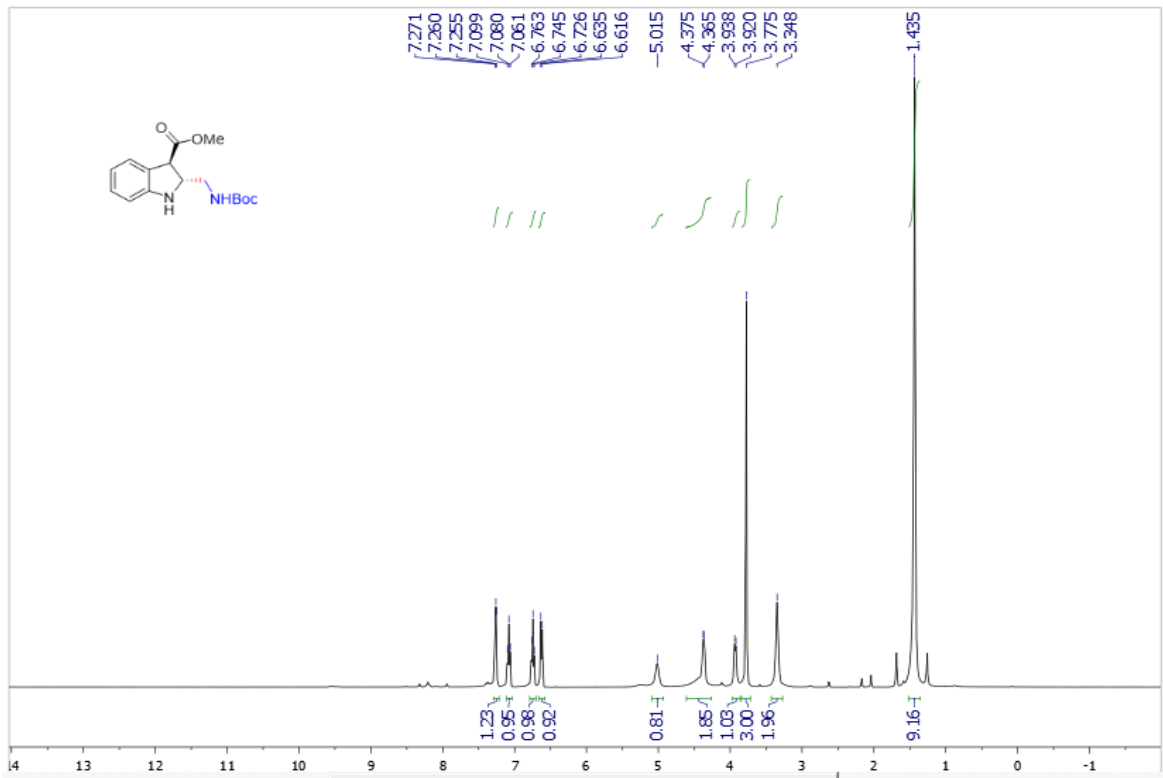

Supplementary Figure 148.  $^1\text{H}$  NMR spectra of *trans*-4k

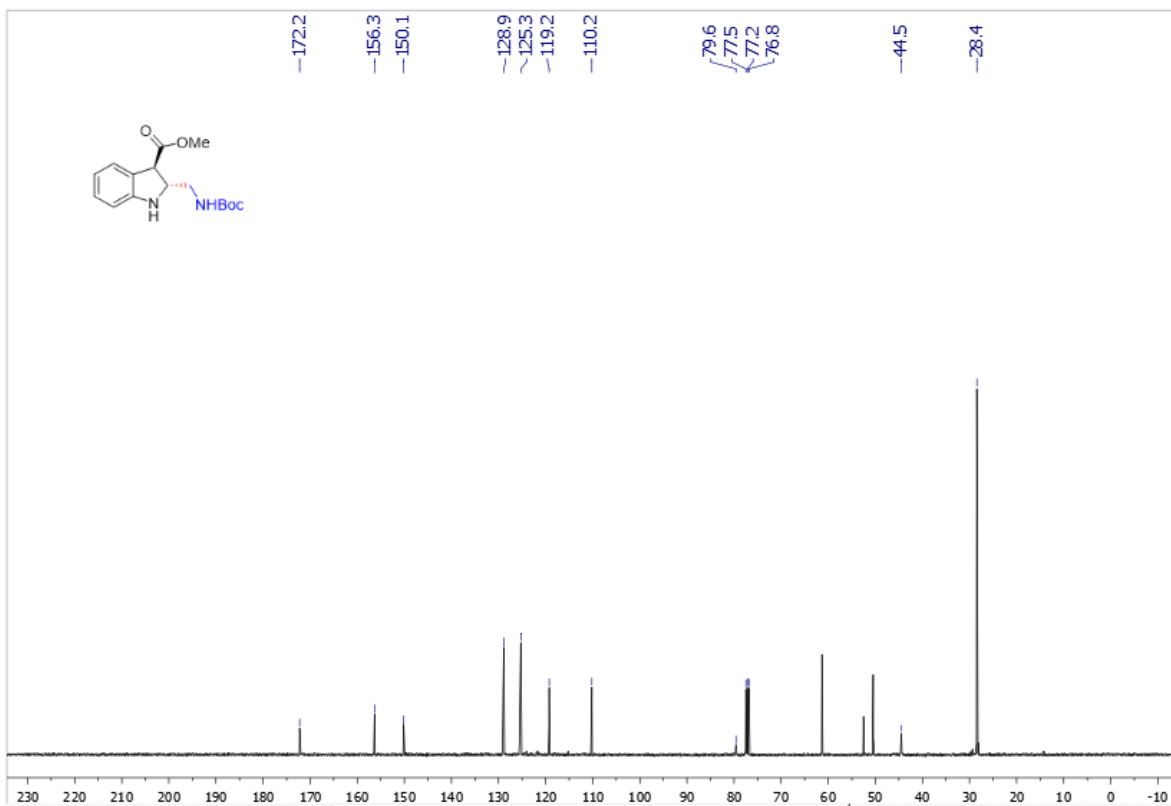

Supplementary Figure 149.  $^{13}\text{C}$  NMR spectra of *trans*-4k

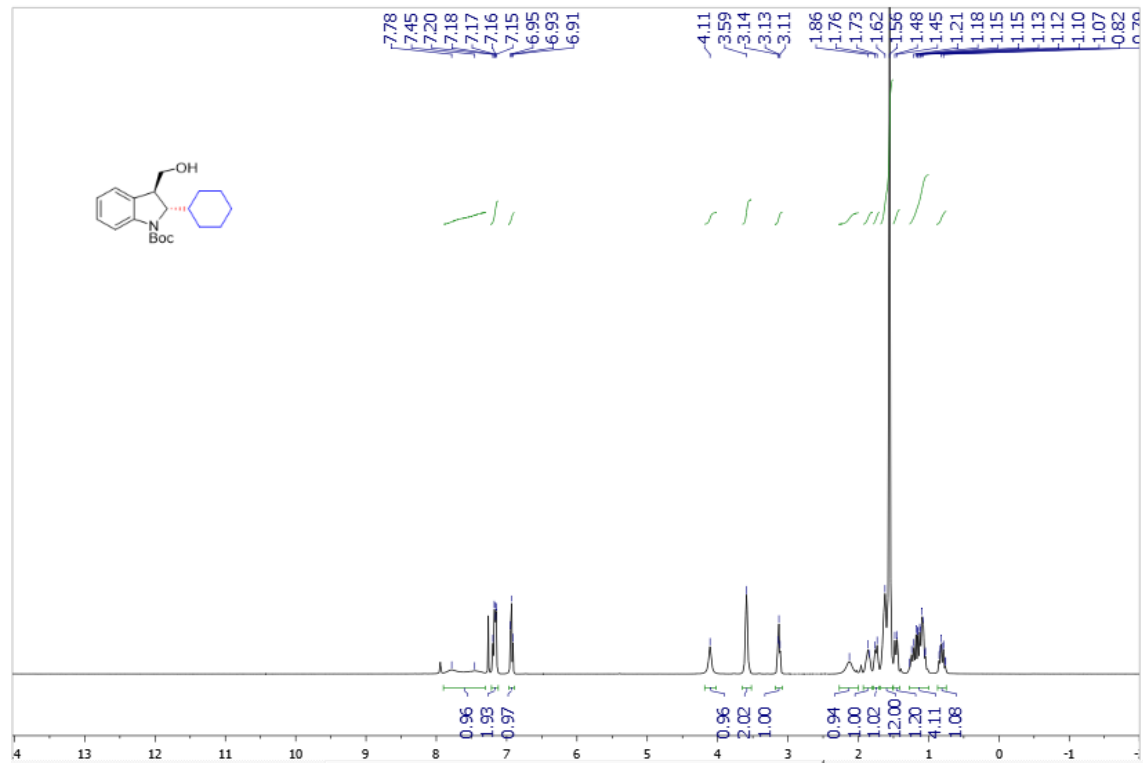

Supplementary Figure 150.  $^1\text{H}$  NMR spectra of *trans*-4aj

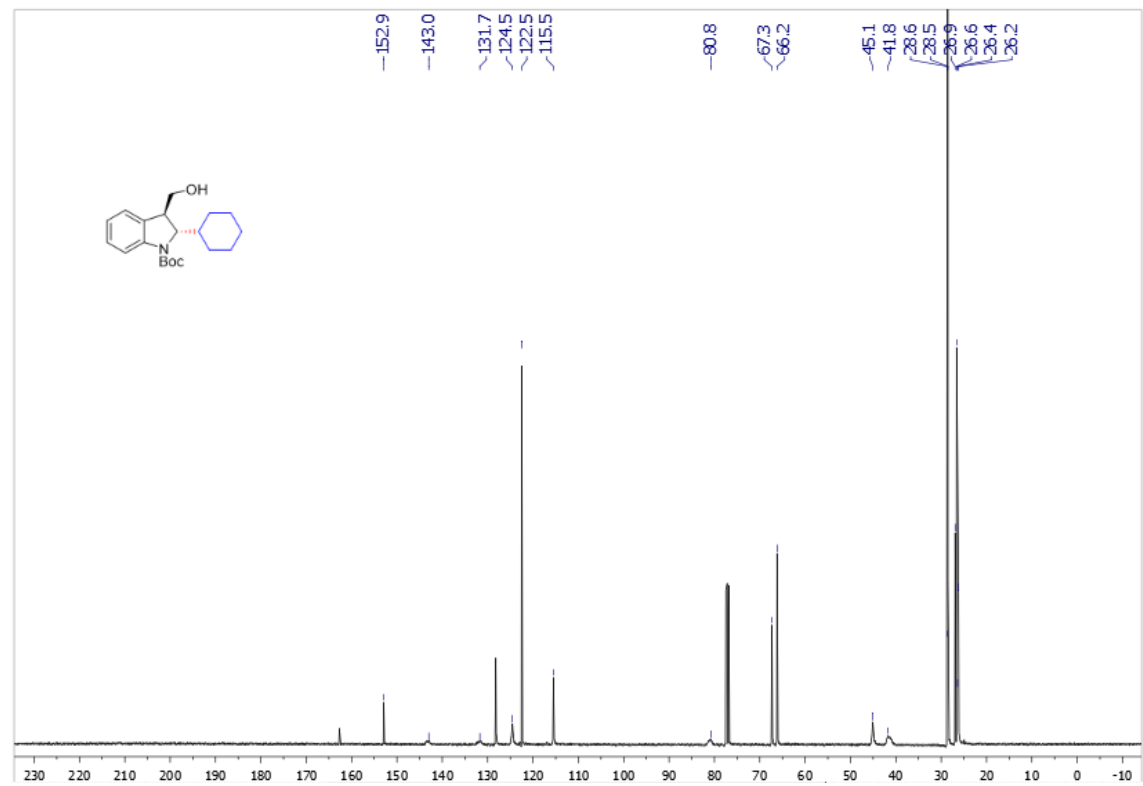

Supplementary Figure 151.  $^{13}\text{C}$  NMR spectra of *trans*-4aj

For original  $^1\text{H}$  and  $^{13}\text{C}$  NMR spectra of **7a**, **7g**, **7h**, **7p**, **7q**, **7r**, **7s**, **7t**, **7u**, **7v**, and **7w**, please see corresponding **3v**, **3ah**, **3ag**, **3aj**, **3al**, **3am**, **3aq**, **3ae**, **3ap**, **3an** and **3k**.

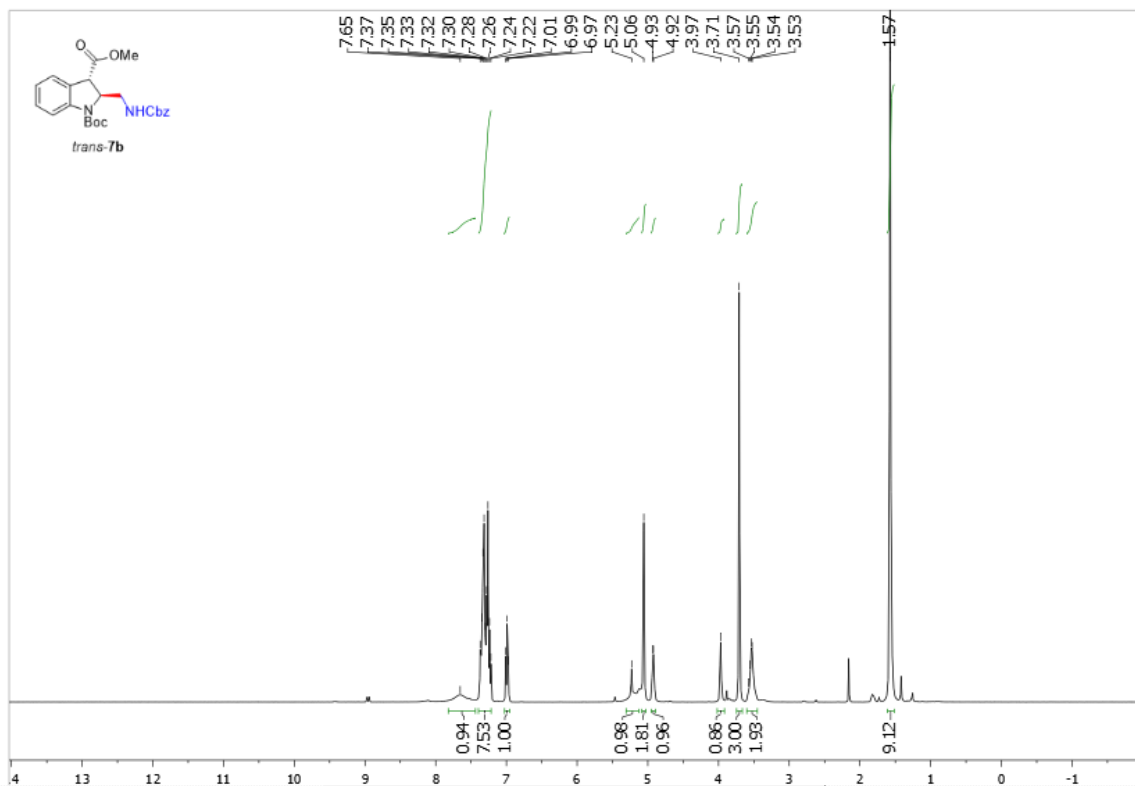

Supplementary Figure 152. <sup>1</sup>H NMR spectra of *trans*-7b

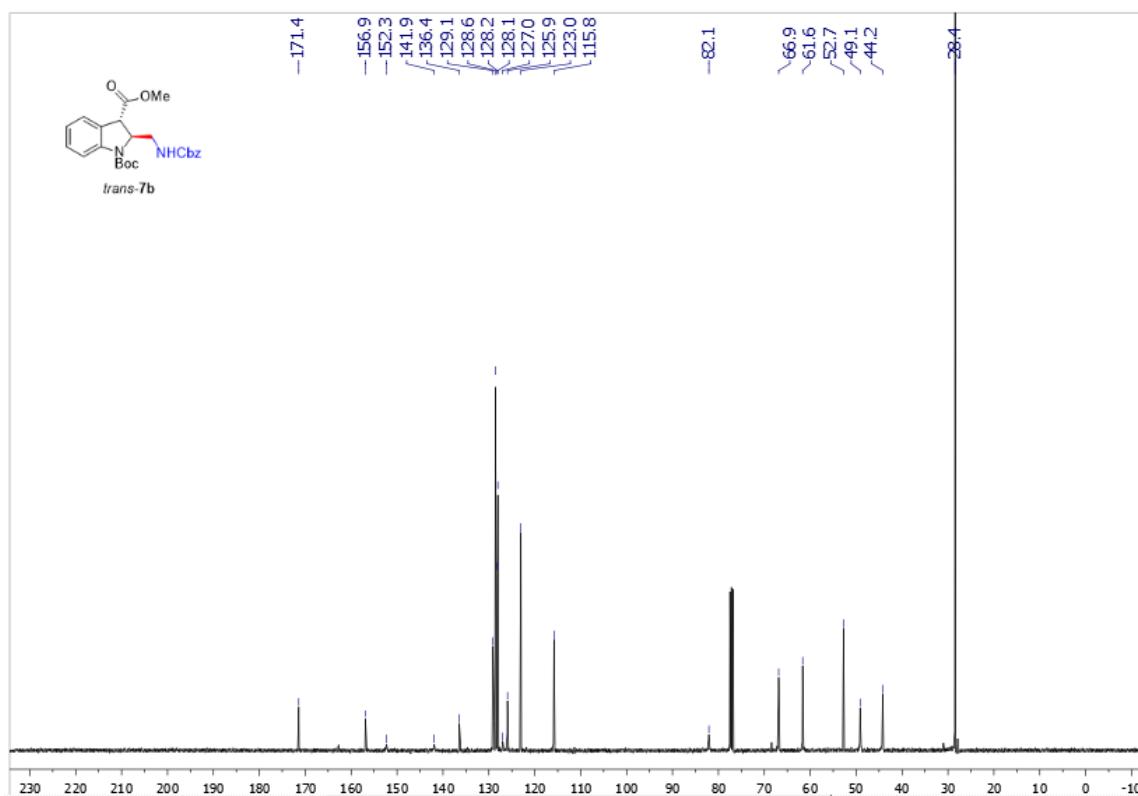

Supplementary Figure 153. <sup>13</sup>C NMR spectra of *trans*-7b

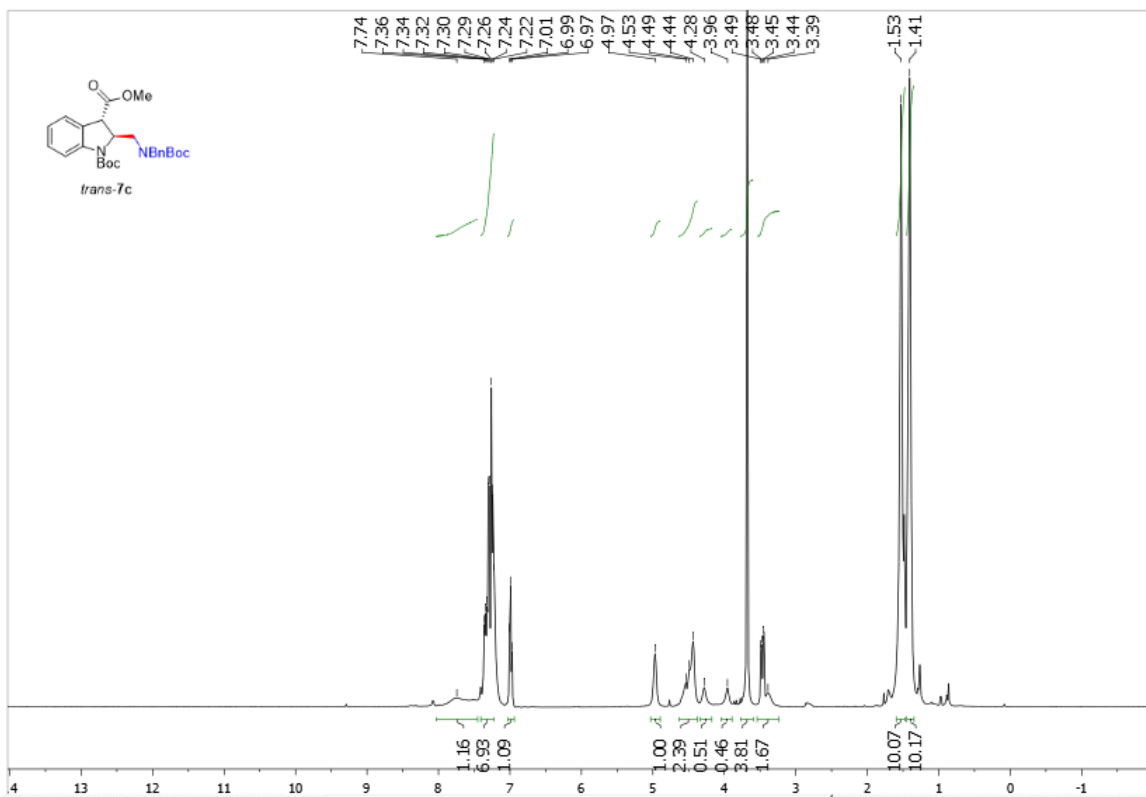

Supplementary Figure 154. <sup>1</sup>H NMR spectra of *trans*-7c

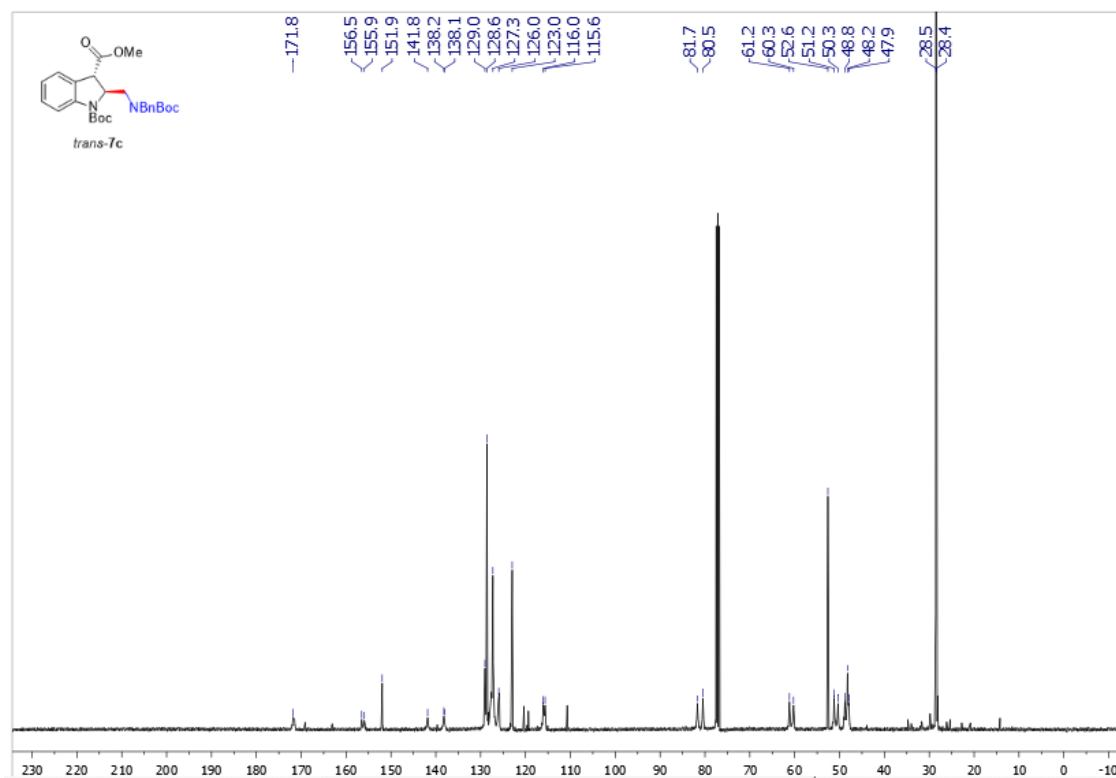

Supplementary Figure 155. <sup>13</sup>C NMR spectra of *trans*-7c

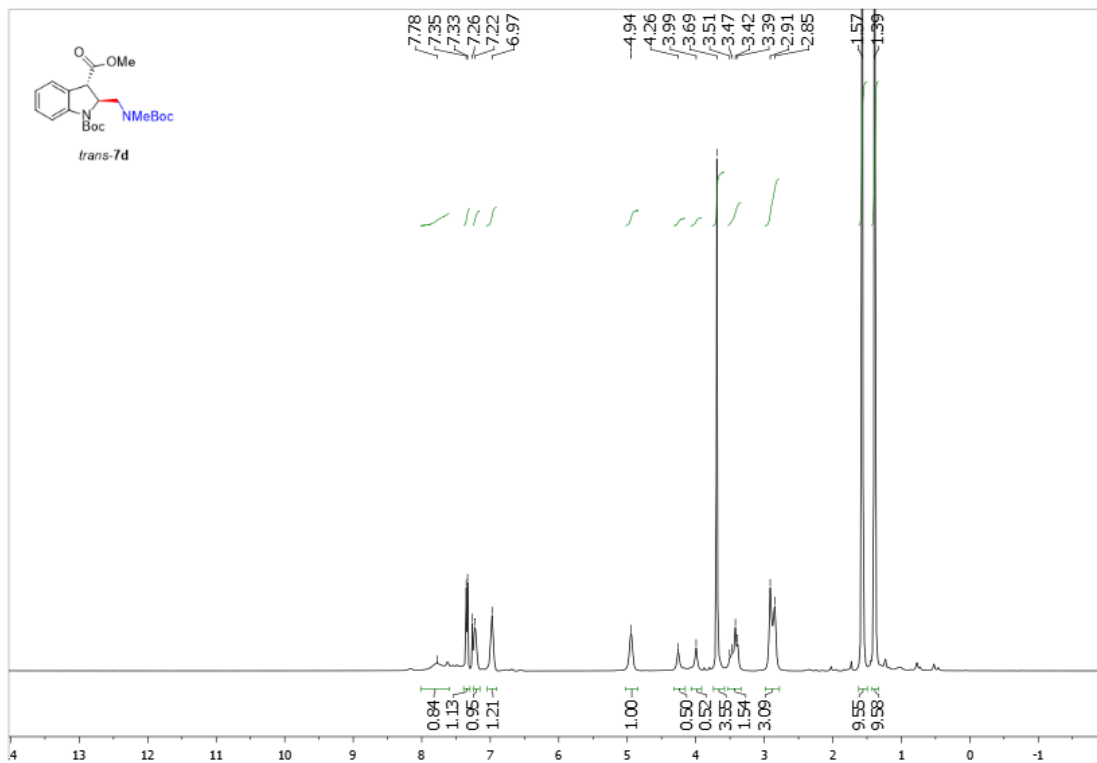

Supplementary Figure 156.  $^1\text{H}$  NMR spectra of *trans*-7d

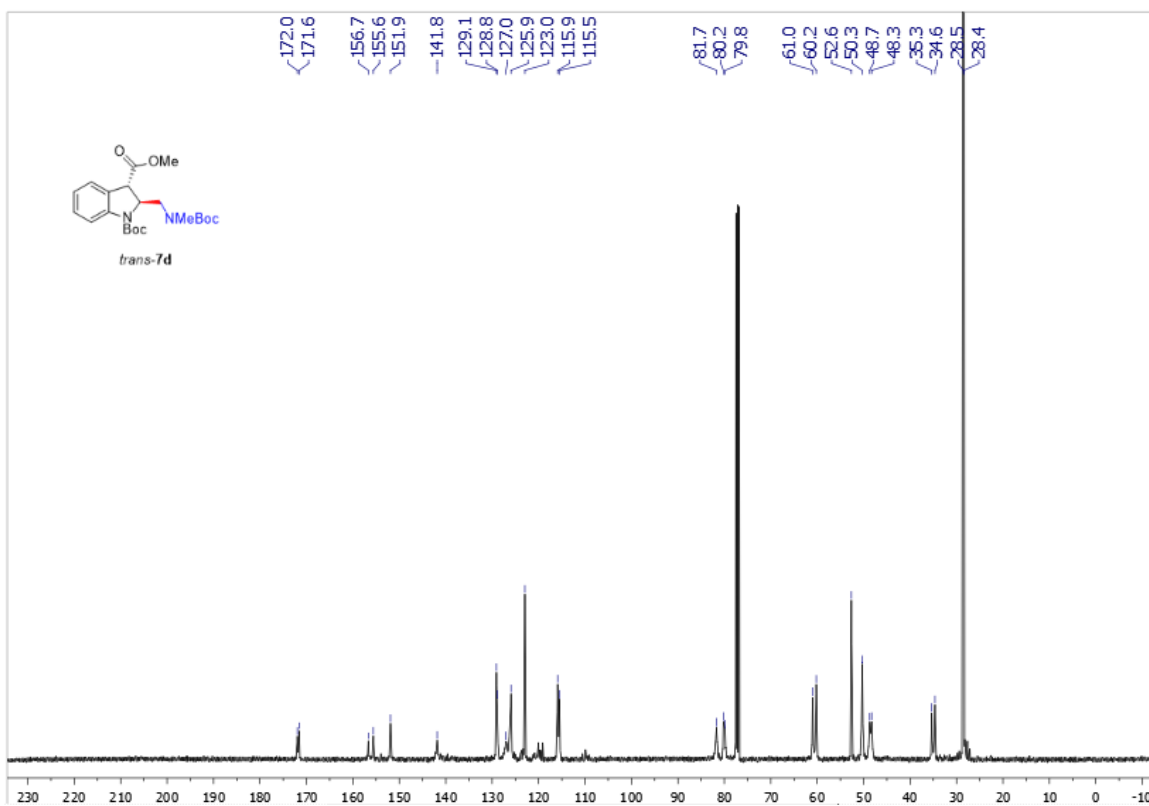

Supplementary Figure 157.  $^{13}\text{C}$  NMR spectra of *trans*-7d



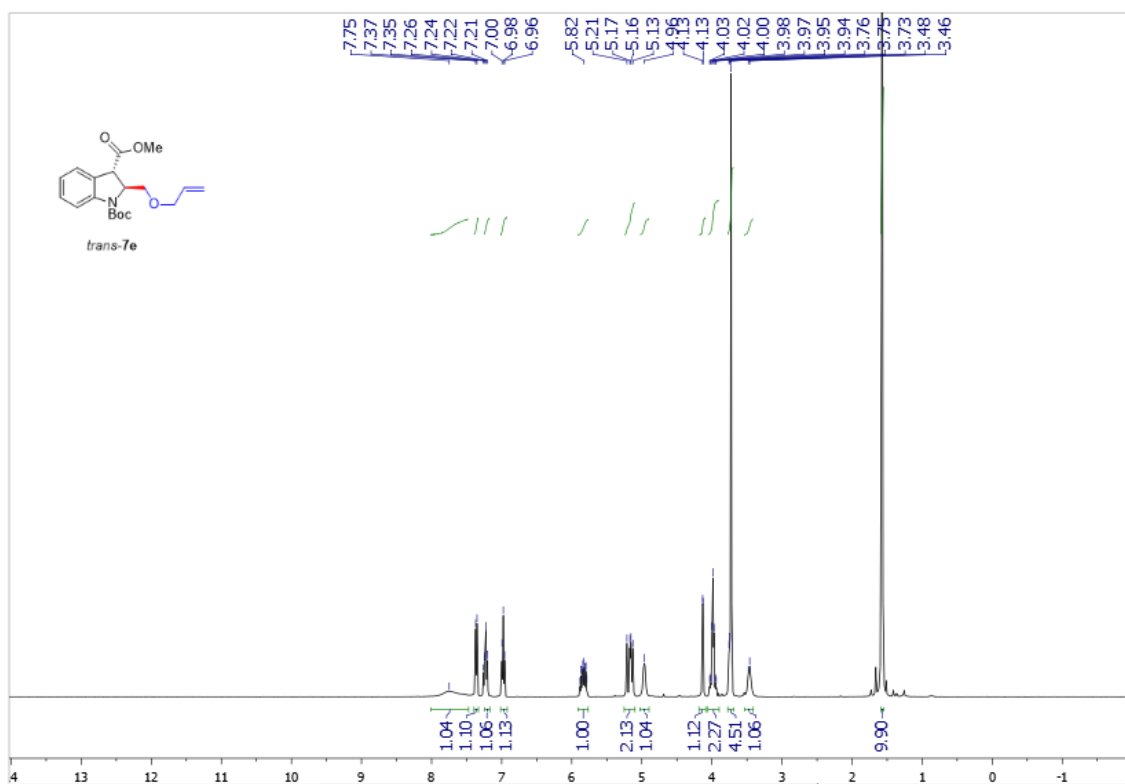

Supplementary Figure 158. <sup>1</sup>H NMR spectra of *trans-7e*

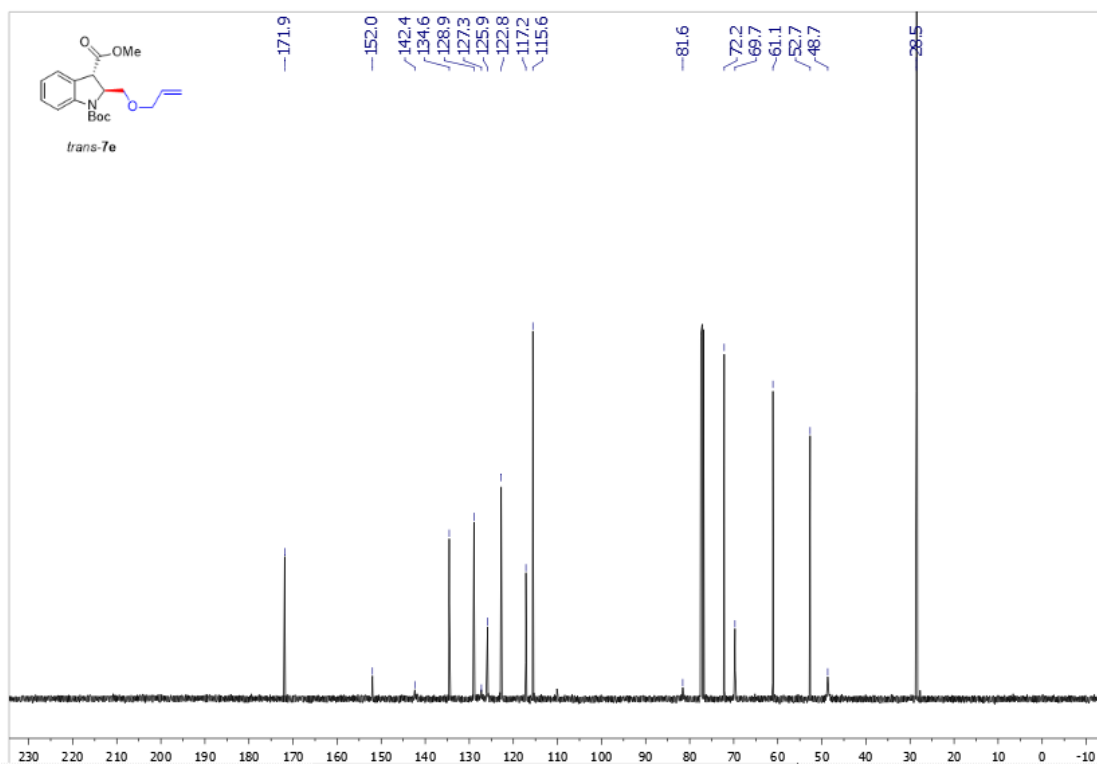

Supplementary Figure 159. <sup>13</sup>C NMR spectra of *trans-7e*

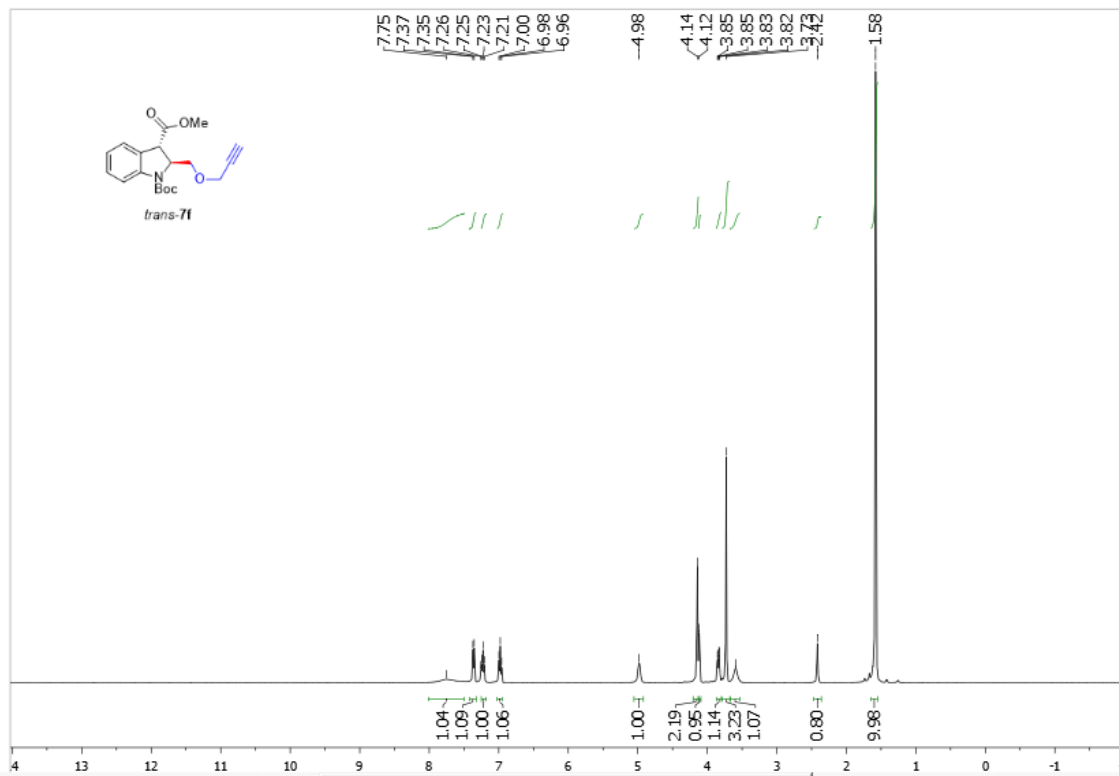

Supplementary Figure 160.  $^1\text{H}$  NMR spectra of *trans*-7f

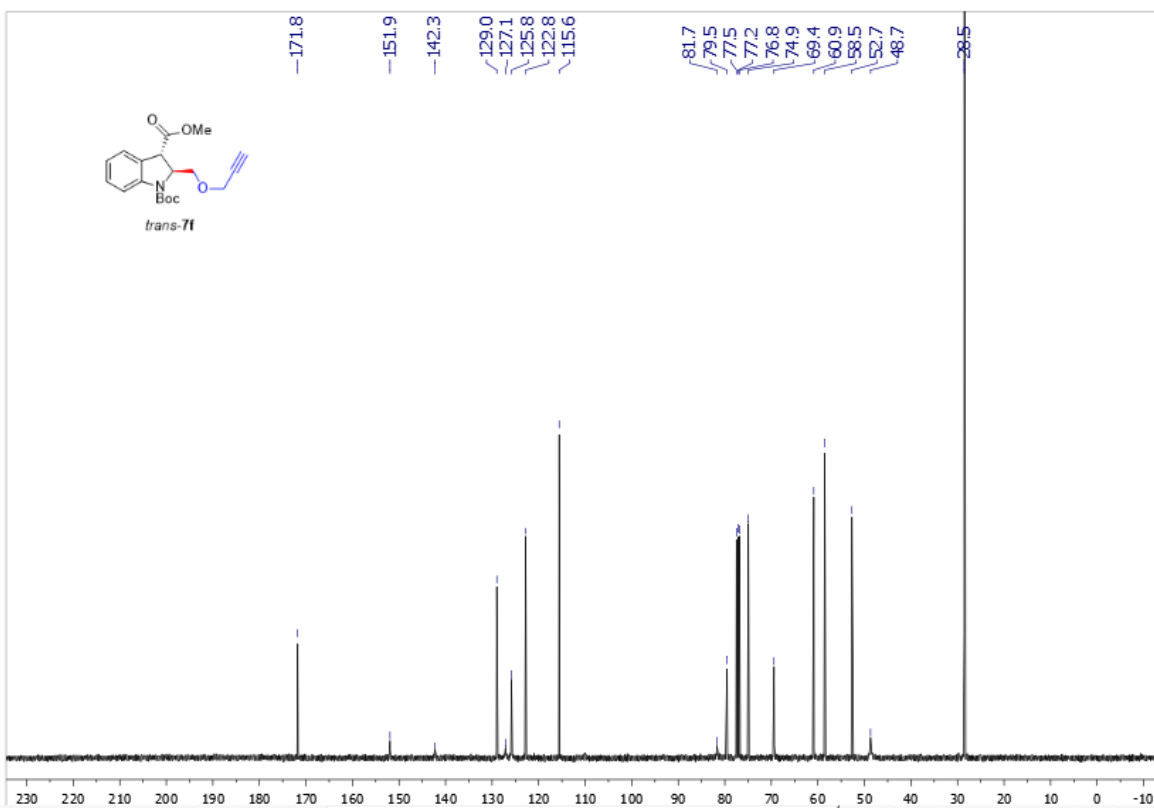

Supplementary Figure 161.  $^{13}\text{C}$  NMR spectra of *trans*-7f

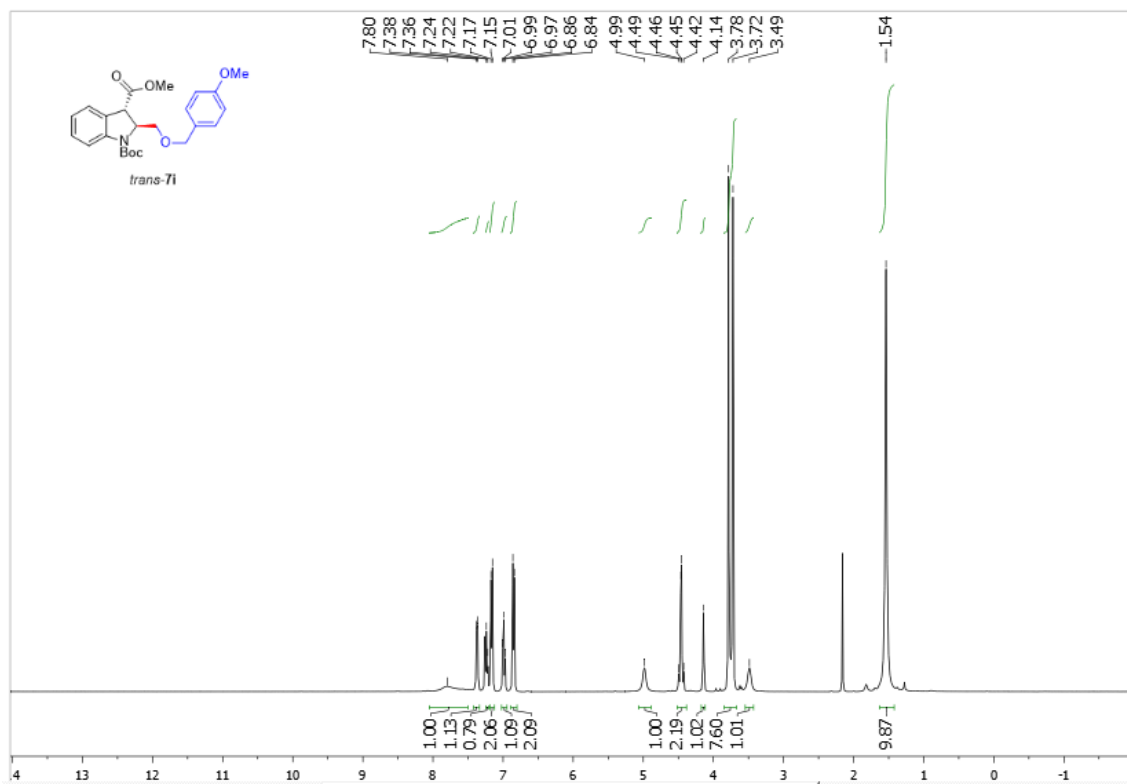

Supplementary Figure 162. <sup>1</sup>H NMR spectra of *trans*-7i

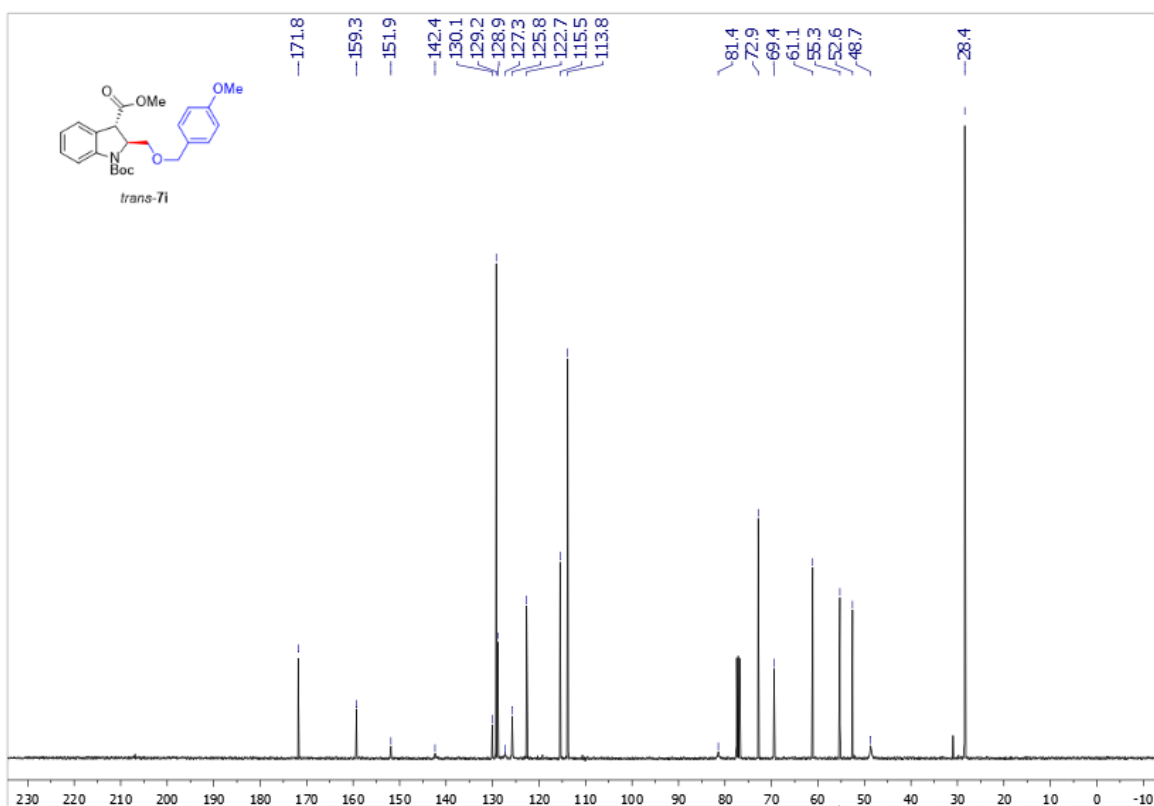

Supplementary Figure 163. <sup>13</sup>C NMR spectra of *trans*-7i

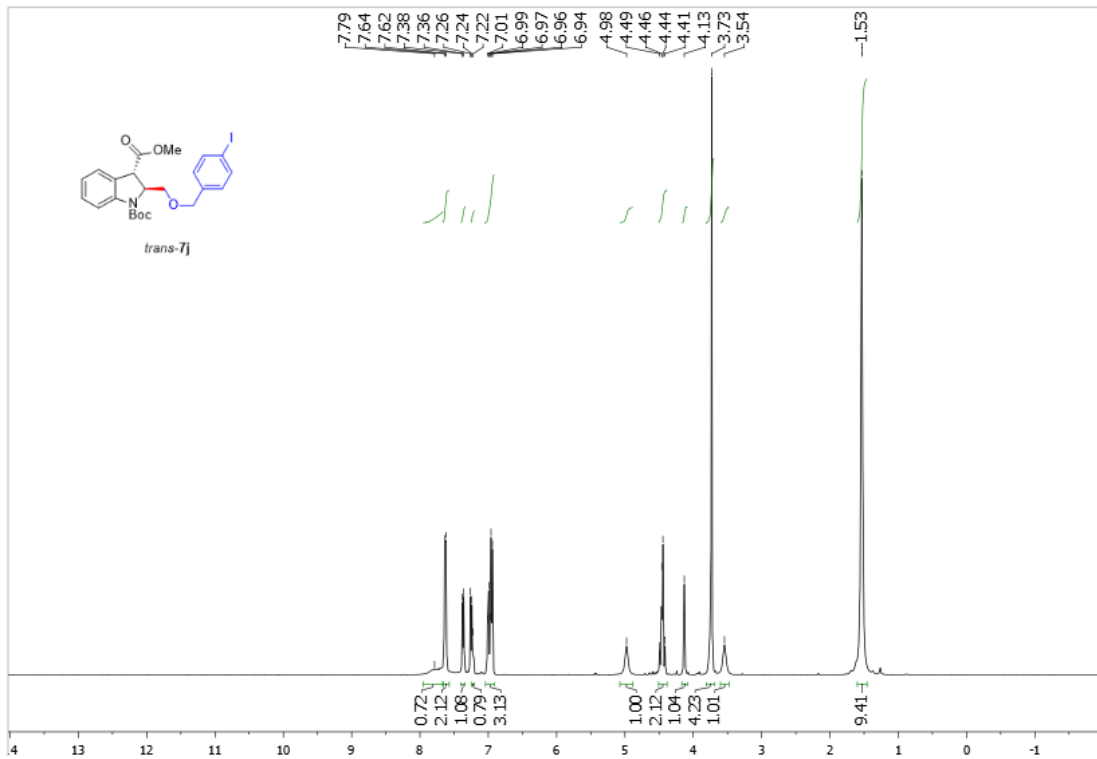

Supplementary Figure 164. <sup>1</sup>H NMR spectra of *trans*-7j

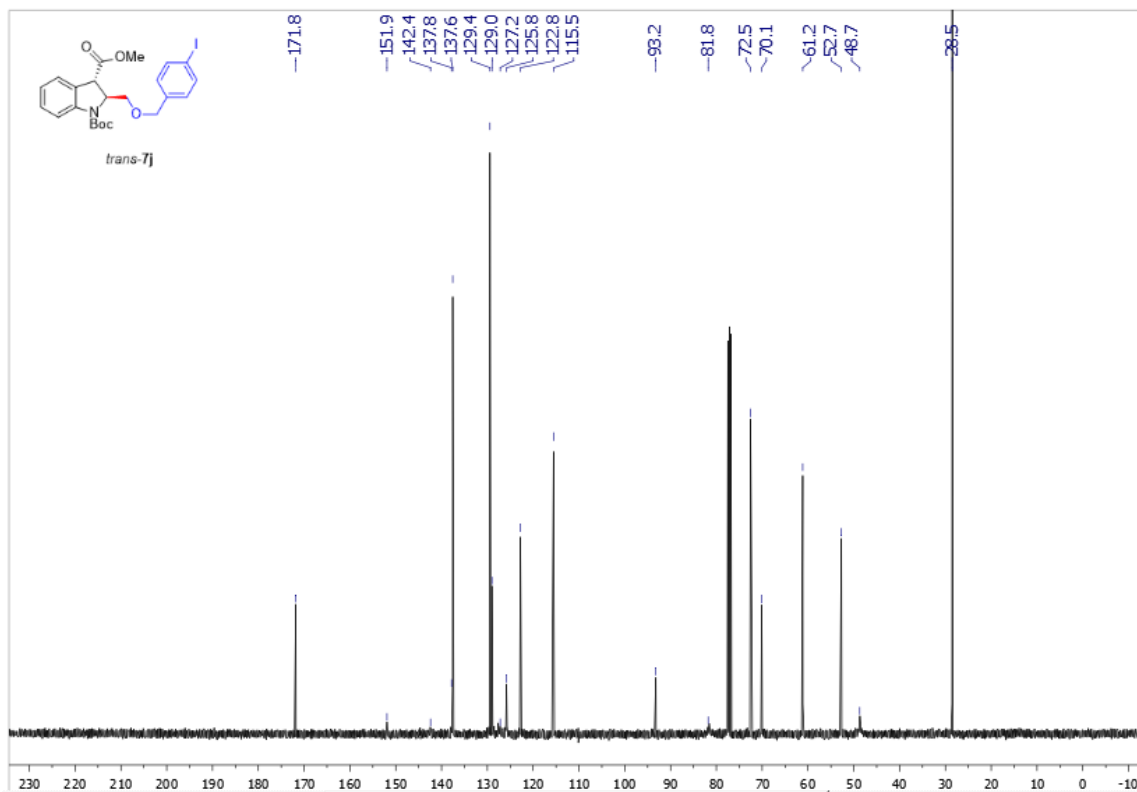

Supplementary Figure 165. <sup>13</sup>C NMR spectra of *trans*-7j

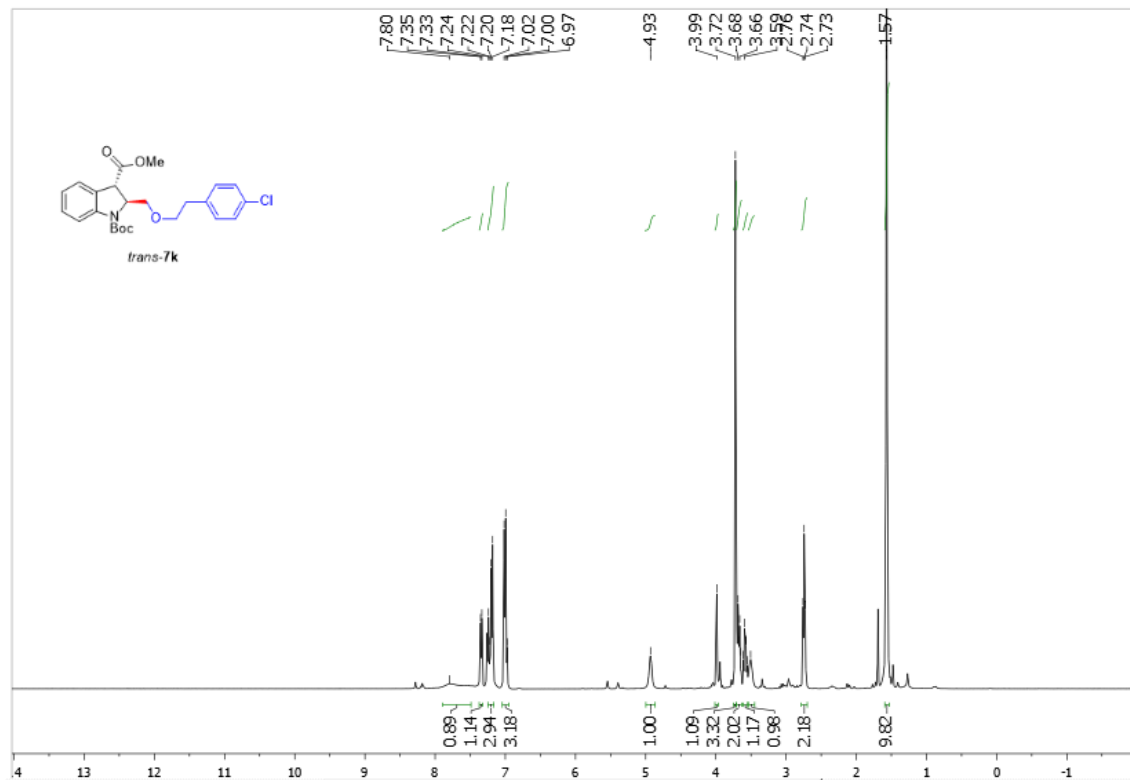

Supplementary Figure 166. <sup>1</sup>H NMR spectra of *trans*-7k

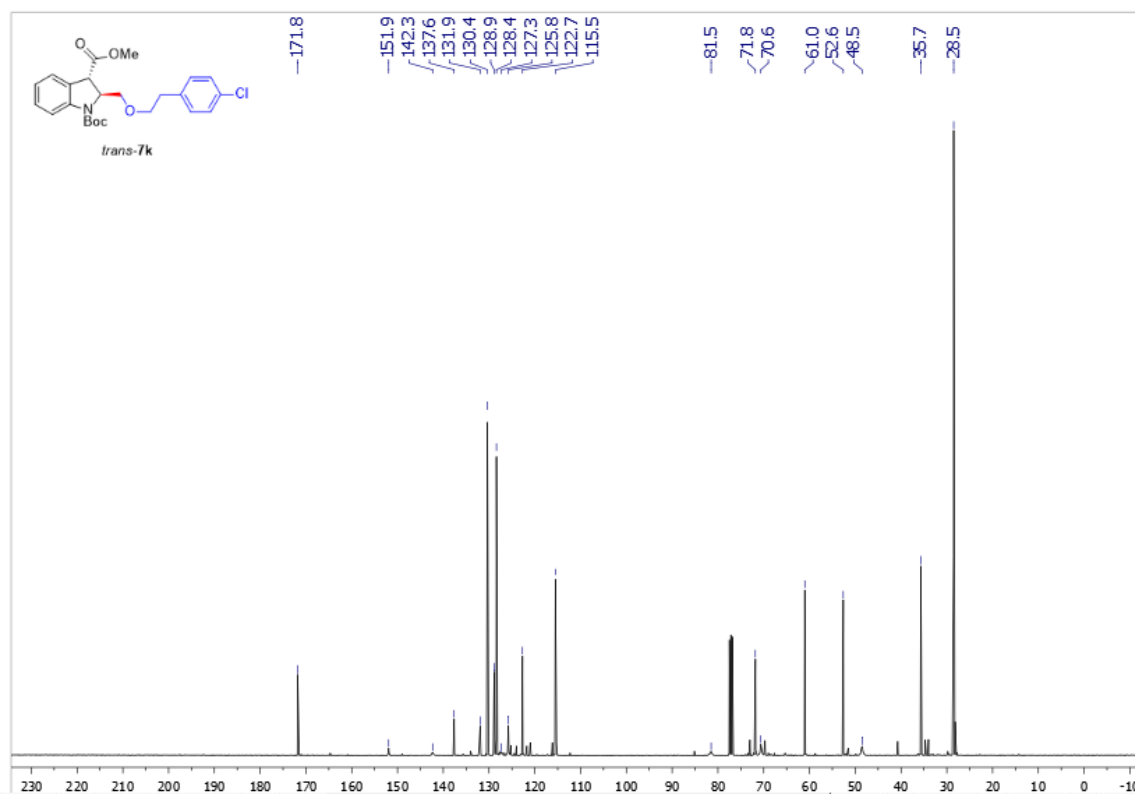

Supplementary Figure 167. <sup>13</sup>C NMR spectra of *trans*-7k

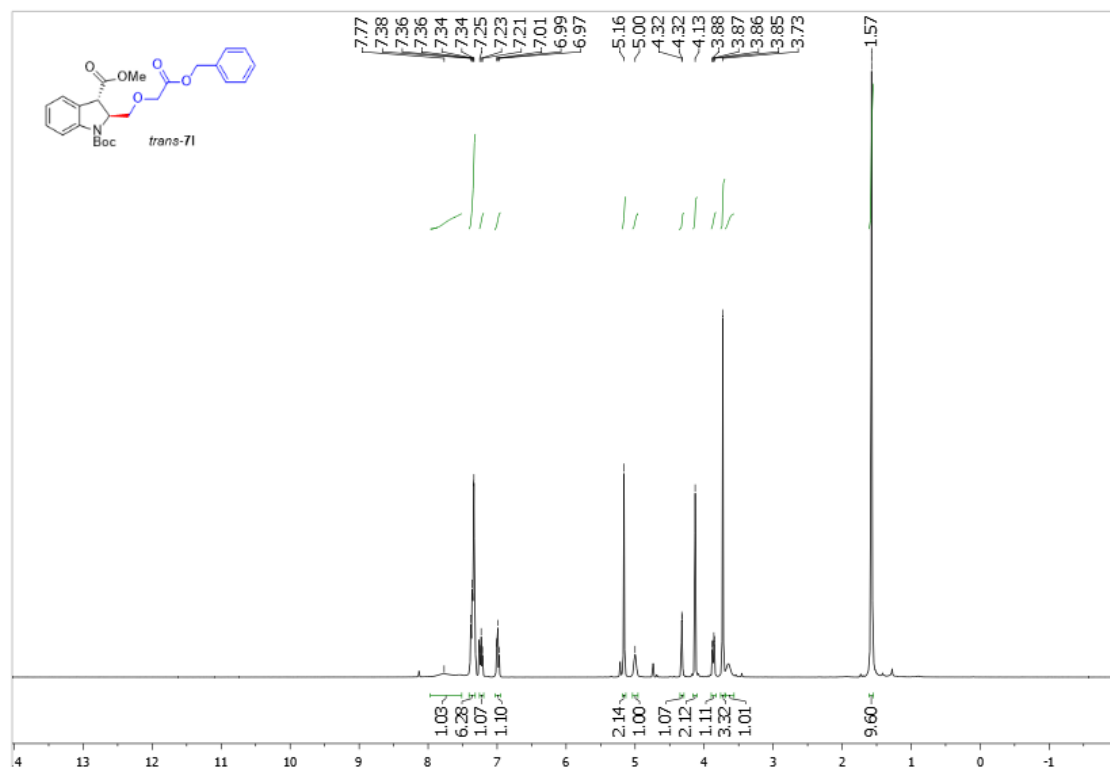

Supplementary Figure 168. <sup>1</sup>H NMR spectra of *trans*-71

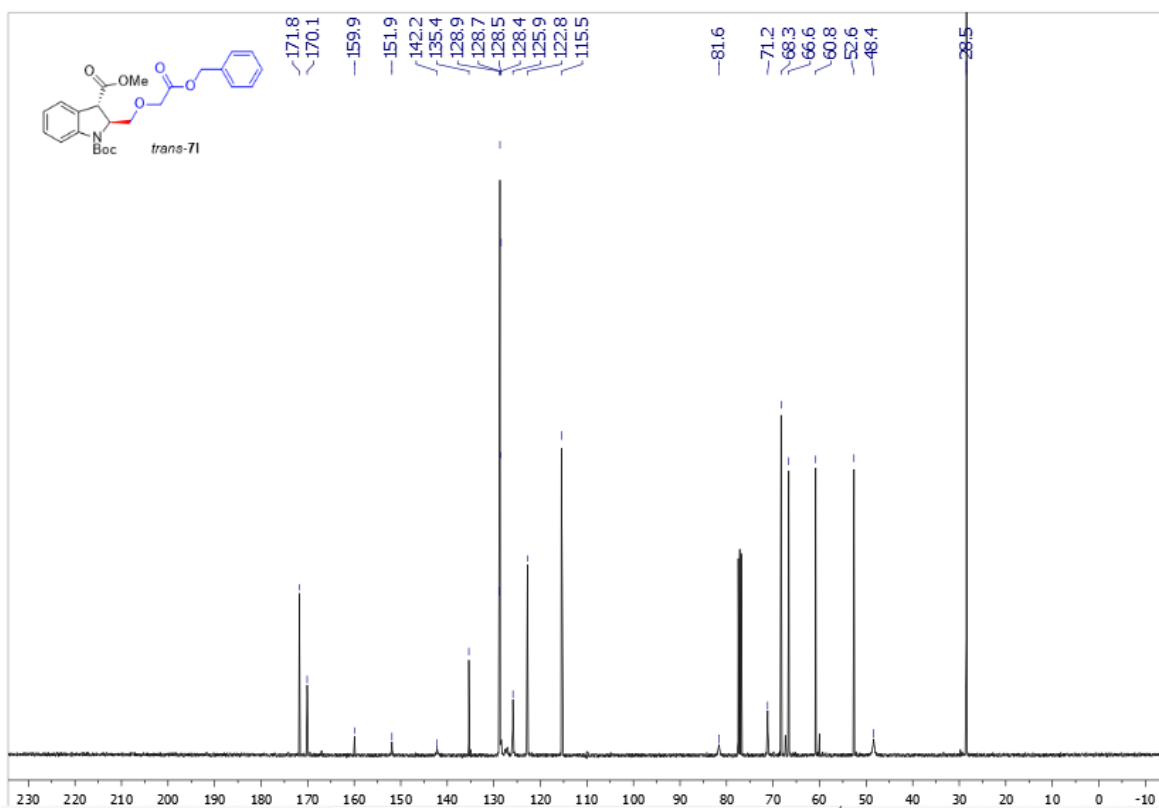

Supplementary Figure 169. <sup>13</sup>C NMR spectra of *trans*-71

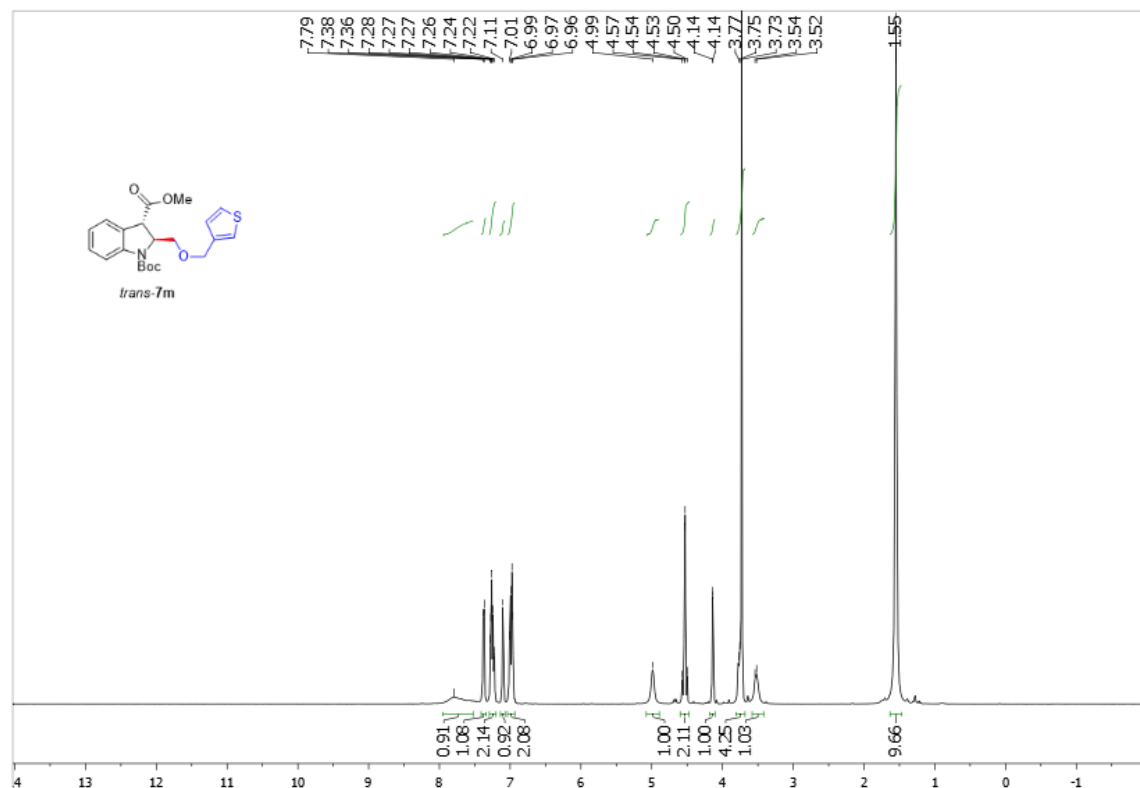

Supplementary Figure 170. <sup>1</sup>H NMR spectra of *trans*-7m

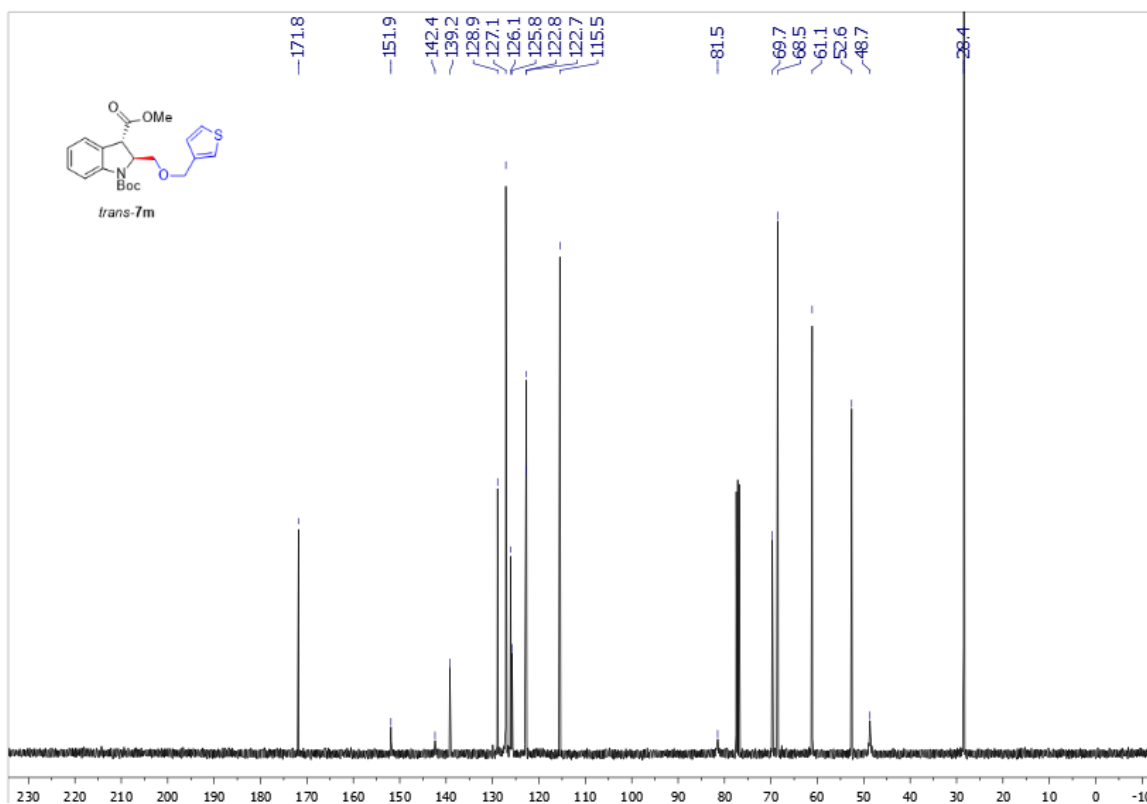

Supplementary Figure 171. <sup>13</sup>C NMR spectra of *trans*-7m

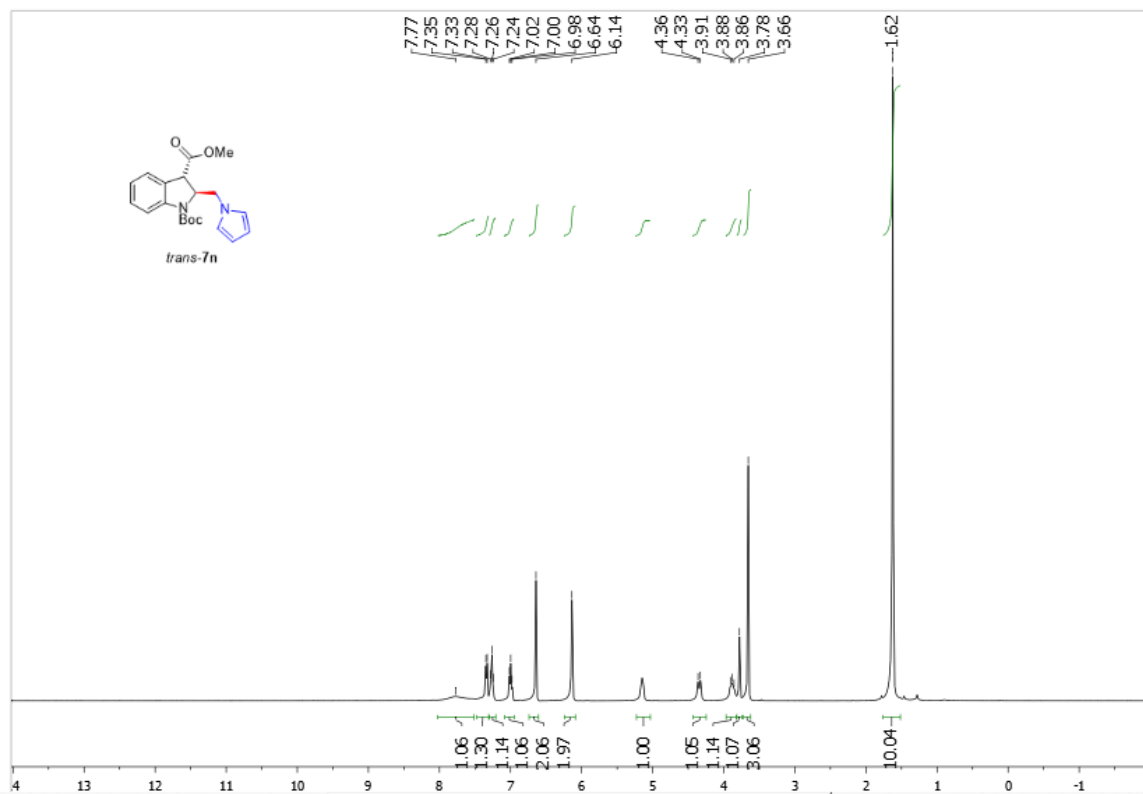

Supplementary Figure 172.  $^1\text{H}$  NMR spectra of *trans-7n*

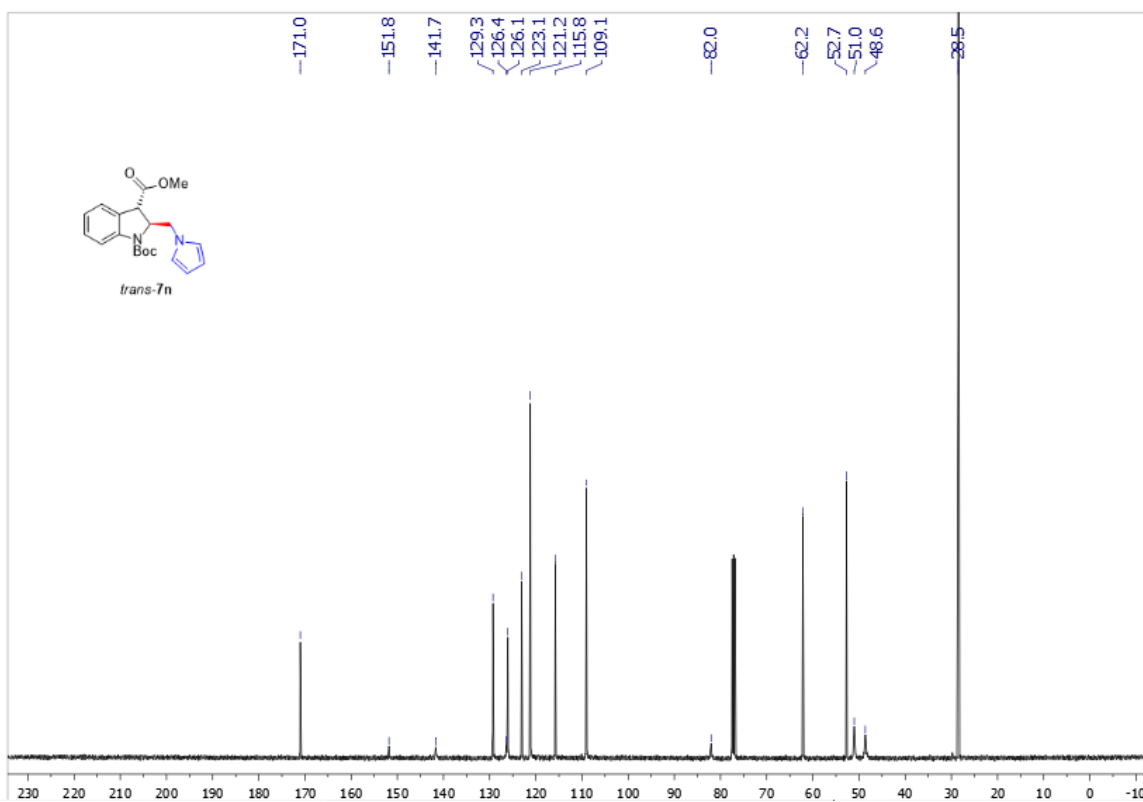

Supplementary Figure 173.  $^{13}\text{C}$  NMR spectra of *trans-7n*



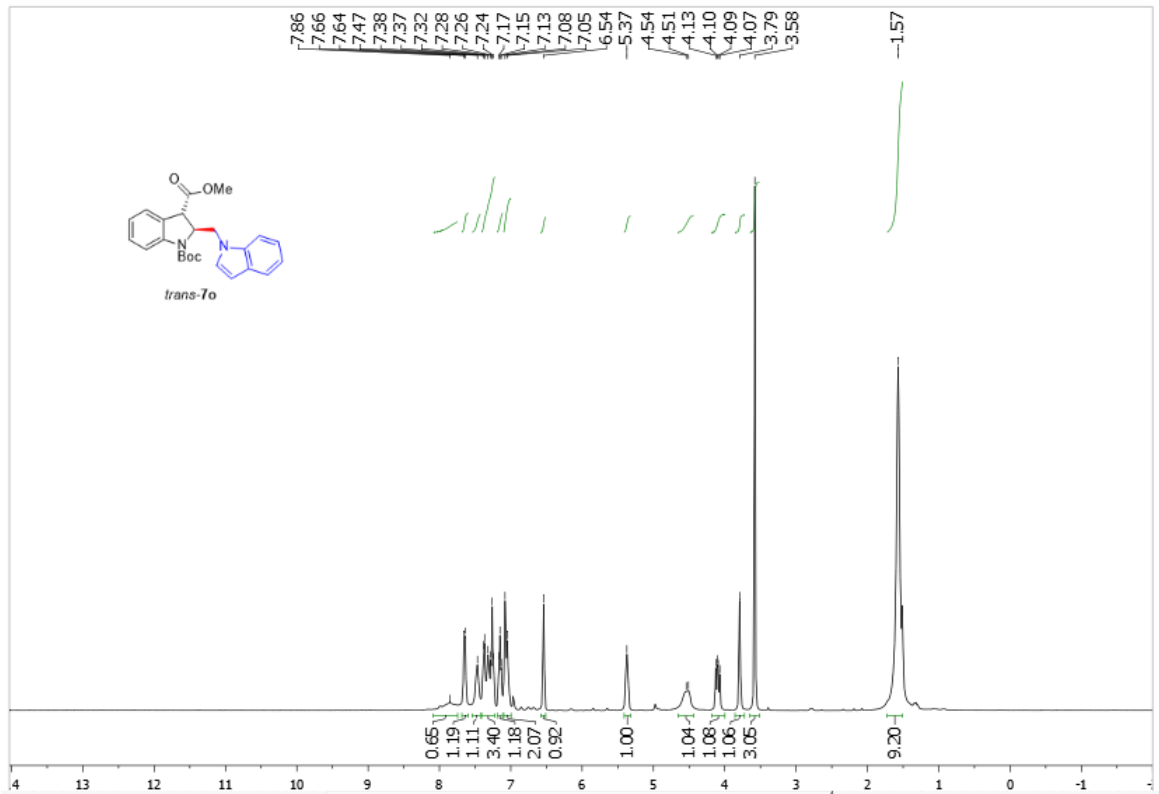

Supplementary Figure 174. <sup>1</sup>H NMR spectra of *trans*-7o

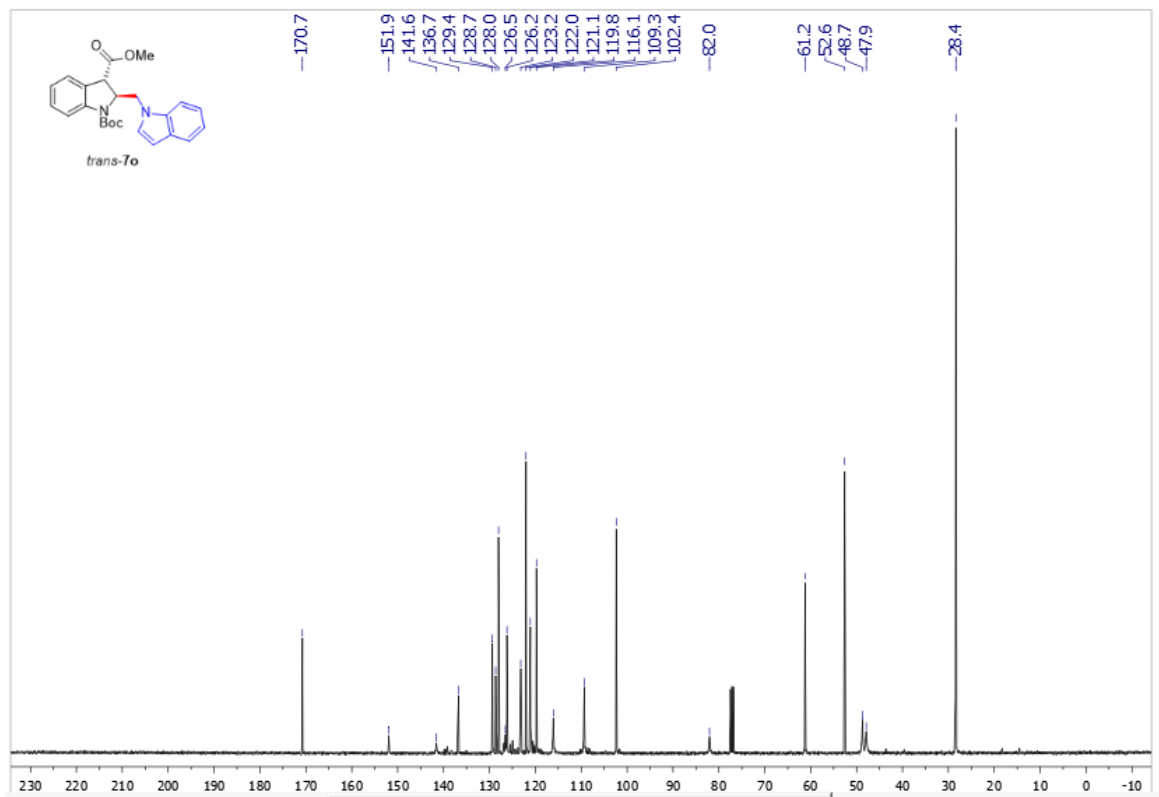

Supplementary Figure 175. <sup>13</sup>C NMR spectra of *trans*-7o

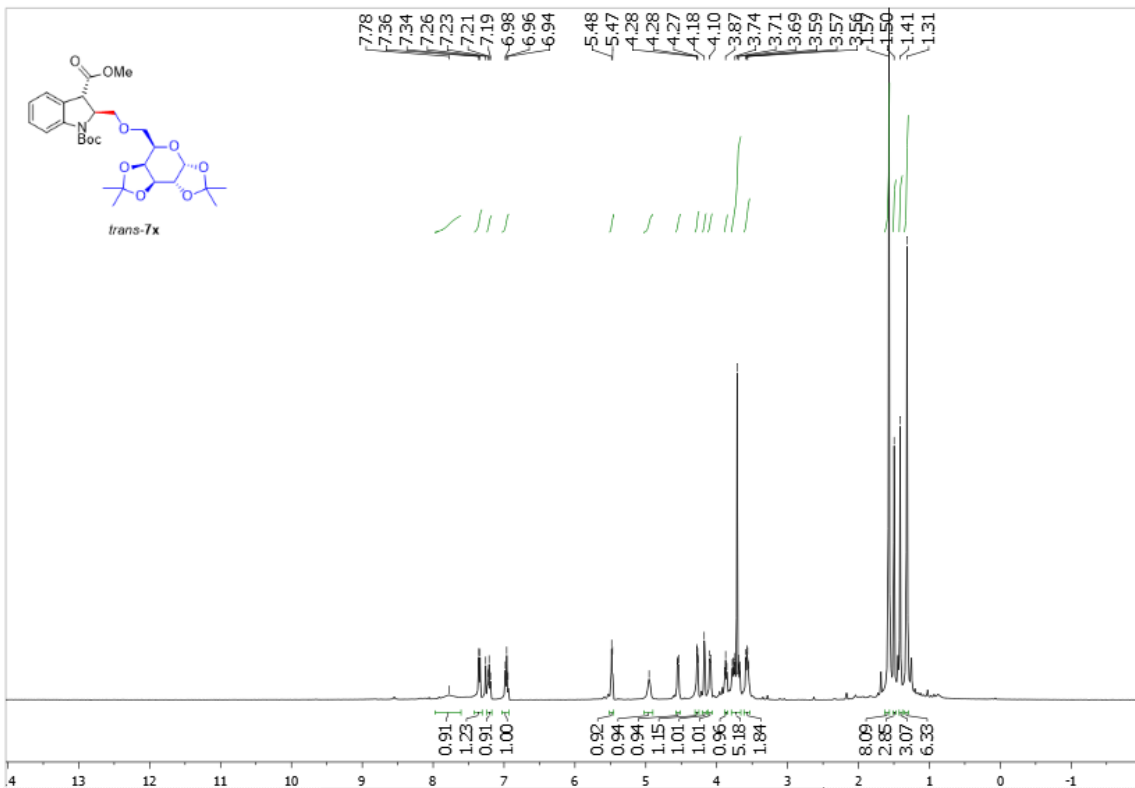

Supplementary Figure 176. <sup>1</sup>H NMR spectra of *trans-7x*

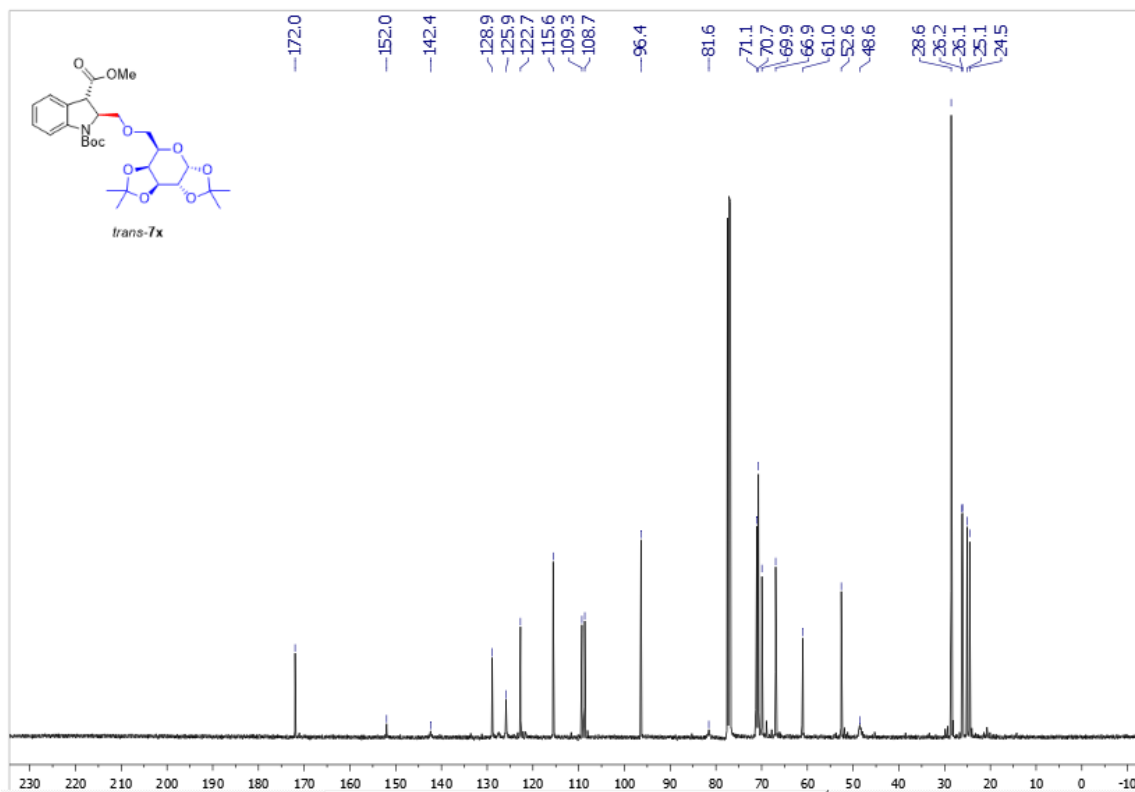

Supplementary Figure 177. <sup>13</sup>C NMR spectra of *trans-7x*

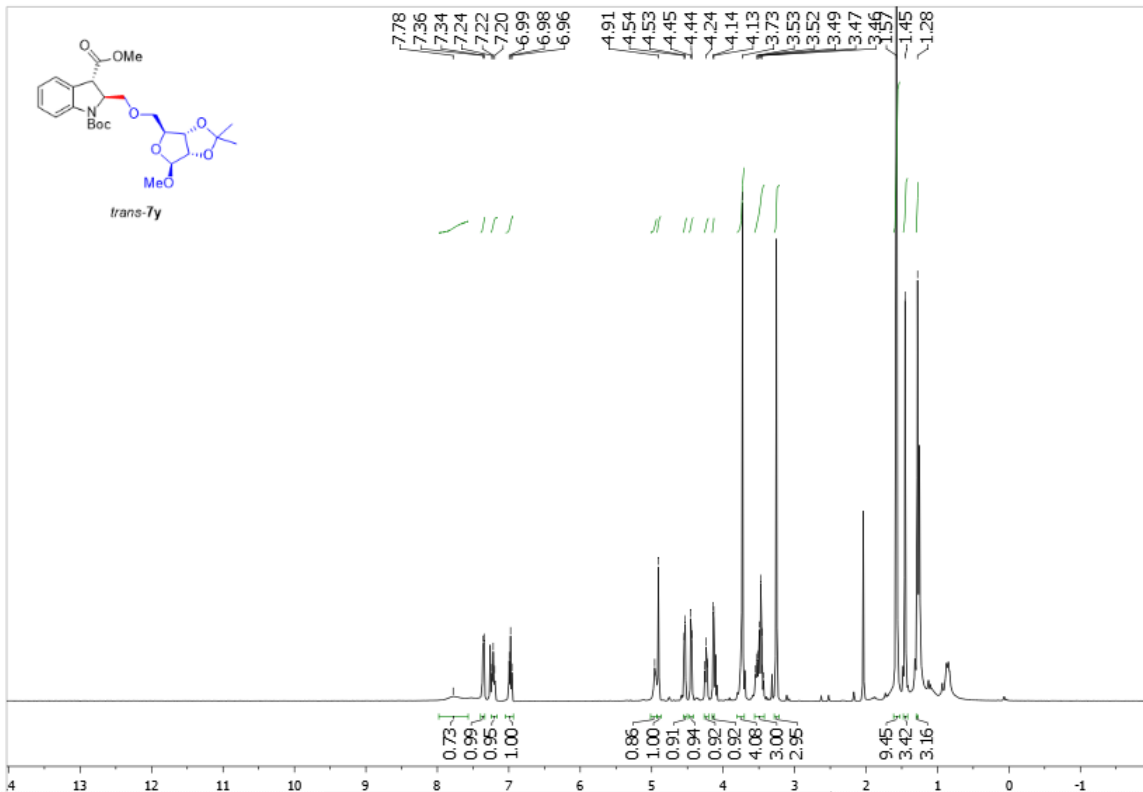

Supplementary Figure 178. <sup>1</sup>H NMR spectra of *trans*-7y

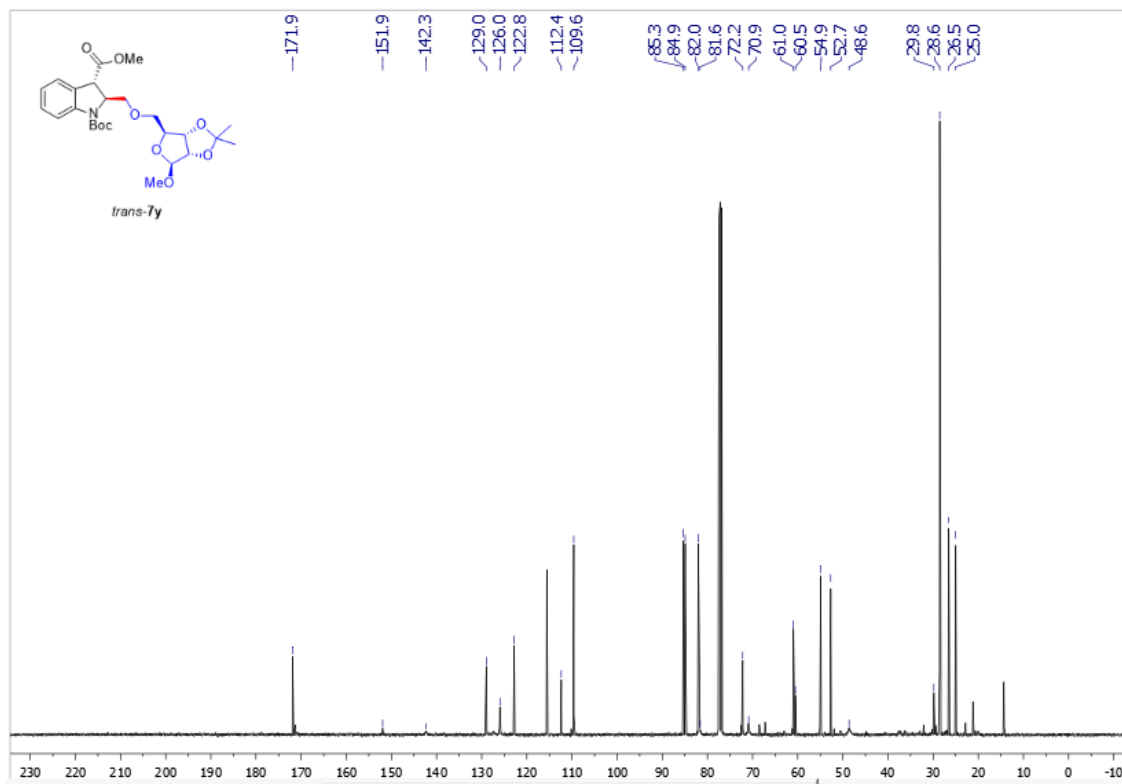

Supplementary Figure 179. <sup>13</sup>C NMR spectra of *trans*-7y

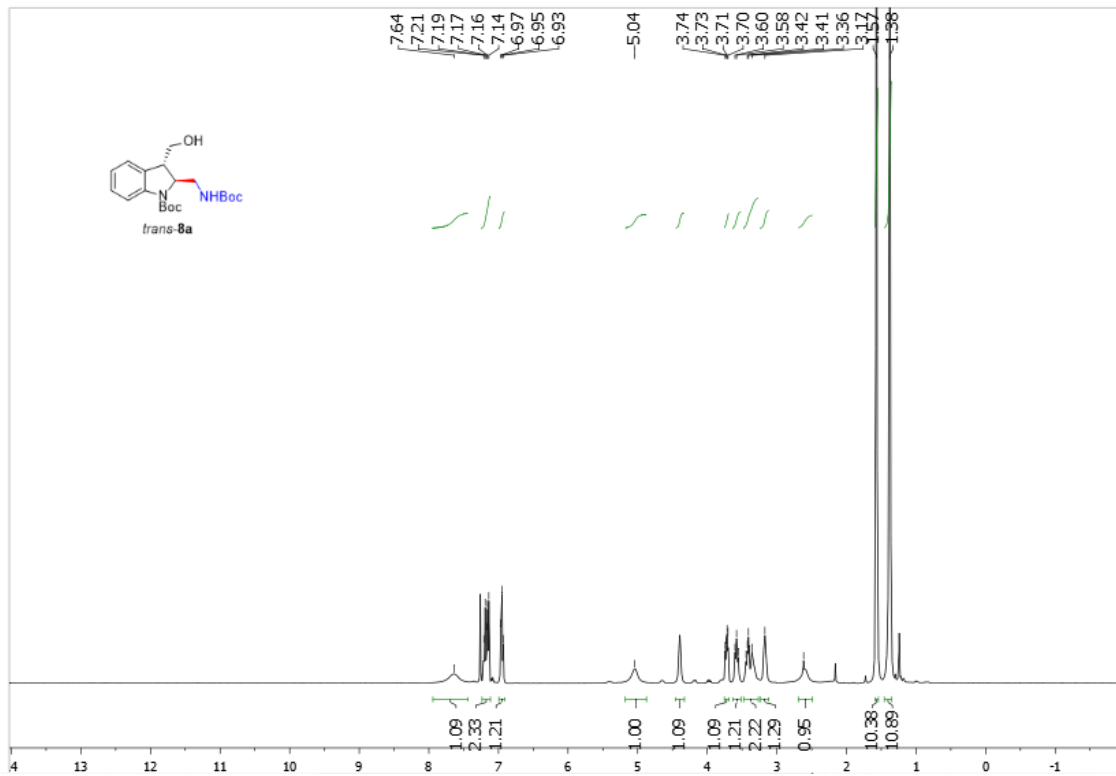

Supplementary Figure 181. <sup>1</sup>H NMR spectra of *trans*-8a

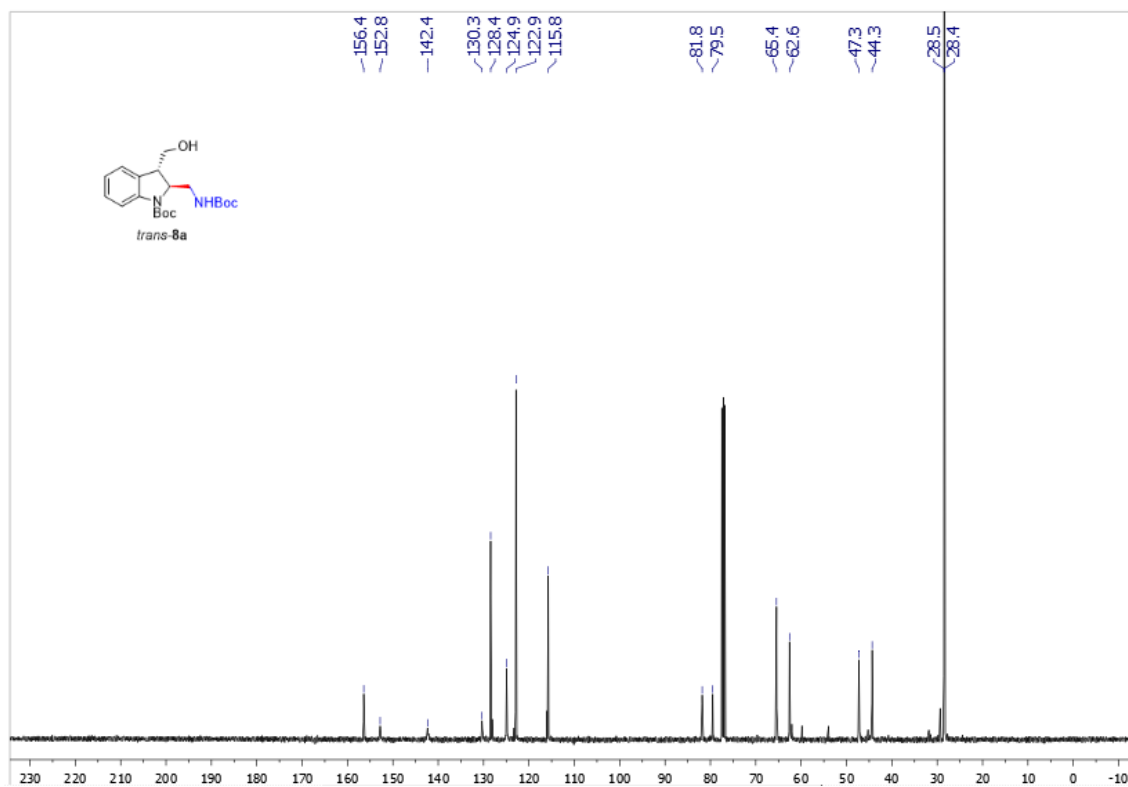

Supplementary Figure 182. <sup>13</sup>C NMR spectra of *trans*-8a

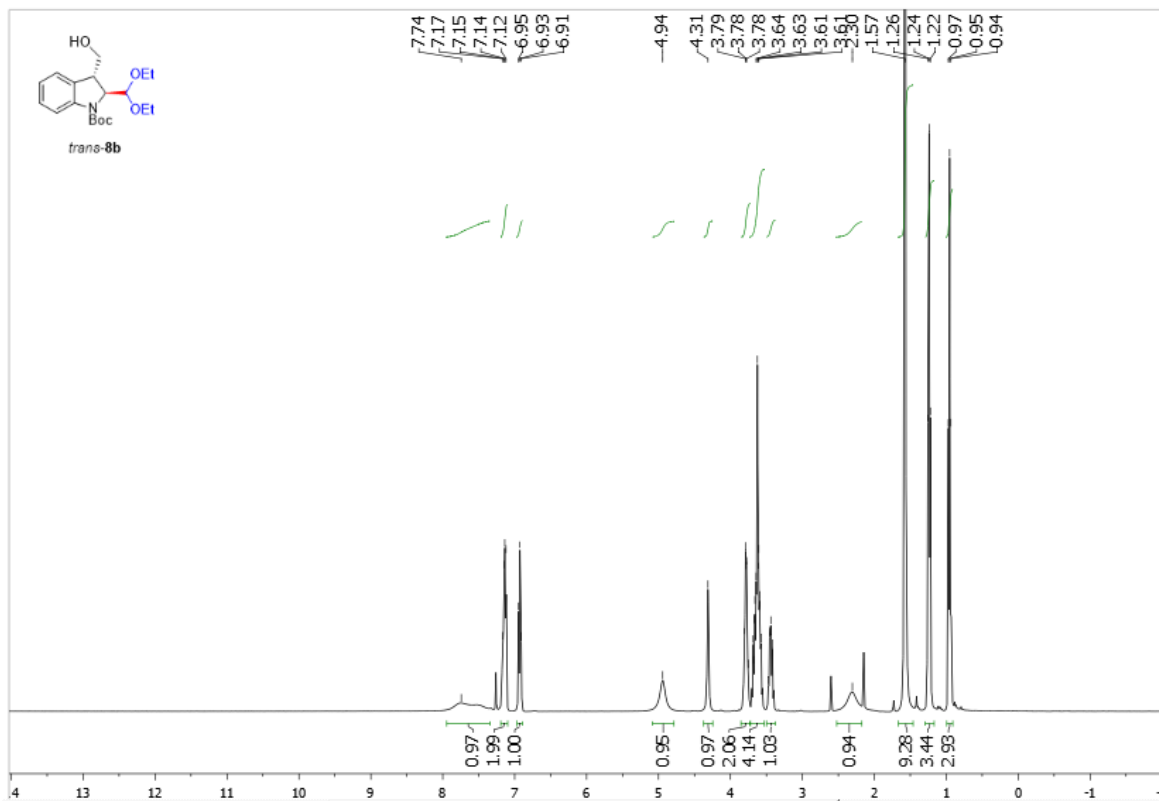

Supplementary Figure 183. <sup>1</sup>H NMR spectra of *trans-8b*

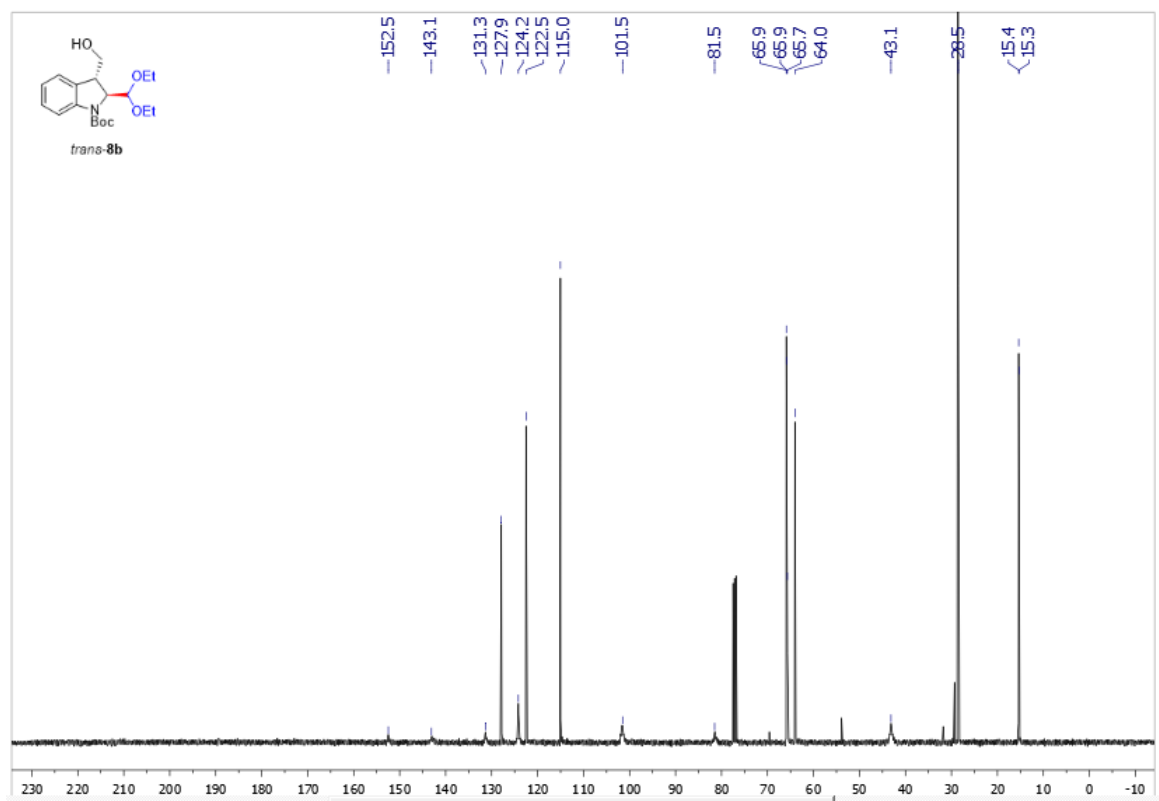

Supplementary Figure 184. <sup>13</sup>C NMR spectra of *trans-8b*

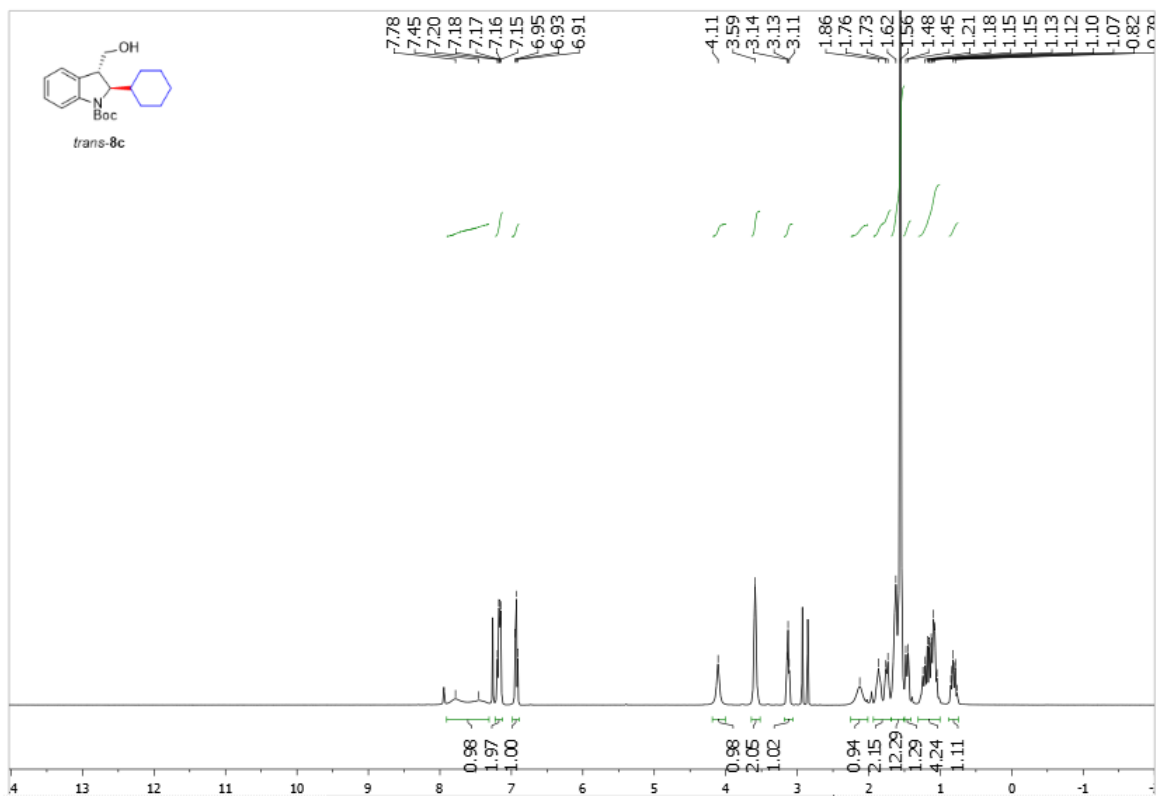

Supplementary Figure 185. <sup>1</sup>H NMR spectra of *trans-8c*

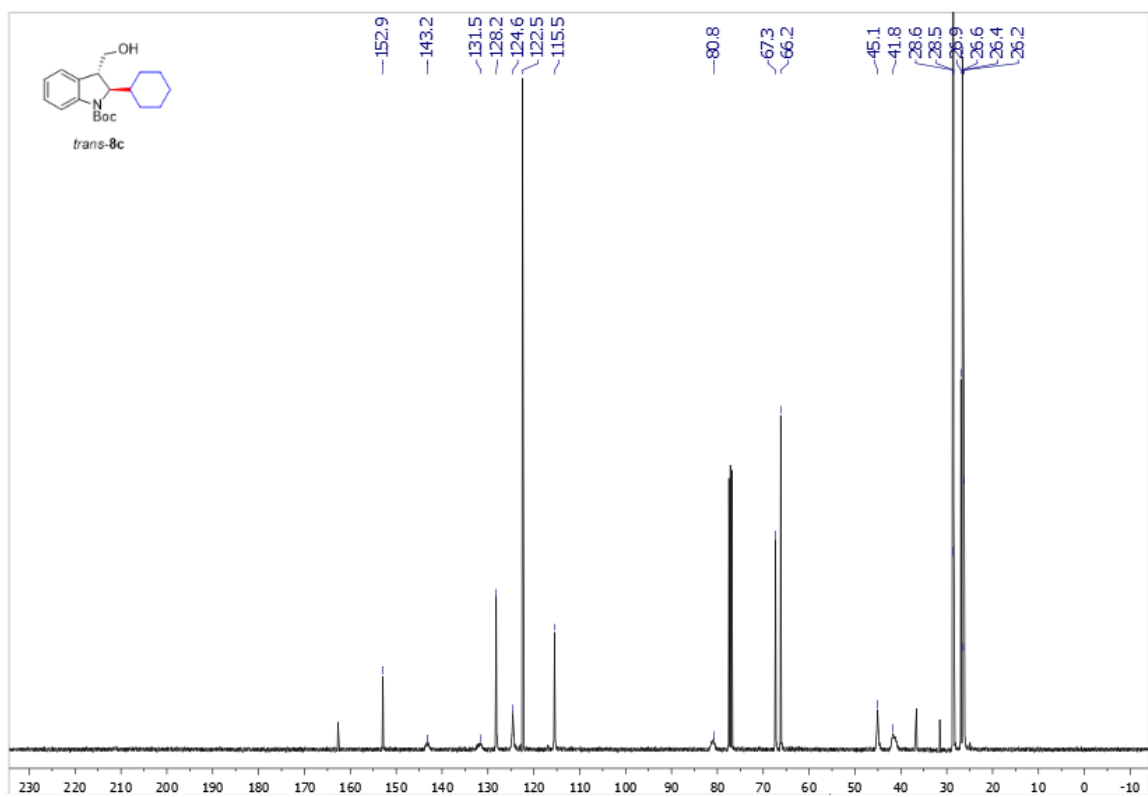

Supplementary Figure 186. <sup>13</sup>C NMR spectra of *trans-8c*

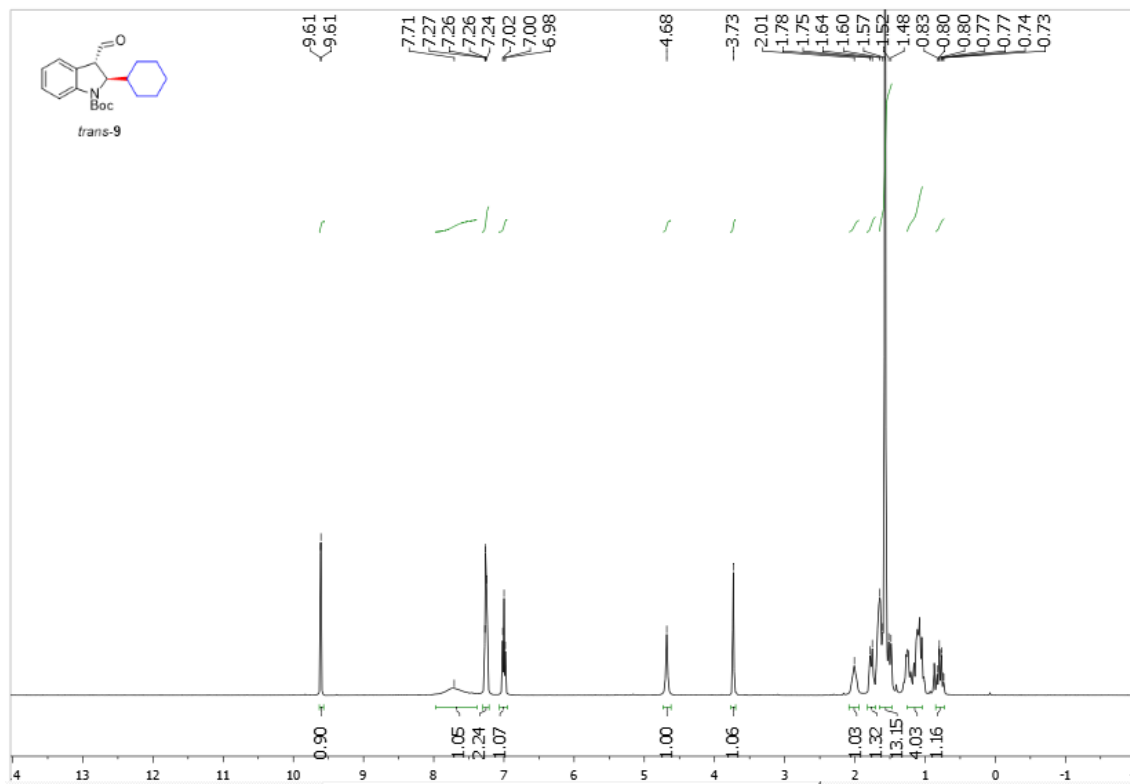

Supplementary Figure 187. <sup>1</sup>H NMR spectra of *trans-9*

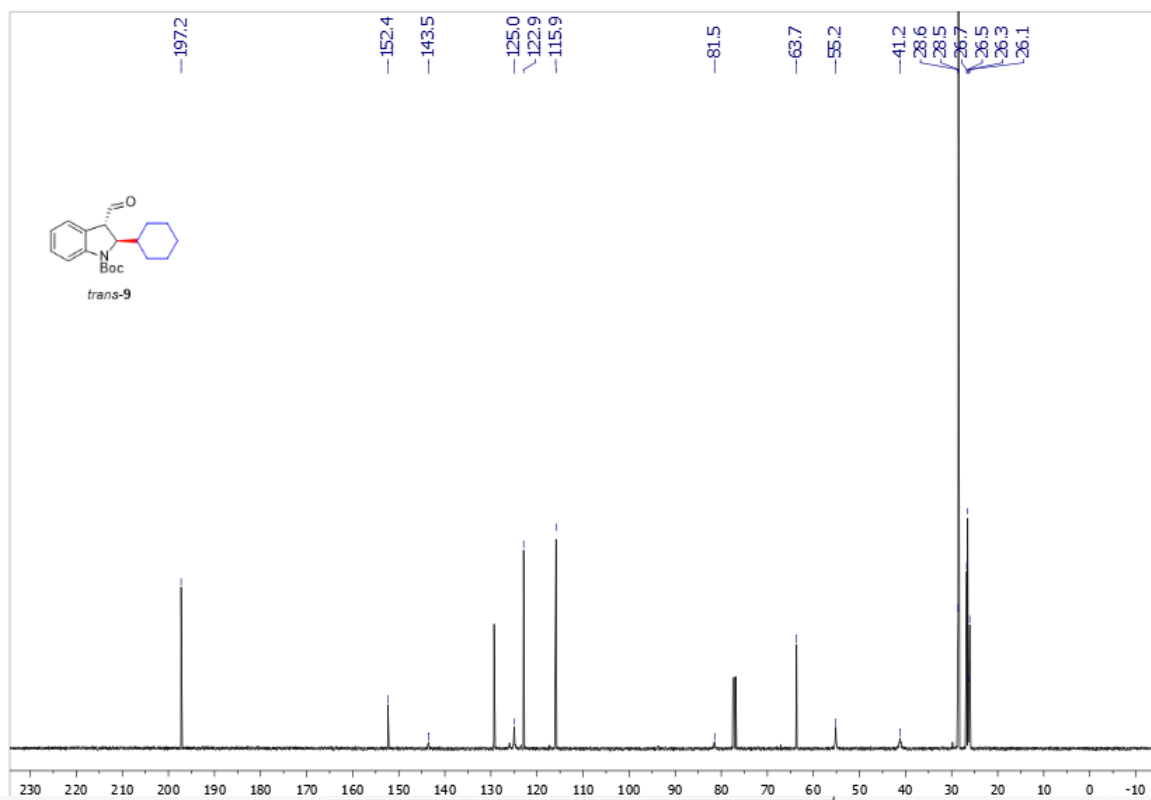

Supplementary Figure 188. <sup>13</sup>C NMR spectra of *trans-9*

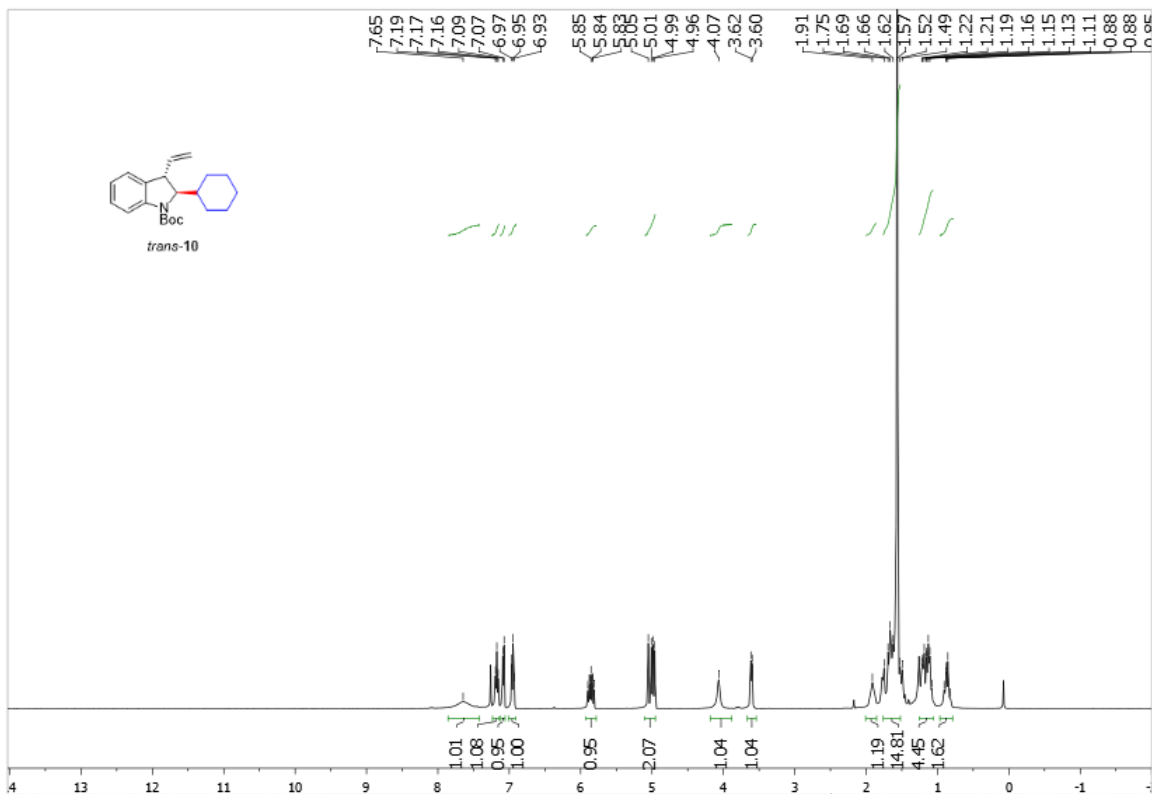

Supplementary Figure 189.  $^1\text{H}$  NMR spectra of *trans*-10

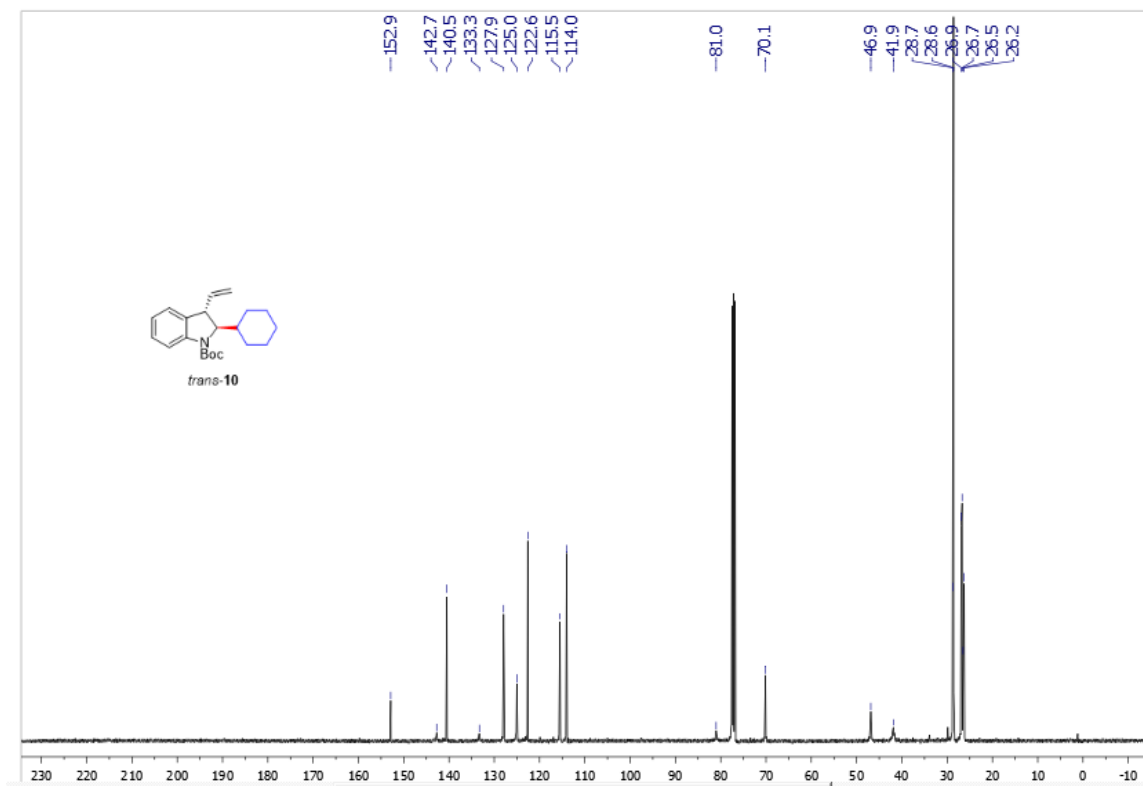

Supplementary Figure 190.  $^{13}\text{C}$  NMR spectra of *trans*-10



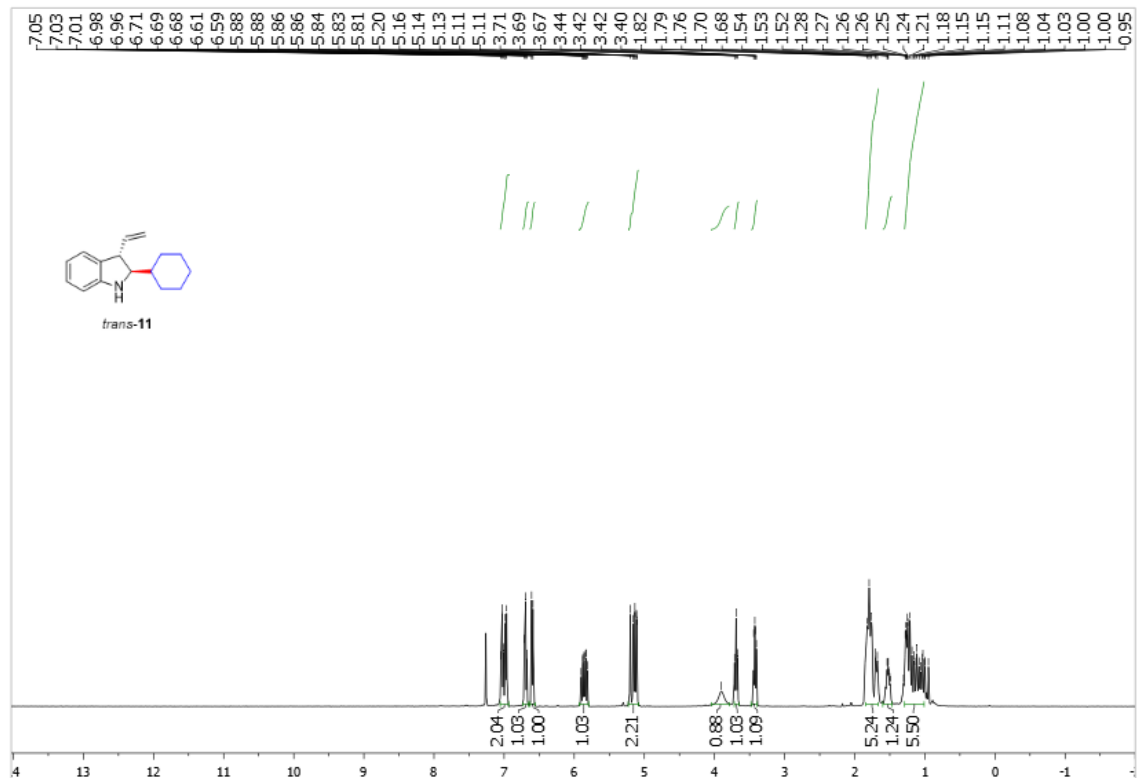

Supplementary Figure 191. <sup>1</sup>H NMR spectra of *trans*-11

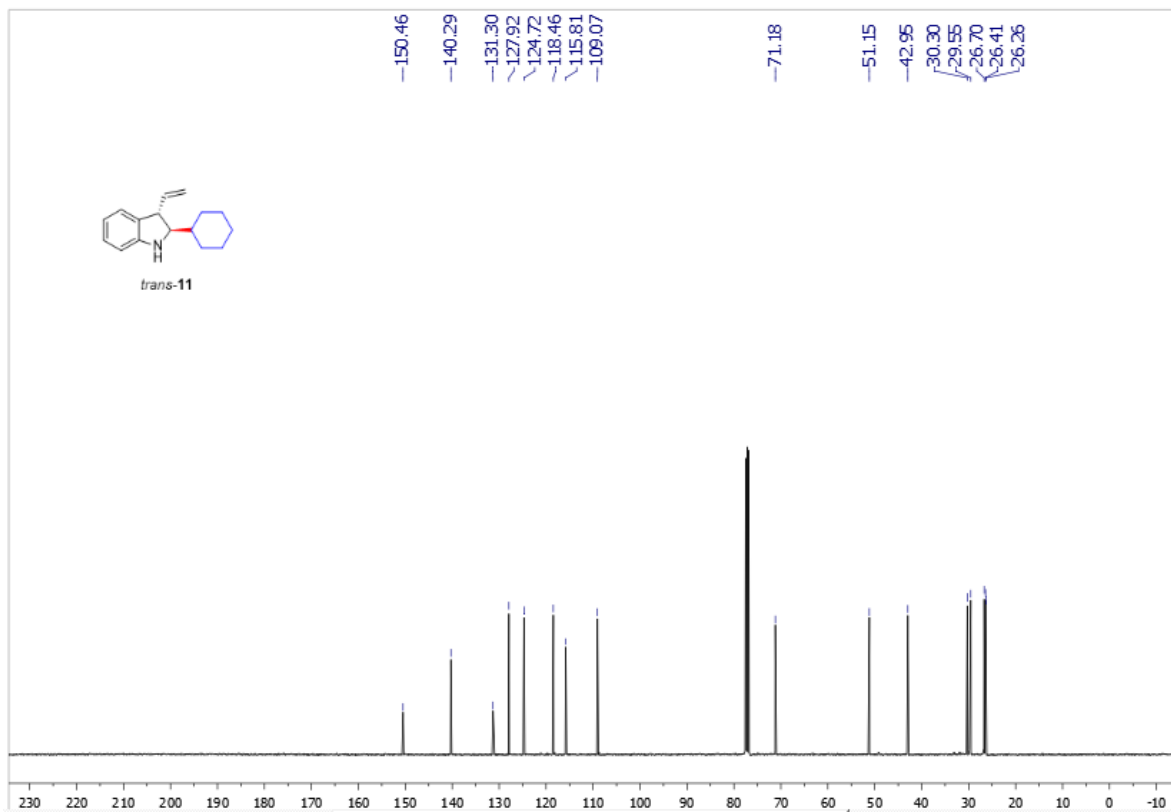

Supplementary Figure 192. <sup>13</sup>C NMR spectra of *trans*-11
