# Supplementary material for: Organophotocatalytic dearomatization of indoles, pyrroles and benzo(thio)furans via a Giese-type transformation
Source: PubMed Central journal article supplement (PMC9814947; doi:10.1038/s42004-021-00460-y), 2021-02-19
Supplement: 42004_2021_460_MOESM5_ESM.pdf [file 42004_2021_460_MOESM5_ESM.pdf]

## Supplementary Data 2: Chiral HPLC analysis spectra

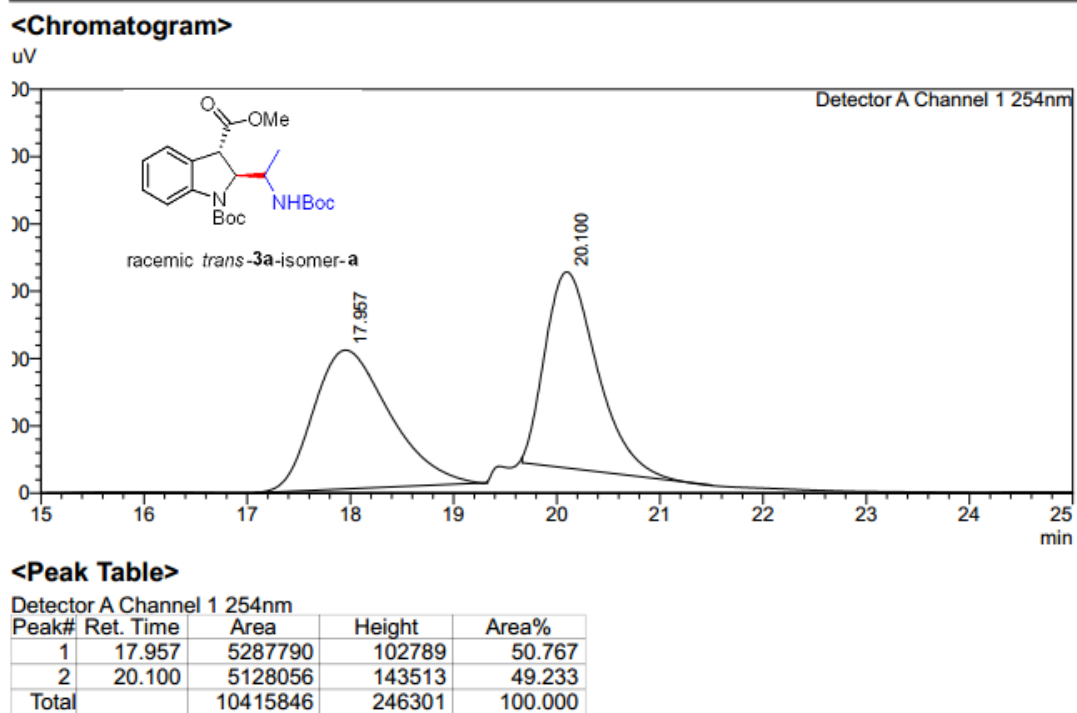

Supplementary Figure 193. HPLC spectra of racemic *trans*-**3a**-isomer-**a**

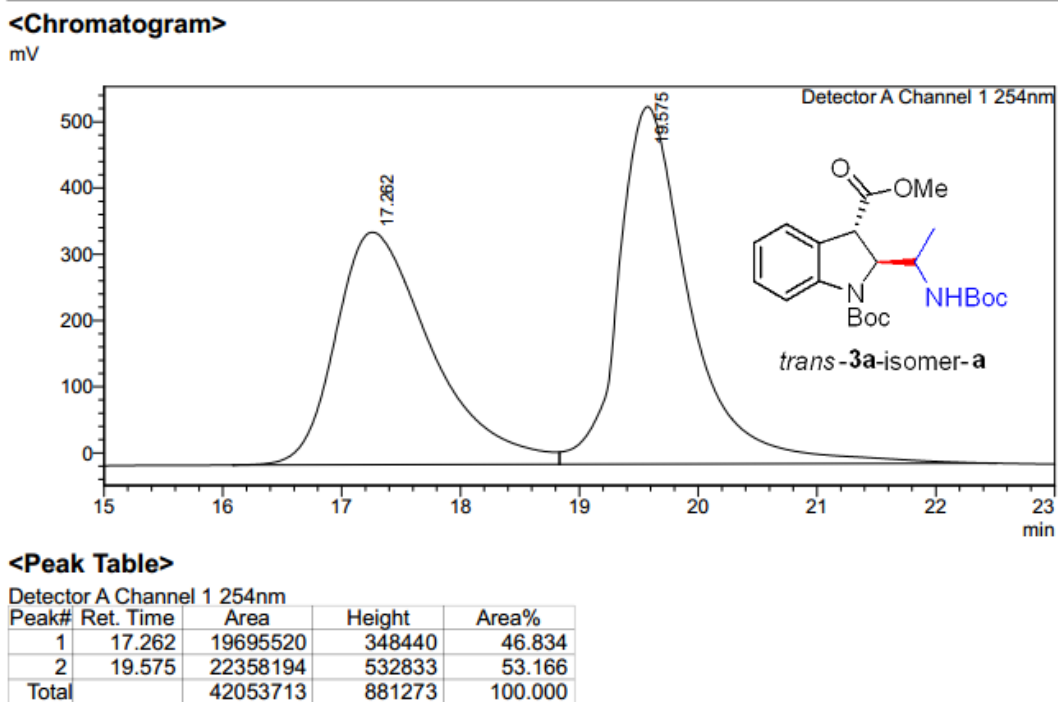

Supplementary Figure 194. HPLC spectra of *trans*-**3a**-isomer-**a**

<Chromatogram>

mV

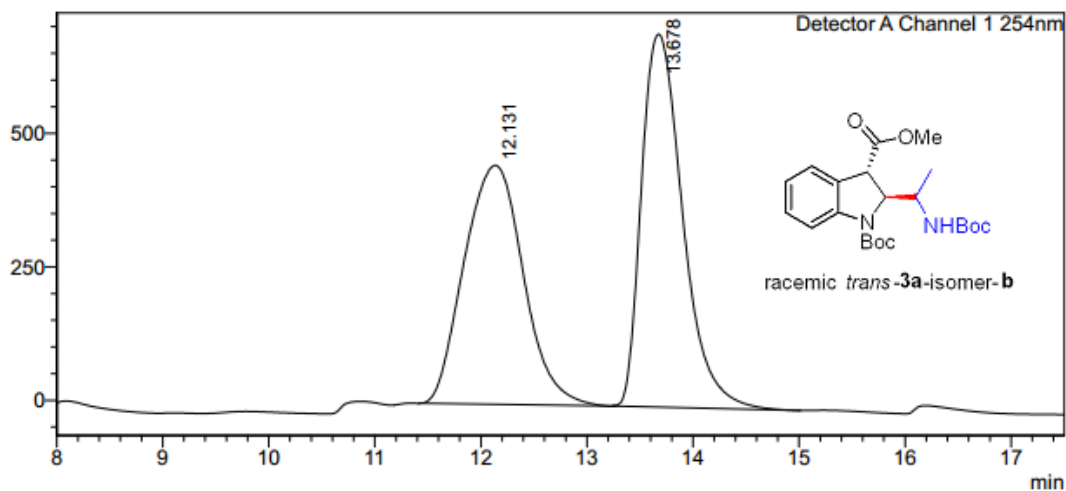

<Peak Table>

Detector A Channel 1 254nm

| Peak# | Ret. Time | Area     | Height  | Area%   |
|-------|-----------|----------|---------|---------|
| 1     | 12.131    | 17406072 | 445944  | 47.959  |
| 2     | 13.678    | 18887221 | 681628  | 52.041  |
| Total |           | 36293293 | 1127571 | 100.000 |

Supplementary Figure 195. HPLC spectra of racemic *trans*-**3a**-isomer-**b**

<Chromatogram>

mV

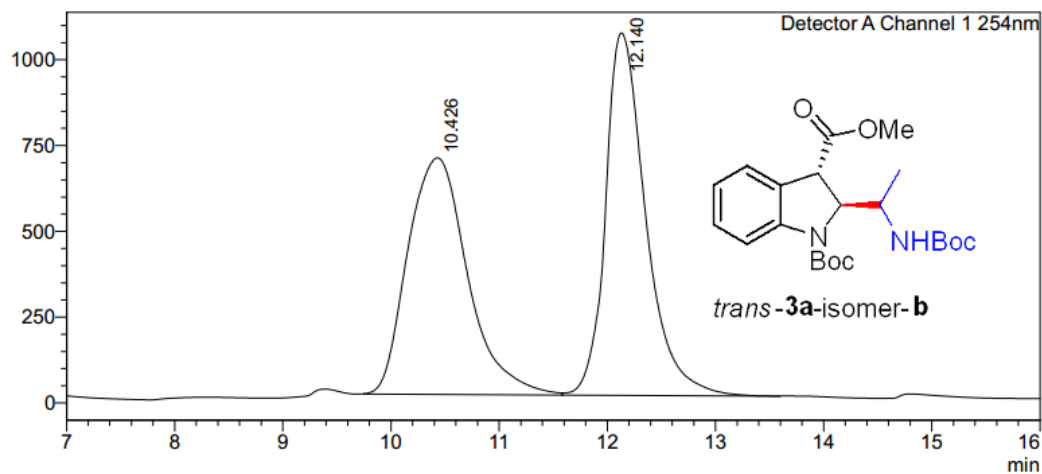

<Peak Table>

Detector A Channel 1 254nm

| Peak# | Ret. Time | Area     | Height  | Area%   |
|-------|-----------|----------|---------|---------|
| 1     | 10.426    | 26548069 | 679539  | 49.320  |
| 2     | 12.140    | 27279925 | 1045145 | 50.680  |
| Total |           | 53827994 | 1724684 | 100.000 |

Supplementary Figure 196. HPLC spectra of racemic **3a**-isomer-**b**

### <Chromatogram>

mV

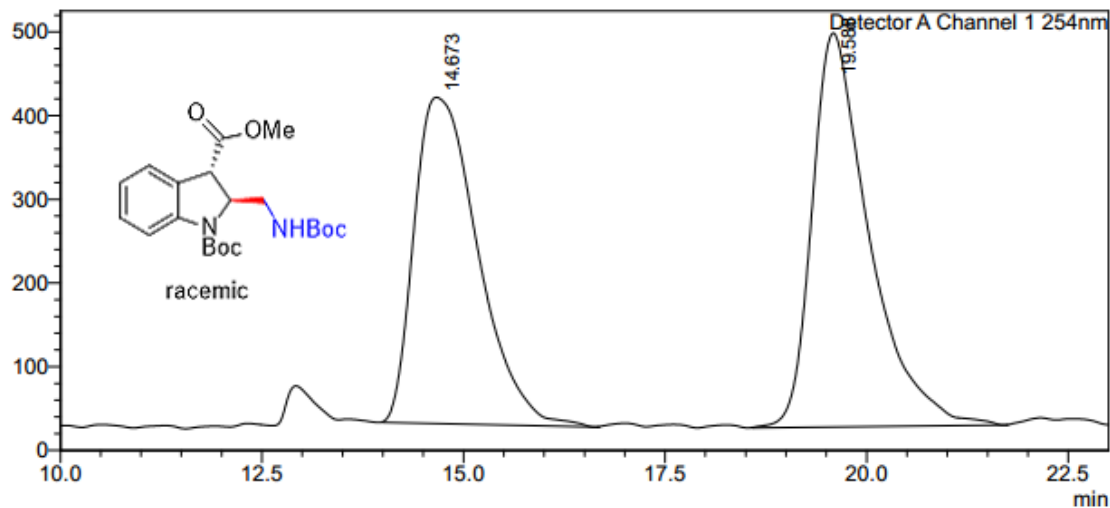

### <Peak Table>

Detector A Channel 1 254nm

| Peak# | Ret. Time | Area     | Height | Area%   |
|-------|-----------|----------|--------|---------|
| 1     | 14.673    | 21488810 | 387521 | 48.055  |
| 2     | 19.588    | 23228312 | 463405 | 51.945  |
| Total |           | 44717122 | 850926 | 100.000 |

Supplementary Figure 197. HPLC spectra of racemic *trans*-7a

### <Chromatogram>

mV

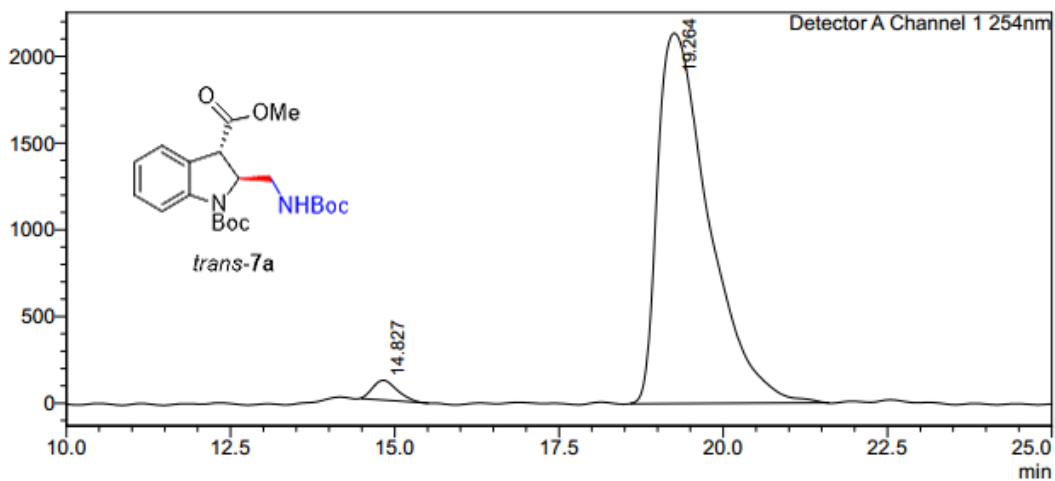

### <Peak Table>

Detector A Channel 1 254nm

| Peak# | Ret. Time | Area      | Height  | Area%   |
|-------|-----------|-----------|---------|---------|
| 1     | 14.827    | 2928796   | 110173  | 2.463   |
| 2     | 19.264    | 116005881 | 2129423 | 97.537  |
| Total |           | 118934677 | 2239595 | 100.000 |

Supplementary Figure 198. HPLC spectra of *trans*-7a

### <Chromatogram>

mV

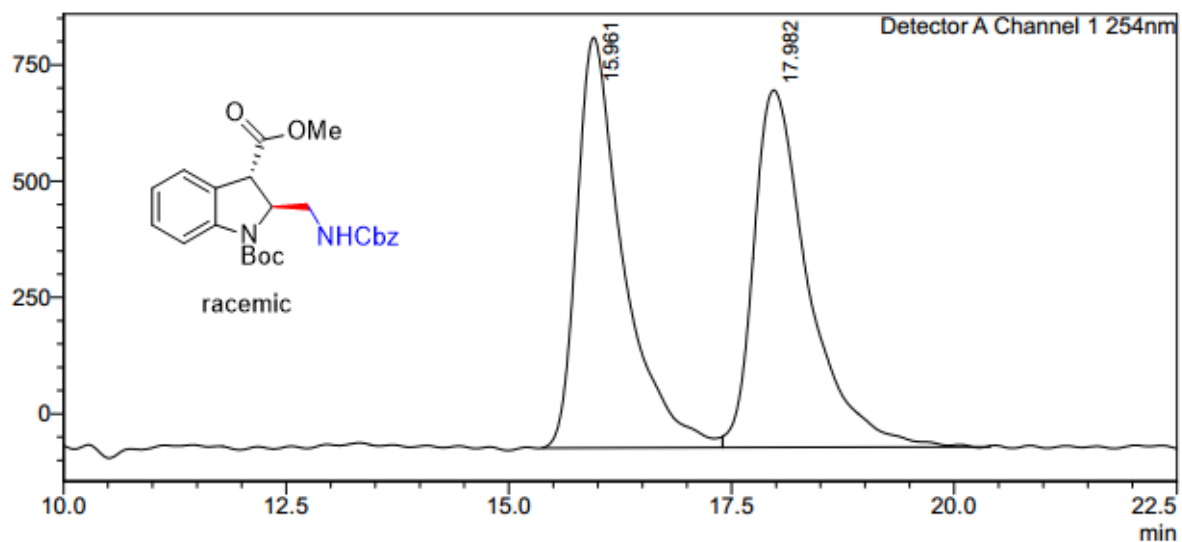

### <Peak Table>

Detector A Channel 1 254nm

| Peak# | Ret. Time | Area     | Height  | Area%   |
|-------|-----------|----------|---------|---------|
| 1     | 15.961    | 31946494 | 871941  | 49.303  |
| 2     | 17.982    | 32849795 | 759948  | 50.697  |
| Total |           | 64796290 | 1631889 | 100.000 |

Supplementary Figure 199. HPLC spectra of racemic *trans*-7b

### <Chromatogram>

mV

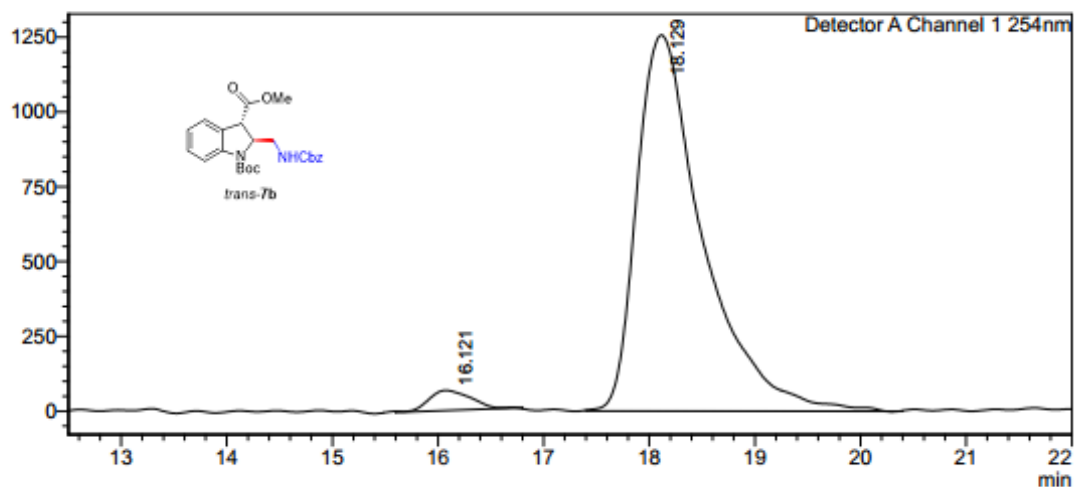

### <Peak Table>

Detector A Channel 1 254nm

| Peak# | Ret. Time | Area     | Height  | Area%   |
|-------|-----------|----------|---------|---------|
| 1     | 16.121    | 1865735  | 63533   | 3.304   |
| 2     | 18.129    | 54600773 | 1224043 | 96.696  |
| Total |           | 56466508 | 1287575 | 100.000 |

Supplementary Figure 200. HPLC spectra of *trans*-7b

### <Chromatogram>

mV

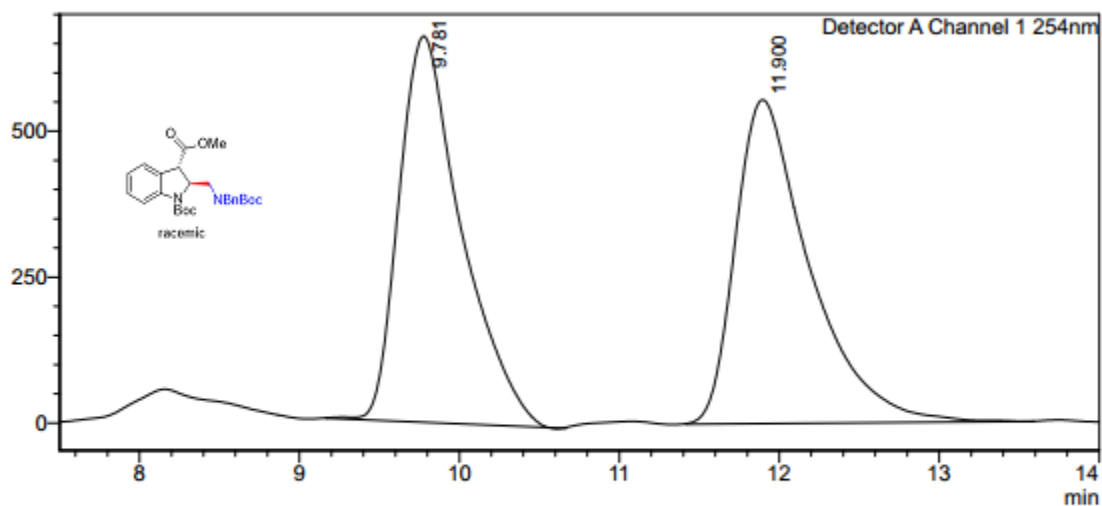

### <Peak Table>

Detector A Channel 1 254nm

| Peak# | Ret. Time | Area     | Height  | Area%   |
|-------|-----------|----------|---------|---------|
| 1     | 9.781     | 18038085 | 649522  | 50.166  |
| 2     | 11.900    | 17918945 | 547275  | 49.834  |
| Total |           | 35957030 | 1196797 | 100.000 |

Supplementary Figure 201. HPLC spectra of racemic *trans*-7c

### <Chromatogram>

mV

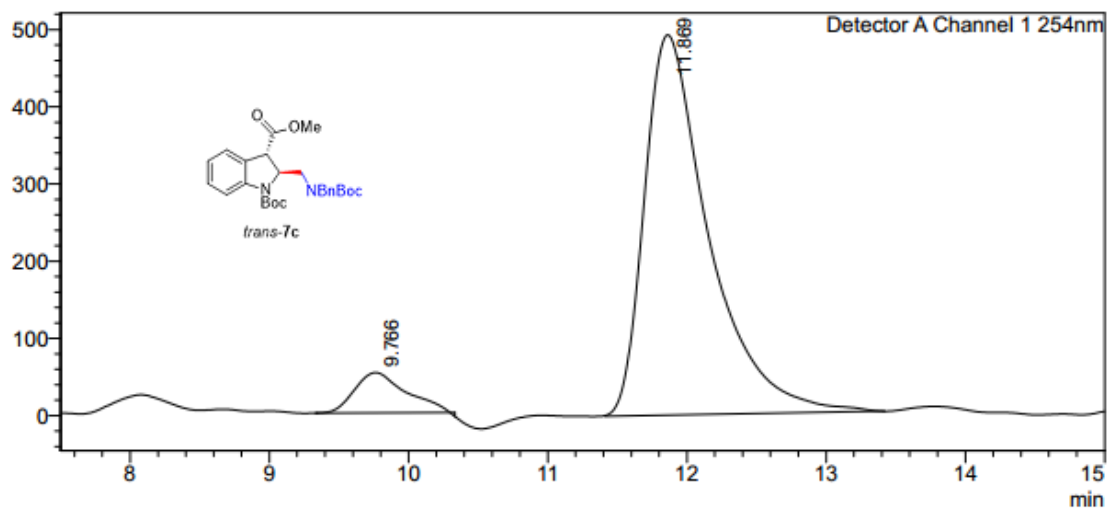

### <Peak Table>

Detector A Channel 1 254nm

| Peak# | Ret. Time | Area     | Height | Area%   |
|-------|-----------|----------|--------|---------|
| 1     | 9.766     | 1348248  | 50283  | 7.857   |
| 2     | 11.869    | 15812498 | 486368 | 92.143  |
| Total |           | 17160746 | 536652 | 100.000 |

Supplementary Figure 202. HPLC spectra of *trans*-7c

<Chromatogram>

mV

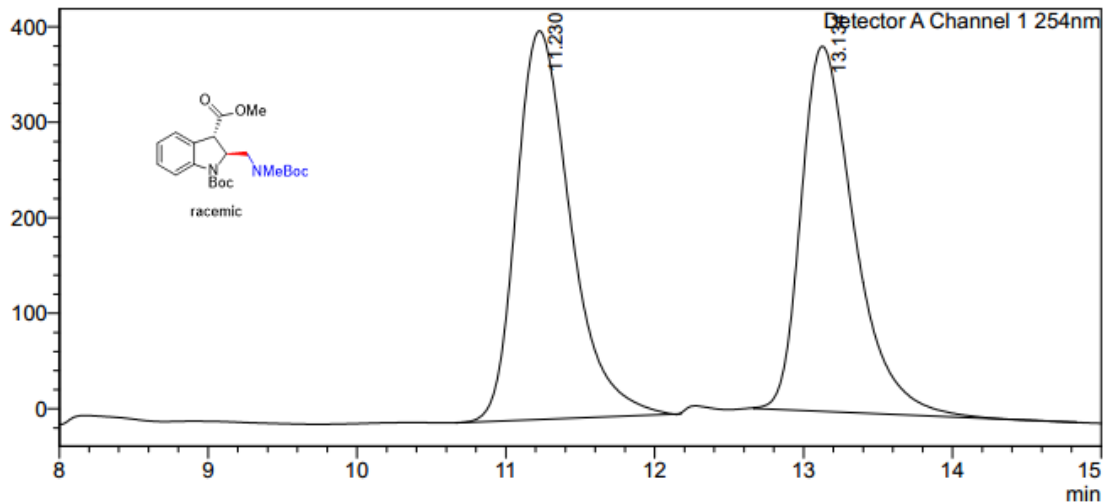

<Peak Table>

Detector A Channel 1 254nm

| Peak# | Ret. Time | Area     | Height | Area%   |
|-------|-----------|----------|--------|---------|
| 1     | 11.230    | 10315193 | 401110 | 51.952  |
| 2     | 13.134    | 9540075  | 377865 | 48.048  |
| Total |           | 19855268 | 778975 | 100.000 |

Supplementary Figure 203. HPLC spectra of racemic *trans*-7d

<Chromatogram>

mV

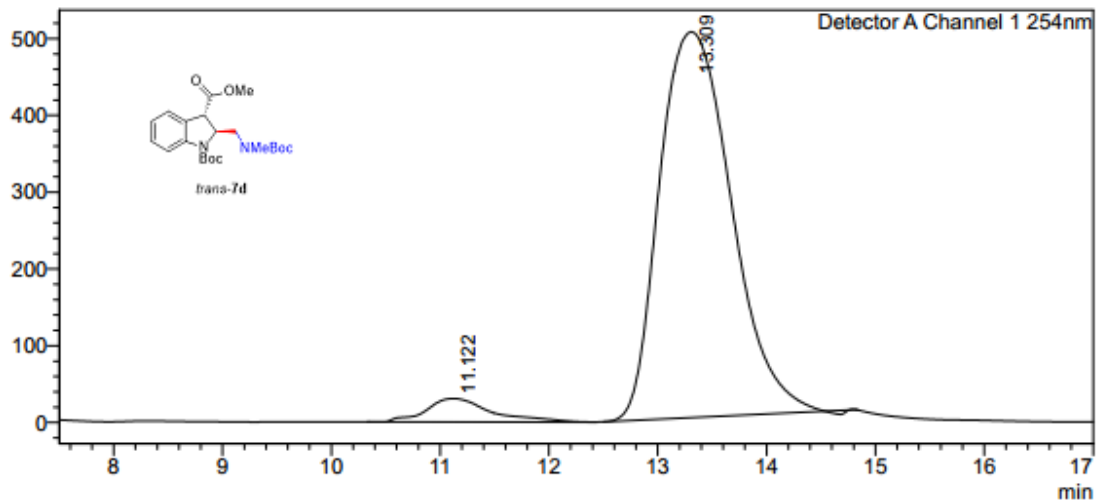

<Peak Table>

Detector A Channel 1 254nm

| Peak# | Ret. Time | Area     | Height | Area%   |
|-------|-----------|----------|--------|---------|
| 1     | 11.122    | 1275421  | 30357  | 5.229   |
| 2     | 13.309    | 23114092 | 501035 | 94.771  |
| Total |           | 24389513 | 531392 | 100.000 |

Supplementary Figure 204. HPLC spectra of *trans*-7d

### <Chromatogram>

mV

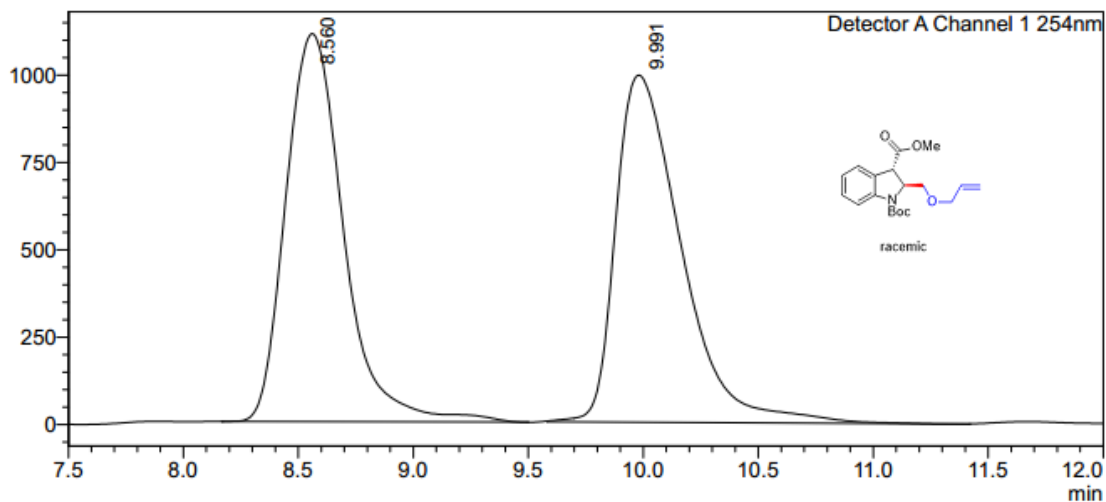

### <Peak Table>

Detector A Channel 1 254nm

| Peak# | Ret. Time | Area     | Height  | Area%   |
|-------|-----------|----------|---------|---------|
| 1     | 8.560     | 19407729 | 1077762 | 49.590  |
| 2     | 9.991     | 19728560 | 959907  | 50.410  |
| Total |           | 39136289 | 2037669 | 100.000 |

Supplementary Figure 205. HPLC spectra of racemic *trans*-7e

### <Chromatogram>

mV

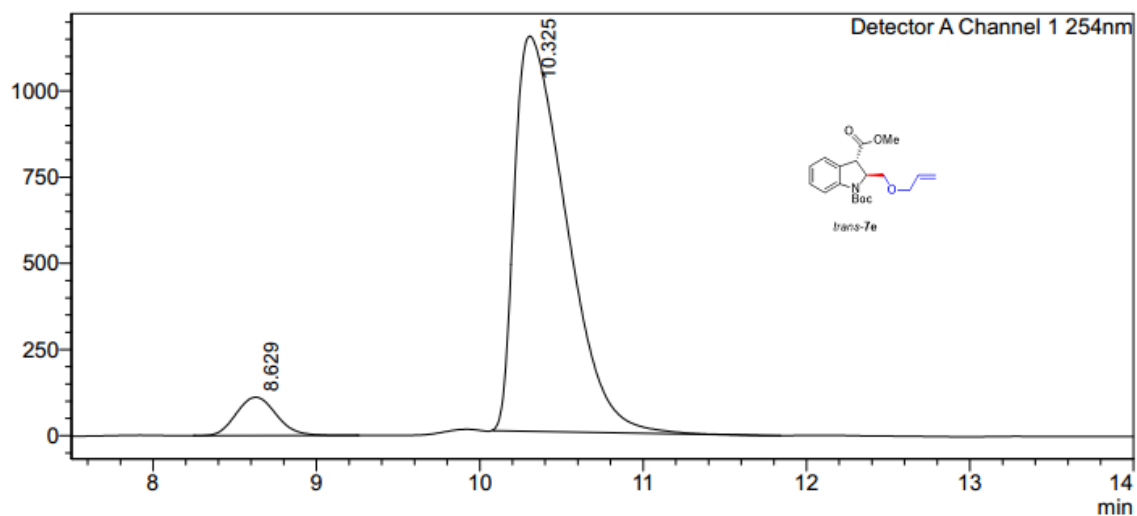

### <Peak Table>

Detector A Channel 1 254nm

| Peak# | Ret. Time | Area     | Height  | Area%   |
|-------|-----------|----------|---------|---------|
| 1     | 8.629     | 1905194  | 109075  | 7.027   |
| 2     | 10.325    | 25207613 | 1123285 | 92.973  |
| Total |           | 27112807 | 1232360 | 100.000 |

Supplementary Figure 206. HPLC spectra of *trans*-7e

<Chromatogram>

mV

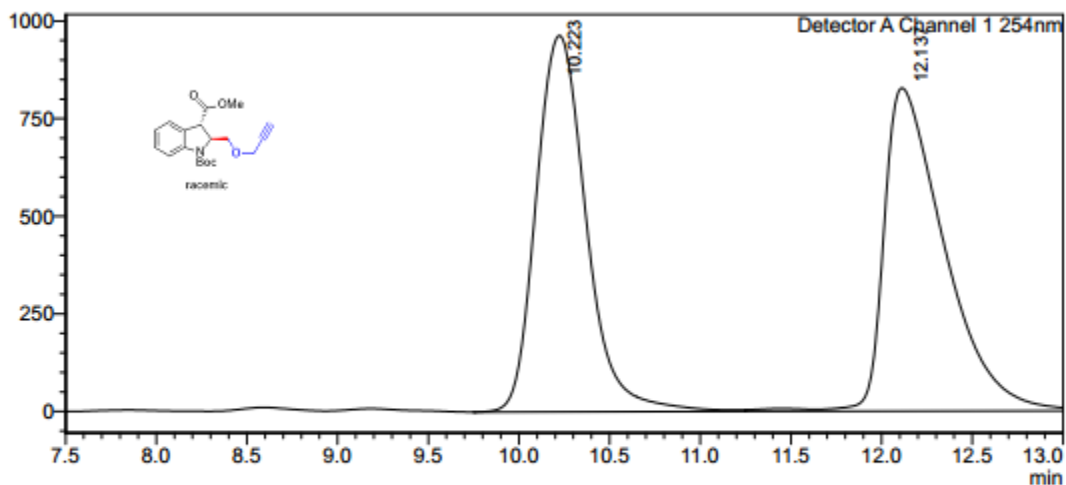

<Peak Table>

Detector A Channel 1 254nm

| Peak# | Ret. Time | Area     | Height  | Area%   |
|-------|-----------|----------|---------|---------|
| 1     | 10.223    | 18571451 | 944779  | 48.982  |
| 2     | 12.137    | 19343206 | 812563  | 51.018  |
| Total |           | 37914657 | 1757342 | 100.000 |

Supplementary Figure 207. HPLC spectra of racemic *trans*-7f

<Chromatogram>

mV

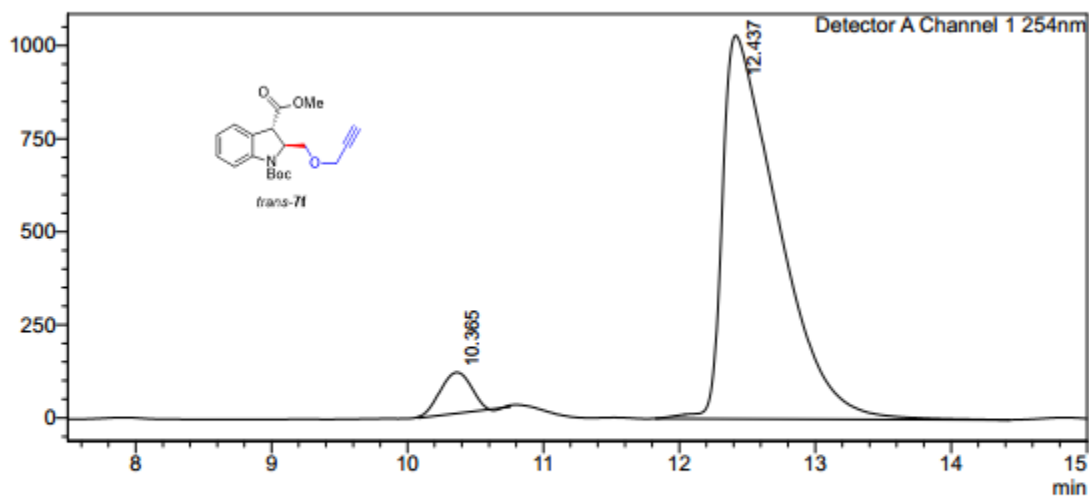

<Peak Table>

Detector A Channel 1 254nm

| Peak# | Ret. Time | Area     | Height  | Area%   |
|-------|-----------|----------|---------|---------|
| 1     | 10.365    | 1772466  | 106857  | 5.707   |
| 2     | 12.437    | 29287036 | 988206  | 94.293  |
| Total |           | 31059503 | 1095064 | 100.000 |

Supplementary Figure 208. HPLC spectra of *trans*-7f



### <Chromatogram>

mV

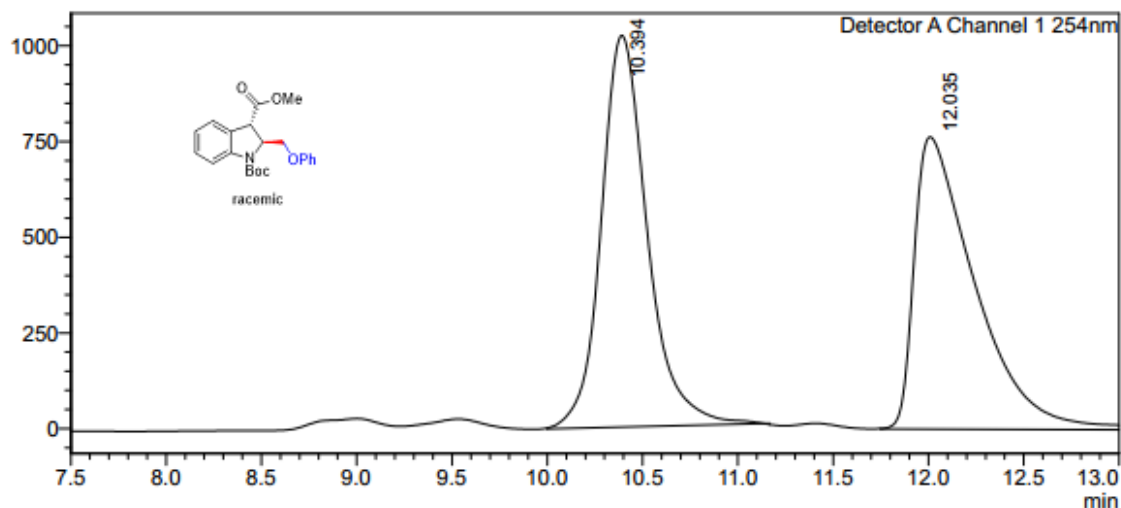

### <Peak Table>

Detector A Channel 1 254nm

| Peak# | Ret. Time | Area     | Height  | Area%   |
|-------|-----------|----------|---------|---------|
| 1     | 10.394    | 17197238 | 988269  | 50.225  |
| 2     | 12.035    | 17043152 | 729055  | 49.775  |
| Total |           | 34240390 | 1717324 | 100.000 |

Supplementary Figure 209. HPLC spectra of racemic *trans*-7g

### <Chromatogram>

mV

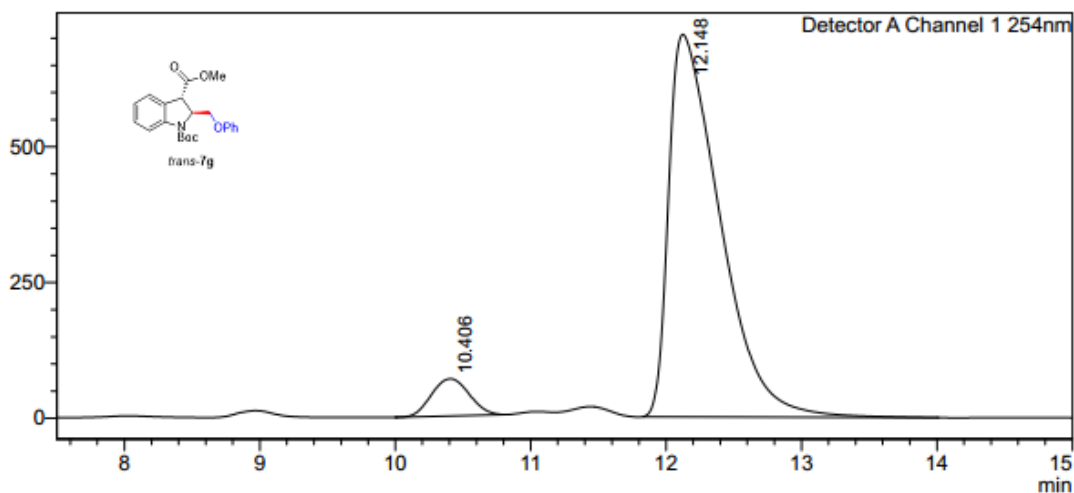

### <Peak Table>

Detector A Channel 1 254nm

| Peak# | Ret. Time | Area     | Height | Area%   |
|-------|-----------|----------|--------|---------|
| 1     | 10.406    | 1328469  | 66161  | 6.666   |
| 2     | 12.148    | 18600313 | 696522 | 93.334  |
| Total |           | 19928782 | 762683 | 100.000 |

Supplementary Figure 210. HPLC spectra of *trans*-7g

### <Chromatogram>

mV

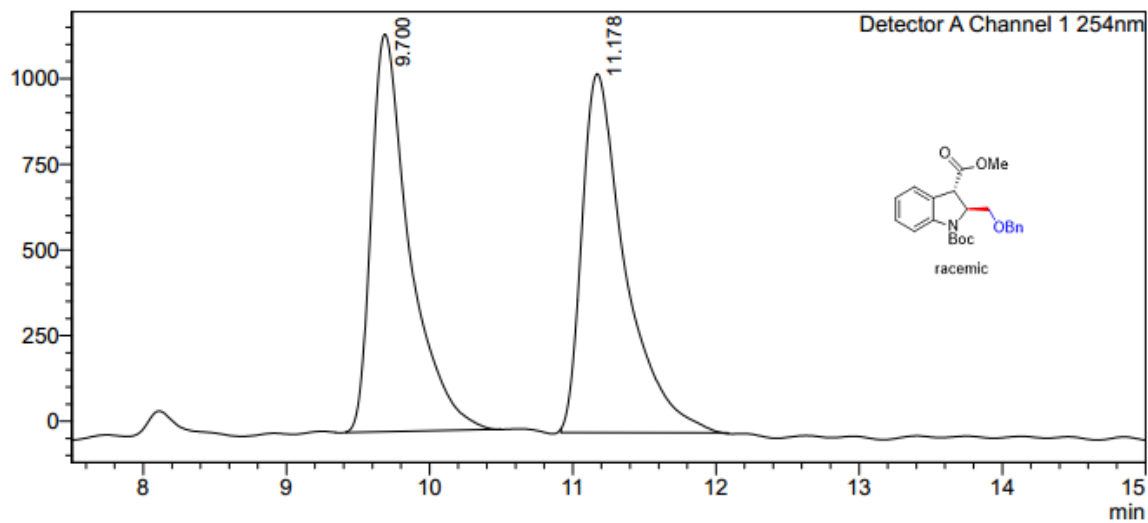

### <Peak Table>

Detector A Channel 1 254nm

| Peak# | Ret. Time | Area     | Height  | Area%   |
|-------|-----------|----------|---------|---------|
| 1     | 9.700     | 21565307 | 1107972 | 49.465  |
| 2     | 11.178    | 22031937 | 978133  | 50.535  |
| Total |           | 43597244 | 2086105 | 100.000 |

Supplementary Figure 211. HPLC spectra of racemic *trans*-7h

### <Chromatogram>

mV

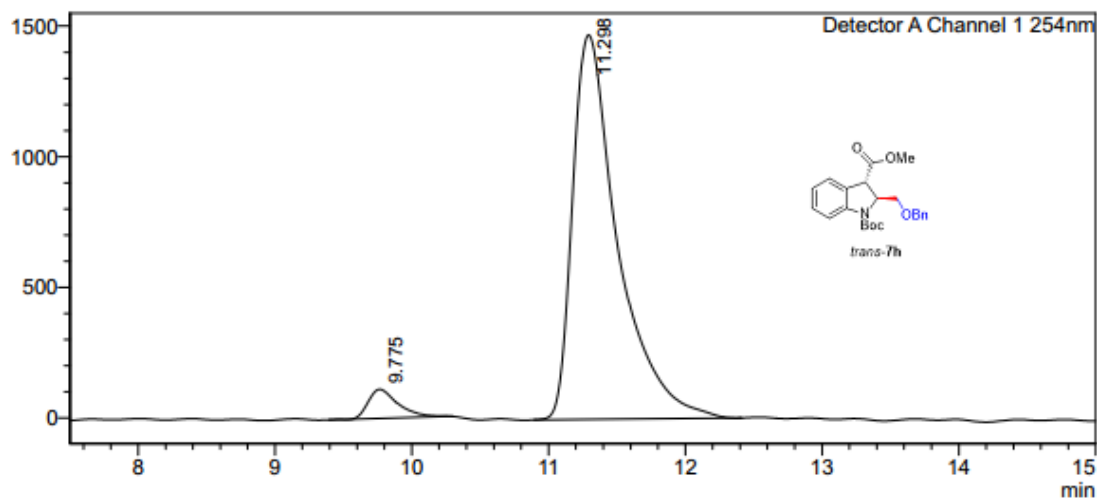

### <Peak Table>

Detector A Channel 1 254nm

| Peak# | Ret. Time | Area     | Height  | Area%   |
|-------|-----------|----------|---------|---------|
| 1     | 9.775     | 1686730  | 104177  | 4.764   |
| 2     | 11.298    | 33718380 | 1364912 | 95.236  |
| Total |           | 35405110 | 1469088 | 100.000 |

Supplementary Figure 212. HPLC spectra of *trans*-7h

### <Chromatogram>

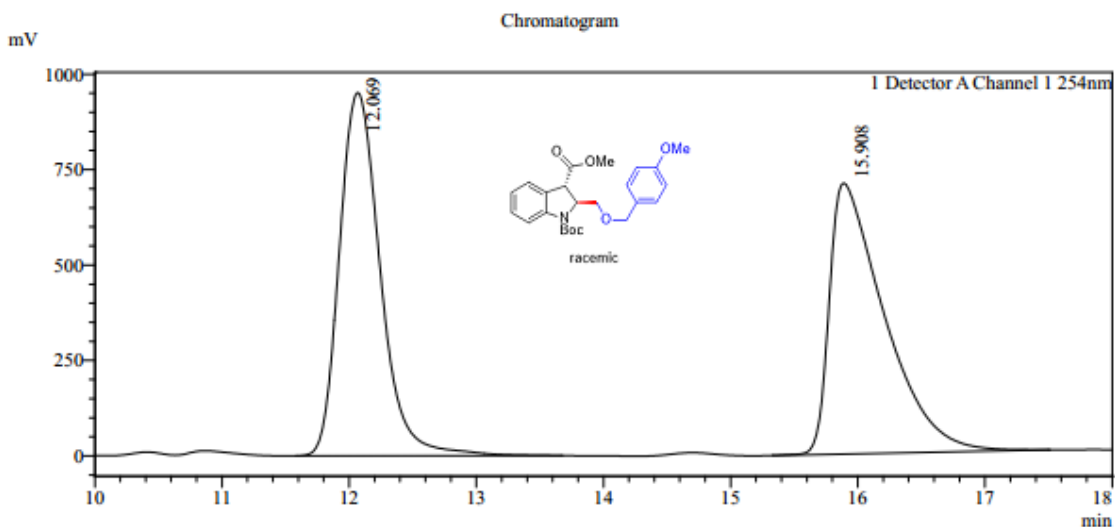

### <Peak Table>

Detector A Channel 1 254nm

| Peak# | Ret. Time | Area     | Height  | Area%   |
|-------|-----------|----------|---------|---------|
| 1     | 12.069    | 21255740 | 928156  | 49.906  |
| 2     | 15.908    | 21336176 | 697915  | 50.094  |
| Total |           | 42591916 | 1626070 | 100.000 |

Supplementary Figure 213. HPLC spectra of racemic *trans-7i*

### <Chromatogram>

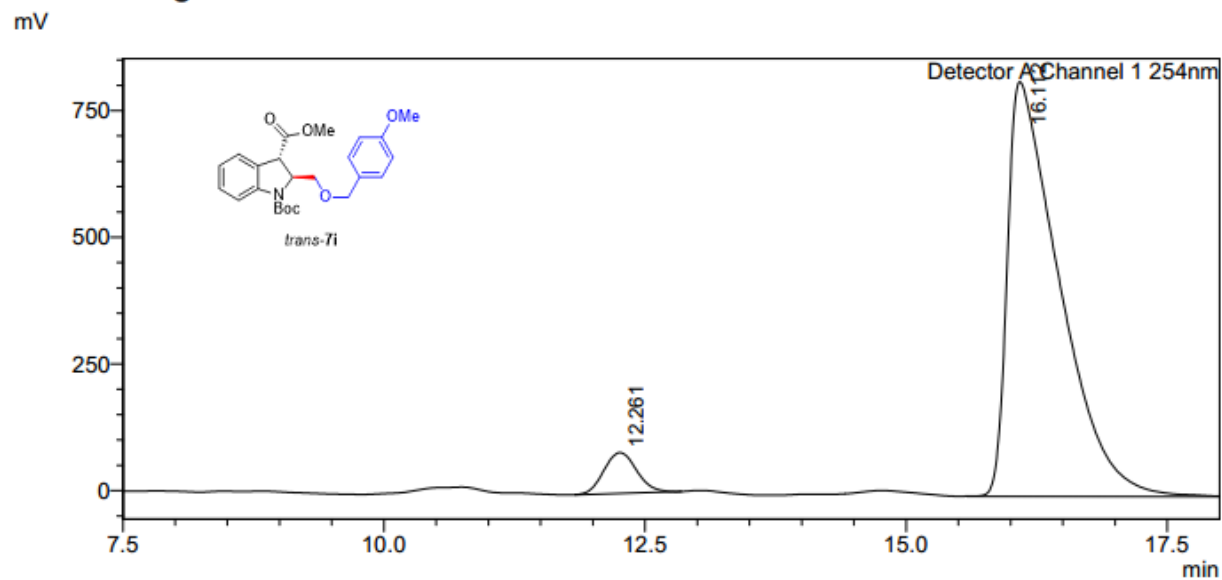

### <Peak Table>

Detector A Channel 1 254nm

| Peak# | Ret. Time | Area     | Height | Area%   |
|-------|-----------|----------|--------|---------|
| 1     | 12.261    | 1767002  | 77324  | 5.859   |
| 2     | 16.112    | 28390622 | 798296 | 94.141  |
| Total |           | 30157623 | 875619 | 100.000 |

Supplementary Figure 214. HPLC spectra of *trans-7i*

<Chromatogram>

mV

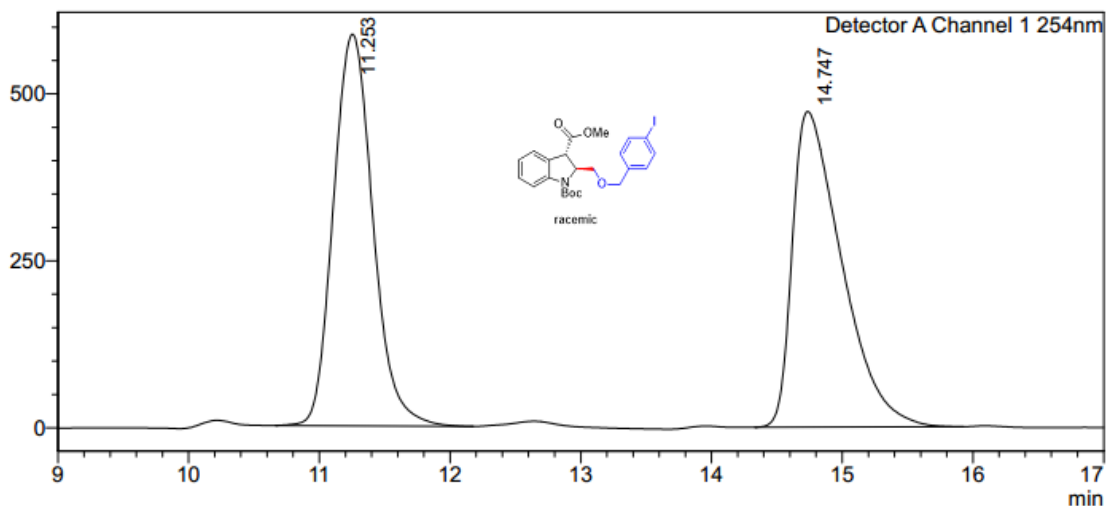

<Peak Table>

Detector A Channel 1 254nm

| Peak# | Ret. Time | Area     | Height  | Area%   |
|-------|-----------|----------|---------|---------|
| 1     | 11.253    | 12346261 | 554622  | 49.876  |
| 2     | 14.747    | 12407627 | 458946  | 50.124  |
| Total |           | 24753888 | 1013568 | 100.000 |

Supplementary Figure 215. HPLC spectra of racemic *trans*-7j

<Chromatogram>

mV

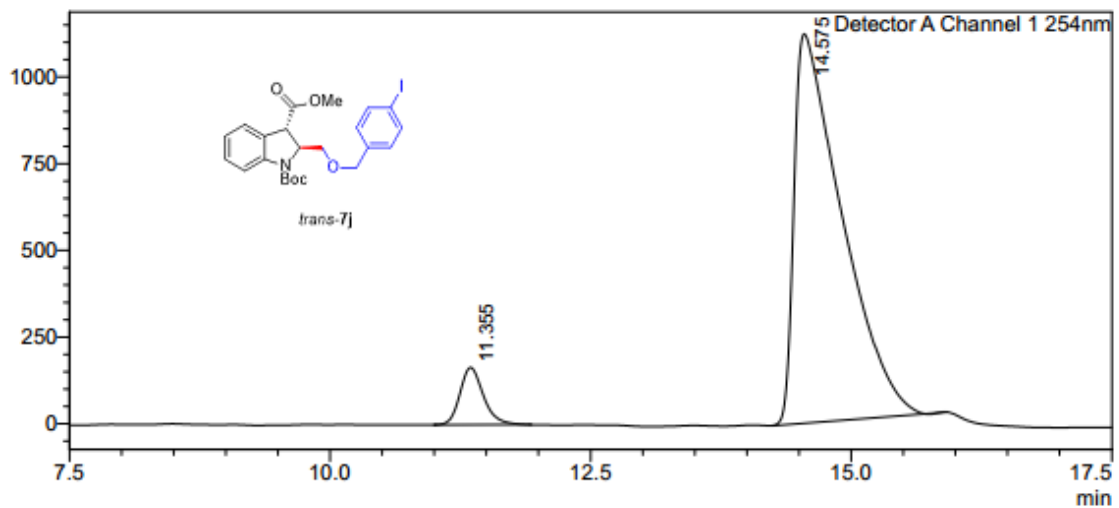

<Peak Table>

Detector A Channel 1 254nm

| Peak# | Ret. Time | Area     | Height  | Area%   |
|-------|-----------|----------|---------|---------|
| 1     | 11.355    | 2572034  | 153345  | 6.689   |
| 2     | 14.575    | 35877338 | 1105218 | 93.311  |
| Total |           | 38449371 | 1258562 | 100.000 |

Supplementary Figure 216. HPLC spectra of *trans*-7j

### <Chromatogram>

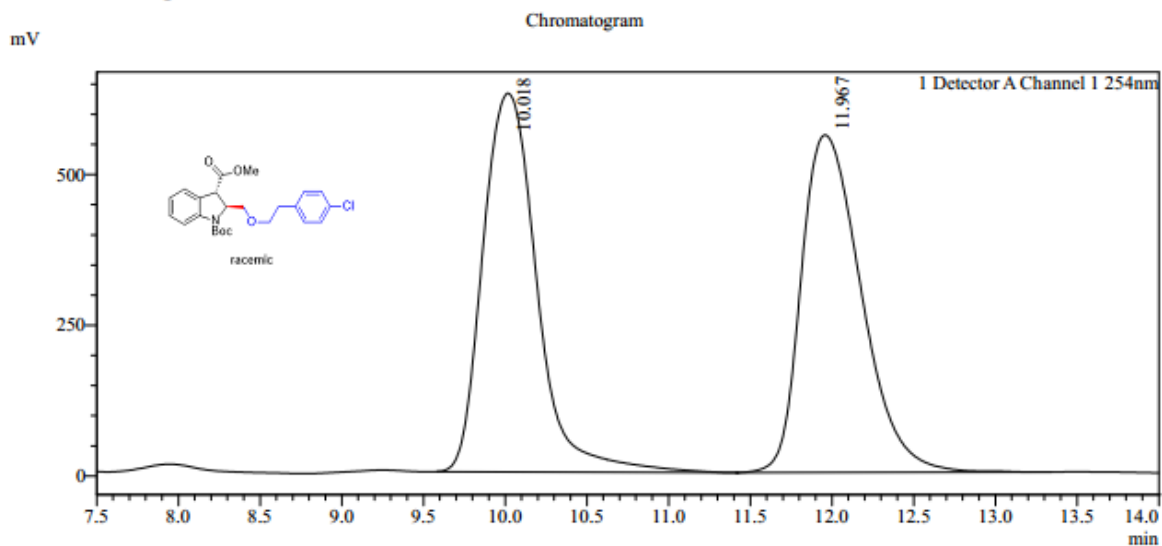

### <Peak Table>

Detector A Channel 1 254nm

| Peak# | Ret. Time | Area     | Height  | Area%   |
|-------|-----------|----------|---------|---------|
| 1     | 10.018    | 14472954 | 612732  | 50.234  |
| 2     | 11.967    | 14338212 | 554948  | 49.766  |
| Total |           | 28811166 | 1167680 | 100.000 |

Supplementary Figure 217. HPLC spectra of racemic *trans*-7k

### <Chromatogram>

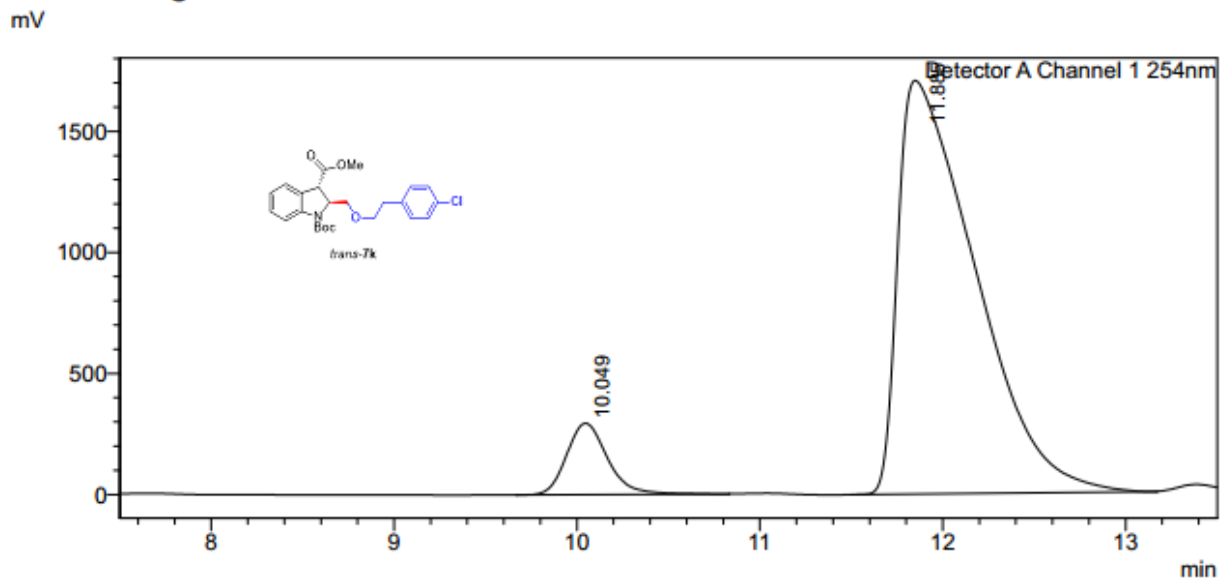

### <Peak Table>

Detector A Channel 1 254nm

| Peak# | Ret. Time | Area     | Height  | Area%   |
|-------|-----------|----------|---------|---------|
| 1     | 10.049    | 4594102  | 286314  | 8.386   |
| 2     | 11.885    | 50186919 | 1676772 | 91.614  |
| Total |           | 54781021 | 1963086 | 100.000 |

Supplementary Figure 218. HPLC spectra of *trans*-7k

### <Chromatogram>

mV

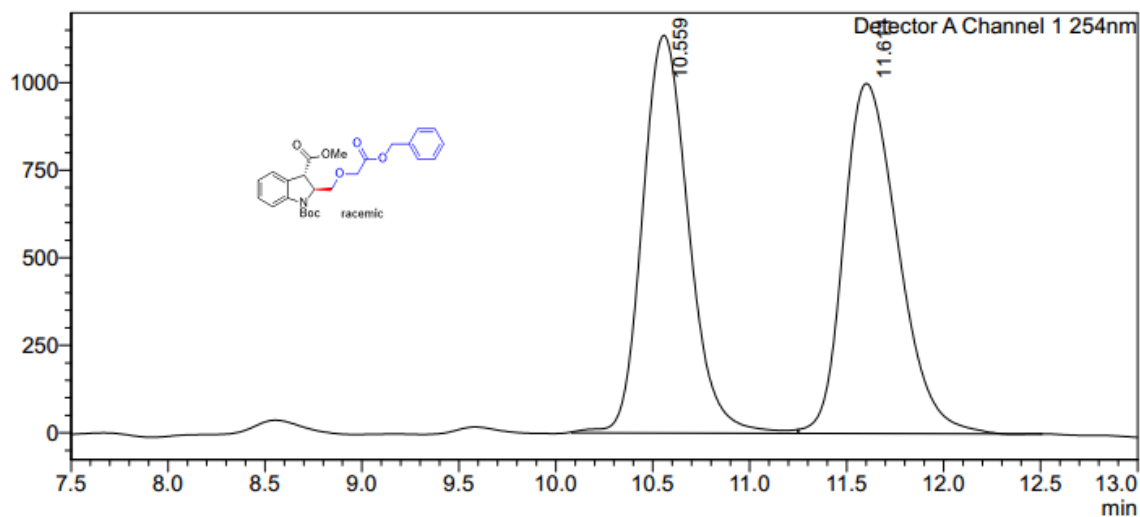

### <Peak Table>

Detector A Channel 1 254nm

| Peak# | Ret. Time | Area     | Height  | Area%   |
|-------|-----------|----------|---------|---------|
| 1     | 10.559    | 18811957 | 1103671 | 49.057  |
| 2     | 11.611    | 19534883 | 966660  | 50.943  |
| Total |           | 38346840 | 2070331 | 100.000 |

Supplementary Figure 219. HPLC spectra of racemic *trans*-7I

### <Chromatogram>

mV

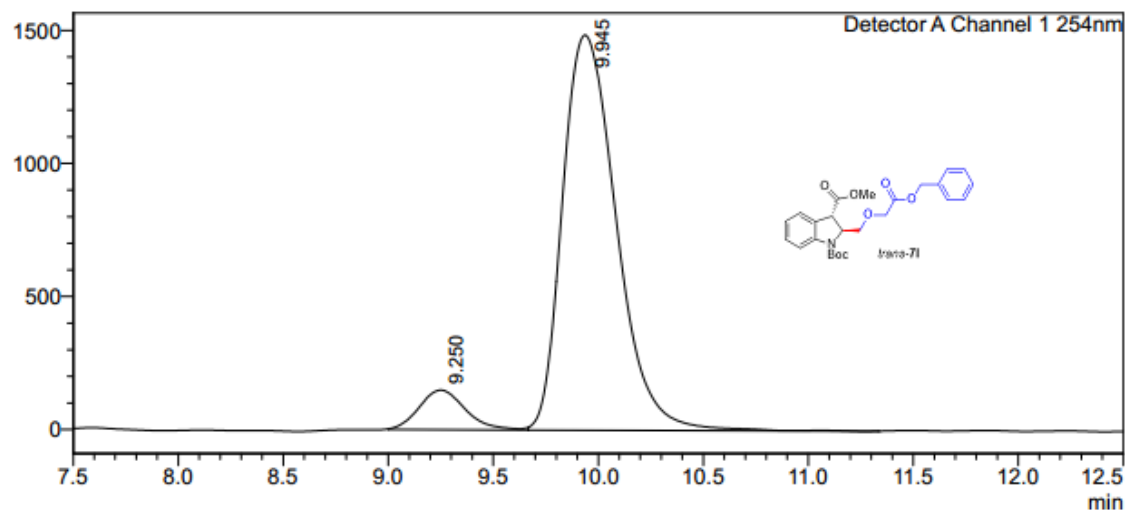

### <Peak Table>

Detector A Channel 1 254nm

| Peak# | Ret. Time | Area     | Height  | Area%   |
|-------|-----------|----------|---------|---------|
| 1     | 9.250     | 2292208  | 135139  | 7.959   |
| 2     | 9.945     | 26507915 | 1433795 | 92.041  |
| Total |           | 28800122 | 1568934 | 100.000 |

Supplementary Figure 220. HPLC spectra of *trans*-7I

### <Chromatogram>

mV

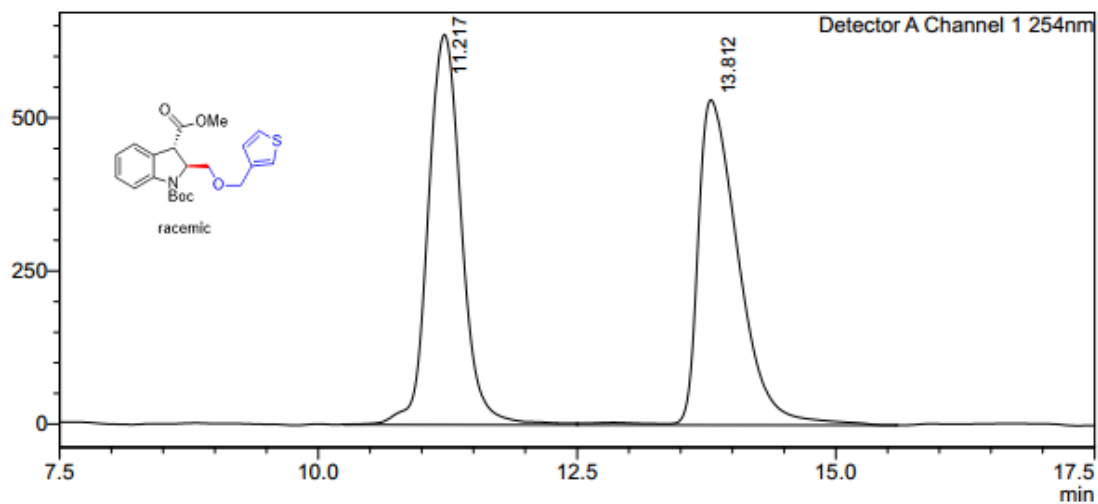

### <Peak Table>

Detector A Channel 1 254nm

| Peak# | Ret. Time | Area     | Height  | Area%   |
|-------|-----------|----------|---------|---------|
| 1     | 11.217    | 14272081 | 628588  | 49.699  |
| 2     | 13.812    | 14445183 | 525192  | 50.301  |
| Total |           | 28717264 | 1153781 | 100.000 |

Supplementary Figure 221. HPLC spectra of racemic *trans*-7m

### <Chromatogram>

mV

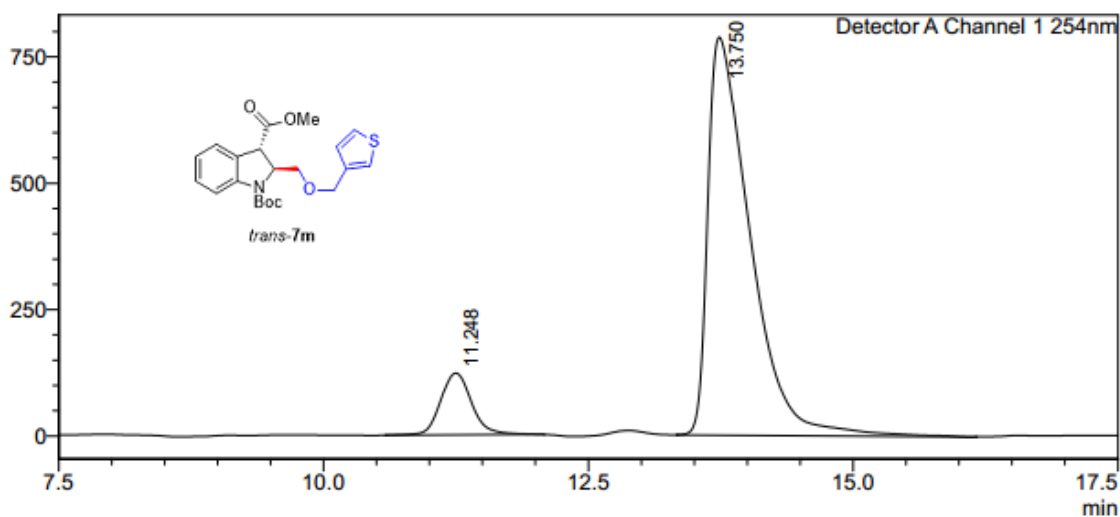

### <Peak Table>

Detector A Channel 1 254nm

| Peak# | Ret. Time | Area     | Height | Area%   |
|-------|-----------|----------|--------|---------|
| 1     | 11.248    | 2501986  | 116110 | 10.275  |
| 2     | 13.750    | 21848952 | 760632 | 89.725  |
| Total |           | 24350937 | 876742 | 100.000 |

Supplementary Figure 222. HPLC spectra of *trans*-7m

### <Chromatogram>

mV

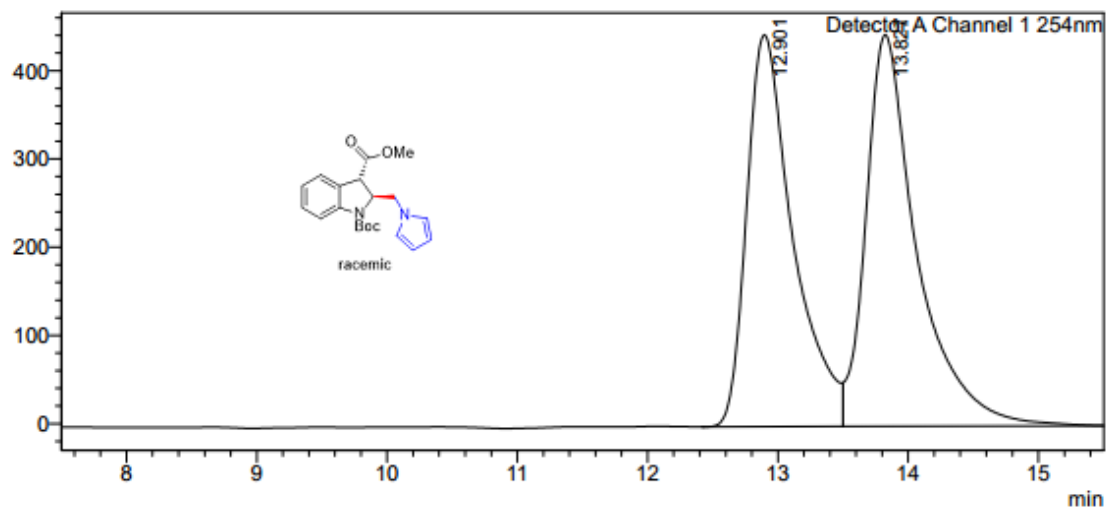

### <Peak Table>

Detector A Channel 1 254nm

| Peak# | Ret. Time | Area     | Height | Area%   |
|-------|-----------|----------|--------|---------|
| 1     | 12.901    | 10991978 | 434231 | 47.644  |
| 2     | 13.827    | 12078936 | 429063 | 52.356  |
| Total |           | 23070914 | 863295 | 100.000 |

Supplementary Figure 223. HPLC spectra of racemic *trans*-7n

### <Chromatogram>

mV

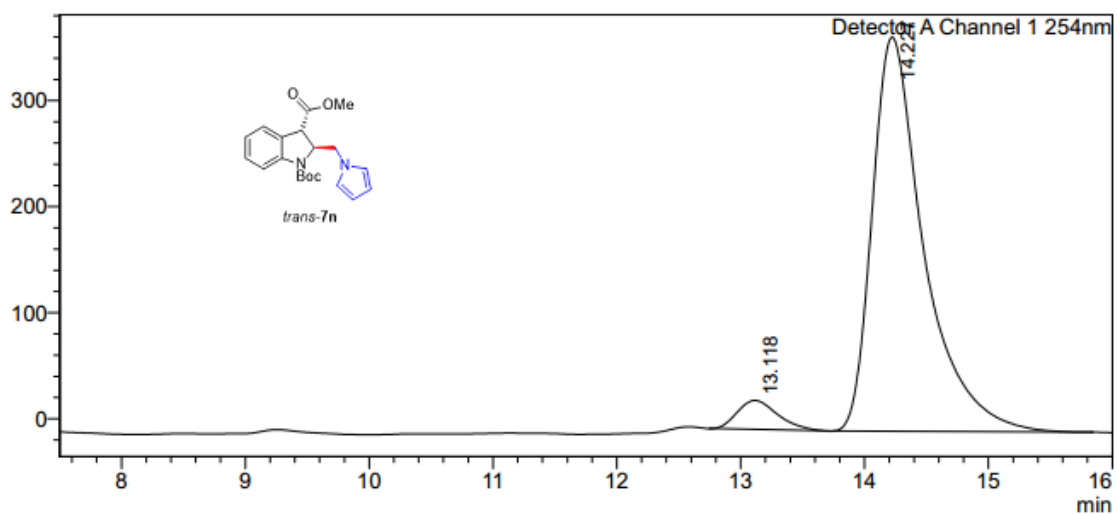

### <Peak Table>

Detector A Channel 1 254nm

| Peak# | Ret. Time | Area     | Height | Area%   |
|-------|-----------|----------|--------|---------|
| 1     | 13.118    | 615432   | 26747  | 5.401   |
| 2     | 14.227    | 10778801 | 367070 | 94.599  |
| Total |           | 11394233 | 393818 | 100.000 |

Supplementary Figure 224. HPLC spectra of *trans*-7n



### <Chromatogram>

mV

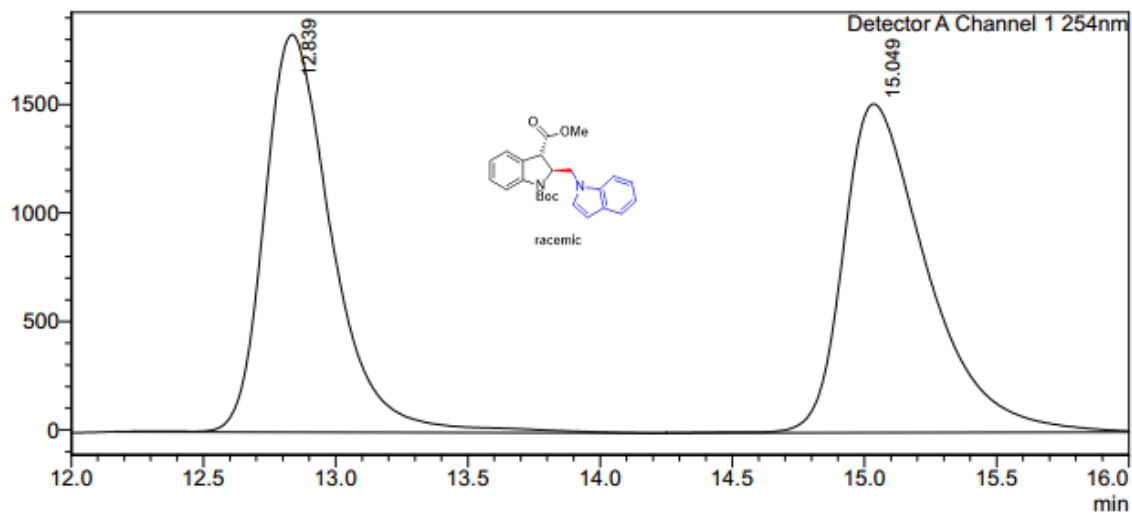

### <Peak Table>

Detector A Channel 1 254nm

| Peak# | Ret. Time | Area     | Height  | Area%   |
|-------|-----------|----------|---------|---------|
| 1     | 12.839    | 32669412 | 1676630 | 49.382  |
| 2     | 15.049    | 33487397 | 1487741 | 50.618  |
| Total |           | 66156809 | 3164371 | 100.000 |

Supplementary Figure 225. HPLC spectra of racemic *trans*-7o

### <Chromatogram>

mV

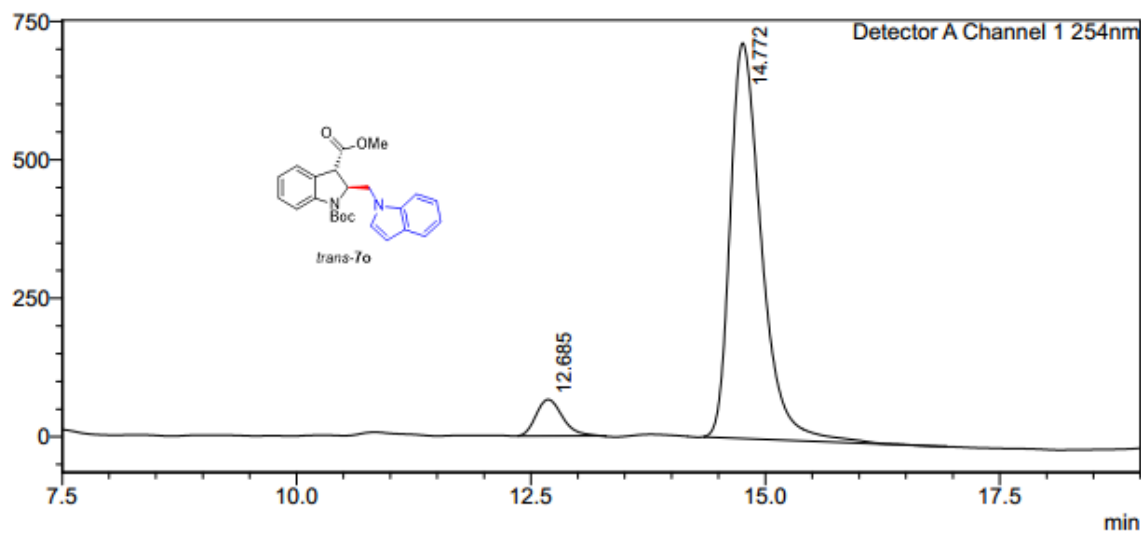

### <Peak Table>

Detector A Channel 1 254nm

| Peak# | Ret. Time | Area     | Height | Area%   |
|-------|-----------|----------|--------|---------|
| 1     | 12.685    | 1293338  | 62798  | 7.215   |
| 2     | 14.772    | 16632935 | 694863 | 92.785  |
| Total |           | 17926273 | 757661 | 100.000 |

Supplementary Figure 226. HPLC spectra of *trans*-7o

### <Chromatogram>

mV

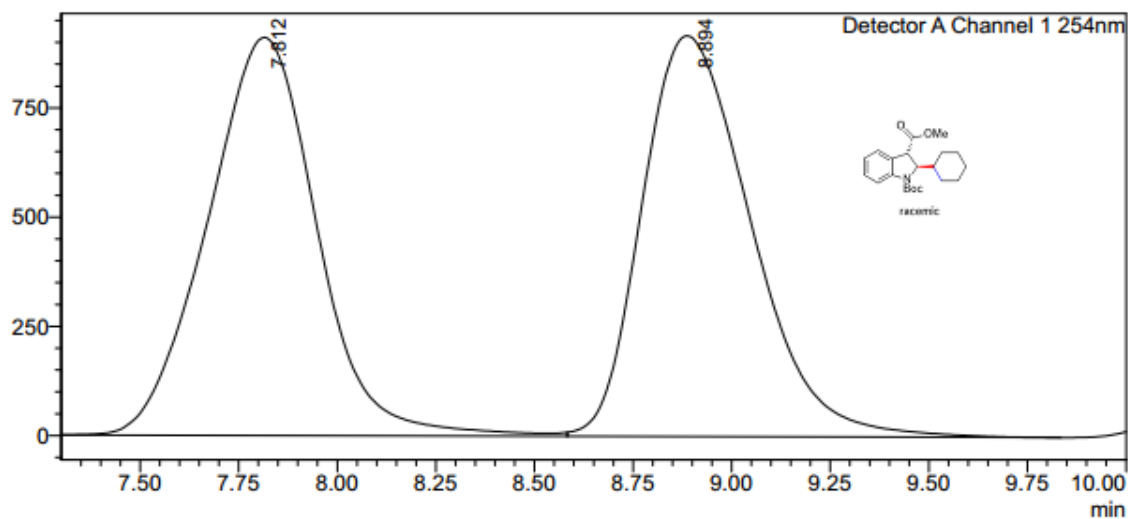

### <Peak Table>

Detector A Channel 1 254nm

| Peak# | Ret. Time | Area     | Height  | Area%   |
|-------|-----------|----------|---------|---------|
| 1     | 7.812     | 17561538 | 882282  | 49.968  |
| 2     | 8.894     | 17584174 | 898430  | 50.032  |
| Total |           | 35145712 | 1780712 | 100.000 |

Supplementary Figure 227. HPLC spectra of racemic *trans*-7p

### <Chromatogram>

mV

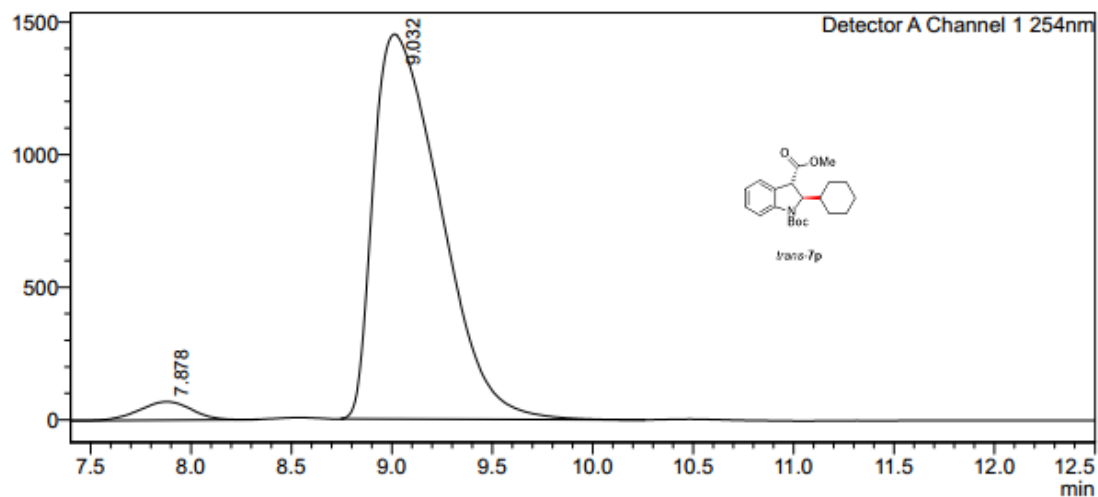

### <Peak Table>

Detector A Channel 1 254nm

| Peak# | Ret. Time | Area     | Height  | Area%   |
|-------|-----------|----------|---------|---------|
| 1     | 7.878     | 1246810  | 67703   | 3.575   |
| 2     | 9.032     | 33629020 | 1413315 | 96.425  |
| Total |           | 34875830 | 1481018 | 100.000 |

Supplementary Figure 228. HPLC spectra of *trans*-7p

### <Chromatogram>

mV

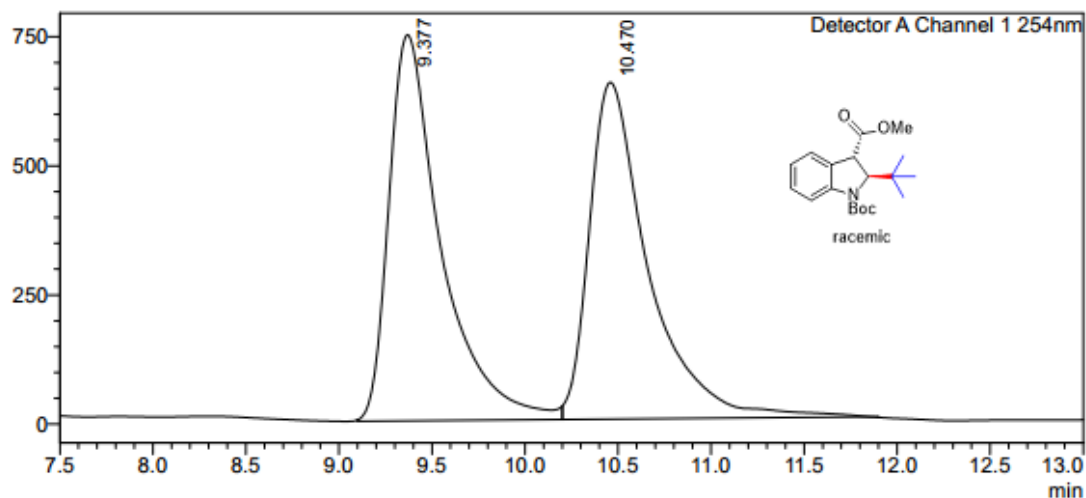

### <Peak Table>

Detector A Channel 1 254nm

| Peak# | Ret. Time | Area     | Height  | Area%   |
|-------|-----------|----------|---------|---------|
| 1     | 9.377     | 14571112 | 711673  | 50.322  |
| 2     | 10.470    | 14384876 | 632993  | 49.678  |
| Total |           | 28955988 | 1344666 | 100.000 |

Supplementary Figure 229. HPLC spectra of racemic *trans*-7q

### <Chromatogram>

mV

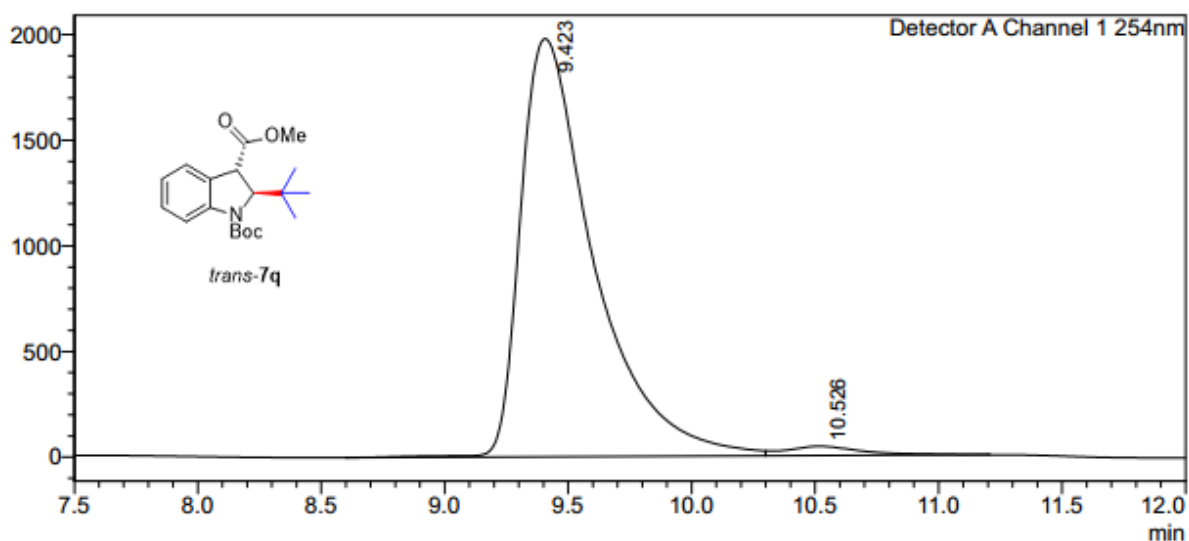

### <Peak Table>

Detector A Channel 1 254nm

| Peak# | Ret. Time | Area     | Height  | Area%   |
|-------|-----------|----------|---------|---------|
| 1     | 9.423     | 40918894 | 1825135 | 97.787  |
| 2     | 10.526    | 926127   | 40588   | 2.213   |
| Total |           | 41845021 | 1865722 | 100.000 |

Supplementary Figure 230. HPLC spectra of *trans*-7q

<Chromatogram>

mV

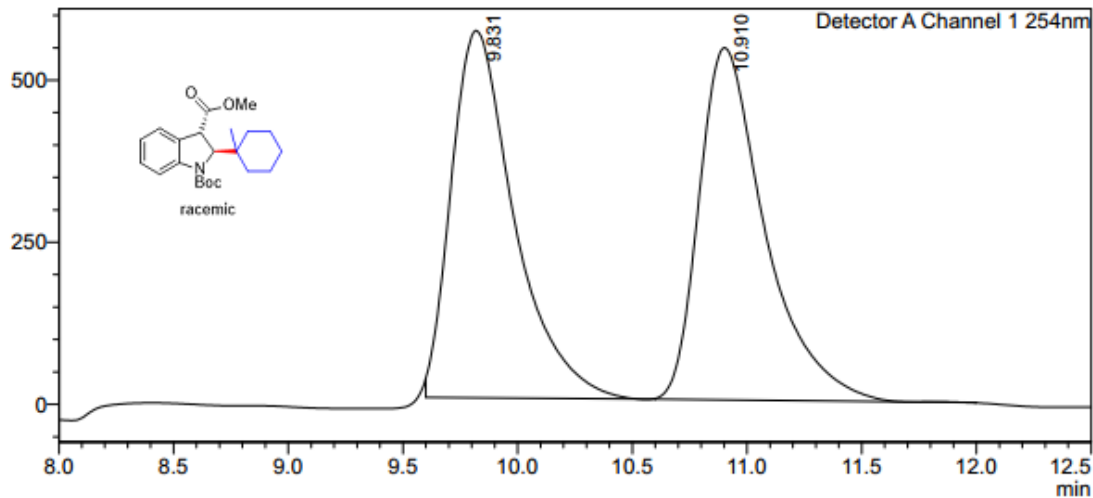

<Peak Table>

Detector A Channel 1 254nm

| Peak# | Ret. Time | Area     | Height  | Area%   |
|-------|-----------|----------|---------|---------|
| 1     | 9.831     | 10804951 | 530567  | 49.804  |
| 2     | 10.910    | 10890038 | 490741  | 50.196  |
| Total |           | 21694989 | 1021308 | 100.000 |

Supplementary Figure 231. HPLC spectra of racemic *trans-7r*

<Chromatogram>

mV

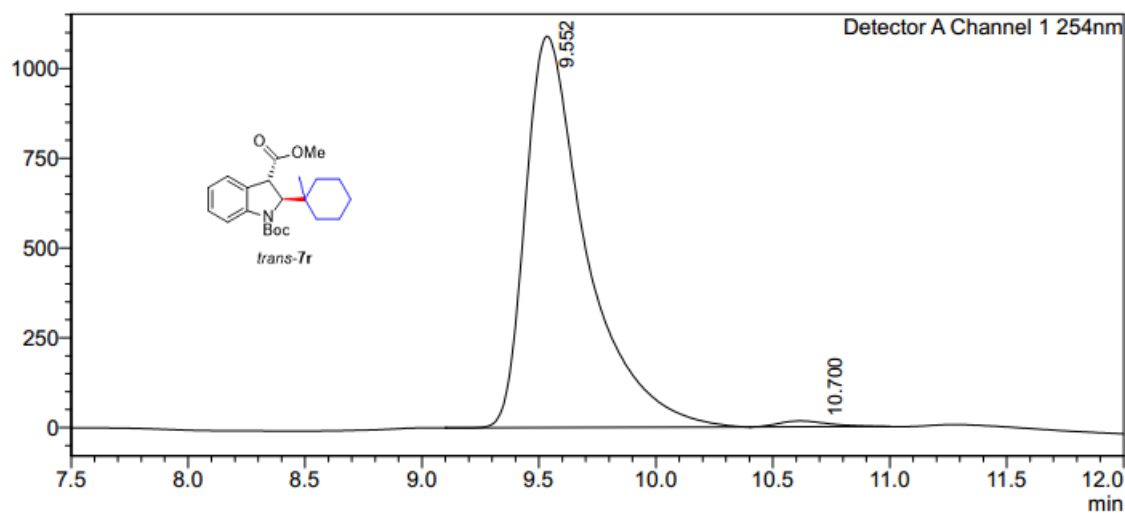

<Peak Table>

Detector A Channel 1 254nm

| Peak# | Ret. Time | Area     | Height  | Area%   |
|-------|-----------|----------|---------|---------|
| 1     | 9.552     | 19683434 | 1036886 | 98.843  |
| 2     | 10.700    | 230357   | 14197   | 1.157   |
| Total |           | 19913790 | 1051083 | 100.000 |

Supplementary Figure 232. HPLC spectra of *trans-7r*

### <Chromatogram>

mV

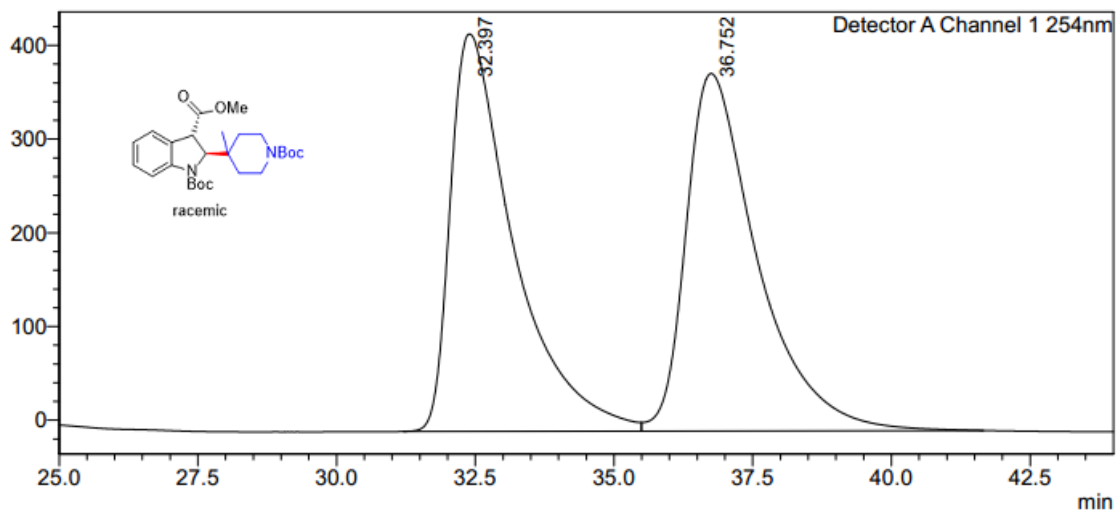

### <Peak Table>

Detector A Channel 1 254nm

| Peak# | Ret. Time | Area     | Height | Area%   |
|-------|-----------|----------|--------|---------|
| 1     | 32.397    | 33652968 | 423955 | 49.628  |
| 2     | 36.752    | 34157261 | 381521 | 50.372  |
| Total |           | 67810229 | 805477 | 100.000 |

Supplementary Figure 233. HPLC spectra of racemic *trans*-7s

### <Chromatogram>

mV

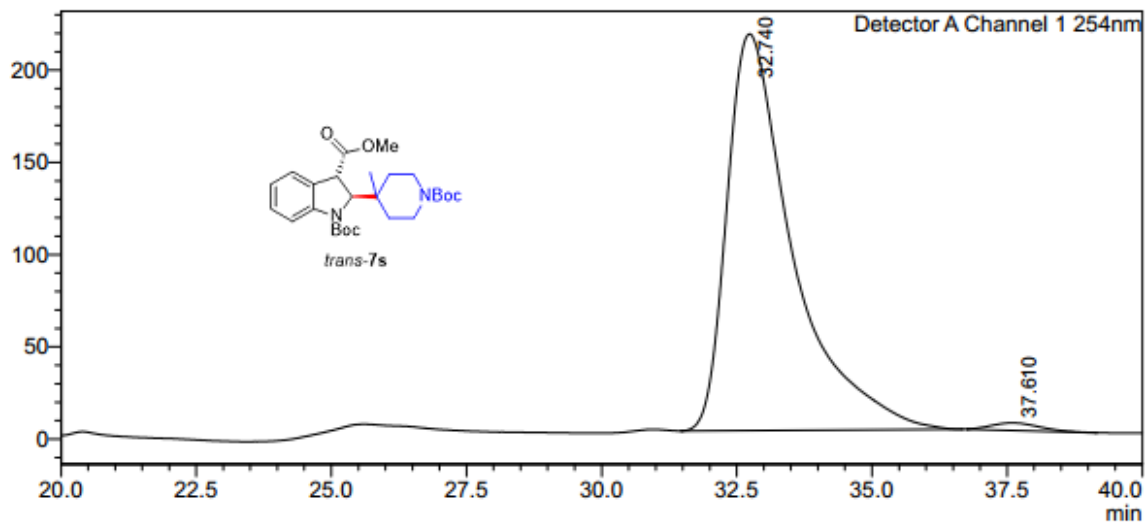

### <Peak Table>

Detector A Channel 1 254nm

| Peak# | Ret. Time | Area     | Height | Area%   |
|-------|-----------|----------|--------|---------|
| 1     | 32.740    | 18150598 | 214909 | 98.661  |
| 2     | 37.610    | 246282   | 4044   | 1.339   |
| Total |           | 18396880 | 218953 | 100.000 |

Supplementary Figure 234. HPLC spectra of *trans*-7s

### <Chromatogram>

mV

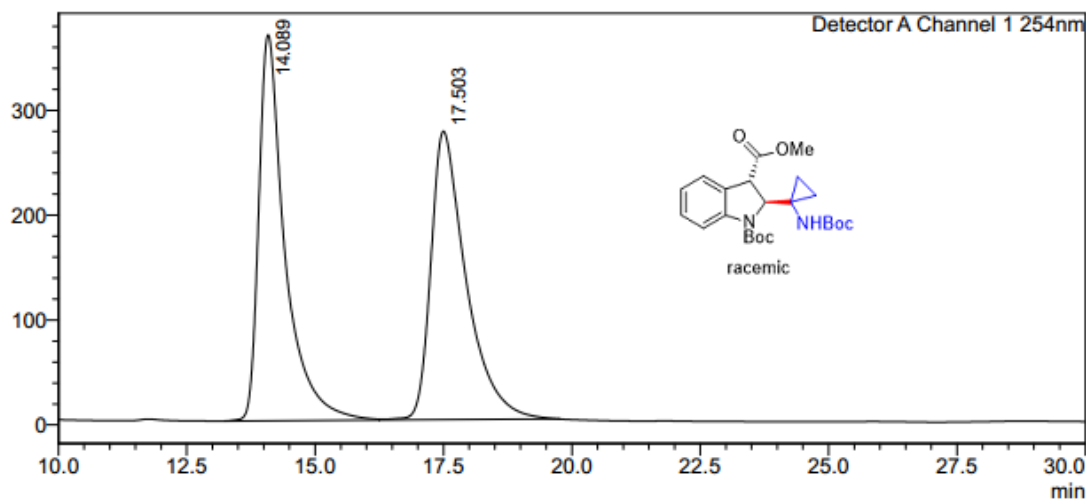

### <Peak Table>

Detector A Channel 1 254nm

| Peak# | Ret. Time | Area     | Height | Conc.  | Area%   |
|-------|-----------|----------|--------|--------|---------|
| 1     | 14.089    | 13064704 | 356651 | 49.863 | 49.863  |
| 2     | 17.503    | 13136589 | 270590 | 50.137 | 50.137  |
| Total |           | 26201292 | 627241 |        | 100.000 |

Supplementary Figure 235. HPLC spectra of racemic *trans*-7t

### <Chromatogram>

mV

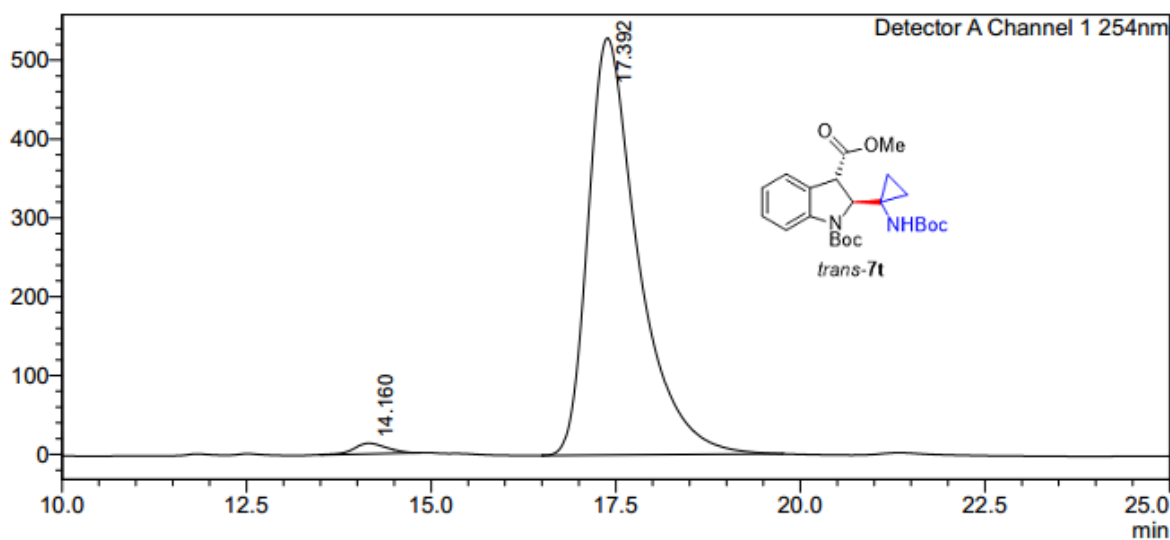

### <Peak Table>

Detector A Channel 1 254nm

| Peak# | Ret. Time | Area     | Height | Area%   |
|-------|-----------|----------|--------|---------|
| 1     | 14.160    | 411352   | 13137  | 1.624   |
| 2     | 17.392    | 24921732 | 526448 | 98.376  |
| Total |           | 25333084 | 539585 | 100.000 |

Supplementary Figure 236. HPLC spectra of *trans*-7t

### <Chromatogram>

mV

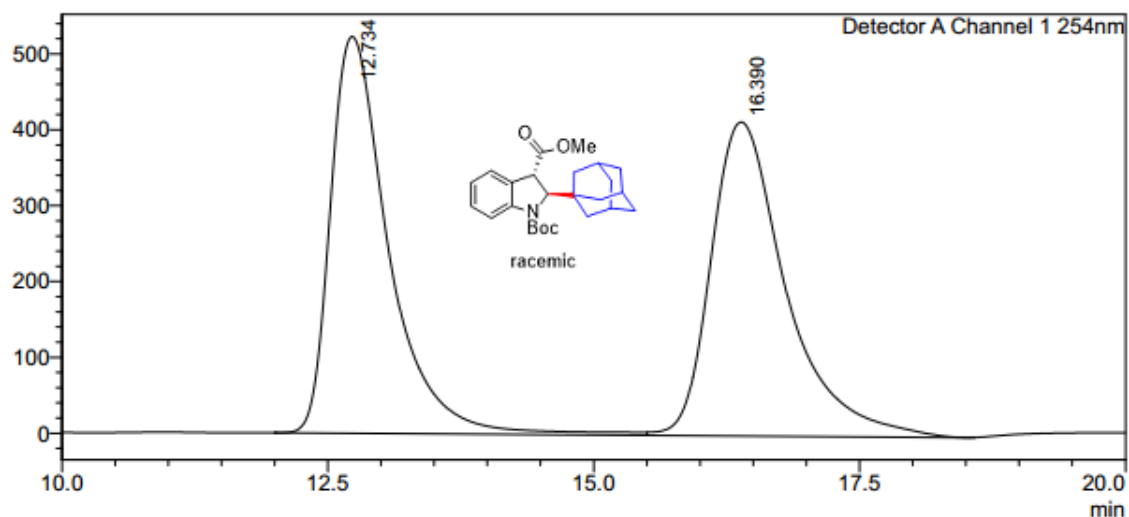

### <Peak Table>

Detector A Channel 1 254nm

| Peak# | Ret. Time | Area     | Height | Area%   |
|-------|-----------|----------|--------|---------|
| 1     | 12.734    | 19933070 | 518623 | 49.589  |
| 2     | 16.390    | 20263332 | 412281 | 50.411  |
| Total |           | 40196403 | 930904 | 100.000 |

Supplementary Figure 237. HPLC spectra of racemic *trans*-7u

### <Chromatogram>

mV

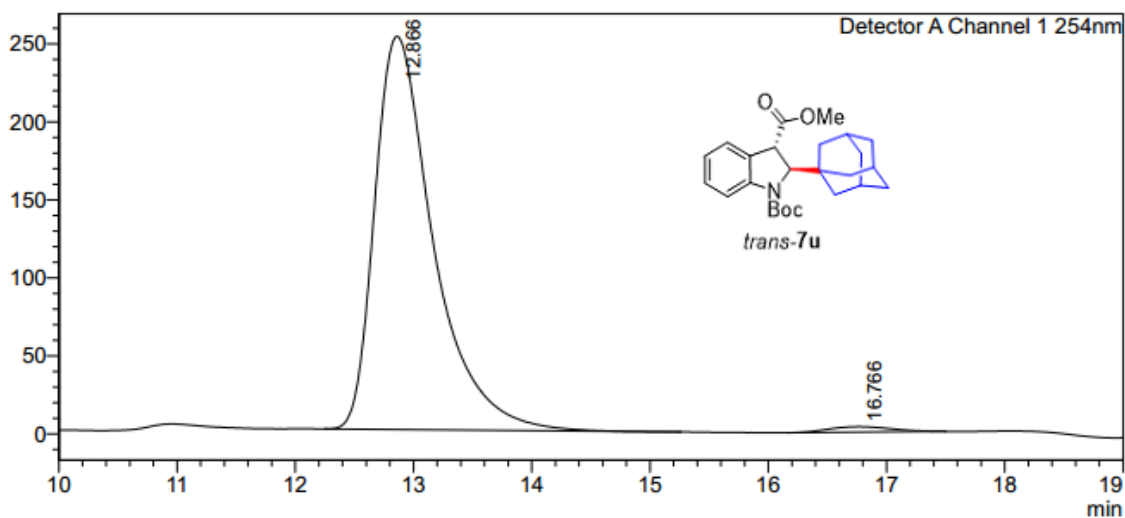

### <Peak Table>

Detector A Channel 1 254nm

| Peak# | Ret. Time | Area    | Height | Area%   |
|-------|-----------|---------|--------|---------|
| 1     | 12.866    | 8679467 | 249463 | 98.544  |
| 2     | 16.766    | 128222  | 3445   | 1.456   |
| Total |           | 8807689 | 252908 | 100.000 |

Supplementary Figure 238. HPLC spectra of *trans*-7u

### <Chromatogram>

mV

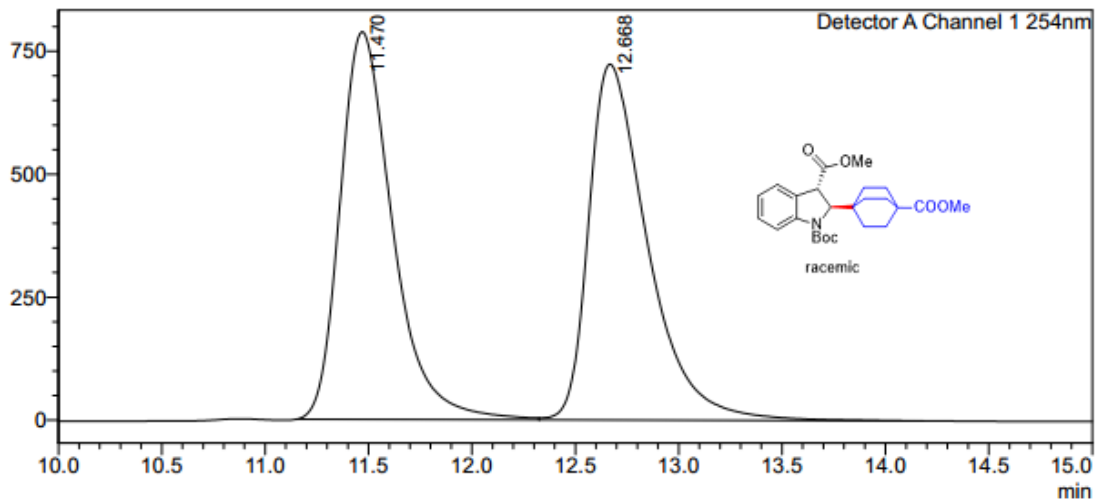

### <Peak Table>

Detector A Channel 1 254nm

| Peak# | Ret. Time | Area     | Height  | Area%   |
|-------|-----------|----------|---------|---------|
| 1     | 11.470    | 13981040 | 787983  | 49.348  |
| 2     | 12.668    | 14350543 | 723729  | 50.652  |
| Total |           | 28331583 | 1511711 | 100.000 |

Supplementary Figure 239. HPLC spectra of racemic *trans*-7v

### <Chromatogram>

mV

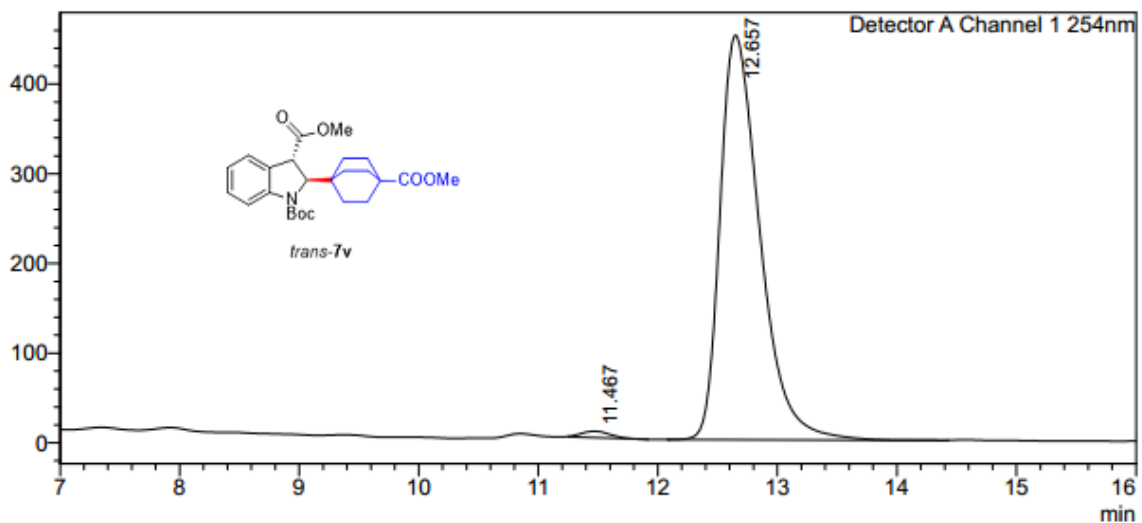

### <Peak Table>

Detector A Channel 1 254nm

| Peak# | Ret. Time | Area     | Height | Area%   |
|-------|-----------|----------|--------|---------|
| 1     | 11.467    | 115934   | 6937   | 1.097   |
| 2     | 12.657    | 10457003 | 439212 | 98.903  |
| Total |           | 10572937 | 446148 | 100.000 |

Supplementary Figure 240. HPLC spectra of *trans*-7v



### <Chromatogram>

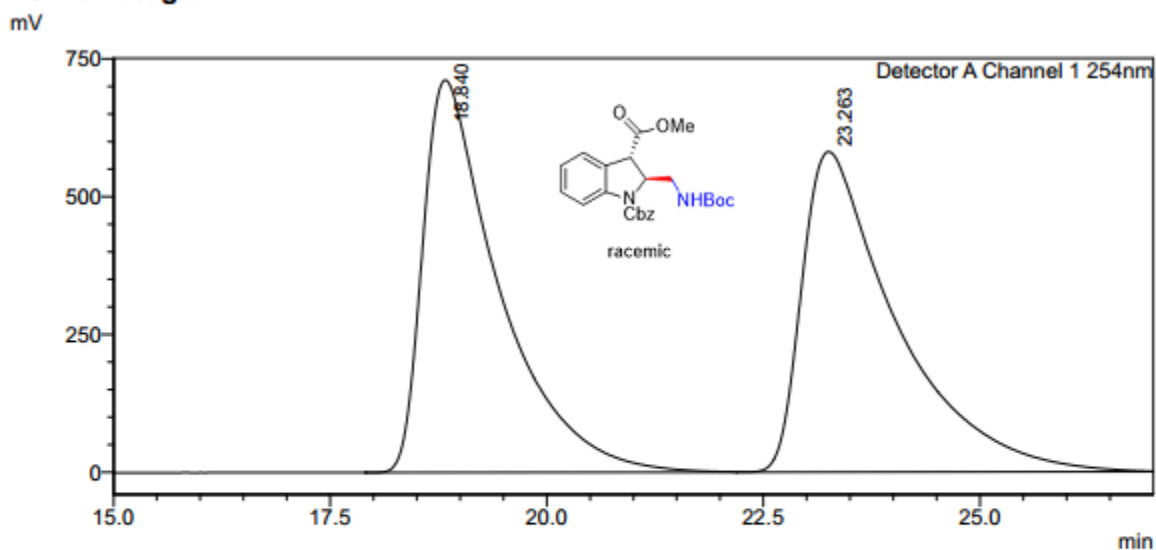

### <Peak Table>

Detector A Channel 1 254nm

| Peak# | Ret. Time | Area     | Height  | Area%   |
|-------|-----------|----------|---------|---------|
| 1     | 18.840    | 43703642 | 707298  | 49.808  |
| 2     | 23.263    | 44040060 | 579635  | 50.192  |
| Total |           | 87743701 | 1286933 | 100.000 |

Supplementary Figure 241. HPLC spectra of racemic *trans*-7w

### <Chromatogram>

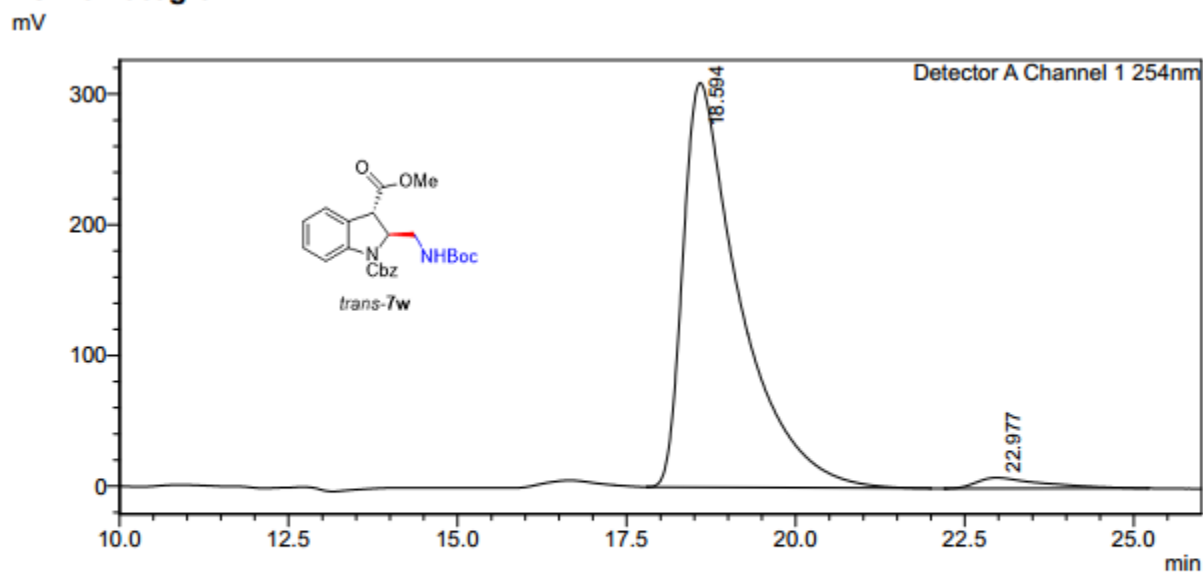

### <Peak Table>

Detector A Channel 1 254nm

| Peak# | Ret. Time | Area     | Height | Area%   |
|-------|-----------|----------|--------|---------|
| 1     | 18.594    | 18060706 | 305361 | 97.047  |
| 2     | 22.977    | 549480   | 8128   | 2.953   |
| Total |           | 18610186 | 313489 | 100.000 |

Supplementary Figure 242. HPLC spectra of *trans*-7w

### <Chromatogram>

mV

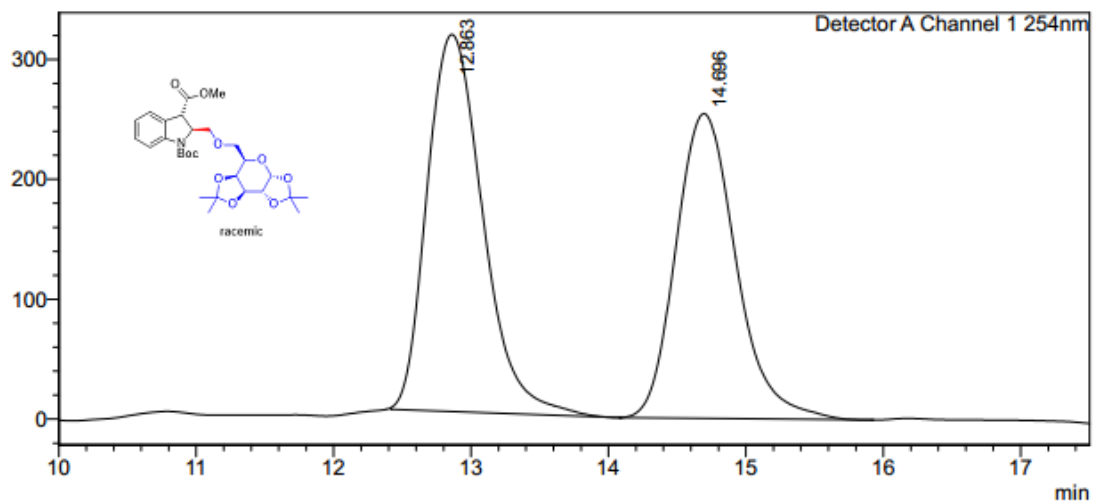

### <Peak Table>

Detector A Channel 1 254nm

| Peak# | Ret. Time | Area     | Height | Area%   |
|-------|-----------|----------|--------|---------|
| 1     | 12.863    | 8852908  | 310617 | 53.403  |
| 2     | 14.696    | 7724531  | 251416 | 46.597  |
| Total |           | 16577439 | 562033 | 100.000 |

Supplementary Figure 243. HPLC spectra of racemic *trans*-7x

### <Chromatogram>

mV

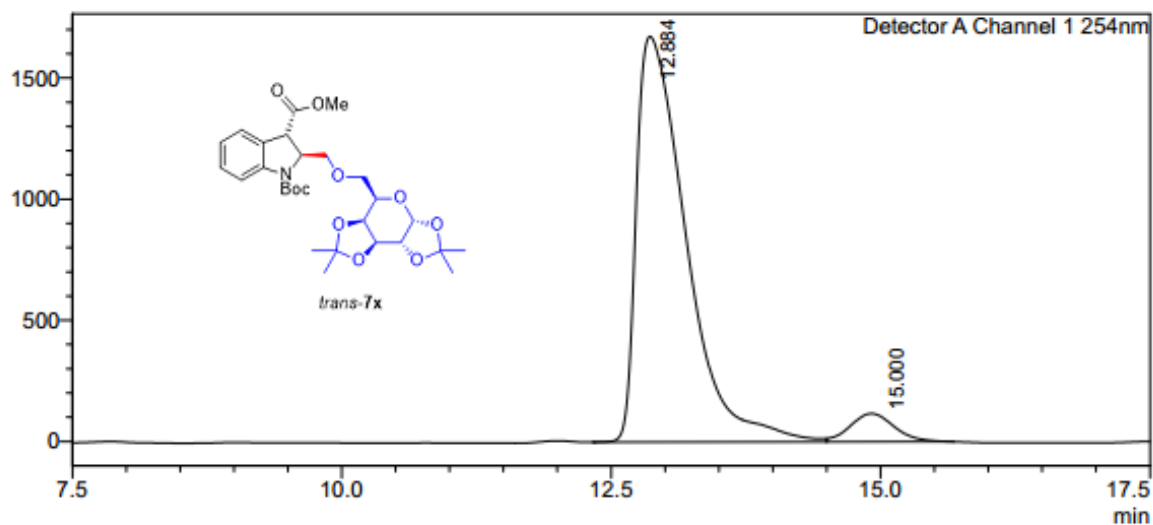

### <Peak Table>

Detector A Channel 1 254nm

| Peak# | Ret. Time | Area     | Height  | Area%   |
|-------|-----------|----------|---------|---------|
| 1     | 12.884    | 53511366 | 1659789 | 94.219  |
| 2     | 15.000    | 3283537  | 111474  | 5.781   |
| Total |           | 56794903 | 1771263 | 100.000 |

Supplementary Figure 244. HPLC spectra of *trans*-7x

### <Chromatogram>

mV

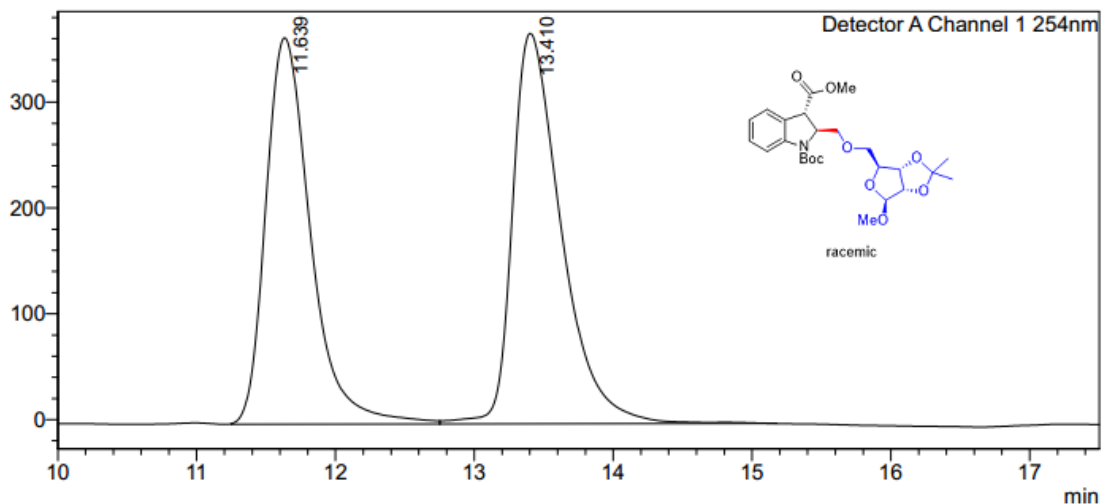

### <Peak Table>

Detector A Channel 1 254nm

| Peak# | Ret. Time | Area     | Height | Area%   |
|-------|-----------|----------|--------|---------|
| 1     | 11.639    | 8201890  | 359643 | 47.663  |
| 2     | 13.410    | 9006152  | 357707 | 52.337  |
| Total |           | 17208043 | 717350 | 100.000 |

Supplementary Figure 245. HPLC spectra of racemic *trans*-7y

### <Chromatogram>

mV

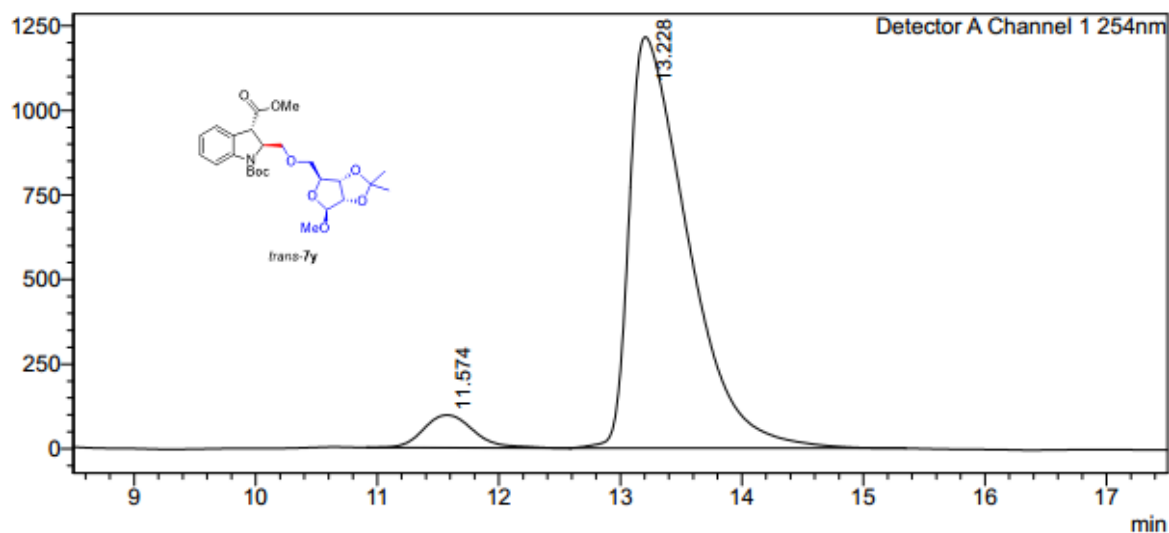

### <Peak Table>

Detector A Channel 1 254nm

| Peak# | Ret. Time | Area     | Height  | Area%   |
|-------|-----------|----------|---------|---------|
| 1     | 11.574    | 2774478  | 94933   | 6.381   |
| 2     | 13.228    | 40704950 | 1205955 | 93.619  |
| Total |           | 43479429 | 1300888 | 100.000 |

Supplementary Figure 246. HPLC spectra of *trans*-7y

### <Chromatogram>

mV

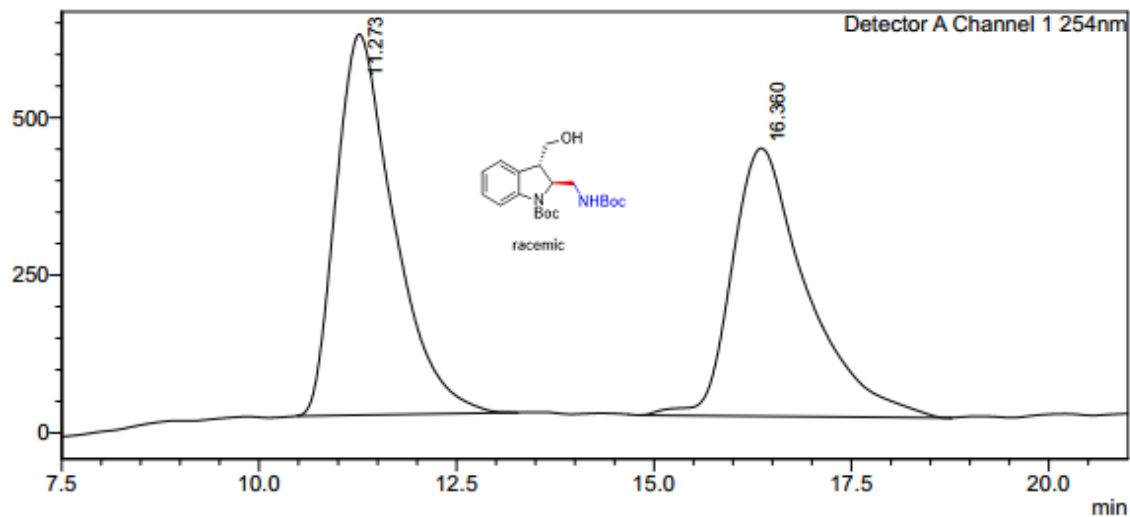

### <Peak Table>

Detector A Channel 1 254nm

| Peak# | Ret. Time | Area     | Height  | Conc.  | Area%   |
|-------|-----------|----------|---------|--------|---------|
| 1     | 11.273    | 30823634 | 599166  | 52.370 | 52.370  |
| 2     | 16.360    | 28033779 | 423265  | 47.630 | 47.630  |
| Total |           | 58857413 | 1022431 |        | 100.000 |

Supplementary Figure 247. HPLC spectra of racemic *trans*-8a

### <Chromatogram>

mV

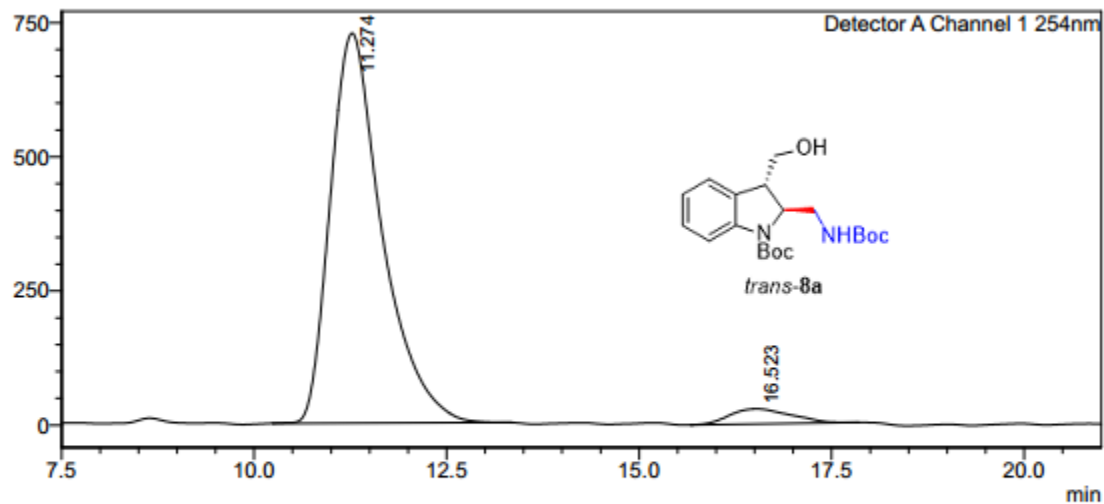

### <Peak Table>

Detector A Channel 1 254nm

| Peak# | Ret. Time | Area     | Height | Area%   |
|-------|-----------|----------|--------|---------|
| 1     | 11.274    | 34088713 | 721356 | 95.631  |
| 2     | 16.523    | 1557420  | 28020  | 4.369   |
| Total |           | 35646133 | 749376 | 100.000 |

Supplementary Figure 248. HPLC spectra of *trans*-8a

### <Chromatogram>

mV

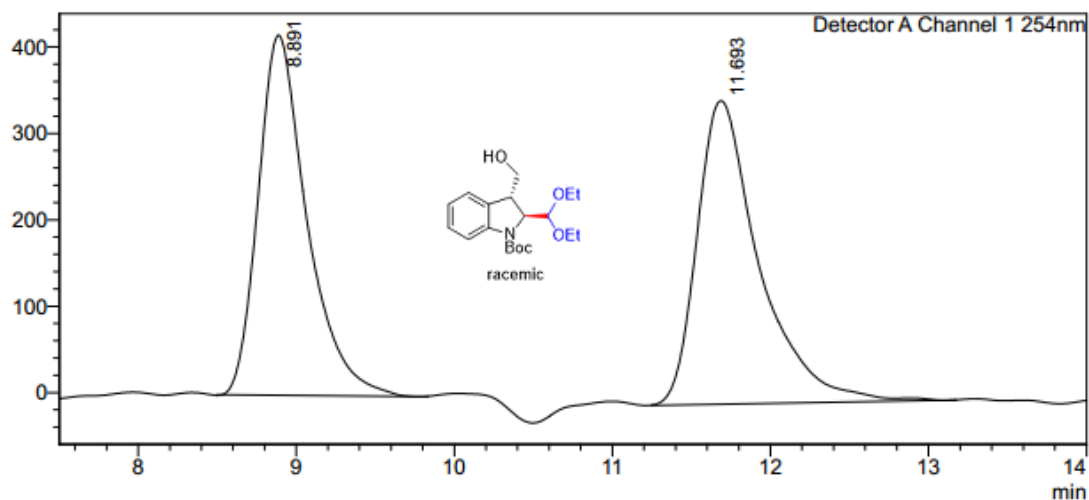

### <Peak Table>

Detector A Channel 1 254nm

| Peak# | Ret. Time | Area     | Height | Area%   |
|-------|-----------|----------|--------|---------|
| 1     | 8.891     | 8939504  | 407953 | 48.230  |
| 2     | 11.693    | 9595675  | 343319 | 51.770  |
| Total |           | 18535179 | 751272 | 100.000 |

Supplementary Figure 249. HPLC spectra of racemic *trans*-8b

### <Chromatogram>

mV

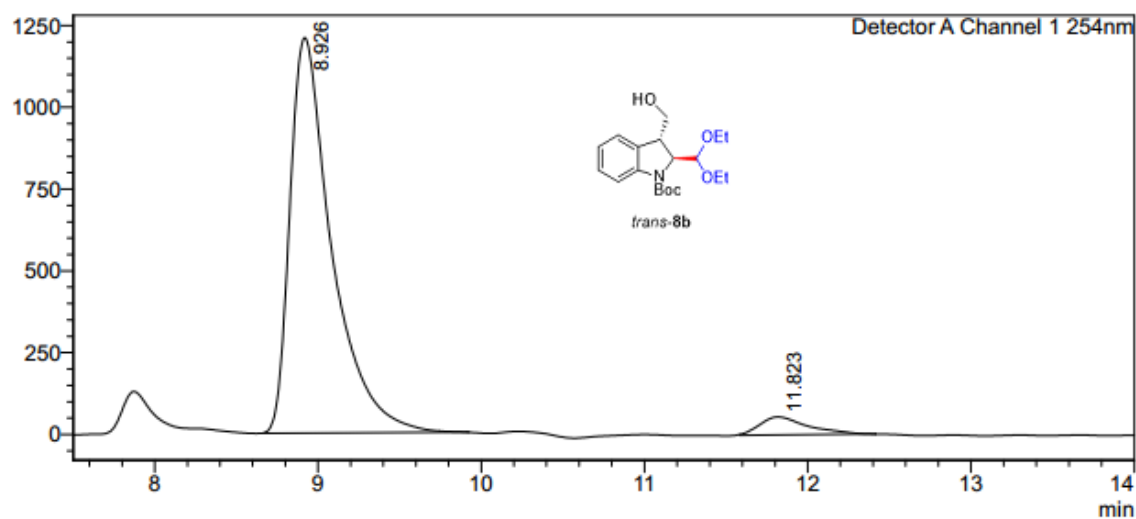

### <Peak Table>

Detector A Channel 1 254nm

| Peak# | Ret. Time | Area     | Height  | Area%   |
|-------|-----------|----------|---------|---------|
| 1     | 8.926     | 21523130 | 1097136 | 95.021  |
| 2     | 11.823    | 1127672  | 52749   | 4.979   |
| Total |           | 22650802 | 1149885 | 100.000 |

Supplementary Figure 250. HPLC spectra of *trans*-8b

### <Chromatogram>

mV

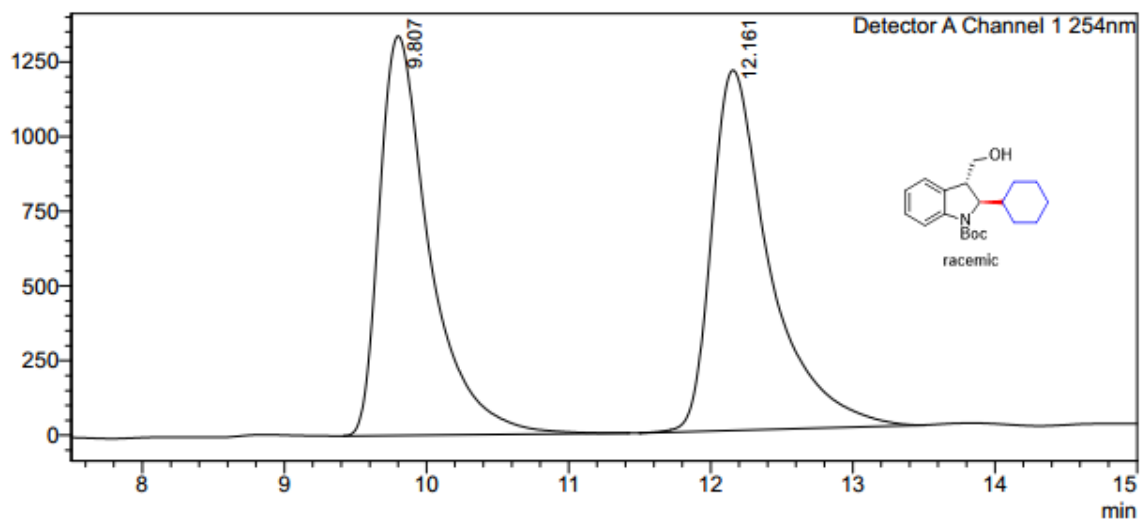

### <Peak Table>

Detector A Channel 1 254nm

| Peak# | Ret. Time | Area     | Height  | Area%   |
|-------|-----------|----------|---------|---------|
| 1     | 9.807     | 32860655 | 1317480 | 48.914  |
| 2     | 12.161    | 34319968 | 1171920 | 51.086  |
| Total |           | 67180623 | 2489401 | 100.000 |

Supplementary Figure 251. HPLC spectra of racemic *trans*-8c

### <Chromatogram>

mV

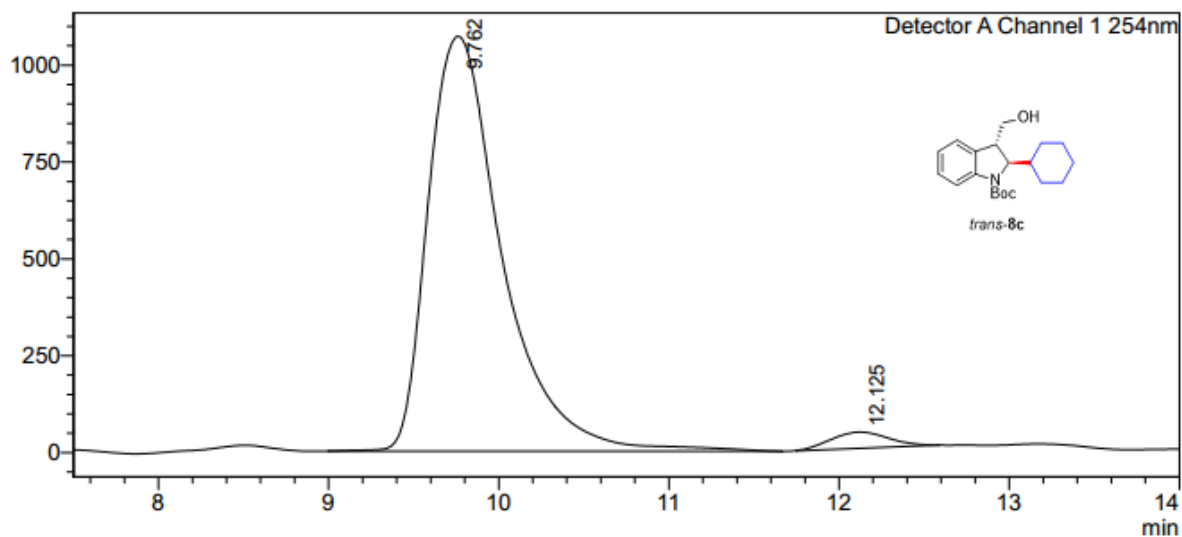

### <Peak Table>

Detector A Channel 1 254nm

| Peak# | Ret. Time | Area     | Height  | Area%   |
|-------|-----------|----------|---------|---------|
| 1     | 9.762     | 32504891 | 1048379 | 97.009  |
| 2     | 12.125    | 1002145  | 41497   | 2.991   |
| Total |           | 33507036 | 1089876 | 100.000 |

Supplementary Figure 252. HPLC spectra of *trans*-8c

### <Chromatogram>

mV

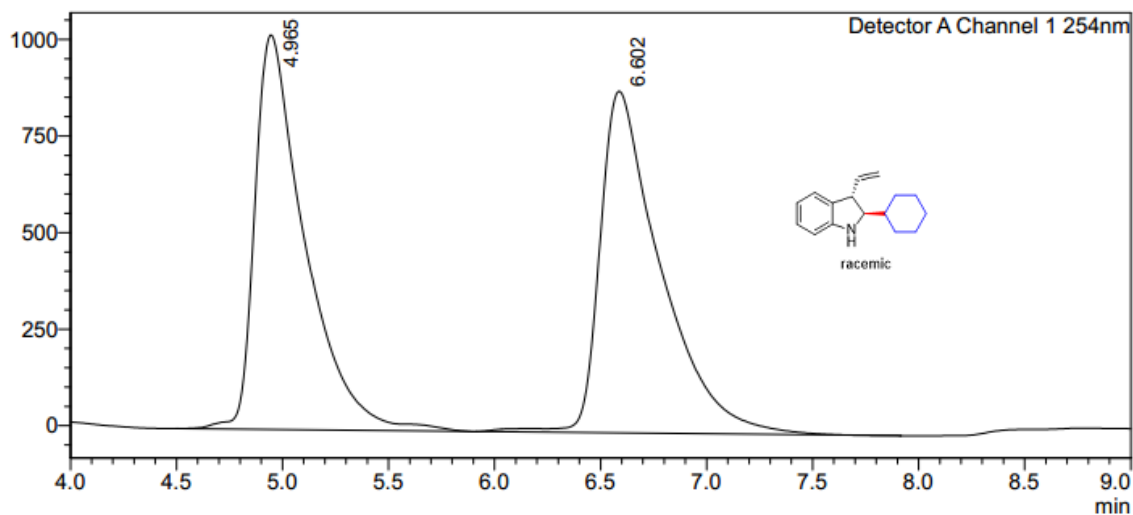

### <Peak Table>

Detector A Channel 1 254nm

| Peak# | Ret. Time | Area     | Height  | Area%   |
|-------|-----------|----------|---------|---------|
| 1     | 4.965     | 16776511 | 974366  | 48.750  |
| 2     | 6.602     | 17636695 | 815266  | 51.250  |
| Total |           | 34413205 | 1789631 | 100.000 |

Supplementary Figure 253. HPLC spectra of racemic *trans*-11

### <Chromatogram>

mV

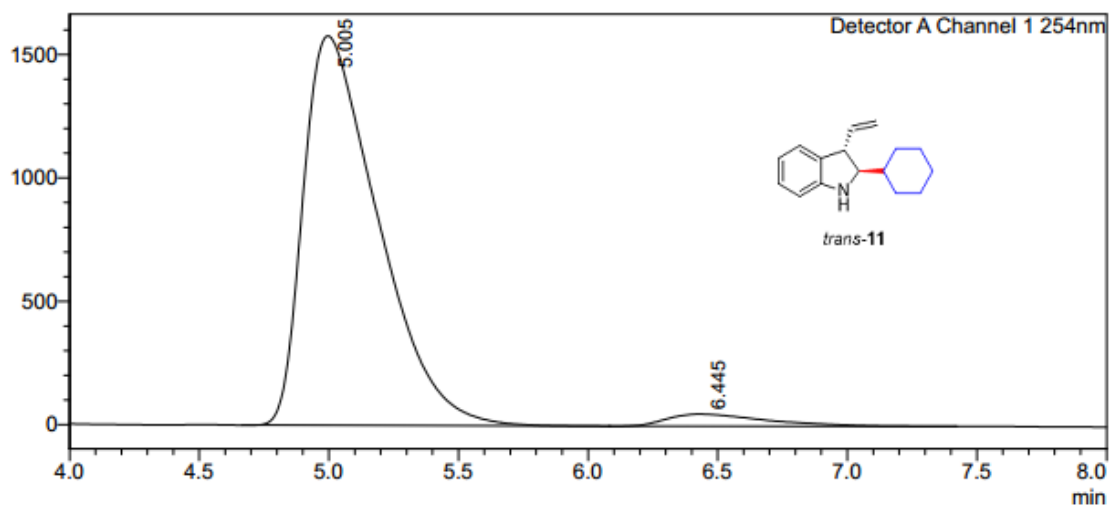

### <Peak Table>

Detector A Channel 1 254nm

| Peak# | Ret. Time | Area     | Height  | Area%   |
|-------|-----------|----------|---------|---------|
| 1     | 5.005     | 31728601 | 1465764 | 96.082  |
| 2     | 6.445     | 1293674  | 47872   | 3.918   |
| Total |           | 33022275 | 1513636 | 100.000 |

Supplementary Figure 254. HPLC spectra of *trans*-11
